# Supplementary material for: Adverse pregnancy and birth outcomes associated with Mycoplasma hominis, Ureaplasma urealyticum and Ureaplasma parvum: a systematic review and meta-analysis
Source: PubMed Central journal article supplement (PMC9422885; doi:10.1136/bmjopen-2022-062990), 2022-08-26
Supplement: bmjopen-2022-062990.draft_revisions.pdf [file bmjopen-2022-062990.draft_revisions.pdf]

# BMJ Open

BMJ Open is committed to open peer review. As part of this commitment we make the peer review history of every article we publish publicly available.

When an article is published we post the peer reviewers' comments and the authors' responses online. We also post the versions of the paper that were used during peer review. These are the versions that the peer review comments apply to.

The versions of the paper that follow are the versions that were submitted during the peer review process. They are not the versions of record or the final published versions. They should not be cited or distributed as the published version of this manuscript.

BMJ Open is an open access journal and the full, final, typeset and author-corrected version of record of the manuscript is available on our site with no access controls, subscription charges or pay-per-view fees (<http://bmjopen.bmj.com>).

If you have any questions on BMJ Open's open peer review process please email [info.bmjopen@bmj.com](mailto:info.bmjopen@bmj.com)

# BMJ Open

## Adverse pregnancy and birth outcomes associated with *Mycoplasma hominis*, *Ureaplasma urealyticum* and *Ureaplasma parvum*: A systematic review and meta-analysis

|                               |                                                                                                                                                                                                                                                                                                                                                                                                                                                                                                                                                                                                                                                                                                                                                                              |
|-------------------------------|------------------------------------------------------------------------------------------------------------------------------------------------------------------------------------------------------------------------------------------------------------------------------------------------------------------------------------------------------------------------------------------------------------------------------------------------------------------------------------------------------------------------------------------------------------------------------------------------------------------------------------------------------------------------------------------------------------------------------------------------------------------------------|
| Journal:                      | <i>BMJ Open</i>                                                                                                                                                                                                                                                                                                                                                                                                                                                                                                                                                                                                                                                                                                                                                              |
| Manuscript ID                 | bmjopen-2022-062990                                                                                                                                                                                                                                                                                                                                                                                                                                                                                                                                                                                                                                                                                                                                                          |
| Article Type:                 | Original research                                                                                                                                                                                                                                                                                                                                                                                                                                                                                                                                                                                                                                                                                                                                                            |
| Date Submitted by the Author: | 21-Mar-2022                                                                                                                                                                                                                                                                                                                                                                                                                                                                                                                                                                                                                                                                                                                                                                  |
| Complete List of Authors:     | Jonduo, Marinjho; University of New South Wales Faculty of Medicine, Kirby Institute<br>Vallely, Lisa; University of New South Wales Faculty of Medicine, Kirby Institute<br>Wand, Handan; University of New South Wales Faculty of Medicine, Kirby Institute<br>Sweeney, Emma; The University of Queensland Centre for Clinical Research<br>Egli-Gany, Dianne; Universitat Bern Institut fur Sozial- und Praventivmedizin,<br>Kaldor, John; University of New South Wales Faculty of Medicine, Kirby Institute<br>Vallely, Andrew; University of New South Wales Faculty of Medicine, Kirby Institute,; Papua New Guinea Institute of Medical Research, Sexual and Reproductive Health Unit<br>Low, Nicola; University of Bern, Institute of Social and Preventive Medicine |
| Keywords:                     | GYNAECOLOGY, MICROBIOLOGY, OBSTETRICS, EPIDEMIOLOGY, Epidemiology < INFECTIOUS DISEASES                                                                                                                                                                                                                                                                                                                                                                                                                                                                                                                                                                                                                                                                                      |
|                               |                                                                                                                                                                                                                                                                                                                                                                                                                                                                                                                                                                                                                                                                                                                                                                              |

SCHOLARONE™  
Manuscripts

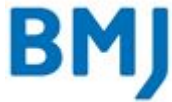

I, the Submitting Author has the right to grant and does grant on behalf of all authors of the Work (as defined in the below author licence), an exclusive licence and/or a non-exclusive licence for contributions from authors who are: i) UK Crown employees; ii) where BMJ has agreed a CC-BY licence shall apply, and/or iii) in accordance with the terms applicable for US Federal Government officers or employees acting as part of their official duties; on a worldwide, perpetual, irrevocable, royalty-free basis to BMJ Publishing Group Ltd ("BMJ") its licensees and where the relevant Journal is co-owned by BMJ to the co-owners of the Journal, to publish the Work in this journal and any other BMJ products and to exploit all rights, as set out in our [licence](#).

The Submitting Author accepts and understands that any supply made under these terms is made by BMJ to the Submitting Author unless you are acting as an employee on behalf of your employer or a postgraduate student of an affiliated institution which is paying any applicable article publishing charge ("APC") for Open Access articles. Where the Submitting Author wishes to make the Work available on an Open Access basis (and intends to pay the relevant APC), the terms of reuse of such Open Access shall be governed by a Creative Commons licence – details of these licences and which [Creative Commons](#) licence will apply to this Work are set out in our licence referred to above.

Other than as permitted in any relevant BMJ Author's Self Archiving Policies, I confirm this Work has not been accepted for publication elsewhere, is not being considered for publication elsewhere and does not duplicate material already published. I confirm all authors consent to publication of this Work and authorise the granting of this licence.

1  
2  
3 1 **Adverse pregnancy and birth outcomes associated with *Mycoplasma hominis*, *Ureaplasma***  
4  
5 2 ***urealyticum* and *Ureaplasma parvum*: A systematic review and meta-analysis**  
6

7 3  
8  
9 4 **Corresponding author:** Prof. N Low, MD MSc FFPH, Institute of Social and Preventive  
10  
11 5 Medicine, Mittelstrasse 43, University of Bern, CH-3012 Bern, Switzerland. Tel: +41 30 684 30  
12  
13 6 92; Email: [nicola.low@ispm.unibe.ch](mailto:nicola.low@ispm.unibe.ch). ORCID 0000-0003-4817-8986  
14  
15

16 7  
17  
18 8 Marinjho Emely Jonduo,<sup>1</sup> Lisa Michelle Valley,<sup>1,2</sup> Handan Wand,<sup>3</sup> Emma Louise Sweeney,<sup>4</sup>  
19  
20 9 Dianne Egli-Gany,<sup>5</sup> John Martin Kaldor,<sup>1</sup> Andrew John Valley<sup>1,2</sup> and Nicola Low,<sup>5</sup>  
21  
22

23 10  
24  
25 11 <sup>1</sup> Public Health Interventions Research Program, The Kirby Institute, University of New South  
26  
27 12 Wales, Sydney, NSW 2052, Australia.  
28  
29

30 13 <sup>2</sup> Sexual and Reproductive Health Unit, Papua New Guinea Institute of Medical Research,  
31  
32 14 Goroka, Eastern Highlands Province 441, Papua New Guinea.  
33

34 15 <sup>3</sup> Biostatistics and Databases program, The Kirby Institute, University of New South Wales,  
35  
36 16 Sydney, New South Wales, Australia.  
37  
38

39 17 <sup>4</sup> The University of Queensland Center for Clinical Research, Brisbane, Queensland 4029,  
40  
41 18 Australia.  
42

43 19 <sup>5</sup> Institute of Social and Preventive Medicine, University of Bern, CH-3012 Bern, Switzerland.  
44  
45

46 20  
47  
48 21 **Word count: 4000 (max 4000)**  
49

50 22 **Conflict of interest:** The authors report no conflict of interest.  
51

52  
53 23 **Study funding:** Australian National Health & Medical Research Council (NHMRC);  
54  
55 24 DFID/MRC/Wellcome Trust Joint Global Health Trials; Swiss National Science Foundation.  
56  
57

58 25  
59  
60  
For peer review only - <http://bmjopen.bmj.com/site/about/guidelines.xhtml>

## 26 ABSTRACT

### 27 Objectives

28 *Mycoplasma hominis*, *Ureaplasma urealyticum* and *Ureaplasma parvum* (genital mycoplasmas)  
29 commonly colonise the urogenital tract in pregnant women. This systematic review aims to  
30 investigate the role of genital mycoplasmas in adverse pregnancy and birth outcomes, alone or in  
31 combination with bacterial vaginosis.

32 **Data sources and eligibility:** We searched Embase, Medline and CINAHL databases from  
33 January 1971 to February 2021. Eligible studies tested for any of the three genital mycoplasmas  
34 during pregnancy and reported on preterm birth (PTB), low birth weight (LBW), premature  
35 rupture of membranes (PROM), spontaneous abortion (SA) and/or perinatal death PND, and were  
36 cohort, cross-sectional or case-control studies, or randomised controlled trials.

37 **Study appraisal and synthesis:** Two reviewers independently screened titles and abstract, read  
38 potentially eligible full texts and extracted data. Two reviewers independently assessed risks of  
39 bias using published checklists. Random effects meta-analysis was used to estimate summary  
40 odds ratios (OR, with 95% confidence intervals, and prediction intervals). Multivariable and  
41 stratified analyses were synthesised descriptively.

### 42 Results

43 Of 57/1194 included studies, 39 were from high-income countries. In meta-analysis of unadjusted  
44 ORs, *M. hominis* was associated with PTB, PROM, LBW and PNM, but not SA. *U. urealyticum*  
45 was associated with PTB, PROM, SA and PNM. *U. parvum* was associated with PTB, PROM  
46 and SA. Nine of 57 studies reported any multivariable analysis. In two studies, analyses stratified  
47 by BV status showed that *M. hominis* and *U. parvum* were more strongly associated with PTB in  
48 the presence than in the absence of BV. The most frequent source of bias was a failure to control  
49 for confounding.

### 50 Conclusions

1  
2  
3 51 The currently available literature does not allow conclusions about the role of mycoplasmas in  
4  
5 52 adverse pregnancy and birth outcomes, alone or with co-existing bacterial vaginosis. Future  
6  
7 53 studies that consider genital mycoplasmas in the context of the vaginal microbiome are needed.  
8  
9

10 54 **PROSPERO published date:** 01 Nov 2018; **registration number:** CRD42016050962  
11

12 55 **Strengths and limitations**  
13

- 14  
15 56 • We followed a published protocol with predefined outcomes and statistical analysis plan  
16  
17 57 • Two reviewers independently selected the studies, extracted data and performed risk of bias  
18  
19 58 assessment  
20  
21 59 • Evidence for heterogeneity was examined and described both visually and statistically  
22  
23  
24 60 • We triangulated findings across study designs  
25  
26 61 • Restriction to studies in English and German might have missed eligible articles.  
27  
28  
29 62

## 63 INTRODUCTION

64 *Mycoplasma hominis*, *Ureaplasma parvum* and *Ureaplasma urealyticum*, referred to together as  
65 genital mycoplasmas, commonly colonise the urogenital tract in women, and are often found  
66 together.[1, 2] These species do not appear to cause symptoms or harmful effects in nonpregnant  
67 women.[2, 3] Plummer et al. found that *M. hominis* was associated with abnormal vaginal  
68 discharge only in nonpregnant women who also had BV.[2] Colonisation with a genital  
69 mycoplasma has, however, been reported in many studies to be associated with several adverse  
70 pregnancy outcomes[4, 5] including preterm birth (PTB); low birth weight (LBW); premature  
71 rupture of membranes (PROM) and preterm premature rupture of the membranes (PPROM),  
72 spontaneous abortion (SA), and perinatal death (PND).[1, 6-12] Several research groups have  
73 suggested that *M. hominis*, whilst considered a part of the normal vaginal microbiota, might only  
74 be pathogenic in the presence of bacterial vaginosis (BV) as part of a disturbed vaginal  
75 microbiota.[4, 5, 13] There are, however, inconsistencies across studies, uncertainty about the  
76 interplay between specific organisms and the vaginal microbiota in general,[14-16] and  
77 differences in recommendations for testing and treatment.[13, 17]

78 Technological advances in the molecular detection of multiple vaginal and endocervical  
79 organisms in the same assay[18, 19] should make it easier to study the role of genital  
80 mycoplasmas in adverse pregnancy outcomes. Methods to distinguish between *U. urealyticum*  
81 and *U. parvum* were not widely available before 2000,[20, 21] and unspiciated *Ureaplasma* spp.  
82 detected by culture were reported together as *U. urealyticum*.[18] Narrative reviews have not  
83 fully elucidated whether the apparent pathogenicity of genital mycoplasmas in pregnancy is  
84 associated with a particular organism, concurrent infection with multiple genital mycoplasmas  
85 and other lower genital tract organisms, or confounding by other demographic, clinical and  
86 behavioural factors.[4, 5, 13] A systematic and quantitative assessment of these questions is  
87 therefore timely.

## 88 OBJECTIVES

89 The primary objective of this study was to investigate the associations between *M. hominis*,  
90 *U. urealyticum* and/or *U. parvum* and the risk of PTB, alone and in combination with BV.

91 Secondary objectives were to investigate associations between each genital mycoplasma and  
92 LBW, PROM, SA and PND.

## 93 METHODS

94 This systematic review followed a registered protocol (PROSPERO CRD42016050962),[22]  
95 which covers multiple organisms, for which findings are reported elsewhere, including *Neisseria*  
96 *gonorrhoeae*[23] and *M. genitalium*. [24] We report our findings using the Preferred Reporting  
97 Items for Systematic Reviews and Meta-Analyses (PRISMA 2020) (A.1)[25] and methodological  
98 guidance about systematic reviews of observational studies (MOOSE) (A.2).[26] Patients or the  
99 public were not involved in the design, or conduct, or reporting, or dissemination plans of our  
100 research.

### 101 Eligibility criteria, information sources and search strategy

102 Studies were eligible if they reported on pregnant women with and without *M. hominis*, *U.*  
103 *urealyticum* and/or *U. parvum* and included one or more of the outcomes: PTB, LBW, PROM  
104 (preterm or term), SA and PND. Standard definitions were used for all outcomes (PTB, delivery  
105 at <37 weeks gestation; LBW, birthweight <2.5kg; PROM, rupture of membranes prior to onset  
106 of labour; PPROM, premature rupture at <37 weeks gestation; SA, delivery at <20 weeks  
107 gestation; stillbirth (death after >20 weeks in utero); perinatal or neonatal death (PND, stillbirths  
108 and death <28 days after birth), but we used author's definitions if necessary.[22] We excluded  
109 articles published before 2000 if they reported unspiciated *U. urealyticum* alone. If they reported  
110 on *M. hominis* and *U. urealyticum* we included the study but did not extract results about



1  
2 111 *U. urealyticum*. We included cohort, cross-sectional and case-control studies, and randomised  
3  
4  
5 112 controlled trials.

6  
7  
8 113 We searched Medline, Embase, Cumulative Index to Nursing and Allied Health Literature  
9  
10 114 (CINAHL) for literature published from January 1971 to February 2021. We searched reference  
11  
12 115 lists of included studies for additional potentially eligible studies but did not search grey literature  
13  
14  
15 116 sources. The searches did not include language restrictions, but we only read the full-text of  
16  
17 117 articles in English and German (languages spoken by the review team). The full search strategy is  
18  
19 118 in the online supporting information (A.3). We used Endnote (V7, Thomson Reuters) to import,  
20  
21 119 de-duplicate and manage retrieved records.

## 22 120 **Study selection and data extraction**

23  
24  
25  
26  
27  
28 121 Two reviewers (MJ, LV) independently screened titles and abstracts, and read the full text of  
29  
30 122 potentially eligible papers. Disparities were resolved by discussion or by a third reviewer (DEG).  
31  
32 123 Where multiple reports presented data from the same study population, we identified a primary  
33  
34 124 record with the most detailed information but included data from other publications. Two  
35  
36 125 reviewers (MJ, LV) extracted data independently into an online database (Research Electronic  
37  
38 126 Data Capture, REDCap, Vanderbilt University, Tennessee). Disparities were resolved by  
39  
40 127 discussion or by a third reviewer (DEG, NL or ES).

## 41 128 **Data extraction**

42  
43  
44  
45  
46  
47  
48 129 Each reviewer extracted data about the study design, study setting and sociodemographic  
49  
50 130 characteristics, specimen type and timing, laboratory tests, organisms tested for, outcomes  
51  
52 131 reported, raw numbers of participants with and without each outcome and organism, where  
53  
54 132 available, or author reported effect size and 95% confidence intervals (CI). They extracted the  
55  
56 133 adjusted odds ratio (aOR, 95% CI) and recorded variables included in multivariable models,  
57  
58 134 where possible. If results were described for more than one anatomical site, we used the

1  
2 135 following order of preference: vaginal or cervical swabs, amniotic fluid, placenta, urine, blood.

3  
4 136 Where more than one diagnostic method, we used data from nucleic acid amplification test

5  
6  
7 137 (NAAT), then bacterial culture, followed by ELISA. The data underlying this article are available

8  
9 138 in the article and in its online supplementary material.

### 12 139 **Risk of bias assessments**

14  
15 140 Two reviewers (MJ, LV) appraised each article independently, using checklists published by the

16  
17 141 UK National Institute for Health and Care Excellence (NICE).[27, 28] A qualitative judgement

18  
19 142 about internal and external validity was summarised as: all or most checklist criteria fulfilled

20  
21 143 (++), some criteria fulfilled (+), or few or no criteria fulfilled (-). We used funnel plots and the

22  
23 144 Egger test[29] to investigate evidence for publication or small study biases across studies for

24  
25 145 outcomes reported by more than nine studies.

### 28 29 30 146 **Data synthesis**

31  
32  
33 147 We used Stata 14.0 (StataCorp, College Station, TX) for all analyses. We used the OR, with 95%

34  
35 148 CI as the measure of association for all study designs, since the OR and risk ratio are similar for

36  
37 149 rare outcomes, as is the case for most of the outcomes of interest. This allowed us to analyse

38  
39 150 findings from different study designs together, where appropriate.[30] We constructed 2x2 tables

40  
41 151 to calculate of the OR or used the authors' calculation when raw data were unavailable. We

42  
43 152 added 0.5 to each cell in the table if there were zero observations in any cell. For each exposure-

44  
45 153 outcome pair, we examined forest plots of univariable associations visually, displaying the OR

46  
47 154 (with 95% CI) and the  $I^2$  statistic, to examine between study heterogeneity. We used a random

48  
49 155 effects model to estimate a summary OR (95% CI), which is the average effect across all

50  
51 156 included studies,[31] allowing for the differences in study designs, populations and settings. We

52  
53 157 stratified studies by study design in forest plots and, where the stratified estimates were

54  
55 158 compatible, we estimated the overall estimated OR with its prediction interval, to show the range

56  
57 159 of effect sizes across all settings of included studies.[31] We then examined evidence for from

1  
2 160 studies that also reported on BV. We described findings from analyses that were stratified by BV  
3  
4 161 status, or in studies with a multivariable analysis, we reported the aOR, controlling for BV and  
5  
6  
7 162 other measured confounding variables.[26]  
8  
9

## 10 163 **RESULTS**

### 13 164 **Study selection**

16 165 Our searches identified 1194 records and we screened 641, after exclusion of duplicates (Figure  
17  
18 S1). Of 215 full-text articles, we included 57 studies. Articles excluded based on title and abstract  
19 166  
20 mostly concerned neonatal respiratory outcomes, chorioamnionitis and infertility. Exclusion of  
21 167  
22 full-text articles had various reasons (Figure S1).  
23 168

### 26 169 **Study characteristics**

29 170 Of the 52 studies, we identified 42 reporting on *M. hominis* (proportion detected <1-70%), 31  
30  
31 reporting on *U. urealyticum* (proportion detected 0-91%) and 12 reporting on *U. parvum* (2–  
32 171  
33 100%) and median sample size 250, interquartile range, IQR 145-613, range 37 [32] to 9105 [33]  
34 172  
35 (Table 1, Supporting information Table S1). There were 26 cohort studies (Table S3.1),[1, 6, 8,  
36 173  
37 12, 15, 33-53] 25 case-control studies (Table S3.2)[7, 9-11, 32, 54-73] and six cross-sectional  
38 174  
39 studies (Table S3.3).[74-79] Most studies were from high-income settings (39/57) (Table S4.1,  
40 175  
41 S4.2, S4.3); ethnicity was reported in 24 studies, and maternal smoking in 12 (Table S5.1, S5.3,  
42 176  
43 S5.3). Most studies (54/57) stated the timing of specimen collection, and all described the  
44 177  
45 laboratory tests used (Table S1): 29/57 bacterial culture only; 24/57 NAAT only (Table 1, Table  
46 178  
47 S1). Three studies reported on antimicrobial susceptibilities[8, 50] with *M. hominis* resistant to  
48 179  
49 erythromycin, clarithromycin, tetracycline and *U. urealyticum* resistant to ciprofloxacin,  
50 180  
51 tetracycline and erythromycin.[6, 50]  
52 181  
53  
54  
55  
56  
57  
58  
59  
60

182 **Table 1.** Summary of characteristics of studies included in the systematic review

| Characteristic                    | Total          | <i>M. hominis</i> | <i>U. urealyticum</i> | <i>U. parvum</i> |
|-----------------------------------|----------------|-------------------|-----------------------|------------------|
| Number of studies, n*             | 57             | 42                | 31                    | 12               |
| Study design, n                   |                |                   |                       |                  |
| Cohort                            | 26             | 23                | 16                    | 9                |
| Case-control                      | 25             | 13                | 12                    | 1                |
| Cross-sectional                   | 6              | 6                 | 3                     | 2                |
| Number of women, total            | 36,992         | 28,697            | 16,609                | 9,663            |
| (median; IQR)                     | (250; 145-613) | (250; 159-759)    | (216; 145-613)        | (376; 195-986)   |
| Study setting, income category, n |                |                   |                       |                  |
| High income                       | 38             | 27                | 20                    | 10               |
| Upper-middle income               | 9              | 8                 | 4                     | 2                |
| Lower middle-income or low        | 3              | 2                 | 1                     | 0                |
| Not reported                      | 11             | 5                 | 6                     | 0                |
| Outcomes reported, n              |                |                   |                       |                  |
| Preterm birth                     | 43             | 29                | 27                    | 11               |
| Low birth weight                  | 8              | 6                 | 2                     | 1                |
| Premature ruptures of membrane    | 15             | 11                | 11                    | 2                |
| Spontaneous abortion              | 11             | 10                | 4                     | 2                |
| Perinatal death                   | 11             | 10                | 2                     | 1                |
| Specimen type, n†                 |                |                   |                       |                  |
| Endocervical swab                 | 24             | 18                | 12                    | 4                |

|    |                                     |    |    |    |    |
|----|-------------------------------------|----|----|----|----|
| 1  |                                     |    |    |    |    |
| 2  |                                     |    |    |    |    |
| 3  | Vaginal swab                        | 15 | 10 | 11 | 5  |
| 4  | Urine                               | 1  | 1  | 0  | 0  |
| 5  |                                     |    |    |    |    |
| 6  | Amniotic fluid                      | 9  | 6  | 5  | 2  |
| 7  |                                     |    |    |    |    |
| 8  | Placental membrane                  | 8  | 7  | 3  | 2  |
| 9  | Diagnostic method*                  |    |    |    |    |
| 10 |                                     |    |    |    |    |
| 11 | NAAT                                | 24 | 13 | 20 | 10 |
| 12 |                                     |    |    |    |    |
| 13 | Culture                             | 29 | 27 | 7  | 0  |
| 14 |                                     |    |    |    |    |
| 15 | Culture and NAAT                    | 3  | 1  | 3  | 2  |
| 16 | Other**                             | 1  | 1  | 0  | 0  |
| 17 |                                     |    |    |    |    |
| 18 | Bacterial vaginosis assessed, n     | 10 | 8  | 3  | 1  |
| 19 |                                     |    |    |    |    |
| 20 | Reported presence of STI, n         | 20 | 14 | 8  | 3  |
| 21 |                                     |    |    |    |    |
| 22 | Reported on smoking status, n       | 13 | 7  | 6  | 4  |
| 23 |                                     |    |    |    |    |
| 24 | Reported on Multiple pregnancy, n*‡ |    |    |    |    |
| 25 | Excluded                            | 26 | 18 | 15 | 6  |
| 26 |                                     |    |    |    |    |
| 27 | Included                            | 8  | 5  | 4  | 3  |

29 183 **Abbreviations:** IQR, interquartile range; STI, sexually transmitted infection

30 184 \* The total number of studies included is 57. The totals for each organism sum to more than 57 because one study might have reported on more than  
31 one organism;  
32 185

33 186 † One study used both urine and endocervical swab;

34 187 \*\*ELISA (with NAAT/ Culture)

35 188 ‡ 22 studies included women with multiple pregnancy

36 189

37

38

39

40

41

42

1  
2  
3 190 Of the 57 studies, 37 reported on a single microorganism (*M. hominis*, n=27; *U. urealyticum*,  
4  
5 191 n=10); 13 included two genital mycoplasmas (*M. hominis* and *U. urealyticum*, n=9; ureaplasmas,  
6  
7 192 n=4) and seven reported on all three organisms (Figure S2). Only two studies presented findings  
8  
9 193 for combinations of more than one genital mycoplasma; [6, 47] the rest presented data separately,  
10  
11 194 even if they had tested for more than one organism. Ten studies reported on the presence of  
12  
13 195 BV; [33, 36, 43, 47, 51, 53, 58, 59, 65, 72] we report the findings of these studies in the relevant  
14  
15 196 section of the results for each genital mycoplasma. Twenty-three studies reported on other  
16  
17 197 sexually transmitted infections (Table S5.1, S5.3, S5.3), including 2/23 reporting on syphilis,  
18  
19 198 5/23 gonorrhoea, 14/23 chlamydia, 5/23 *M. genitalium*, 5/23 trichomonas, and 2/23 HIV.  
20  
21  
22  
23  
24 199 Table 2 summarises the meta-analyses of each exposure-outcome pair and information about  
25  
26 200 genital mycoplasmas in the presence or absence of BV. In most meta-analyses, heterogeneity was  
27  
28 201 low or moderate. Summary findings from different study designs were compatible, so we present  
29  
30 202 summary measures across all study designs (Figures 1, 2, and S3.1-S5.3).  
31  
32  
33  
34  
35  
36  
37  
38  
39  
40  
41  
42  
43  
44  
45  
46  
47  
48  
49  
50  
51  
52  
53  
54  
55  
56  
57  
58  
59  
60

203 **Table 2** Summary estimates, by outcome and organism, from random effects meta-analysis of unadjusted odds ratios, for associations between  
 204 genital mycoplasmas and adverse birth outcomes, and summary of multivariable and analyses that stratify the main association by BV status

| Adverse outcome<br><i>Organism</i>   | No. of studies | Summary estimate*<br>OR (95% CI) | I <sup>2</sup> , % | Prediction interval | Any multivariable analysis†  | Analyses of genital mycoplasmas and adverse birth outcomes in presence and absence of BV‡                            |
|--------------------------------------|----------------|----------------------------------|--------------------|---------------------|------------------------------|----------------------------------------------------------------------------------------------------------------------|
| <b>Preterm birth</b>                 |                |                                  |                    |                     |                              |                                                                                                                      |
| <i>M. hominis</i>                    | 30             | 1.87 (1.49, 2.34)                | 29.2               | 0.98, 3.55          | 5 studies[1, 44, 45, 48, 61] | MH+,BV+/PTB OR 1.58 (95% CI 0.94, 2.77); MH+,BV-/PTB 1.18 (0.91, 1.52)[33]                                           |
| <i>U. urealyticum</i>                | 27             | 1.84 (1.33, 2.54)                | 69.2               | 0.53, 6.36          | 5 studies[1, 41, 47, 65, 74] | UU+,BV+/PTB 0.47 (0.09, 3.31); UU+,BV-/PTB 1.15 (0.67, 1.98)[65]                                                     |
| <i>U. parvum</i>                     | 11             | 1.59 (1.12, 2.27)                | 57.4               | 0.60, 4.26          | 2 studies[1, 47]             | UP-,BV-/PTB; UP+,BV-/PTB Adjusted 1.6 (1.2, 2.1); UP-,BV+/PTB aOR 1.6 (1.1, 2.3); UP+,BV+/PTB aOR 2.6 (1.7, 4.0)[47] |
| <b>Premature rupture of membrane</b> |                |                                  |                    |                     |                              |                                                                                                                      |
| <i>M. hominis</i>                    | 11             | 1.99 (1.43, 2.79)                | 0.0                | 1.36, 2.90          | 1 study[61]                  | None reported                                                                                                        |
| <i>U. urealyticum</i>                | 11             | 4.27 (1.83, 9.98)                | 87.3               | 0.27, 68.07         | 0 studies                    |                                                                                                                      |
| <i>U. parvum</i>                     | 2              | 3.19 (1.25, 8.15)                | 0.0                | NC                  | 0 studies                    |                                                                                                                      |
| <b>Low birth weight</b>              |                |                                  |                    |                     |                              | None reported                                                                                                        |
| <i>M. hominis</i>                    | 6              | 1.81 (1.29, 2.52)                | 0.0                | 1.12, 2.90          | 1 study[34]                  |                                                                                                                      |
| <i>U. urealyticum</i>                | 2              | 2.24 (1.16, 4.33)                | 0.0                | NC                  | 0 studies                    |                                                                                                                      |
| <i>U. parvum</i>                     | 0              | NA                               | NA                 | NA                  | 0 studies                    |                                                                                                                      |
| <b>Spontaneous abortion</b>          |                |                                  |                    |                     |                              | None reported                                                                                                        |
| <i>M. hominis</i>                    | 10             | 1.06 (0.49, 2.30)                | 54.4               | 0.12, 9.68          | 0 studies                    |                                                                                                                      |

|                        |   |                    |      |             |               |
|------------------------|---|--------------------|------|-------------|---------------|
| <i>U. urealyticum</i>  | 4 | 1.74 (1.02, 2.95)  | 0.0  | 0.54, 5.58  | 0 studies     |
| <i>U. parvum</i>       | 2 | 1.65 (0.67, 4.05)  | 0.0  | NC          | 0 studies     |
| <b>Perinatal death</b> |   |                    |      |             | None reported |
| <i>M. hominis</i>      | 9 | 2.70 (1.31, 5.57)  | 30.4 | 1.31, 13.94 | 0 studies     |
| <i>U. urealyticum</i>  | 2 | 9.50 (2.99, 30.13) | 0.0  | NC          | 0 studies     |
| <i>U. parvum</i>       | 1 | NA                 |      |             | 0 studies     |

205 **Abbreviations:** aOR, adjusted odds ratio; BV, bacterial vaginosis; CI, confidence interval; I<sup>2</sup>, heterogeneity; MH, *Mycoplasma hominis*; NA, not

206 applicable; NC, could not be calculated; OR, odds ratio; UP, *Ureaplasma parvum*; UU, *Ureaplasma urealyticum*

207 \* Meta-analysis of unadjusted ORs, using random effects model

208 † Details for individual studies reported in Tables S5.1-5.3

209 ‡ Further details of analyses based on exclusion of other infections, stratification, or multivariable analyses in Table S7

210



## 211 Risk of bias within and across studies

212 Based on the NICE checklists,[27, 28] none of the 57 studies met all or most (++/++)  
213 checklist criteria for internal and external validity, 29 studies met some (+/+)[7, 9, 11, 15, 32,  
214 33, 36, 40, 41, 45-47, 50, 52, 56-58, 60, 62, 64, 65, 67-70, 72-74] and 17 met few or no  
215 checklist criteria (-/-)[6, 8, 10, 12, 38, 39, 42-44, 49, 53, 55, 61, 66, 71, 79] (Tables S7.1-7.3).  
216 Poor reporting of study methods meant that many items could not be assessed. In all study  
217 designs, control of confounding in most studies was poorly addressed or not addressed.  
218 Funnel plots for *M. hominis* (PTB, PROM, SA and PND), *U. urealyticum* (PTB, PROM) and  
219 *U. parvum* (PTB) did not show evidence of asymmetry (Table S2).

## 220 Associations between *M. hominis* and adverse pregnancy outcomes

221 There were 42 studies with data about *M. hominis*, reporting on 66 outcomes (Tables S3.1-  
222 S3.1). Of these, 30 included data about PTB.[1, 6, 8, 10, 15, 32, 33, 36, 38, 40, 42-46, 48, 50-  
223 54, 58, 59, 61, 66, 68, 69, 72, 73, 75] *M. hominis* was associated with PTB in meta-analysis  
224 of unadjusted ORs (19,576 women, summary OR 1.87, 95% CI 1.49, 2.34; I<sup>2</sup> 29.2%;  
225 prediction interval 0.98, 3.55) (Figure 1). Five studies reporting a univariable association  
226 between *M. hominis* and PTB conducted multivariable analyses.[1, 44, 45, 48, 61] The  
227 association was attenuated in one (aOR 1.1, 95% CI 0.5, 2.5), after controlling for obstetric  
228 factors (previous PTB, miscarriage, multiple pregnancy and cervical incompetence).[61] In  
229 two others, authors reported no association with PTB <37 weeks, but subgroup analyses  
230 showed associations with PTB <35 [1] or <33[48] weeks. In two studies, no numerical results  
231 were reported (Table S3.1). In seven studies, authors also reported on BV.[33, 36, 43, 51, 58,  
232 59, 72] In one study, the associations between *M. hominis*, BV and PTB could be examined  
233 in detail.[33] *M. hominis*, in the absence of BV, was less strongly associated with PTB (OR  
234 1.18, 95% CI 0.91, 1.52) than in the presence of BV (OR 1.58, 95% CI 0.94, 2.77).

1  
2  
3 235 [Figure 1]  
4  
5

6 236 Eleven studies included data about PROM.[6, 10, 40, 44, 45, 52, 61, 71, 73, 75, 79] *M.*  
7  
8 237 *hominis* was associated with PROM in meta-analysis of unadjusted ORs (4,303 women,  
9  
10 238 summary OR 1.99, 95% CI 1.43, 2.75;  $I^2$  0.0 %; predictive interval 1.36, 2.90) (Figure S3.1).  
11  
12 239 In one study with a multivariable analysis, the association was attenuated (aOR 1.1, 95% CI  
13  
14 240 0.3, 3.7)[61]. Six studies included data about LBW.[8, 34, 35, 49, 75, 77] *M. hominis* was  
15  
16 241 associated with LBW in meta-analysis of unadjusted ORs (2,394 new-borns, summary OR  
17  
18 242 1.81, 95% CI 1.29, 2.52;  $I^2$  0.0 %; predictive interval 1.12, 2.90) (Figure S3.2). In one study,  
19  
20 243 *M hominis* was associated with LBW in multivariable analysis, when considered as a  
21  
22 244 continuous variable (reported  $p=0.01$ ).[34] In 10 studies with data about PND,[8, 35, 40, 45,  
23  
24 245 51, 54, 55, 76, 77] meta-analysis of unadjusted ORs found an association with *M. hominis*  
25  
26 246 (3,696 women, summary OR 2.09, 95% CI 1.00, 4.37;  $I^2$  44.6%; predictive interval 0.30,  
27  
28 247 14.62) (Figure S3.3). In 10 studies with data about SA,[6, 7, 11, 35, 36, 39, 40, 51, 55, 63]  
29  
30 248 there was no association with *M. hominis* in meta-analysis of unadjusted ORs (4,531 women,  
31  
32 249 summary OR 1.06, 95% CI 0.49, 2.30 ;  $I^2$  54.4%; predictive interval 0.12, 9.68) (Figure  
33  
34 250 S3.4). No results of multivariable analyses were reported for PND or SA.

### 251 **Associations between *U. urealyticum* and adverse pregnancy outcomes**

252 Thirty-one studies included data about *U. urealyticum* and 46 outcomes. There were 27  
253 studies with data about PTB.[1, 6, 10, 12, 15, 32, 38, 40, 41, 46-48, 50, 52, 53, 56, 57, 60, 62,  
254 64, 65, 67, 70, 73-75, 78] In meta-analysis of unadjusted ORs, *U. urealyticum* was associated  
255 with PTB (12,234 women, summary OR 1.84, 95% CI 1.33, 2.54;  $I^2$  69.2%; predictive  
256 interval 0.53, 6.36) (Figure 2). Five studies reported multivariable analyses.[1, 41, 47, 65, 74]  
257 In one, multivariable and univariable associations were similar (aOR 1.4, 95% CI 0.8,  
258 2.2).[47] In four, no numerical results were reported.[1] In one study with information about

1  
2  
3 259 BV, there was no strong evidence of an association between *U. urealyticum* and PTB in the  
4  
5 260 presence (OR 0.47, 95% CI 0.09, 3.31) or absence of BV (OR 1.15, 95% CI 0.67, 1.98).[65]

7  
8  
9 261 [Figure 2]

10  
11 262 For all other outcomes, data were only available for meta-analysis of unadjusted ORs. *U.*  
12  
13 263 *urealyticum* was associated with: PROM in 12 studies[6, 10, 37, 50, 52, 60, 62, 67, 71, 73,  
14  
15 264 74, 79] (3,676 participants, summary OR 4.27, 95% CI 1.83, 9.98; I<sup>2</sup> 87.3%; predictive  
16  
17 265 interval 0.27, 68.07) (Figure S4.1); LBW in two studies[12, 65] (506 participants, OR  
18  
19 266 2.24, 95% CI 1.16, 4.33; I<sup>2</sup> 0.0%) (Figure S4.2); SA in four studies[6, 7, 9, 40] (2,140  
20  
21 267 women, summary OR 1.74, 95% CI 1.02, 2.95; I<sup>2</sup> 0.0%; predictive interval 0.54, 5.58)  
22  
23 268 (Figure S4.3); and PND in two studies[40, 60] (1,043 participants, summary OR 9.50, 95%  
24  
25 269 CI 2.99, 30.13; I<sup>2</sup> 0.0%) (Figure S4.4).

### 270 **Associations between *U. parvum* and adverse pregnancy outcomes**

271 Twelve studies included data about associations between *U. parvum* and 17 outcomes. Eleven  
272 studies reported PTB.[1, 10, 12, 15, 38, 40, 46, 47, 56, 64, 78] In meta-analysis of unadjusted  
273 ORs, *U. parvum* was associated with PTB (8,002 women, summary OR 1.59, 95% CI 1.12,  
274 2.72; I<sup>2</sup> 57.4%; predictive interval 0.60, 4.26) (Supplementary Figure S5.1). In one study,[47]  
275 a multivariable analysis found a stronger association with PTB when both *U. parvum* and BV  
276 were present (aOR 2.6, 95% CI 1.7, 4.0) than when *U. parvum* was present without BV (aOR  
277 1.6, 95% CI 1.2, 2.1), when compared with women with neither infection. In one, no  
278 numerical results were reported.[1]

279 [Figure 3]

280 For all other outcomes, data were only available for meta-analysis of unadjusted ORs. *U.*  
281 *parvum* was associated with PROM in two studies[10, 40] (946 participants, OR 3.19, 95%

1  
2  
3 282 CI 1.25, 8.15;  $I^2$  0.0%) (Figure S5.2) and with SA in two studies[7, 40] (986 participant,  
4  
5 283 summary OR 1.65, 95% CI 0.67, 4.05;  $I^2$  0.0%) (Figure S5.3). One study reported on LBW  
6  
7 284 (22 participants, 1 event, OR 0.56, 95% CI 0.01, 12.75)[12] and one on PND (872 women, 1  
8  
9 285 event, OR 2.79).[40]  
10  
11  
12

## 13 286 **DISCUSSION**

### 16 287 **Principal findings**

19 288 This systematic review and meta-analysis included 57 studies about associations between  
20  
21 289 *M. hominis*, *U. urealyticum* and *U. parvum* and five adverse pregnancy outcomes. Only 6/57  
22  
23 290 studies reported any multivariable analysis. In 51 studies, meta-analyses of unadjusted ORs  
24  
25 291 found that *M. hominis* was associated with an increase in PTB, PROM, LBW, and PND,  
26  
27 292 *U. urealyticum* with an increase in PTB, PROM, SA, and PND, and *U. parvum* with an  
28  
29 293 increase in PTB and PROM. In three studies from which data about both genital  
30  
31 294 mycoplasmas and BV could be extracted; *M. hominis* and *U. parvum* were less strongly  
32  
33 295 associated with PTB in the absence of BV than in the presence of BV and no association with  
34  
35 296 *U. urealyticum* was found in the presence or absence of BV.  
36  
37  
38  
39  
40

### 41 297 **Strengths and weaknesses of the study**

44 298 The strengths of this systematic review and meta-analysis are first, that we followed a  
45  
46 299 published protocol[22] with predefined outcomes and statistical analysis plan. Study  
47  
48 300 selection, data extraction and risk of bias assessment were undertaken independently by two  
49  
50 301 reviewers, to reduce subjectivity. Second, we examined evidence for heterogeneity visually  
51  
52 302 and statistically, and calculated prediction intervals that show the variability in estimates  
53  
54 303 from different studies.[31] Third, we triangulated findings across study designs;[23, 26]  
55  
56 304 despite the different potential sources of bias, the summary estimates were compatible and we  
57  
58  
59  
60

1  
2  
3 305 judged it reasonable to combine effect estimates.[30] There were also limitations in the  
4  
5 306 design of the review. Despite a predefined search strategy, with broad search terms, we might  
6  
7 307 have missed relevant studies, particularly by restriction to languages not spoken fluently by  
8  
9 308 the authors. There were too few studies to conduct all the planned sensitivity analyses by  
10  
11 309 organism, but we described all studies that allowed stratification by BV status.  
12  
13  
14

### 15 310 **Comparison with existing literature and interpretation**

16  
17  
18 311 We found a systematic review about genital mycoplasmas that included studies published in  
19  
20 312 English or Chinese up to March 2020.[80] The focus of the review was on infertility,  
21  
22 313 however, and limited search terms for studies about adverse pregnancy outcomes identified  
23  
24 314 only 11 of the 57 studies that we included, making comparison difficult.  
25  
26  
27

28  
29 315 The findings from this systematic review cannot be interpreted as showing causal  
30  
31 316 associations between colonisation with *M. hominis*, *U. urealyticum*, or *U. parvum* in  
32  
33 317 pregnancy and some adverse pregnancy outcomes. Whilst meta-analysis of unadjusted  
34  
35 318 associations increases precision, the confounder adjusted estimates could not be summarised.  
36  
37 319 Most studies in this systematic review did not control for confounding by either  
38  
39 320 sociodemographic characteristics, or co-infection with another organism or BV. Specific  
40  
41 321 investigation of the role of co-infection with BV,[4, 5] could only be studied in a small  
42  
43 322 number of studies. Rittenschober-Böhm *et al.*, studied more than 4000 women in  
44  
45 323 Germany.[47] They found univariable associations between both *U. parvum* (OR 1.7, 95% CI  
46  
47 324 1.3, 2.2) and *U. urealyticum* (1.4, 95% CI 0.9, 2.3) and spontaneous PTB. A strength of their  
48  
49 325 study is the multivariable analysis, controlling for age, smoking, history of PTB and other  
50  
51 326 infections. For *U. parvum*, the association with PTB was stronger when both BV and *U.*  
52  
53 327 *parvum* were present than for *U. parvum* alone. The authors did not analyse the association  
54  
55 328 with *U. urealyticum* further. Hillier *et al.*, investigated the association between *M. hominis*  
56  
57  
58  
59  
60

1  
2  
3 329 and PTB of LBW infants in more than 10,000 women in the USA.[33] The association was  
4  
5 330 stronger in the presence (1.58, 95% CI 0.94, 2.77) than absence (1.18, 95% CI 0.91, 1.52) of  
6  
7 331 BV, but confidence intervals for both estimates include the null value. Hillier *et al.* also  
8  
9 332 reported a stronger association with PTB when *M. hominis* was present with Bacteroides and  
10  
11 333 BV (OR 2.1, 95% CI 1.5, 3.0). The authors did not, however, control for any other  
12  
13 334 confounding factors.  
14  
15  
16

17  
18 335 Several of the limitations that we found in our review apply to systematic reviews of  
19  
20 336 observational studies in general. Most included studies did not set out to study our review  
21  
22 337 question and have small sample sizes. We extracted most data about genital mycoplasmas,  
23  
24 338 our exposures of interest, from tables of covariates. Differences in the performance  
25  
26 339 characteristics of diagnostic methods might have resulted in misclassification of infection  
27  
28 340 status. Bacteriological culture has been considered the gold standard for the identification of  
29  
30 341 genital mycoplasmas, but problems can arise from their fastidious growth requirements and a  
31  
32 342 lack of reliable media. Commercialised kits for both culture and NAAT diagnosis are less  
33  
34 343 laborious and have greater sensitivity and specificity compared with earlier in-house  
35  
36 344 approaches.[81, 82] Sample integrity is also important and greatly influenced by sample  
37  
38 345 collection methods (e.g. type of swab, transport medium), transportation (e.g. cold chain  
39  
40 346 maintenance) and storage (e.g. duration and temperature at which kept in long-term storage).  
41  
42 347 It was not possible to account for differences in anatomical sampling site that may have  
43  
44 348 affected detection in individual studies, e.g. *M. hominis* is more commonly isolated in the  
45  
46 349 lower genital tract whilst *Ureaplasma* spp. colonise the upper genital tract.[83] Other  
47  
48 350 limitations include misclassification, for example, gestational age was assessed by obstetric  
49  
50 351 ultrasound in only one third of studies and inconsistency in the timing during pregnancy of  
51  
52 352 sampling for genital mycoplasmas.  
53  
54  
55  
56  
57  
58  
59  
60

1  
2  
3 353 The specificity of associations between different genital mycoplasmas and adverse  
4  
5 354 pregnancy, and their mechanisms of action, remain unclear. Several studies included in this  
6  
7  
8 355 review postulate that subclinical ascending *Ureaplasma* spp. to the choriodecidual space is  
9  
10 356 followed by placental transfer into the amniotic cavity,[7, 76, 78, 84, 85] which then leads to  
11  
12 357 PROM, SA, and PND in women with high bacterial load in the upper genital tract.[85, 86]  
13  
14 358 The presence of genital mycoplasmas in the placental membranes and amniotic fluid might  
15  
16 359 have a direct effect, but they also increase levels of a variety of cytokines and other  
17  
18  
19 360 inflammatory mediators, which might be the key drivers of adverse pregnancy outcomes.[32,  
20  
21 361 37, 52, 64, 67, 85, 87] Gene sequencing methods show the complexity and diversity of the  
22  
23 362 vaginal microbiota during pregnancy [15, 16, 88] and genital mycoplasmas are often among  
24  
25 363 the most plentiful of the many bacterial species identified. In our review, one study using 16s  
26  
27 364 rRNA sequencing found a group of bacteria, including *U. parvum*, that was associated with  
28  
29 365 PTB,[15] but another smaller study did not.[56] Analysis of associations between microbial  
30  
31 366 communities and PTB was beyond the scope of our systematic review. A better  
32  
33 367 understanding of antimicrobial susceptibility is also needed. Genital mycoplasmas lack a  
34  
35 368 rigid cell wall, which allows them to evade some antibiotics. Beta-lactam antibiotics and  
36  
37  
38 369 vancomycin are considered ineffective but macrolides, fluoroquinolones and tetracyclines are  
39  
40 370 often effective.[89] In pregnant women, only macrolides should be used[90] but high rates of  
41  
42 371 antibiotic resistance are reported in many settings,[4, 91, 92] and in the absence of definitive  
43  
44 372 evidence of the benefits of treatment, cannot currently be recommended.  
45  
46  
47  
48  
49

### 50 373 **Implications**

51  
52  
53 374 The findings of this systematic review show key areas for future research. First, there is a  
54  
55 375 need for epidemiological studies that are designed specifically to investigate the  
56  
57 376 pathogenicity of vaginal and cervical organisms alone and in the context of the vaginal  
58  
59 377 microbiome. A holistic approach that includes gene sequencing and other molecular and  
60

1  
2  
3 378 culture methods to detect other endogenous and sexually transmitted organisms is  
4  
5 379 required,[14-16] taking into account the need for consistent strategies for specimen collection  
6  
7  
8 380 both in terms of the trimester(s) and the timing and types of specimens collected. These  
9  
10 381 studies should also define potential causal pathways and address confounding from factors  
11  
12 382 such as maternal age, smoking, obstetric history, co-infections and comorbidities. Second,  
13  
14 383 there is a critical need to conduct research in low- and middle-income settings where the  
15  
16 384 prevalence of sexually transmitted infections, BV and genital mycoplasma are high, and the  
17  
18 385 burden of adverse pregnancy outcomes greatest. If consistent and reproducible associations  
19  
20 386 are found in observational studies, potential interventions need to be evaluated. Randomised  
21  
22 387 controlled trials of screening and treatment for a range of vaginal and endocervical infections  
23  
24 388 in pregnancy are underway.[93, 94] If these interventions prevent adverse pregnancy  
25  
26 389 outcomes, further research will still be needed to understand the contributions of specific  
27  
28 390 organisms or combinations thereof. Multiplex assays will facilitate these research studies but  
29  
30 391 should not be used in routine clinical practice because of the risks of overdiagnosis and  
31  
32 392 overtreatment.[18, 19]

### 393 **Conclusions**

41  
42 394 In this systematic review and meta-analysis, we found that genital mycoplasmas are  
43  
44 395 associated with several different adverse pregnancy outcomes in univariable analysis only.  
45  
46 396 The currently available literature does not allow conclusions about the role of mycoplasmas  
47  
48 397 in adverse pregnancy and birth outcomes, alone or with co-existing bacterial vaginosis.  
49  
50 398 Future studies that consider genital mycoplasmas in the context of the vaginal microbiome  
51  
52 399 are needed.  
53  
54  
55  
56  
57  
58  
59  
60



1  
2  
3 400 **Authors' roles**  
4  
5

6 401 DEG, NL, AV, LV conceived the idea for the review and DEG, JK, NL, AV, LV, HW wrote  
7  
8 402 the protocol. MJ and LV did the searches, screened, and selected studies and extracted data.  
9  
10 403 DEG, NL, ES resolved disagreements. NL and HW did statistical analyses. MJ wrote the first  
11  
12 404 draft of the manuscript. MJ, NL did review and editing. All authors commented on revisions  
13  
14 405 of the manuscript and accept responsibility for its content.  
15  
16  
17

18  
19 406 **Funding**  
20  
21

22 407 NL receives funding from the Swiss National Science Foundation, project numbers 197831,  
23  
24 408 160909; LV is supported by an Australian National Health & Medical Research Council  
25  
26 409 (NHMRC) Early Career Fellowship Grant (2018-2021); MJ is a PhD research student is  
27  
28 410 supported through the Women And Newborns Trial of Antenatal Interventions and  
29  
30 411 Management (WANTAIM) trial (ISRCTN No: ISRCTN37134032), funded by  
31  
32 412 DFID/MRC/Wellcome Trust Joint Global Health Trials, Australian NHMRC Grant and  
33  
34 413 Swiss National Science Foundation. DEG received salary support from r4d programme  
35  
36 414 (Swiss Programme for Research on Global Issues for Development), grant number IZ07Z0-  
37  
38 415 160909. AV receives salary support from the Australian NHMRC, through a Career  
39  
40 416 Development Fellowship.  
41  
42  
43  
44  
45

46 417 **Ethics**  
47  
48

49 418 This study does not involve huma participants or animal subjects. All data used are only from  
50  
51 419 published data. Patients or the public were not involved in the design, or conduct, or  
52  
53 420 reporting, or dissemination plans of our research.  
54  
55  
56

57 421 **Data availability**  
58  
59

60 422 No additional or unpublished data available.

1  
2  
3 423 **Conflict of interests**  
4  
5

6 424 NL is on the advisory board of Sefunda AG, a start-up company that develops point-of-care  
7  
8  
9 425 tests for sexually transmitted infections.  
10

11  
12 426  
13  
14  
15  
16  
17  
18  
19  
20  
21  
22  
23  
24  
25  
26  
27  
28  
29  
30  
31  
32  
33  
34  
35  
36  
37  
38  
39  
40  
41  
42  
43  
44  
45  
46  
47  
48  
49  
50  
51  
52  
53  
54  
55  
56  
57  
58  
59  
60

For peer review only

427 **REFERENCES**

- 428 1. Agger WA, Siddiqui D, Lovrich SD, et al. Epidemiologic factors and urogenital infections  
429 associated with preterm birth in a midwestern U.S. population. *Obstet Gynecol*  
430 2014;124(5):969-77. doi: <https://dx.doi.org/10.1097/AOG.0000000000000470>
- 431 2. Plummer EL, Vodstrcil LA, Bodiya K, et al. Are Mycoplasma hominis, Ureaplasma  
432 urealyticum and Ureaplasma parvum Associated With Specific Genital Symptoms and  
433 Clinical Signs in Nonpregnant Women? *Clin Infect Dis* 2021
- 434 3. Horner P, Donders G, Cusini M, et al. Should we be testing for urogenital Mycoplasma  
435 hominis, Ureaplasma parvum and Ureaplasma urealyticum in men and women?—a position  
436 statement from the European STI Guidelines Editorial Board. *J Eur Acad Dermatol Venereol*  
437 2018;32(11):1845-51.
- 438 4. Capoccia R, Greub G, Baud D. Ureaplasma urealyticum, Mycoplasma hominis and  
439 adverse pregnancy outcomes. *Curr Opin Infect Dis* 2013;26(3):231-40. doi:  
440 10.1097/QCO.0b013e328360db58
- 441 5. Taylor-Robinson D, Lamont R. Mycoplasmas in pregnancy. *BJOG: Int J Obstet Gy*  
442 2011;118(2):164-74.
- 443 6. Lee MY, Kim MH, Lee WI, et al. Prevalence and Antibiotic Susceptibility of Mycoplasma  
444 hominis and Ureaplasma urealyticum in Pregnant Women. *Yonsei Med J* 2016;57(5):1271-5.  
445 doi: <https://dx.doi.org/10.3349/ymj.2016.57.5.1271>
- 446 7. Oliveira C, Oliveira M, Oliveira H, et al. Association of spontaneous abortion and  
447 Ureaplasma parvum detected in placental tissue. *Epidemiol Infect* 2020;148:e126. doi:  
448 10.1017/S0950268820001302 [published Online First: 2020/07/07]
- 449 8. Luton D, Ville Y, Luton-Sigy A, et al. Prevalence and influence of Mycoplasma hominis  
450 and Ureaplasma urealyticum in 218 African pregnant women and their infants. *Eur J Obstet*  
451 *Gynecol Reprod Biol* 1994;56(2):95-101.
- 452 9. Ahmadi A, Khodabandehloo M, Ramazanzadeh R, et al. Association between Ureaplasma  
453 urealyticum endocervical infection and spontaneous abortion in in Sanandaj, Iran. *Iran J*  
454 *Microbiol* 2014;6(6):392-97.

- 1  
2  
3 455 10. Jones HE, Harris KA, Azizia M, et al. Differing prevalence and diversity of bacterial  
4 456 species in fetal membranes from very preterm and term labor. *PLoS One* 2009;4 (12) (no  
5 457 pagination)(e8205) doi: <http://dx.doi.org/10.1371/journal.pone.0008205>  
6  
7  
8  
9 458 11. Farhadifar F, Khodabandehloo M, Ramazanzadeh R, et al. Survey on association between  
10 459 Mycoplasma hominis endocervical infection and spontaneous abortion using Polymerase  
11 Chain Reaction. *Int J Reprod Biomed* 2016;14(3):181-86.  
12  
13 460  
14  
15 461 12. Peretz A, Tameri O, Azrad M, et al. Mycoplasma and Ureaplasma carriage in pregnant  
16 462 women: the prevalence of transmission from mother to newborn. *BMC Pregnancy Childbirth*  
17 463 2020;20(1):456. doi: 10.1186/s12884-020-03147-9  
18  
19 464 13. Donders GG, Ruban K, Bellen G, et al. Mycoplasma/Ureaplasma infection in pregnancy:  
20 465 to screen or not to screen. *J Perinat Med* 2017;45(5):505-15. doi: 10.1515/jpm-2016-0111  
21  
22 466 14. van de Wijgert JH. The vaginal microbiome and sexually transmitted infections are  
23 467 interlinked: consequences for treatment and prevention. *PLoS Med* 2017;14(12):e1002478.  
24  
25 468 15. Payne MS, Newnham JP, Doherty DA, et al. A Specific Bacterial DNA Signature in the  
26 469 Vagina of Australian Women in Mid-Pregnancy Predicts High Risk of Spontaneous Preterm  
27 470 Birth (The Predict1000 Study). *Am J Obstet Gynecol* 2021 doi: 10.1016/j.ajog.2020.08.034  
28 471 [published Online First: 2020/08/31]  
29  
30 472 16. Pace RM, Chu DM, Prince AL, et al. Complex species and strain ecology of the vaginal  
31 473 microbiome from pregnancy to postpartum and association with preterm birth. *Med (N Y)*  
32 474 2021;2(9):1027-49. doi: 10.1016/j.medj.2021.06.001 [published Online First: 2021/10/08]  
33  
34 475 17. Vouga M, Greub G, Prod'homme G, et al. Treatment of genital mycoplasma in colonized  
35 476 pregnant women in late pregnancy is associated with a lower rate of premature labour and  
36 477 neonatal complications. *Clin Microbiol Infect* 2014;20(10):1074-79. doi:  
37 478 <http://dx.doi.org/10.1111/1469-0691.12686>  
38  
39 479 18. Jensen JS. To Test or Not to Test for Mycoplasma hominis and Ureaplasmas: That's (Not)  
40 480 the Question. *Clin Infect Dis* 2021;73(4):669-71. doi: 10.1093/cid/ciab065 [published Online  
41 481 First: 2021/01/26]  
42  
43  
44  
45  
46  
47  
48  
49  
50  
51  
52  
53  
54  
55  
56  
57  
58  
59  
60

- 1  
2  
3 482 19. Taylor-Robinson D, Horner P, Pallearos A. Diagnosis of some genital-tract infections:  
4 483 part 2. Molecular tests and the new challenges. *Int J STD AIDS* 2020;31(3):198-207. doi:  
5 484 10.1177/0956462419890526 [published Online First: 2020/02/06]  
6  
7  
8  
9 485 20. Kong F, Ma Z, James G, et al. Species identification and subtyping of *Ureaplasma*  
10 486 *parvum* and *Ureaplasma urealyticum* using PCR-based assays. *J Clin Microbiol*  
11 487 2000;38(3):1175-9.  
12  
13  
14  
15 488 21. Robertson JA, Stemke GW, Davis Jr JW, et al. Proposal of *Ureaplasma parvum* sp. nov.  
16 489 and emended description of *Ureaplasma urealyticum* (Shepard et al. 1974) Robertson et al.  
17 490 2001. *Int J Syst Evol Microbiol* 2002;52(2):587-97.  
18  
19  
20  
21 491 22. Vallely LM, Egli-Gany D, Pomat W, et al. Adverse pregnancy and neonatal outcomes  
22 492 associated with *Neisseria gonorrhoeae*, *Mycoplasma genitalium*, *M. hominis*, *Ureaplasma*  
23 493 *urealyticum* and *U. parvum*: a systematic review and meta-analysis protocol. *BMJ Open*  
24 494 2018;8(11)  
25  
26  
27  
28  
29 495 23. Vallely LM, Egli-Gany D, Wand H, et al. Adverse pregnancy and neonatal outcomes  
30 496 associated with *Neisseria gonorrhoeae*: systematic review and meta-analysis. *Sex Transm*  
31 497 *Infect* 2021;97(2):104-11.  
32  
33  
34  
35 498 24. Frenzer C, Egli-Gany D, Vallely LM, et al. Adverse pregnancy and neonatal outcomes  
36 499 associated with *Mycoplasma genitalium*: systematic review and meta-analysis [In Press]. *Sex*  
37 500 *Transm Infect* 2022;Epub ahead of print: doi: doi:10.1136/sextrans-2021-055352  
38  
39  
40  
41 501 25. Page MJ, McKenzie JE, Bossuyt PM, et al. The PRISMA 2020 statement: an updated  
42 502 guideline for reporting systematic reviews. *BMJ* 2021;372:n71. doi: 10.1136/bmj.n71  
43 503 [published Online First: 2021/03/31]  
44  
45  
46  
47 504 26. Dekkers OM, Vandenbroucke JP, Cevallos M, et al. COSMOS-E: guidance on  
48 505 conducting systematic reviews and meta-analyses of observational studies of etiology. *PLoS*  
49 506 *Med* 2019;16(2):e1002742.  
50  
51  
52  
53  
54 507 27. National Institute for Health Care Excellence. The social care guidance manual. Great  
55 508 Britain: National Institute for Health and Care Excellence, 2016.  
56  
57  
58  
59  
60

- 1  
2  
3 509 28. National Institute for Health Care Excellence. Methods for the development of NICE  
4 public health guidance. Great Britain: National Institute for Health and Care Excellence 2012.  
5 510  
6  
7  
8 511 29. Egger M, Davey SG, Schneider M, et al. Bias in meta-analysis detected by a simple,  
9 512 graphical test. *BMJ* 1997;315(7109):629-34.  
10  
11  
12 513 30. Low N. Chlamydia trachomatis and reproductive health: what can we learn from  
13 systematic reviews of observational studies? *Sex Transm Infect* 2020 doi: 10.1136/sextrans-  
14 514 2019-054279 [published Online First: 2020/01/29]  
15 515  
16  
17  
18 516 31. Riley RD, Higgins JP, Deeks JJ. Interpretation of random effects meta-analyses. *BMJ*  
19 517 2011;342:d549.  
20  
21  
22  
23 518 32. Daskalakis G, Thomakos N, Papapanagiotou A, et al. Amniotic fluid interleukin-18 at  
24 519 mid-trimester genetic amniocentesis: Relationship to intraamniotic microbial invasion and  
25 preterm delivery. *BJOG: Int J Obstet Gy* 2009;116(13):1743-48. doi:  
26 520 <http://dx.doi.org/10.1111/j.1471-0528.2009.02364.x>  
27 521  
28  
29  
30 522 33. Hillier SL, Nugent RP, Eschenbach DA, et al. Association between bacterial vaginosis  
31 523 and preterm delivery of a low-birth-weight infant. *N Engl J Med* 1995;333(26):1737-42.  
32  
33  
34  
35 524 34. Berman SM, Harrison HR, Boyce WT, et al. Low birth weight, prematurity, and  
36 525 postpartum endometritis. Association with prenatal cervical *Mycoplasma hominis* and  
37 526 *Chlamydia trachomatis* infections. *JAMA* 1987;257(9):1189-94. [published Online First:  
38 527 1987/03/06]  
39  
40  
41  
42  
43 528 35. Braun P, Lee YH, Klein JO, et al. Birth Weight and Genital Mycoplasmas in Pregnancy.  
44 529 *N Engl J Med* 1971;284(4):167-71. doi: 10.1056/NEJM197101282840401  
45  
46  
47  
48 530 36. Donders GG, Van Calsteren K, Bellen G, et al. Predictive value for preterm birth of  
49 531 abnormal vaginal flora, bacterial vaginosis and aerobic vaginitis during the first trimester of  
50 pregnancy. *BJOG: Int J Obstet Gy* 2009;116(10):1315-24. doi:  
51 532 <https://dx.doi.org/10.1111/j.1471-0528.2009.02237.x>  
52 533  
53  
54  
55 534 37. Gerber S, Vial Y, Hohlfeld P, et al. Detection of *Ureaplasma urealyticum* in second-  
56 535 trimester amniotic fluid by polymerase chain reaction correlates with subsequent preterm  
57 labor and delivery. *J Infect Dis* 2003;187(3):518-21. doi: <https://dx.doi.org/10.1086/368205>  
58 536  
59  
60

- 1  
2  
3 537 38. Govender S, Theron GB, Odendaal HJ, et al. Prevalence of genital mycoplasmas,  
4 538 ureaplasmas and chlamydia in pregnancy. *J Obstet Gynaecol* 2009;29(8):698-701. doi:  
5 539 10.3109/01443610903184033 [published Online First: 2009/10/14]  
6  
7  
8  
9 540 39. Harrison HR, Alexander ER, Weinstein L, et al. Cervical Chlamydia trachomatis and  
10 541 mycoplasmal infections in pregnancy. *Epidemiology and outcomes. JAMA*  
11 542 1983;250(13):1721-7. [published Online First: 1983/10/07]  
12  
13  
14  
15 543 40. Kataoka S, Yamada T, Chou K, et al. Association between preterm birth and vaginal  
16 544 colonization by mycoplasmas in early pregnancy. *J Clin Microbiol* 2006;44(1):51-5. doi:  
17 545 <https://dx.doi.org/10.1128/JCM.44.1.51-55.2006>  
18  
19  
20  
21 546 41. Koucky M, Malickova K, Cindrova-Davies T, et al. Prolonged progesterone  
22 547 administration is associated with less frequent cervicovaginal colonization by *Ureaplasma*  
23 548 *urealyticum* during pregnancy - Results of a pilot study. *J Reprod Immunol* 2016;116:35-41.  
24 549 doi: <http://dx.doi.org/10.1016/j.jri.2016.04.285>  
25  
26  
27  
28  
29 550 42. McDonald HM, O'Loughlin JA, Jolley PT, et al. Changes in vaginal flora during  
30 551 pregnancy and association with preterm birth. *J Infect Dis* 1994;170(3):724-8.  
31  
32  
33  
34 552 43. Menard JP, Mazouni C, Salem-Cherif I, et al. High vaginal concentrations of atropium  
35 553 vaginae and gardnerella vaginalis in women undergoing preterm labor. *Obstet Gynecol*  
36 554 2010;115(1):134-40. doi: <http://dx.doi.org/10.1097/AOG.0b013e3181c391d7>  
37  
38  
39  
40 555 44. Minkoff H, Grunebaum AN, Schwarz RH. Risk factors for prematurity and premature  
41 556 rupture of membranes: A prospective study of the vaginal flora in pregnancy. *Am J Obstet*  
42 557 *Gynecol* 1984;150(8):965-72.  
43  
44  
45  
46 558 45. Nguyen DP, Gerber S, Hohlfeld P, et al. *Mycoplasma hominis* in mid-trimester amniotic  
47 559 fluid: relation to pregnancy outcome. *J Perinat Med* 2004;32(4):323-6. doi:  
48 560 10.1515/JPM.2004.060 [published Online First: 2004/09/07]  
49  
50  
51  
52 561 46. Payne MS, Ireland DJ, Watts R, et al. *Ureaplasma parvum* genotype, combined vaginal  
53 562 colonisation with *Candida albicans*, and spontaneous preterm birth in an Australian cohort of  
54 563 pregnant women. *BMC Pregnancy Childbirth* 2016;16:312-12.  
55  
56  
57  
58  
59  
60

- 1  
2  
3 564 47. Rittenschober-Böhm J, Waldhoer T, Schulz SM, et al. First Trimester Vaginal  
4  
5 565 Ureaplasma Biovar Colonization and Preterm Birth: Results of a Prospective Multicenter  
6  
7 566 Study. *Neonatology* 2018;113(1):1-6. doi: <http://dx.doi.org/10.1159/000480065> [published  
8  
9 567 Online First: 2017/09/22]
- 10  
11 568 48. Usui R, Ohkuchi A, Matsubara S, et al. Vaginal lactobacilli and preterm birth. *J Perinat*  
12  
13 569 *Med* 2002;30(6):458-66. doi: 10.1515/JPM.2002.072 [published Online First: 2003/01/18]  
14
- 15  
16 570 49. Sperling RS, Newton E, Gibbs RS. Intraamniotic Infection in Low-Birth-Weight Infants.  
17  
18 571 *J Infect Dis* 1988;157(1):113-17.
- 19  
20 572 50. Kwak DW, Hwang HS, Kwon JY, et al. Co-infection with vaginal Ureaplasma  
21  
22 573 urealyticum and Mycoplasma hominis increases adverse pregnancy outcomes in patients with  
23  
24 574 preterm labor or preterm premature rupture of membranes. *J Matern -Fetal Neonatal Med*  
25  
26 575 2014;27(4):333-7. doi: <https://dx.doi.org/10.3109/14767058.2013.818124>
- 27  
28 576 51. Odendaal HJ, Popov I, Schoeman J, et al. Preterm labour--is Mycoplasma hominis  
29  
30 577 involved? *S Afr Med J* 2002;92(3):235-7. [published Online First: 2002/06/04]
- 31  
32 578 52. Perni SC, Vardhana S, Korneeva I, et al. Mycoplasma hominis and Ureaplasma  
33  
34 579 urealyticum in midtrimester amniotic fluid: association with amniotic fluid cytokine levels  
35  
36 580 and pregnancy outcome. *Am J Obstet Gynecol* 2004;191(4):1382-6. doi:  
37  
38 581 10.1016/j.ajog.2004.05.070 [published Online First: 2004/10/28]
- 39  
40 582 53. Schwab FD, Zettler EK, Moh A, et al. Predictive factors for preterm delivery under rural  
41  
42 583 conditions in post-tsunami Banda Aceh. *J Perinat Med* 2015;44(5):511-5. doi: 10.1515/jpm-  
43  
44 584 2015-0004 [published Online First: 2015/05/20]
- 45  
46 585 54. Cassell GH, Davis RO, Waites KB, et al. Isolation of Mycoplasma hominis and  
47  
48 586 Ureaplasma urealyticum from amniotic fluid at 16-20 weeks of gestation: Potential effect on  
49  
50 587 outcome of pregnancy. *Sex Transm Dis* 1983;10(4 SUPPL.):294-302.
- 51  
52  
53 588 55. Embree JE, Krause VW, Embil JA, et al. Placental infection with Mycoplasma hominis  
54  
55 589 and Ureaplasma urealyticum: clinical correlation. *Obstet Gynecol* 1980;56(4):475-81.  
56  
57  
58  
59  
60



- 1  
2  
3 590 56. Freitas AC, Bocking A, Hill JE, et al. Increased richness and diversity of the vaginal  
4 591 microbiota and spontaneous preterm birth. *Microbiome* 2018;6(1):117. doi: 10.1186/s40168-  
5 592 018-0502-8 [published Online First: 2018/06/30]  
6  
7  
8  
9 593 57. Harada K, Tanaka H, Komori S, et al. Vaginal infection with *Ureaplasma urealyticum*  
10 594 accounts for preterm delivery via induction of inflammatory responses. *Microbiol Immunol*  
11 595 2008;52(6):297-304. doi: <https://dx.doi.org/10.1111/j.1348-0421.2008.00039.x>  
12  
13  
14  
15 596 58. Hillier SL, Martius J, Krohn M, et al. A case-control study of chorioamnionic infection  
16 597 and histologic chorioamnionitis in prematurity. *N Engl J Med* 1988;319(15):972-78.  
17  
18  
19  
20 598 59. Holst E, Goffeng AR, Andersch B. Bacterial vaginosis and vaginal microorganisms in  
21 599 idiopathic premature labor and association with pregnancy outcome. *J Clin Microbiol*  
22 600 1994;32(1):176-86.  
23  
24  
25  
26 601 60. Kafetzis DA, Skevaki CL, Skouteri V, et al. Maternal genital colonization with  
27 602 *Ureaplasma urealyticum* promotes preterm delivery: association of the respiratory  
28 603 colonization of premature infants with chronic lung disease and increased mortality. *Clin*  
29 604 *Infect Dis* 2004;39(8):1113-22. doi: <https://dx.doi.org/10.1086/424505>  
30  
31  
32  
33  
34 605 61. McDonald HM, O'Loughlin JA, Jolley P, et al. Prenatal microbiological risk factors  
35 606 associated with preterm birth. *Br J Obstet Gynaecol* 1992;99(3):190-6. [published Online  
36 607 First: 1992/03/01]  
37  
38  
39  
40 608 62. Mitsunari M, Yoshida S, Deura I, et al. Cervical *Ureaplasma urealyticum* colonization  
41 609 might be associated with increased incidence of preterm delivery in pregnant women without  
42 610 prophlogistic microorganisms on routine examination. *J Obstet Gynaecol Res* 2005;31(1):16-  
43 611 21. doi: <https://dx.doi.org/10.1111/j.1447-0756.2005.00246.x>  
44  
45  
46  
47  
48 612 63. Munday PE, Porter R, Falder PF. Spontaneous abortion, an infectious aetiology? *Br J*  
49 613 *Obstet Gynaecol* 1984;91(12):1177-80.  
50  
51  
52  
53 614 64. Payne MS, Feng Z, Li S, et al. Second trimester amniotic fluid cytokine concentrations,  
54 615 *Ureaplasma* sp. colonisation status and sexual activity as predictors of preterm birth in  
55 616 Chinese and Australian women. *BMC Pregnancy Childbirth* 2014;14:340. doi:  
56 617 <https://dx.doi.org/10.1186/1471-2393-14-340>  
57  
58  
59  
60

- 1  
2  
3 618 65. Povlsen K, Thorsen P, Lind I. Relationship of Ureaplasma urealyticum biovars to the  
4 619 presence or absence of bacterial vaginosis in pregnant women and to the time of delivery. *Eur*  
5 620 *J Clin Microbiol Infect Dis* 2001;20(1):65-7. [published Online First: 2001/03/14]  
6  
7  
8  
9 621 66. Toth KS, Letchworth AT, Noble AD, et al. The significance of infection in the aetiology  
10 622 of preterm labour. A prospective controlled study. *J Obstet Gynaecol* 1992;12(2):94-99.  
11  
12  
13 623 67. Yoon BH, Oh SY, Romero R, et al. An elevated amniotic fluid matrix metalloproteinase-  
14 624 8 level at the time of mid-trimester genetic amniocentesis is a risk factor for spontaneous  
15 625 preterm delivery. *Am J Obstet Gynecol* 2001;185(5):1162-7. doi:  
16 626 <https://dx.doi.org/10.1067/mob.2001.117678>  
17  
18  
19 627 68. González Bosquet E, Gene A, Ferrer I, et al. Value of endocervical Ureaplasma species  
20 628 colonization as a marker of preterm delivery. *Gynecol Obstet Invest* 2006;61(3):119-23. doi:  
21 629 <http://dx.doi.org/10.1159/000089457>  
22  
23  
24 630 69. Chua KB, Ngeow YF, Lim CT, et al. Colonization and transmission of Ureaplasma  
25 631 urealyticum and Mycoplasma hominis from mothers to full and preterm babies by normal  
26 632 vaginal delivery. *Med J Malaysia* 1999;54(2):242-6. [published Online First: 2000/09/06]  
27  
28  
29 633 70. Jalava J, Laurikainen E, Karkkainen U, et al. Cervical ureaplasma urealyticum  
30 634 colonization: comparison of PCR and culture for its detection and association with preterm  
31 635 birth. *Scand J Infect Dis* 2002;34(1):35-40.  
32  
33  
34 636 71. Kacerovsky M, Pavlovsky M, Tosner J. Preterm premature rupture of the membranes and  
35 637 genital mycoplasmas. *Acta Medica (Hradec Kralove)* 2009;52(3):117-20.  
36  
37  
38 638 72. Kumar SS, V.; Sharma, M. Bacterial vaginosis in preterm labor. *Int J Gynaecol Obstet*  
39 639 2006;95(1):40-41. doi: <http://dx.doi.org/10.1016/j.ijgo.2006.05.022>  
40  
41  
42 640 73. Montenegro DA, Borda LF, Neuta Y, et al. Oral and uro-vaginal intra-amniotic infection  
43 641 in women with preterm delivery: A case-control study. *J Investig Clin Dent*  
44 642 2019;10(2):e12396. doi: <http://dx.doi.org/10.1111/jicd.12396>  
45  
46  
47 643 74. Abele-Horn M, Scholz M, Wolff C, et al. High-density vaginal Ureaplasma urealyticum  
48 644 colonization as a risk factor for chorioamnionitis and preterm delivery. *Acta Obstet Gynecol*  
49 645 *Scand* 2000;79(11):973-8.  
50  
51  
52  
53  
54  
55  
56  
57  
58  
59  
60

- 1  
2  
3 646 75. Grattard F, Soleihac B, De Barbeyrac B, et al. Epidemiologic and molecular  
4 647 investigations of genital mycoplasmas from women and neonates at delivery. *Pediatr Infect*  
5 648 *Dis J* 1995;14(10):853-8.
- 6  
7  
8  
9 649 76. Kundsinn RB, Driscoll SG, Monson RR, et al. Association of *Ureaplasma urealyticum* in  
10 650 the placenta with perinatal morbidity and mortality. *N Engl J Med* 1984;310(15):941-45.
- 11  
12  
13 651 77. McCormack WM, Rosner B, Lee YH, et al. Isolation of genital mycoplasmas from blood  
14 652 obtained shortly after vaginal delivery. *Lancet* 1975;1(7907):596-9.
- 15  
16  
17  
18 653 78. Sweeney EL, Kallapur SG, Gisslen T, et al. Placental Infection With *Ureaplasma* species  
19 654 Is Associated With Histologic Chorioamnionitis and Adverse Outcomes in Moderately  
20 655 Preterm and Late-Preterm Infants. *J Infect Dis* 2016;213(8):1340-47. doi:  
21 656 10.1093/infdis/jiv587
- 22  
23  
24  
25 657 79. Nasution TA, Cheong SF, Lim CT, et al. Multiplex PCR for the detection of urogenital  
26 658 pathogens in mothers and newborns. *Malays J Pathol* 2007;29(1):19-24.
- 27  
28  
29  
30 659 80. Ma C, Du J, Dou Y, et al. The Associations of Genital Mycoplasmas with Female  
31 660 Infertility and Adverse Pregnancy Outcomes: a Systematic Review and Meta-analysis.  
32 661 *Reprod Sci* 2021:1-19.
- 33  
34  
35  
36 662 81. D'Inzeo T, De Angelis G, Fiori B, et al. Comparison of *Mycoplasma* IES, Mycofast  
37 663 Revolution and *Mycoplasma* IST2 to detect genital mycoplasmas in clinical samples. *J Infect*  
38 664 *Dev Ctries* 2017;11(01):98-101.
- 39  
40  
41  
42 665 82. Kusanovic JP, Vargas P, Ferrer F, et al. Comparison of two identification and  
43 666 susceptibility test kits for *Ureaplasma* spp and *Mycoplasma hominis* in amniotic fluid of  
44 667 patients at high risk for intra-amniotic infection. *J Matern -Fetal Neonatal Med*  
45 668 2020;33(20):3409-17. doi: 10.1080/14767058.2019.1572742
- 46  
47  
48  
49 669 83. Taylor-Robinson D. Infections Due to Species of *Mycoplasma* and *Ureaplasma*: An  
50 670 Update. *Clin Infect Dis* 1996;23(4):671-82. doi: 10.1093/clinids/23.4.671
- 51  
52  
53  
54 671 84. Pavlidis I, Spiller OB, Demarco GS, et al. Cervical epithelial damage promotes  
55 672 *Ureaplasma parvum* ascending infection, intrauterine inflammation and preterm birth  
56 673 induction in mice. *Nat Commun* 2020;11(1):1-12.
- 57  
58  
59  
60

- 1  
2  
3 674 85. Kasper DC, Mechtler TP, Reischer GH, et al. The bacterial load of *Ureaplasma parvum* in  
4 675 amniotic fluid is correlated with an increased intrauterine inflammatory response. *Diagn*  
5 676 *Microbiol Infect Dis* 2010;67(2):117-21. doi:  
6 677 <https://dx.doi.org/10.1016/j.diagmicrobio.2009.12.023>  
7  
8  
9  
10  
11 678 86. Witt A, Berger A, Gruber CJ, et al. Increased intrauterine frequency of *Ureaplasma*  
12 679 *urealyticum* in women with preterm labor and preterm premature rupture of the membranes  
13 680 and subsequent cesarean delivery. *Am J Obstet Gynecol* 2005;193(5):1663-9. doi:  
14 681 10.1016/j.ajog.2005.03.067 [published Online First: 2005/11/02]  
15  
16  
17  
18  
19 682 87. Li Y-H, Brauner A, Jonsson B, et al. *Ureaplasma urealyticum*-induced production of  
20 683 proinflammatory cytokines by macrophages. *Pediatr Res* 2000;48(1):114-19.  
21  
22  
23  
24 684 88. Doyle RM, Alber DG, Jones HE, et al. Term and preterm labour are associated with  
25 685 distinct microbial community structures in placental membranes which are independent of  
26 686 mode of delivery. *Placenta* 2014;35(12):1099-101. doi:  
27 687 <https://dx.doi.org/10.1016/j.placenta.2014.10.007>  
28  
29  
30  
31 688 89. Combaz-Söhnchen N, Kuhn A. A systematic review of *Mycoplasma* and *Ureaplasma* in  
32 689 urogynaecology. *Geburtshilfe Frauenheilkd* 2017;77(12):1299.  
33  
34  
35  
36 690 90. Redelinghuys MJ, Ehlers MM, Dreyer AW, et al. Antimicrobial susceptibility patterns of  
37 691 *Ureaplasma* species and *Mycoplasma hominis* in pregnant women. *BMC Infect Dis*  
38 692 2014;14:171. doi: <https://dx.doi.org/10.1186/1471-2334-14-171>  
39  
40  
41  
42 693 91. Bae I, Koh E, Kim S, et al. Prevalence rate and antimicrobial susceptibilities of  
43 694 *Ureaplasma urealyticum* and *Mycoplasma hominis* in pregnant women residing in Jinju,  
44 695 Korea. *Clin Microbiol Infect* 2010;2):S485. doi: [http://dx.doi.org/10.1111/j.1469-](http://dx.doi.org/10.1111/j.1469-0691.2010.03239.x)  
45 696 [0691.2010.03239.x](http://dx.doi.org/10.1111/j.1469-0691.2010.03239.x)  
46  
47  
48  
49  
50 697 92. Bayraktar MR, Ozerol IH, Gucluer N, et al. Prevalence and antibiotic susceptibility of  
51 698 *Mycoplasma hominis* and *Ureaplasma urealyticum* in pregnant women. *Int J Infect Dis*  
52 699 2010;14(2):e90-5. doi: <https://dx.doi.org/10.1016/j.ijid.2009.03.020>  
53  
54  
55  
56 700 93. Vallely AJ, Pomat WS, Homer C, et al. Point-of-care testing and treatment of sexually  
57 701 transmitted infections to improve birth outcomes in high-burden, low-income settings: Study

- 1  
2  
3 702 protocol for a cluster randomized crossover trial (the WANTAIM Trial, Papua New Guinea).  
4  
5 703 *Wellcome Open Res* 2019;4  
6  
7  
8 704 94. Grant JS, Chico RM, Lee AC, et al. Sexually transmitted infections in pregnancy: a  
9  
10 705 narrative review of the global research gaps, challenges, and opportunities. *Sex Transm Dis*  
11 706 2020;47(12):779.  
12  
13  
14  
15  
16  
17  
18  
19  
20  
21  
22  
23  
24  
25  
26  
27  
28  
29  
30  
31  
32  
33  
34  
35  
36  
37  
38  
39  
40  
41  
42  
43  
44  
45  
46  
47  
48  
49  
50  
51  
52  
53  
54  
55  
56  
57  
58  
59  
60

For peer review only

**Figure legends**

**Figure 1.** Forest plot of univariable association between *M. hominis* and preterm birth, from random effects meta-analysis. Studies are in order of precision. Solid diamonds and lines either side are point estimates and 95% confidence intervals for individual studies (arrows show where lower or upper confidence limits extend beyond the x-axis limits). Open diamond shows the point estimate and 95% confidence interval for the summary odds ratio and lines either side of the diamond show the predictive interval.

**Figure 2.** Forest plot of univariable association between *U. urealyticum* and preterm birth, from random effects meta-analysis. Studies are in order of sample size. Solid diamonds and lines either side are point estimates and 95% confidence intervals for individual studies (arrows show where lower or upper confidence limits extend beyond the x-axis limits). Open diamond shows the point estimate and 95% confidence interval for the summary odds ratio and lines either side of the diamond show the predictive interval.

**Figure 3.** Forest plot of univariable association between *U. parvum* and preterm birth, from random effects meta-analysis. Studies are in order of precision. Solid diamonds and lines either side are point estimates and 95% confidence intervals for individual studies (arrows show where lower or upper confidence limits extend beyond the x-axis limits). Open diamond shows the point estimate and 95% confidence interval for the summary odds ratio and lines either side of the diamond show the predictive interval.

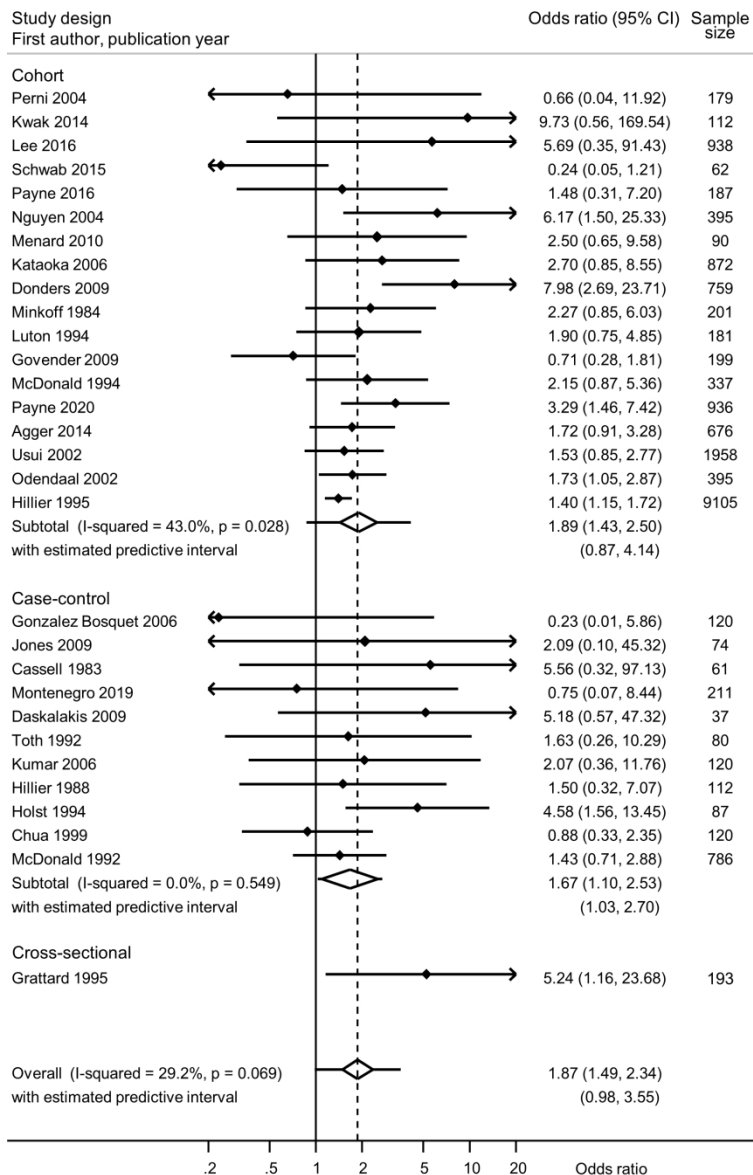

Figure 1. Forest plot of univariable association between *M. hominis* and preterm birth, from random effects meta-analysis. Studies are in order of precision. Solid diamonds and lines either side are point estimates and 95% confidence intervals for individual studies (arrows show where lower or upper confidence limits extend beyond the x-axis limits). Open diamond shows the point estimate and 95% confidence interval for the summary odds ratio and lines either side of the diamond show the predictive interval.

170x270mm (300 x 300 DPI)

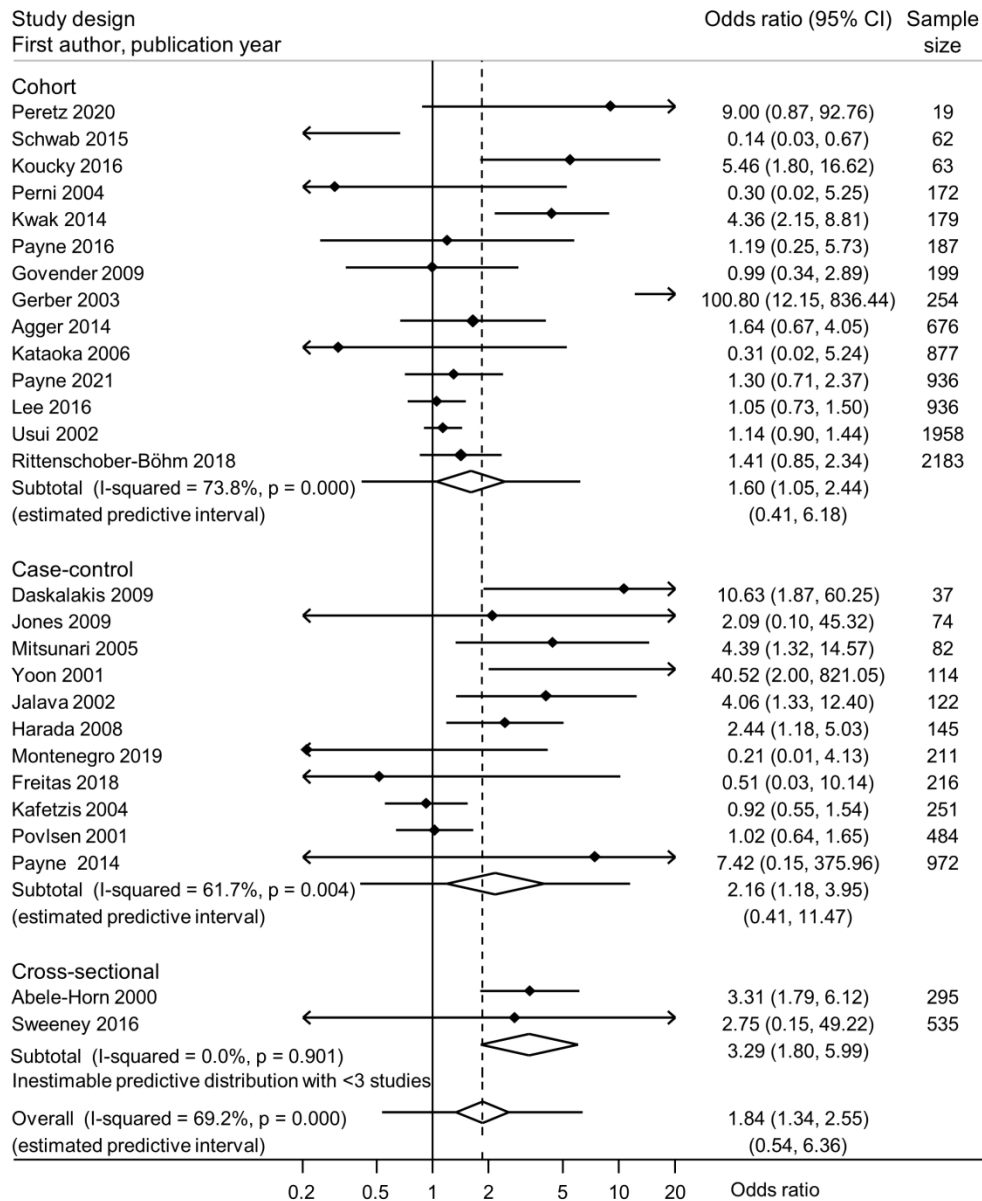

Figure 2. Forest plot of univariable association between *U. urealyticum* and preterm birth, from random effects meta-analysis. Studies are in order of sample size. Solid diamonds and lines either side are point estimates and 95% confidence intervals for individual studies (arrows show where lower or upper confidence limits extend beyond the x-axis limits). Open diamond shows the point estimate and 95% confidence interval for the summary odds ratio and lines either side of the diamond show the predictive interval.

178x218mm (300 x 300 DPI)



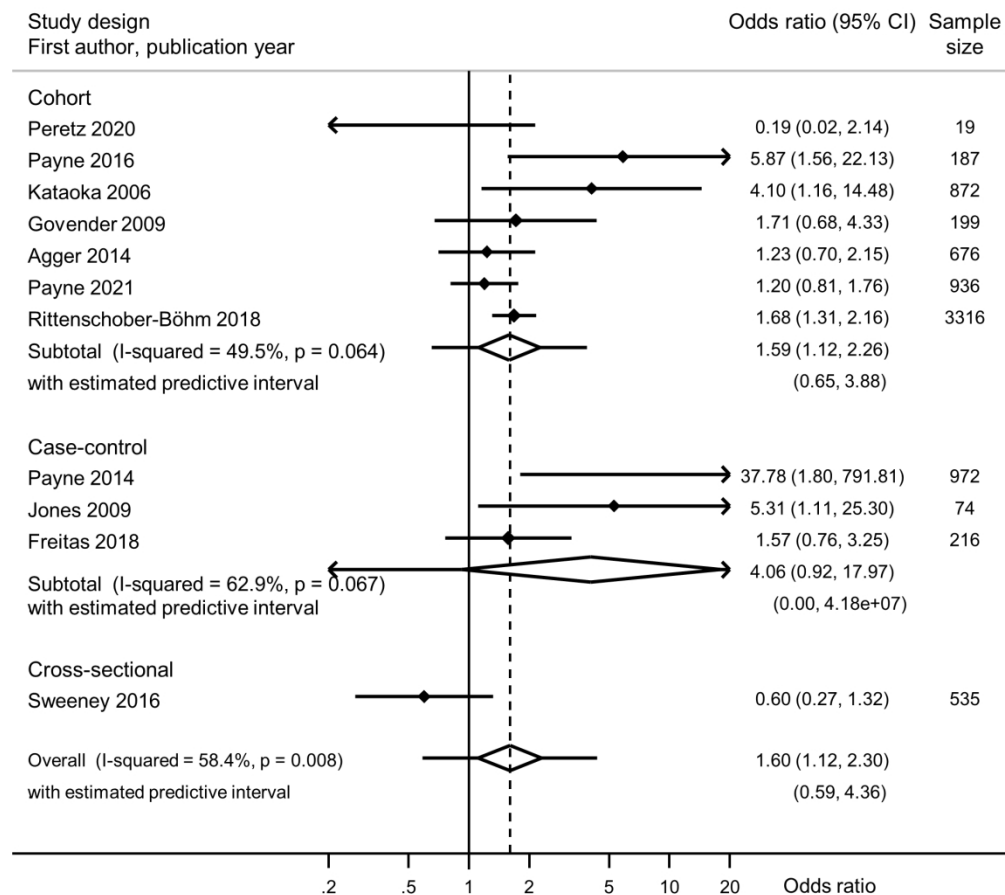

Figure 3. Forest plot of univariable association between *U. parvum* and preterm birth, from random effects meta-analysis. Studies are in order of precision. Solid diamonds and lines either side are point estimates and 95% confidence intervals for individual studies (arrows show where lower or upper confidence limits extend beyond the x-axis limits). Open diamond shows the point estimate and 95% confidence interval for the summary odds ratio and lines either side of the diamond show the predictive interval.

175x156mm (300 x 300 DPI)

## Research checklists

## A. 1 Preferred reporting items for systematic review and meta-analysis (PRISMA)

| Section and Topic    | Item # | Checklist item                                                                                                                                                                                            | Location where item is reported |
|----------------------|--------|-----------------------------------------------------------------------------------------------------------------------------------------------------------------------------------------------------------|---------------------------------|
| TITLE                |        |                                                                                                                                                                                                           |                                 |
| Title                | 1      | Identify the report as a systematic review.                                                                                                                                                               | 1                               |
| ABSTRACT             |        |                                                                                                                                                                                                           |                                 |
| Abstract             | 2      | See the PRISMA 2020 for Abstracts checklist.                                                                                                                                                              | 4-5                             |
| INTRODUCTION         |        |                                                                                                                                                                                                           |                                 |
| Rationale            | 3      | Describe the rationale for the review in the context of existing knowledge.                                                                                                                               | 6                               |
| Objectives           | 4      | Provide an explicit statement of the objective(s) or question(s) the review addresses.                                                                                                                    | 7                               |
| METHODS              |        |                                                                                                                                                                                                           |                                 |
| Eligibility criteria | 5      | Specify the inclusion and exclusion criteria for the review and how studies were grouped for the syntheses.                                                                                               | 7                               |
| Information sources  | 6      | Specify all databases, registers, websites, organisations, reference lists and other sources searched or consulted to identify studies. Specify the date when each source was last searched or consulted. | 8                               |
| Search strategy      | 7      | Present the full search strategies for all databases, registers and websites, including any filters and limits used.                                                                                      | Appendix S1                     |
| Selection process    | 8      | Specify the methods used to decide whether a study met the inclusion criteria of the review, including how many reviewers screened each record and each report                                            | 8                               |

## Research checklists

| Section and Topic             | Item # | Checklist item                                                                                                                                                                                                                                                                                       | Location where item is reported |
|-------------------------------|--------|------------------------------------------------------------------------------------------------------------------------------------------------------------------------------------------------------------------------------------------------------------------------------------------------------|---------------------------------|
|                               |        | retrieved, whether they worked independently, and if applicable, details of automation tools used in the process.                                                                                                                                                                                    |                                 |
| Data collection process       | 9      | Specify the methods used to collect data from reports, including how many reviewers collected data from each report, whether they worked independently, any processes for obtaining or confirming data from study investigators, and if applicable, details of automation tools used in the process. | 8-9                             |
| Data items                    | 10a    | List and define all outcomes for which data were sought. Specify whether all results that were compatible with each outcome domain in each study were sought (e.g. for all measures, time points, analyses), and if not, the methods used to decide which results to collect.                        | 6                               |
|                               | 10b    | List and define all other variables for which data were sought (e.g. participant and intervention characteristics, funding sources). Describe any assumptions made about any missing or unclear information.                                                                                         | 8-9                             |
| Study risk of bias assessment | 11     | Specify the methods used to assess risk of bias in the included studies, including details of the tool(s) used, how many reviewers assessed each study and whether they worked independently, and if applicable, details of automation tools used in the process.                                    | 9                               |
| Effect measures               | 12     | Specify for each outcome the effect measure(s) (e.g. risk ratio, mean difference) used in the synthesis or presentation of results.                                                                                                                                                                  | 9                               |
| Synthesis methods             | 13a    | Describe the processes used to decide which studies were eligible for each synthesis (e.g. tabulating the study intervention characteristics and comparing against the planned groups for each synthesis (item #5)).                                                                                 | 9                               |

## Research checklists

| Section and Topic         | Item # | Checklist item                                                                                                                                                                                                                                              | Location where item is reported |
|---------------------------|--------|-------------------------------------------------------------------------------------------------------------------------------------------------------------------------------------------------------------------------------------------------------------|---------------------------------|
|                           | 13b    | Describe any methods required to prepare the data for presentation or synthesis, such as handling of missing summary statistics, or data conversions.                                                                                                       | 9                               |
|                           | 13c    | Describe any methods used to tabulate or visually display results of individual studies and syntheses.                                                                                                                                                      | 9                               |
|                           | 13d    | Describe any methods used to synthesize results and provide a rationale for the choice(s). If meta-analysis was performed, describe the model(s), method(s) to identify the presence and extent of statistical heterogeneity, and software package(s) used. | 9                               |
|                           | 13e    | Describe any methods used to explore possible causes of heterogeneity among study results (e.g. subgroup analysis, meta-regression).                                                                                                                        | 9                               |
|                           | 13f    | Describe any sensitivity analyses conducted to assess robustness of the synthesized results.                                                                                                                                                                | None                            |
| Reporting bias assessment | 14     | Describe any methods used to assess risk of bias due to missing results in a synthesis (arising from reporting biases).                                                                                                                                     | 9                               |
| Certainty assessment      | 15     | Describe any methods used to assess certainty (or confidence) in the body of evidence for an outcome.                                                                                                                                                       | 9                               |
| <b>RESULTS</b>            |        |                                                                                                                                                                                                                                                             |                                 |
| Study selection           | 16a    | Describe the results of the search and selection process, from the number of records identified in the search to the number of studies included in the review, ideally using a flow diagram.                                                                | Figure S1                       |

## Research checklists

| Section and Topic             | Item # | Checklist item                                                                                                                                                                                                                                                                       | Location where item is reported                      |
|-------------------------------|--------|--------------------------------------------------------------------------------------------------------------------------------------------------------------------------------------------------------------------------------------------------------------------------------------|------------------------------------------------------|
|                               | 16b    | Cite studies that might appear to meet the inclusion criteria, but which were excluded, and explain why they were excluded.                                                                                                                                                          | Figure S1                                            |
| Study characteristics         | 17     | Cite each included study and present its characteristics.                                                                                                                                                                                                                            | Table S1, reference list                             |
| Risk of bias in studies       | 18     | Present assessments of risk of bias for each included study.                                                                                                                                                                                                                         | 11, supporting information                           |
| Results of individual studies | 19     | For all outcomes, present, for each study: (a) summary statistics for each group (where appropriate) and (b) an effect estimate and its precision (e.g. confidence/credible interval), ideally using structured tables or plots.                                                     | Table 1, Fig 1, Fig 2, Fig 3, supporting information |
| Results of syntheses          | 20a    | For each synthesis, briefly summarise the characteristics and risk of bias among contributing studies.                                                                                                                                                                               | 11, supporting information                           |
|                               | 20b    | Present results of all statistical syntheses conducted. If meta-analysis was done, present for each the summary estimate and its precision (e.g. confidence/credible interval) and measures of statistical heterogeneity. If comparing groups, describe the direction of the effect. | 11-14                                                |
|                               | 20c    | Present results of all investigations of possible causes of heterogeneity among study results.                                                                                                                                                                                       | Supporting information                               |
|                               | 20d    | Present results of all sensitivity analyses conducted to assess the robustness of the synthesized results.                                                                                                                                                                           | None                                                 |
| Reporting biases              | 21     | Present assessments of risk of bias due to missing results (arising from reporting biases) for each synthesis assessed.                                                                                                                                                              | None                                                 |

## Research checklists

| Section and Topic         | Item # | Checklist item                                                                                                                                 | Location where item is reported             |
|---------------------------|--------|------------------------------------------------------------------------------------------------------------------------------------------------|---------------------------------------------|
| Certainty of evidence     | 22     | Present assessments of certainty (or confidence) in the body of evidence for each outcome assessed.                                            | Fig 1, Fig 2, Fig 3, supporting information |
| <b>DISCUSSION</b>         |        |                                                                                                                                                |                                             |
| Discussion                | 23a    | Provide a general interpretation of the results in the context of other evidence.                                                              | 15                                          |
|                           | 23b    | Discuss any limitations of the evidence included in the review.                                                                                | 16                                          |
|                           | 23c    | Discuss any limitations of the review processes used.                                                                                          | 15                                          |
|                           | 23d    | Discuss implications of the results for practice, policy, and future research.                                                                 | 17-18                                       |
| <b>OTHER INFORMATION</b>  |        |                                                                                                                                                |                                             |
| Registration and protocol | 24a    | Provide registration information for the review, including register name and registration number, or state that the review was not registered. | 1                                           |
|                           | 24b    | Indicate where the review protocol can be accessed, or state that a protocol was not prepared.                                                 | 1                                           |
|                           | 24c    | Describe and explain any amendments to information provided at registration or in the protocol.                                                | None                                        |
| Support                   | 25     | Describe sources of financial or non-financial support for the review, and the role of the funders or sponsors in the review.                  | 18                                          |
| Competing interests       | 26     | Declare any competing interests of review authors.                                                                                             | 19                                          |

Research checklists

1  
2  
3  
4  
5  
6  
7  
8  
9  
10  
11  
12  
13  
14  
15  
16  
17  
18  
19  
20  
21  
22  
23  
24  
25  
26  
27  
28  
29  
30  
31  
32  
33  
34  
35  
36  
37  
38  
39  
40  
41  
42  
43  
44  
45  
46

| Section and Topic                              | Item # | Checklist item                                                                                                                                                                                                                             | Location where item is reported |
|------------------------------------------------|--------|--------------------------------------------------------------------------------------------------------------------------------------------------------------------------------------------------------------------------------------------|---------------------------------|
| Availability of data, code and other materials | 27     | Report which of the following are publicly available and where they can be found: template data collection forms; data extracted from included studies; data used for all analyses; analytic code; any other materials used in the review. | Supporting information          |

For peer review only

## Research checklists

A.2 Preferred reporting checklist of Meta-analysis (MOOSE)<sup>1</sup>

| Checklist item                                                                          | Page #                                             |
|-----------------------------------------------------------------------------------------|----------------------------------------------------|
| <b>Reporting of background should include</b>                                           |                                                    |
| Problem definition                                                                      | 6                                                  |
| Hypothesis statement                                                                    | No                                                 |
| Description of study outcome(s)                                                         | 6                                                  |
| Type of exposure or intervention used                                                   | 6-7                                                |
| Type of study designs used                                                              | 7                                                  |
| Study population                                                                        | 7                                                  |
| <b>Reporting of search strategy should include</b>                                      |                                                    |
| Qualifications of searchers (eg. Librarians and investigators)                          | 1                                                  |
| Search strategy, including time period included in the synthesis and keywords           | 7-8, Appendix S1                                   |
| Effort to include all available studies, including contact with authors                 | No                                                 |
| Databases and registries searched                                                       | 8                                                  |
| Search software used, name and version, including special features used (eg, explosion) | No                                                 |
| Use of hand searching (eg, reference lists of obtained articles)                        | 8                                                  |
| List of citations located and those excluded, including justification                   | Fig 1,<br>Table S1, excluded<br>studies not listed |



## Research checklists

|                                                                                                                                                                                                                                                                           |                                                      |
|---------------------------------------------------------------------------------------------------------------------------------------------------------------------------------------------------------------------------------------------------------------------------|------------------------------------------------------|
| Method of addressing articles published in languages other than English                                                                                                                                                                                                   | 8                                                    |
| Method of handling abstracts and unpublished studies                                                                                                                                                                                                                      | Excluded                                             |
| Description of any contact with authors                                                                                                                                                                                                                                   | We did not contact authors                           |
| <b>Reporting of methods should include</b>                                                                                                                                                                                                                                |                                                      |
| Description of relevance or appropriateness of studies assembled for assessing the hypothesis to be tested                                                                                                                                                                | 7-8                                                  |
| Rationale for the selection and coding of data (eg, multiple raters, blinding and interrater reliability)                                                                                                                                                                 | 7-8                                                  |
| Assessment of confounding (eg, comparability of cases and controls in studies where appropriate)                                                                                                                                                                          | 7                                                    |
| Assessment of study quality, including blinding of quality assessors; stratification or regression on possible predictors of study results                                                                                                                                | 9                                                    |
| Assessment of heterogeneity                                                                                                                                                                                                                                               | 9                                                    |
| Description of statistical methods (eg, complete description of fixed or random effects models, justification of whether the chosen models account for predictors of study results, dose-response models, cumulative meta-analysis) in sufficient detail to be replicated | 9                                                    |
| Provision of appropriate tables and graphs                                                                                                                                                                                                                                | Main text and supporting information                 |
| <b>Reporting of results should include</b>                                                                                                                                                                                                                                |                                                      |
| Graphic summarizing individual study estimates and overall estimate                                                                                                                                                                                                       | Main text and forest plots in supporting information |

## Research checklists

|                                                                                                                       |                                                      |
|-----------------------------------------------------------------------------------------------------------------------|------------------------------------------------------|
| Table giving descriptive information for each study included                                                          | Table S1                                             |
| Results of sensitivity testing (eg, subgroup analysis)                                                                | None                                                 |
| Indication of statistical uncertainty of findings                                                                     | Main text and forest plots in supporting information |
| <b>Reporting of discussion should include</b>                                                                         |                                                      |
| Quantitative assessment of bias (eg, publication bias)                                                                | 15-16                                                |
| Justification of exclusion (eg. Exclusion of non-English-language citations)                                          | No (provided pg 8 on methods)                        |
| Assessment of Quality of included studies                                                                             | 15-17                                                |
| <b>Reporting of conclusions should include</b>                                                                        |                                                      |
| Consideration of alternative explanations of observations                                                             | 17-18                                                |
| Generalization of conclusions (ie, appropriate for the data presented and within the domain of the literature review) | 17-18                                                |
| Guidelines for future research                                                                                        | 17-18                                                |
| Disclosure of funding source                                                                                          | 18                                                   |

<sup>1</sup> Stroup DF, Berlin JA, Morton SC, Olkin I, Williamson GD, Rennie D, et al. Meta-analysis of observational studies in epidemiology: a proposal for reporting. **Jama**. 2000 Apr 19;283(15):2008-12.

## Supplementary Material

### **Adverse birth outcomes associated with *Mycoplasma hominis*, *Ureaplasma urealyticum* and *Ureaplasma parvum*: A systematic review and meta-analysis.**

Marinjho Emely JONDUO (MSc),<sup>1</sup> Lisa Michelle VALLELY (PhD),<sup>1,2</sup> Handan WAND (PhD),<sup>3</sup> Emma Louise SWEENEY (PhD),<sup>4</sup> Dianne EGLI-GANY (PhD),<sup>5</sup> John Martin KALDOR (PhD),<sup>1</sup> Andrew John VALLELY (PhD),<sup>1,2</sup> Nicola LOW (PhD).<sup>5</sup>

<sup>1</sup> Public Health Interventions Research Program, The Kirby Institute, University of New South Wales, Sydney, NSW 2052, Australia.

<sup>2</sup> Sexual and Reproductive Health Unit, Papua New Guinea Institute of Medical Research, Goroka, Eastern Highlands Province 441, Papua New Guinea.

<sup>3</sup> Biostatistics and Databases program, The Kirby Institute, University of New South Wales, Sydney, New South Wales, Australia.

<sup>4</sup> The University of Queensland Center for Clinical Research, Brisbane, Queensland 4029, Australia.

<sup>5</sup> Institute of Social and Preventive Medicine, University of Bern, CH-3012 Bern, Switzerland.

## **Table of Contents**

|                                                                                                                                                             |     |
|-------------------------------------------------------------------------------------------------------------------------------------------------------------|-----|
| <b>Table of Contents</b> .....                                                                                                                              | 2   |
| <b>Text S1</b> Search strategy .....                                                                                                                        | 3   |
| <b>Figure S1</b> Flow chart of identified and selected studies for inclusion .....                                                                          | 4   |
| <b>Table S1</b> Summary of characteristics of included studies .....                                                                                        | 5   |
| <b>Figure S3.1</b> Forest plot of association between <i>M. hominis</i> and premature rupture of membrane, random effects model.....                        | 23  |
| <b>Figure S3.2</b> Forest plot of association between <i>M. hominis</i> and low birthweight, random effects model. ....                                     | 24  |
| <b>Figure S3.3</b> Forest plot of association between <i>M. hominis</i> and perinatal death random effects model. ....                                      | 25  |
| <b>Figure S3.4</b> Forest plot of association between <i>M. hominis</i> and spontaneous abortion random effects model. ....                                 | 26  |
| <b>Figure S4.1</b> Forest plot of association between <i>U. urealyticum</i> and premature rupture of membrane, random effects model.....                    | 27  |
| <b>Figure S4.2</b> Forest plot of association between <i>U. urealyticum</i> and low birth weight, random effects model. ....                                | 28  |
| <b>Figure S4.3</b> Forest plot of association between <i>U. urealyticum</i> and spontaneous abortion, random effects model.....                             | 29  |
| <b>Figure S5.1</b> Forest plot of association between <i>U. parvum</i> and preterm birth, random effects model.....                                         | 31  |
| <b>Figure S5.2</b> Forest plot of association between <i>U. parvum</i> and premature rupture of membrane, random effects model.....                         | 32  |
| <b>Table S3.1</b> Descriptive tables: Cohort studies (n=26).....                                                                                            | 34  |
| <b>Table S3.2</b> Descriptive tables: Case control studies (n=25).....                                                                                      | 40  |
| <b>Table S4.1</b> Summary description of studies reporting <i>M. hominis</i> (n=42), by income status.....                                                  | 46  |
| <b>Table S4.2</b> Summary description of studies reporting <i>U. urealyticum</i> (n=31), by income status.....                                              | 55  |
| <b>Table S4.3</b> Summary description of studies reporting <i>U. parvum</i> (n=12), by income status.....                                                   | 62  |
| <b>Table S5.1</b> Study setting and socio-demographics, cohort studies (n=26).....                                                                          | 65  |
| <b>Table S5.3</b> Study setting and socio-demographics, cross-sectional studies (n=6) .....                                                                 | 71  |
| <b>Table S6</b> Studies that reported on bacterial vaginosis or sexually transmitted infections and reported associations with adverse birth outcomes ..... | 72  |
| <b>Table S7.1</b> Risk of bias assessment, cohort studies (n=26).....                                                                                       | 78  |
| <b>Table S7.2</b> Risk of bias assessment, case-control studies (n=25) .....                                                                                | 93  |
| <b>Table S7.3</b> Risk of bias assessment, cross-sectional studies (n=6) .....                                                                              | 101 |

**Text S1** Search strategy

- 
1. Terms for population “pregnancy” or “prenatal” or “antenatal”
- 
2. Terms for exposure “Mycoplasma hominis” or “M. hominis”; “Ureaplasma urealyticum” or “U. urealyticum”; “Ureaplasma parvum” or “U. parvum”
- 
3. Terms for outcomes “birth outcome” or “adverse birth outcome” or “adverse pregnancy outcome” or “perinatal morbidity” or “perinatal mortality” or “perinatal outcome” or “premature birth” or “premature delivery” or “very preterm birth” or “preterm birth” or “preterm delivery” or “premature labour” or “preterm labour” or “premature labor” or “preterm labor” or “premature rupture of membranes” or “preterm rupture of membranes” or “preterm premature rupture of membranes” or “low birth weight” or “intrauterine growth retardation” or “intrauterine growth restriction” or “small for gestational age” or “gestational age” or “stillbirth” or “perinatal mortality” or “perinatal morbidity” or “perinatal death” or “neonatal mortality” or “neonatal morbidity” or “neonatal death” or “fetal death” or “miscarriage” or “spontaneous abortion” or “chorioamnionitis”
- 
4. Search = #1 + # 2 + # 3
- 

Free text terms in the search strategy will use truncated and wildcard forms e.g., pregn\*

Explode function used for MeSH headings

Reference lists of retrieved articles searched

**Figure S1** Flow chart of identified and selected studies for inclusion

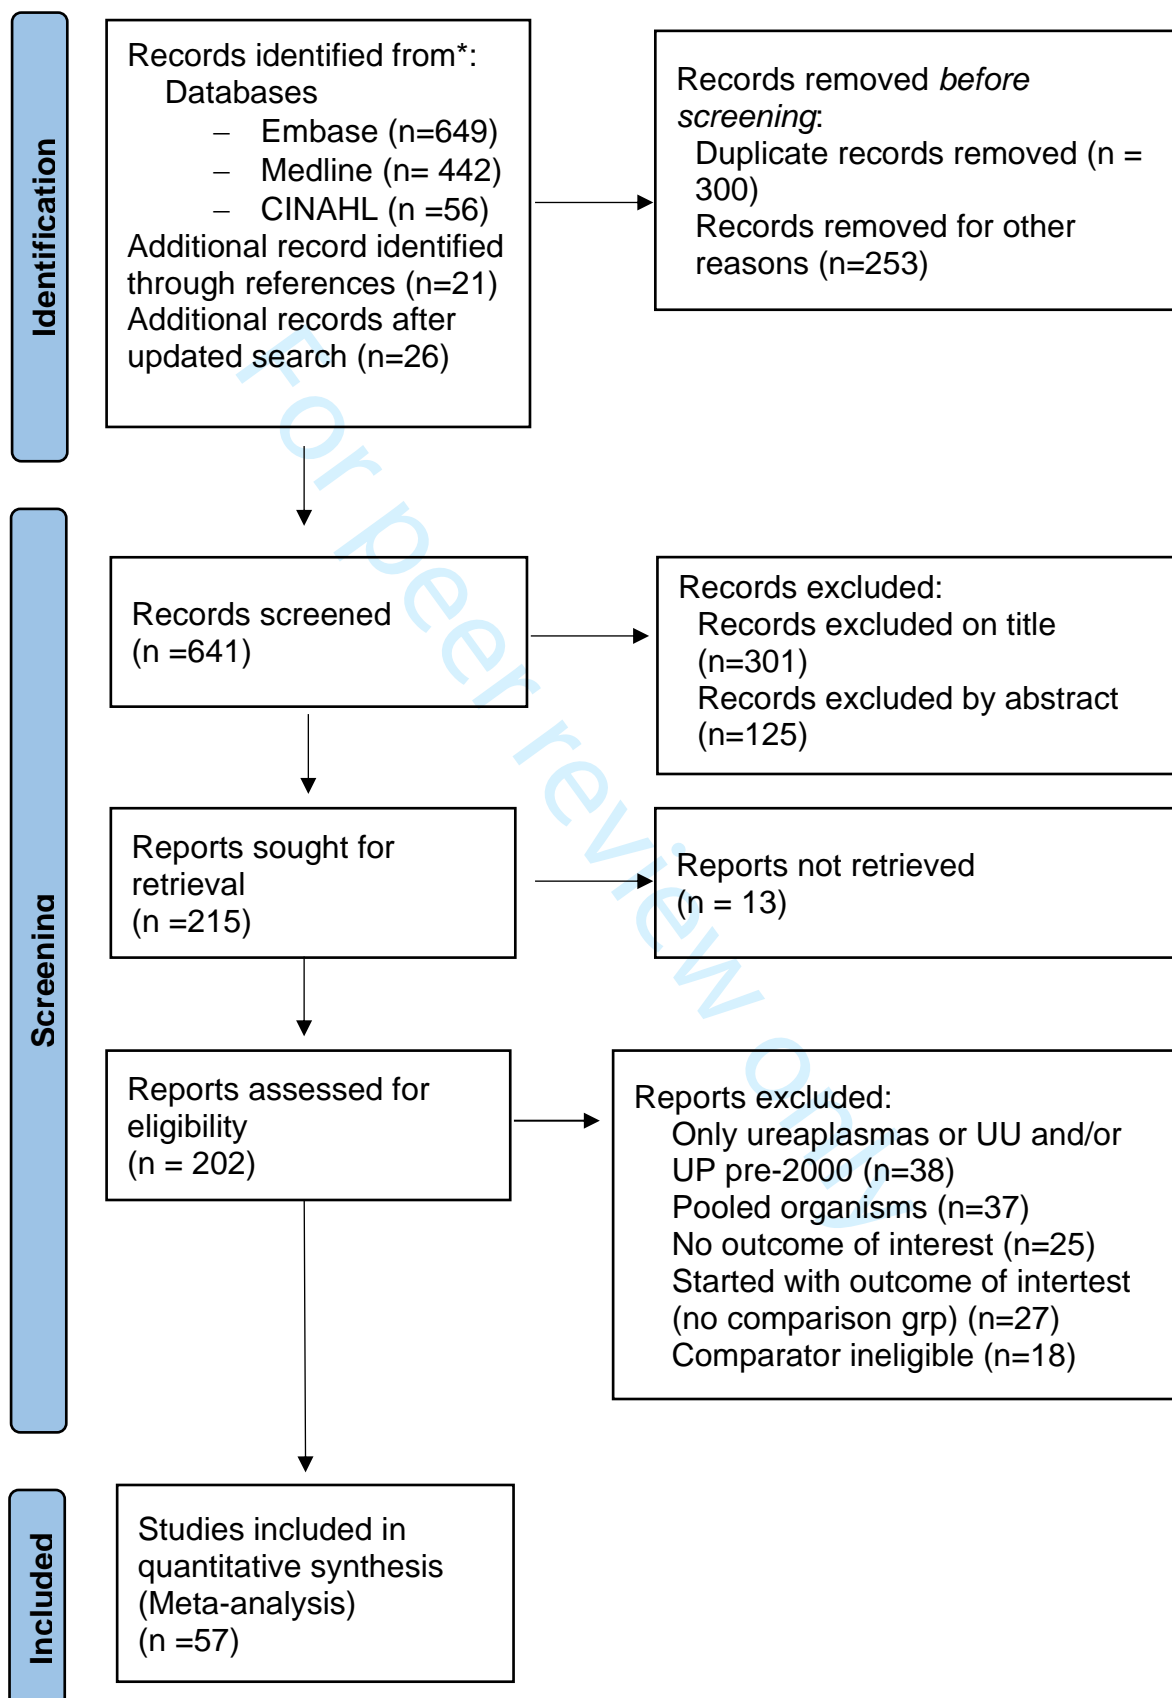

Supporting information

Table S1 Summary of characteristics of included studies

| First author,<br>publication year,<br>study<br>reference*† | Country | Study<br>design | Study population                                                                    | Total<br>no. of<br>women | Outcomes<br>measured | Specimen type;<br>collection time                                                   | Diagnostic<br>method | BV<br>assessed |
|------------------------------------------------------------|---------|-----------------|-------------------------------------------------------------------------------------|--------------------------|----------------------|-------------------------------------------------------------------------------------|----------------------|----------------|
| Abele-Horn,<br>2000 <sup>73</sup>                          | Germany | Cross-sectional | Admitted for delivery, Jan - Dec 1996                                               | 295                      | PTB,<br>PROM         | Endocervical swab;<br>1 <sup>st</sup> & 2 <sup>nd</sup> trimester                   | Culture              | Excluded       |
| Agger, 2014 <sup>1</sup>                                   | USA     | Cohort          | 10 to 14 weeks gestation, initial prenatal visit; currently uncomplicated pregnancy | 783                      | PTB                  | Endocervical swab;<br>1 <sup>st</sup> , 2 <sup>nd</sup> trimester                   | NAAT                 | NR             |
| Ahmadi, 2014 <sup>9</sup>                                  | Iran    | Case-control    | 10-20 weeks (cases); normal pregnancy 20-30 weeks (control)                         | 218                      | SA                   | Endocervical swab;<br>1 <sup>st</sup> , 2 <sup>nd</sup> , 3 <sup>rd</sup> trimester | NAAT                 | NR             |
| Berman, 1987 <sup>32</sup>                                 | Mexico  | Cohort          | Women at their prenatal care visit, single centre; Oct 1980 - Oct 1983              | 1204                     | LBW                  | Endocervical swab;<br>1 <sup>st</sup> , 2 <sup>nd</sup> , 3 <sup>rd</sup> trimester | Culture              | NR             |

## Supporting information

| First author,<br>publication year,<br>study<br>reference*† | Country  | Study<br>design  | Study population                                                                                     | Total<br>no. of<br>women | Outcomes<br>measured | Specimen type;<br>collection time                                           | Diagnostic<br>method | BV<br>assessed |
|------------------------------------------------------------|----------|------------------|------------------------------------------------------------------------------------------------------|--------------------------|----------------------|-----------------------------------------------------------------------------|----------------------|----------------|
| <b>Braun, 1971</b> <sup>33</sup>                           | USA      | Cohort           | Entering antenatal clinic, single<br>centre; Feb-Jul 1969                                            | 688                      | LBW                  | Endocervical swab,<br>urine; 1 <sup>st</sup> & 3 <sup>rd</sup><br>trimester | Culture              | NR             |
| <b>Cassell, 1983</b> <sup>53</sup>                         | USA      | Case-<br>control | Attending the amniocentesis for<br>prenatal diagnosis, single centre                                 | 61                       | PTB,<br>PND          | Amniotic fluid; 2 <sup>nd</sup><br>trimester                                | Culture              | NR             |
| <b>Chua, 1999</b> <sup>68</sup>                            | Malaysia | Case-<br>control | 60 sequential mother who<br>delivered and premature babies,<br>single centre, Jan 1996- June<br>1997 | 120                      | PTB                  | Endocervical swab;<br>2 <sup>nd</sup> , 3 <sup>rd</sup> trimester           | Culture              | NR             |
| <b>Daskalakis,<br/>2009</b> <sup>30</sup>                  | NR       | Case-<br>control | Singleton, normal pregnancy,<br>>18 years old, mid-trimester                                         | 613                      | PTB                  | Amniotic fluid; 2 <sup>nd</sup><br>trimester                                | Culture              | NR             |



Supporting information

| First author,<br>publication year,<br>study<br>reference*† | Country | Study<br>design | Study population                                                                                                                      | Total<br>no. of<br>women | Outcomes<br>measured | Specimen type;<br>collection time                                                | Diagnostic<br>method | BV<br>assessed |
|------------------------------------------------------------|---------|-----------------|---------------------------------------------------------------------------------------------------------------------------------------|--------------------------|----------------------|----------------------------------------------------------------------------------|----------------------|----------------|
|                                                            |         |                 | amniocentesis, Feb 2006 - Sept 2007                                                                                                   |                          |                      |                                                                                  |                      |                |
| Donders, 2009 <sup>34</sup>                                | Belgium | Cohort          | Singleton, first antenatal visit between 9 -16 weeks with complete data available on <i>M. hominis</i> cultures; June 2000 – Dec 2001 | 759                      | PTB, SA              | Vaginal swab; 1 <sup>st</sup> & 2 <sup>nd</sup> trimester                        | Culture              | Yes            |
| Embree, 1980 <sup>54</sup>                                 | Canada  | Case-control    | Single centre, deliveries between May 1977 and Jan 1978                                                                               | 554                      | SA, PND              | Placenta; Post-partum                                                            | Culture              | NR             |
| Farhadifar, 2016 <sup>11</sup>                             | Iran    | Case-control    | Admitted in obstetrics and gynaecology wards; no                                                                                      | 218                      | SA                   | Endocervical swab; 1 <sup>st</sup> , 2 <sup>nd</sup> , 3 <sup>rd</sup> trimester | NAAT                 | NR             |

## Supporting information

| First author,<br>publication year,<br>study<br>reference*† | Country | Study<br>design  | Study population                                                                                           | Total<br>no. of<br>women | Outcomes<br>measured | Specimen type;<br>collection time            | Diagnostic<br>method | BV<br>assessed |
|------------------------------------------------------------|---------|------------------|------------------------------------------------------------------------------------------------------------|--------------------------|----------------------|----------------------------------------------|----------------------|----------------|
|                                                            |         |                  | antibiotics two weeks before<br>sampling, no chronic disease,<br>vaginal infection; Aug 2012 –<br>Jan 2013 |                          |                      |                                              |                      |                |
| <b>Freitas, 2018<sup>55</sup></b>                          | Canada  | Case-<br>control | Spontaneous preterm birth and<br>term deliveries, multicentre                                              | 216                      | PTB                  | Vaginal swab; 2 <sup>nd</sup><br>trimester   | NAAT                 | NR             |
| <b>Gerber, 2003<sup>80</sup></b>                           | NR      | Cohort           | Transabdominal amniocentesis<br>at 15-17 weeks GA; singleton<br>without complicated pregnancy              | 254                      | PTB,<br>PROM         | Amniotic fluid; 2 <sup>nd</sup><br>trimester | NAAT                 | NR             |
| <b>González<br/>Bosquet, 2006<sup>67</sup></b>             | NR      | Case-<br>control | Case: 24-34 weeks PTL, intact<br>membranes; control: no history                                            | 250                      | PTB                  | Endocervical swab;<br>NR                     | Culture              | Yes            |

Supporting information

| First author,<br>publication year,<br>study<br>reference*† | Country         | Study<br>design     | Study population                                                                                          | Total<br>no. of<br>women | Outcomes<br>measured | Specimen type;<br>collection time                                 | Diagnostic<br>method | BV<br>assessed |
|------------------------------------------------------------|-----------------|---------------------|-----------------------------------------------------------------------------------------------------------|--------------------------|----------------------|-------------------------------------------------------------------|----------------------|----------------|
|                                                            |                 |                     | of preterm birth at same stage of<br>delivery                                                             |                          |                      |                                                                   |                      |                |
| <b>Govender,<br/>2009<sup>79</sup></b>                     | South<br>Africa | Cohort              | Low risk obstetric patients at<br>first prenatal visit (16-23 weeks<br>gestation)                         | 199                      | PTB                  | Endocervical swab;<br>2 <sup>nd</sup> trimester                   | NAAT                 | NR             |
| <b>Grattard, 1995<sup>74</sup></b>                         | France          | Cross-<br>sectional | Women who delivered between<br>Feb - May 1993 in obstetrical<br>ward and their neonates, single<br>centre | 208                      | PTB,<br>LBW<br>PROM, | Endocervical swab;<br>post-partum                                 | Culture              | NR             |
| <b>Harada, 2008<sup>56</sup></b>                           | Japan           | Case-<br>control    | Premature and term deliveries,<br>Jan 2006 - July 2007                                                    | 145                      | PTB                  | Endocervical swab;<br>2 <sup>nd</sup> , 3 <sup>rd</sup> trimester | NAAT,<br>Culture     | NR             |

## Supporting information

| First author,<br>publication year,<br>study<br>reference*† | Country | Study<br>design | Study population                                                                                  | Total<br>no. of<br>women | Outcomes<br>measured | Specimen type;<br>collection time                                                   | Diagnostic<br>method | BV<br>assessed |
|------------------------------------------------------------|---------|-----------------|---------------------------------------------------------------------------------------------------|--------------------------|----------------------|-------------------------------------------------------------------------------------|----------------------|----------------|
| <b>Harrison, 1983<sup>37</sup></b>                         | USA     | Cohort          | Enrolled at their first prenatal visit, single centre                                             | 860                      | SA                   | Endocervical swab;<br>1 <sup>st</sup> , 2 <sup>nd</sup> , 3 <sup>rd</sup> trimester | Culture,<br>ELISA    | NR             |
| <b>Hillier, 1988<sup>57</sup></b>                          | USA     | Case-control    | Age >16 years; no antibiotics in previous 2 weeks; no known fetal anomaly; June 1984- June 1985   | 112                      | PTB                  | Placenta; Post-partum                                                               | Culture              | Yes            |
| <b>Hillier, 1995<sup>31</sup></b>                          | USA     | Cohort          | > 16 years, singleton pregnancies at routine prenatal visits (23 to 26 weeks), between 1984-1989, | 10,397                   | PTB                  | Endocervical swab;<br>2 <sup>nd</sup> trimester                                     | Culture              | Yes            |

## Supporting information

| First author,<br>publication year,<br>study<br>reference*† | Country           | Study<br>design  | Study population                                                                                            | Total<br>no. of<br>women | Outcomes<br>measured | Specimen type;<br>collection time                                 | Diagnostic<br>method | BV<br>assessed |
|------------------------------------------------------------|-------------------|------------------|-------------------------------------------------------------------------------------------------------------|--------------------------|----------------------|-------------------------------------------------------------------|----------------------|----------------|
| <b>Holst, 1994</b> <sup>58</sup>                           | Sweden            | Case-<br>control | Women presenting in PTL;<br>controls were women with no<br>pregnancy history                                | 87                       | PTB                  | Endocervical swab;<br>3 <sup>rd</sup> trimester                   | Culture              | yes            |
| <b>Jalava, 2002</b> <sup>69</sup>                          | NR                | Case-<br>control | Control: 3rd trimester, no signs<br>labour. Cases: contractions as<br>sign of premature labour 22-<br>35/40 | 122                      | PTB                  | Endocervical swab;<br>2 <sup>nd</sup> , 3 <sup>rd</sup> trimester | NAAT                 | NR             |
| <b>Jones, 2009</b> <sup>10</sup>                           | United<br>Kingdom | Case-<br>control | Single centre, cases: <32 weeks<br>gestation; Control >37 weeks;<br>single centre                           | 74                       | PTB,<br>PROM         | Placenta; Post-<br>partum                                         | NAAT                 | NR             |
| <b>Kacerovsky,<br/>2009</b> <sup>70</sup>                  | NR                | Case-<br>control | Pregnancy with PPROM, single<br>centre, Jan 2004 - Feb 2007.                                                | 450                      | PROM                 | Endocervical swab;<br>2 <sup>nd</sup> , 3 <sup>rd</sup> trimester | Culture              | NR             |

## Supporting information

| First author,<br>publication year,<br>study<br>reference*† | Country           | Study<br>design  | Study population                                                                     | Total<br>no. of<br>women | Outcomes<br>measured     | Specimen type;<br>collection time                            | Diagnostic<br>method | BV<br>assessed |
|------------------------------------------------------------|-------------------|------------------|--------------------------------------------------------------------------------------|--------------------------|--------------------------|--------------------------------------------------------------|----------------------|----------------|
| <b>Kafetzis, 2004</b> <sup>59</sup>                        | Greece            | Case-<br>control | Case: premature delivery;<br>control: term delivery from June<br>2000 to Dec 2001    | 251                      | PTB,<br>PROM,<br>PND     | Vaginal swab; 3 <sup>rd</sup><br>trimester                   | Culture              | NR             |
| <b>Kataoka, 2006</b> <sup>38</sup>                         | Japan             | Cohort           | Singleton pregnancies at <11<br>weeks of gestation, single<br>centre, Jan – Dec 2002 | 1040                     | PTB,<br>PROM,<br>SA, PND | Vaginal swab; 1 <sup>st</sup><br>trimester                   | NAAT                 | NR             |
| <b>Koucky, 2016</b> <sup>39</sup>                          | Czech<br>Republic | Cohort           | Threatened premature<br>deliveries, between Aug 2012 -<br>Feb 2013                   | 63                       | PTB                      | Vaginal swab; 2 <sup>nd</sup> ,<br>3 <sup>rd</sup> trimester | NAAT                 | NR             |
| <b>Kumar, 2006</b> <sup>71</sup>                           | India             | Case-<br>control | Women in spontaneous<br>premature/term labour with or                                | 120                      | PTB                      | Vaginal swab; 3 <sup>rd</sup><br>trimester                   | Culture              | Yes            |

Supporting information

| First author,<br>publication year,<br>study<br>reference*† | Country        | Study<br>design | Study population                                                                                     | Total<br>no. of<br>women | Outcomes<br>measured | Specimen type;<br>collection time          | Diagnostic<br>method | BV<br>assessed |
|------------------------------------------------------------|----------------|-----------------|------------------------------------------------------------------------------------------------------|--------------------------|----------------------|--------------------------------------------|----------------------|----------------|
|                                                            |                |                 | without rupture of membrane,<br>single centre                                                        |                          |                      |                                            |                      |                |
| <b>Kundsins, 1984<sup>75</sup></b>                         | USA            | Cross-sectional | Deliveries at single centre,<br>between Nov 1978 - Jun 1981                                          | 801                      | PND                  | Placenta; Post-partum                      | Culture              | NR             |
| <b>Kwak, 2014<sup>49</sup></b>                             | South<br>Korea | Cohort          | Women with spontaneous<br>premature labour or preterm<br>PROM, Dec 2005 – Apr 2007,<br>single centre | 179                      | PTB                  | Vaginal swab; 3 <sup>rd</sup><br>trimester | Culture              | NR             |
| <b>Lee, 2016<sup>6</sup></b>                               | South<br>Korea | Cohort          | Aged 15-47, delivered babies at<br>single centre between Jun 2009<br>- May 2014                      | 1,035                    | PTB,<br>PROM,<br>SA  | Vaginal swab; NR                           | Culture              | NR             |

## Supporting information

| First author,<br>publication year,<br>study<br>reference*† | Country   | Study<br>design | Study population                                                  | Total<br>no. of<br>women | Outcomes<br>measured | Specimen type;<br>collection time                                 | Diagnostic<br>method | BV<br>assessed |
|------------------------------------------------------------|-----------|-----------------|-------------------------------------------------------------------|--------------------------|----------------------|-------------------------------------------------------------------|----------------------|----------------|
| <b>Luton, 1994<sup>8</sup></b>                             | Gabon     | Cohort          | Singleton pregnancy at <20 weeks gestation, Sept 1990 to Nov 1991 | 218                      | PTB,<br>LBW,<br>PND  | Endocervical swab;<br>1 <sup>st</sup> , 2 <sup>nd</sup> trimester | Culture              | NR             |
| <b>McCormack, 1975<sup>76</sup></b>                        | USA       | Cross-sectional | Vaginal deliveries, single centre,                                | 327                      | LBW,<br>PND          | Blood; post-partum                                                | Culture              | NR             |
| <b>McDonald, 1992<sup>60</sup></b>                         | Australia | Case-control    | Women who booked at one of 4 study centres, Oct 1986 – Dec 1988   | 2190                     | PTB,<br>PROM         | Endocervical swab;<br>2 <sup>nd</sup> trimester                   | Culture              | NR             |
| <b>McDonald, 1994<sup>40</sup></b>                         | Australia | Cohort          | Patients attending the antenatal clinic,<br>Oct 1986 - May 1990   | 560                      | PTB                  | Endocervical swab;<br>2 <sup>nd</sup> , 3 <sup>rd</sup> trimester | Culture              | NR             |



Supporting information

| First author,<br>publication year,<br>study<br>reference*† | Country  | Study<br>design | Study population                                                                           | Total<br>no. of<br>women | Outcomes<br>measured | Specimen type;<br>collection time                              | Diagnostic<br>method | BV<br>assessed |
|------------------------------------------------------------|----------|-----------------|--------------------------------------------------------------------------------------------|--------------------------|----------------------|----------------------------------------------------------------|----------------------|----------------|
| <b>Menard, 2010<sup>41</sup></b>                           | France   | Cohort          | Admitted preterm labour with no pregnancy related complications from July 2007 - July 2008 | 90                       | PTB                  | Vaginal swab; 2 <sup>nd</sup> , 3 <sup>rd</sup> trimester      | NAAT                 | Yes            |
| <b>Minkoff, 1984<sup>42</sup></b>                          | USA      | Cohort          | Attending single centre, for delivery between Mar - Sept 1982                              | 250                      | PTB,<br>PROM         | Vaginal swab; 1 <sup>st</sup> , 2 <sup>nd</sup> trimester      | Culture              | NR             |
| <b>Mitsunari, 2005<sup>61</sup></b>                        | Japan    | Case-control    | Singleton pregnancy delivery, between Jan 2002 - Sept 2003                                 | 82                       | PTB,<br>PROM         | Endocervical swab; 2 <sup>nd</sup> , 3 <sup>rd</sup> trimester | NAAT                 | NR             |
| <b>Montenegro, 2019<sup>72</sup></b>                       | Colombia | Case-control    | Pregnant women >18 years, no pregnancy related problems,                                   | 211                      | PTB,<br>PROM         | Placenta; Post-partum                                          | NAAT                 | NR             |

## Supporting information

| First author,<br>publication year,<br>study<br>reference*† | Country           | Study<br>design     | Study population                                                                                                                     | Total<br>no. of<br>women | Outcomes<br>measured | Specimen type;<br>collection time                                 | Diagnostic<br>method | BV<br>assessed |
|------------------------------------------------------------|-------------------|---------------------|--------------------------------------------------------------------------------------------------------------------------------------|--------------------------|----------------------|-------------------------------------------------------------------|----------------------|----------------|
|                                                            |                   |                     | non-smokers, no alcohol, no<br>antibiotic                                                                                            |                          |                      |                                                                   |                      |                |
| <b>Munday, 1984</b> <sup>62</sup>                          | United<br>Kingdom | Case-<br>control    | Women admitted with vaginal<br>bleeding before 28 weeks<br>gestation and women attending<br>one antenatal clinic at same<br>hospital | 241                      | SA                   | Endocervical swab;<br>2 <sup>nd</sup> , 3 <sup>rd</sup> trimester | Culture              | NR             |
| <b>Nasution, 2007</b> <sup>78</sup>                        | NR                | Cross-<br>sectional | Women admitted with preterm<br>PROM (<37weeks), normal<br>vaginal deliveries at term, and<br>women with post-partum fever            | 120                      | PROM                 | Placenta; Post-<br>partum                                         | NAAT                 | NR             |

Supporting information

| First author,<br>publication year,<br>study<br>reference*† | Country         | Study<br>design  | Study population                                                                                                     | Total<br>no. of<br>women | Outcomes<br>measured | Specimen type;<br>collection time                                                   | Diagnostic<br>method | BV<br>assessed |
|------------------------------------------------------------|-----------------|------------------|----------------------------------------------------------------------------------------------------------------------|--------------------------|----------------------|-------------------------------------------------------------------------------------|----------------------|----------------|
| Nguyen, 2004 <sup>43</sup>                                 | Switzerland     | Cohort           | Women with transabdominal<br>amniocentesis at 15-17 weeks<br>gestation, single centre                                | 456                      | PTB,<br>PROM,<br>PND | Amniotic fluid; 2 <sup>nd</sup><br>trimester                                        | NAAT                 | NR             |
| Odendaal, 2002 <sup>50</sup>                               | South<br>Africa | Cohort           | Primigravid, first visit, 16-26<br>weeks with previous preterm<br>labour or miscarriage, May-Dec<br>1996             | 395                      | PTB, SA,<br>PND      | Endocervical swab;<br>2 <sup>nd</sup> trimester                                     | Culture              | Yes            |
| Oliveira, 2020 <sup>7</sup>                                | Brazil          | Case-<br>control | > 18 years old, cases: 8 -20<br>weeks gestation; Control<br>vaginal delivery at 38-40 weeks,<br>Jul 2017 – Aug 2018, | 109                      | SA                   | Endocervical swab;<br>1 <sup>st</sup> , 2 <sup>nd</sup> , 3 <sup>rd</sup> trimester | NAAT                 | NR             |

## Supporting information

| First author,<br>publication year,<br>study<br>reference*† | Country                | Study<br>design  | Study population                                                                                            | Total<br>no. of<br>women | Outcomes<br>measured | Specimen type;<br>collection time                                              | Diagnostic<br>method | BV<br>assessed |
|------------------------------------------------------------|------------------------|------------------|-------------------------------------------------------------------------------------------------------------|--------------------------|----------------------|--------------------------------------------------------------------------------|----------------------|----------------|
| <b>Payne, 2014</b> <sup>63</sup>                           | China and<br>Australia | Case-<br>control | Singleton pregnancy referred for<br>genetic amniocentesis                                                   | 972                      | PTB                  | Amniotic fluid; 2 <sup>nd</sup><br>trimester                                   | NAAT                 | NR             |
| <b>Payne, 2016</b> <sup>44</sup>                           | Australia              | Cohort           | Low risk singleton pregnancy,<br>18-40 years old, at 1st or 2nd<br>trimester when enrolled                  | 191                      | PTB                  | Vaginal swab; 1 <sup>st</sup> ,<br>2 <sup>nd</sup> , 3 <sup>rd</sup> trimester | NAAT,<br>Culture     | NR             |
| <b>Payne, 2021</b> <sup>45</sup>                           | Australia              | Cohort           | Nulliparous and multiparous,<br>singleton pregnancy, ≥16 years<br>between 12 - 23 weeks gestation           | 1000                     | PTB                  | Vaginal swab; 1 <sup>st</sup> ,<br>2 <sup>nd</sup> trimester                   | NAAT                 | NR             |
| <b>Peretz, 2020</b> <sup>12</sup>                          | Israel                 | Cohort           | Women, 18-45 years, at any<br>stage of labor and any mode of<br>delivery, between Jun 2014 and<br>Jan 2016. | 214                      | PTB,<br>LBW          | Vaginal swab; post-<br>partum                                                  | NAAT                 | NR             |

Supporting information

| First author,<br>publication year,<br>study<br>reference*† | Country | Study<br>design | Study population                                                                                     | Total<br>no. of<br>women | Outcomes<br>measured | Specimen type;<br>collection time                              | Diagnostic<br>method | BV<br>assessed |
|------------------------------------------------------------|---------|-----------------|------------------------------------------------------------------------------------------------------|--------------------------|----------------------|----------------------------------------------------------------|----------------------|----------------|
| <b>Perni, 2004</b> <sup>51</sup>                           | Unknown | Cohort          | Singleton pregnancy: underwent transabdominal amniocentesis at 15-19 weeks with clear amniotic fluid | 193                      | PTB,<br>PROM         | Amniotic fluid; 2 <sup>nd</sup> trimester                      | NAAT                 | NR             |
| <b>Povlsen, 2001</b> <sup>64</sup>                         | Denmark | Case-control    | Singleton, single centre; attending first antenatal visit between Nov 1992 - Feb 1994                | 484                      | PTB,<br>LBW          | Endocervical swab; 1 <sup>st</sup> , 2 <sup>nd</sup> trimester | NAAT                 | Yes            |
| <b>Rittenschober-Böhm, 2018</b> <sup>46</sup>              | Austria | Cohort          | Attending routine nuchal translucency screening between 12-14 weeks gestation, multicentre study     | 4330                     | PTB                  | Endocervical swab; 1 <sup>st</sup> , 2 <sup>nd</sup> trimester | NAAT                 | Yes            |

## Supporting information

| First author,<br>publication year,<br>study<br>reference*† | Country   | Study<br>design     | Study population                                                                                            | Total<br>no. of<br>women | Outcomes<br>measured | Specimen type;<br>collection time          | Diagnostic<br>method | BV<br>assessed |
|------------------------------------------------------------|-----------|---------------------|-------------------------------------------------------------------------------------------------------------|--------------------------|----------------------|--------------------------------------------|----------------------|----------------|
| <b>Schwab, 2015</b> <sup>52</sup>                          | Indonesia | Cohort              | 2nd trimester, four centres, from<br>Feb -Jun 2005                                                          | 159                      | PTB                  | Vaginal swab; 2 <sup>nd</sup><br>trimester | NAAT                 | Yes            |
| <b>Sperling, 1988</b> <sup>48</sup>                        | USA       | Cohort              | Clinical diagnosis of<br>intraamniotic infection, July<br>1979 – Dec 1986                                   | 409                      | LBW                  | Amniotic fluid; NR                         | Culture              | NR             |
| <b>Sweeney, 2016</b> <sup>77</sup>                         | USA       | Cross-<br>sectional | Term deliveries, no HIV<br>infection, congenital infection,<br>or fetal malformation, Jul 2010–<br>Apr 2013 | 535                      | PTB                  | Placenta; Post-<br>partum                  | NAAT,<br>Culture     | NR             |
| <b>Toth, 1992</b> <sup>65</sup>                            | UK        | Case-<br>control    | Admitted for delivery between<br>Jan 1985 - Dec 1986                                                        | 100                      | PTB                  | Endocervical swab;<br>NR                   | Culture              | NR             |

Supporting information

| First author,<br>publication year,<br>study<br>reference*† | Country        | Study<br>design  | Study population                                                               | Total<br>no. of<br>women | Outcomes<br>measured | Specimen type;<br>collection time                                 | Diagnostic<br>method | BV<br>assessed |
|------------------------------------------------------------|----------------|------------------|--------------------------------------------------------------------------------|--------------------------|----------------------|-------------------------------------------------------------------|----------------------|----------------|
| Usui, 2002 <sup>47</sup>                                   | Japan          | Cohort           | Singleton pregnancy attending<br>first antenatal visit,<br>Jan 1995 – Mar 1998 | 1958                     | PTB                  | Endocervical swab;<br>1 <sup>st</sup> , 3 <sup>rd</sup> trimester | Culture              | NR             |
| Yoon, 2001 <sup>66</sup>                                   | South<br>Korea | Case-<br>control | Women who underwent mid-<br>trimester amniocentesis                            | 114                      | PTB,<br>PROM         | Amniotic fluid; 2 <sup>nd</sup><br>trimester                      | NAAT                 | NR             |

**Abbreviations:** LBW, infant low birth weight, defined as birth weight <2.5kg; NAAT, nucleic acid amplification tests; NR, not reported; PTB, preterm birth - defined as birth before 37 weeks gestation; PROM: premature rupture of membrane- defined as clinically confirmed rupture of membrane before 37weeks of gestation; PND, perinatal death- defined as stillbirth (death after 20/40 gestation) or neonatal death (death <28 day since birth), unless otherwise defined by the study authors; SA: spontaneous abortion - defined as pregnancy loss at <20 weeks gestation or as defined by author

Diagnostic method: a) Mycofast All-in test; b) A7/ A8 culture media; c) Mycoplasma IST-2 kit

USA, United States of America; UK, United Kingdom.

\* Study reference is the reference number cited in the main manuscript

† Additional summary information about the characteristics of included studies in Tables S3.1-S3.3, S4.1-S4.3, S5.1-S5.3

## Supporting information

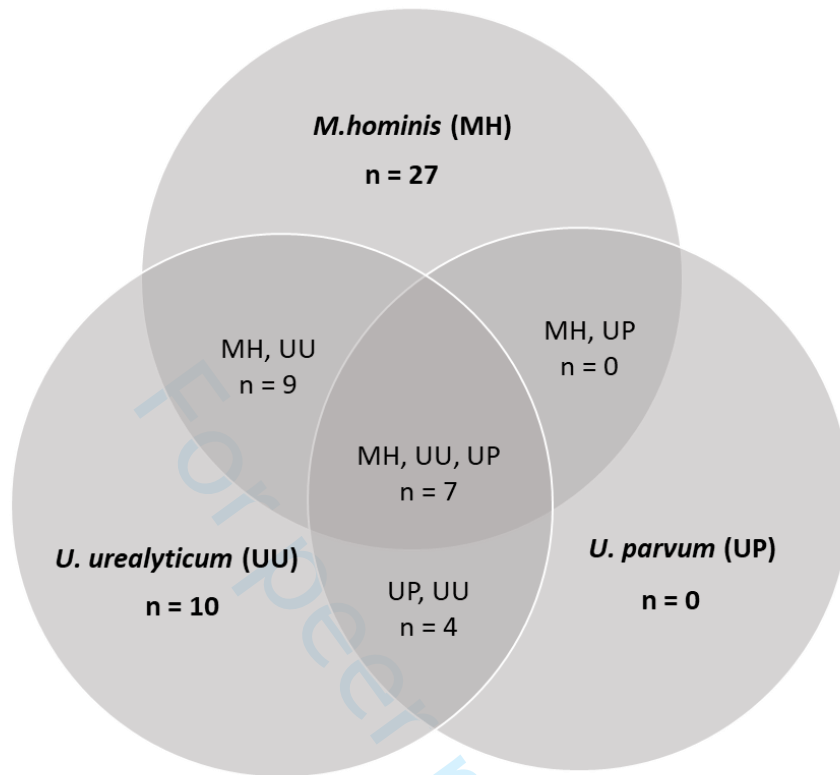

**Figure S2** Venn diagram showing organisms reported in in the 57 articles included in the systematic review.



## Supporting information

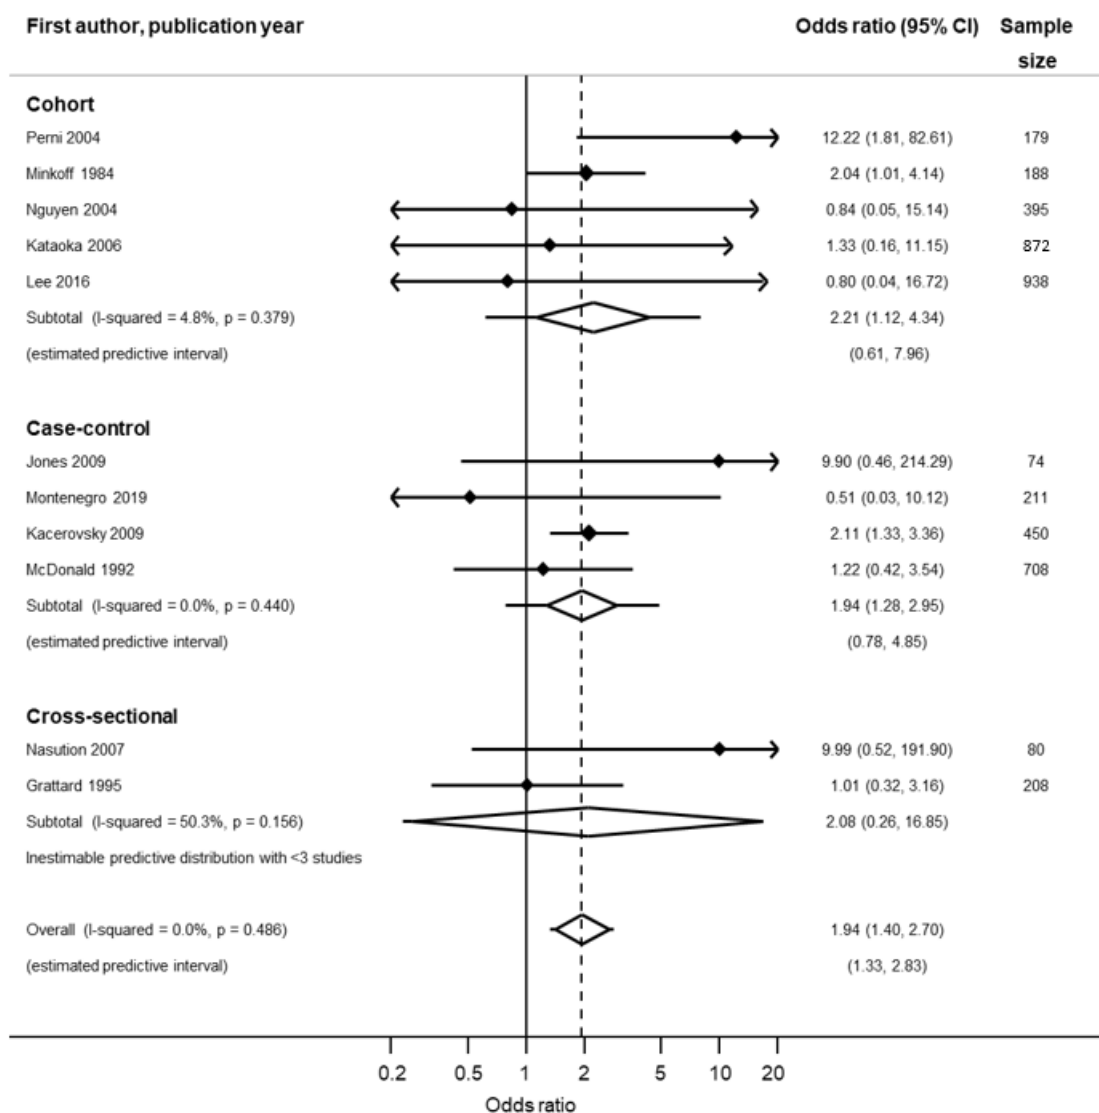

**Figure S3.1** Forest plot of association between *M. hominis* and premature rupture of membrane, random effects model.

Solid diamond shows the point estimate and study weight. Solid line shows 95% confidence intervals (CI) for each study. The open diamond shows the point estimate and 95% CI of the summary estimate. Solid lines extending from the diamond show the prediction interval.

Supporting information

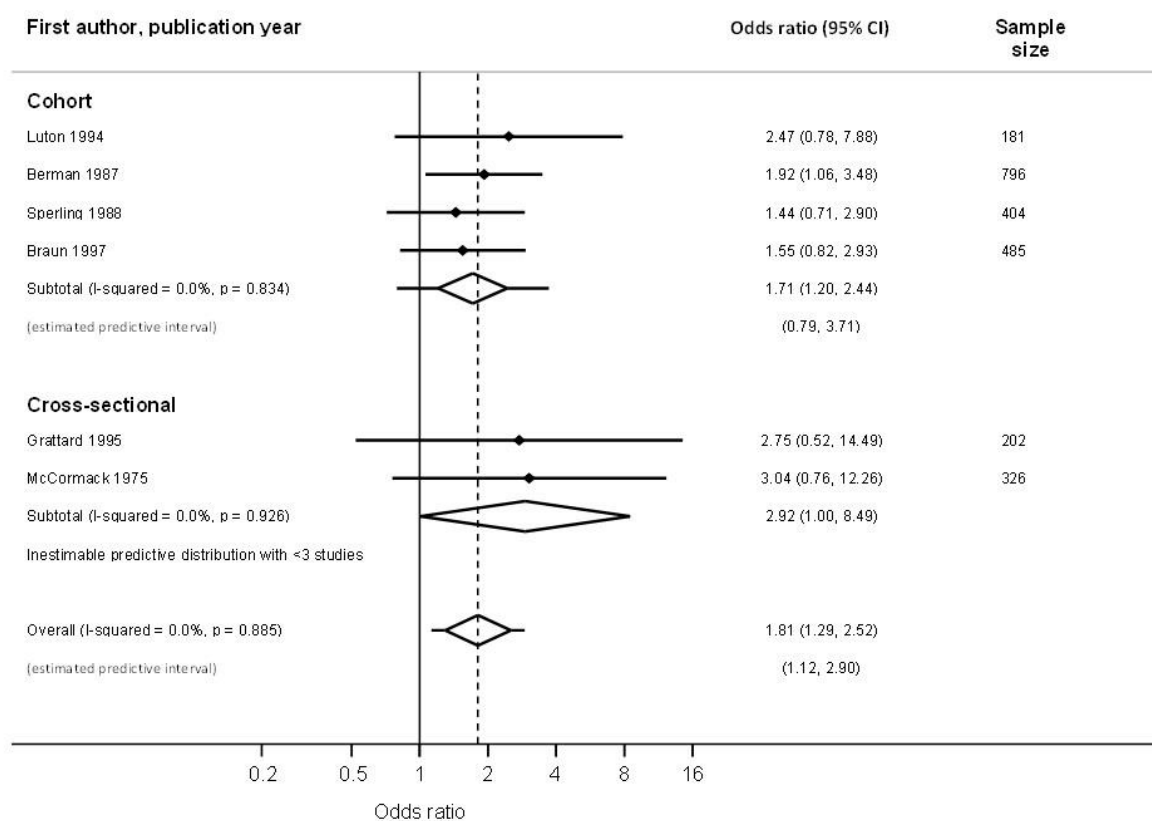

**Figure S3.2** Forest plot of association between *M. hominis* and low birthweight, random effects model.

Solid diamond shows the point estimate and study weight. Solid line shows 95% confidence intervals (CI) for each study. The open diamond shows the point estimate and 95% CI of the summary estimate. Solid lines extending from the diamond show the prediction interval.

## Supporting information

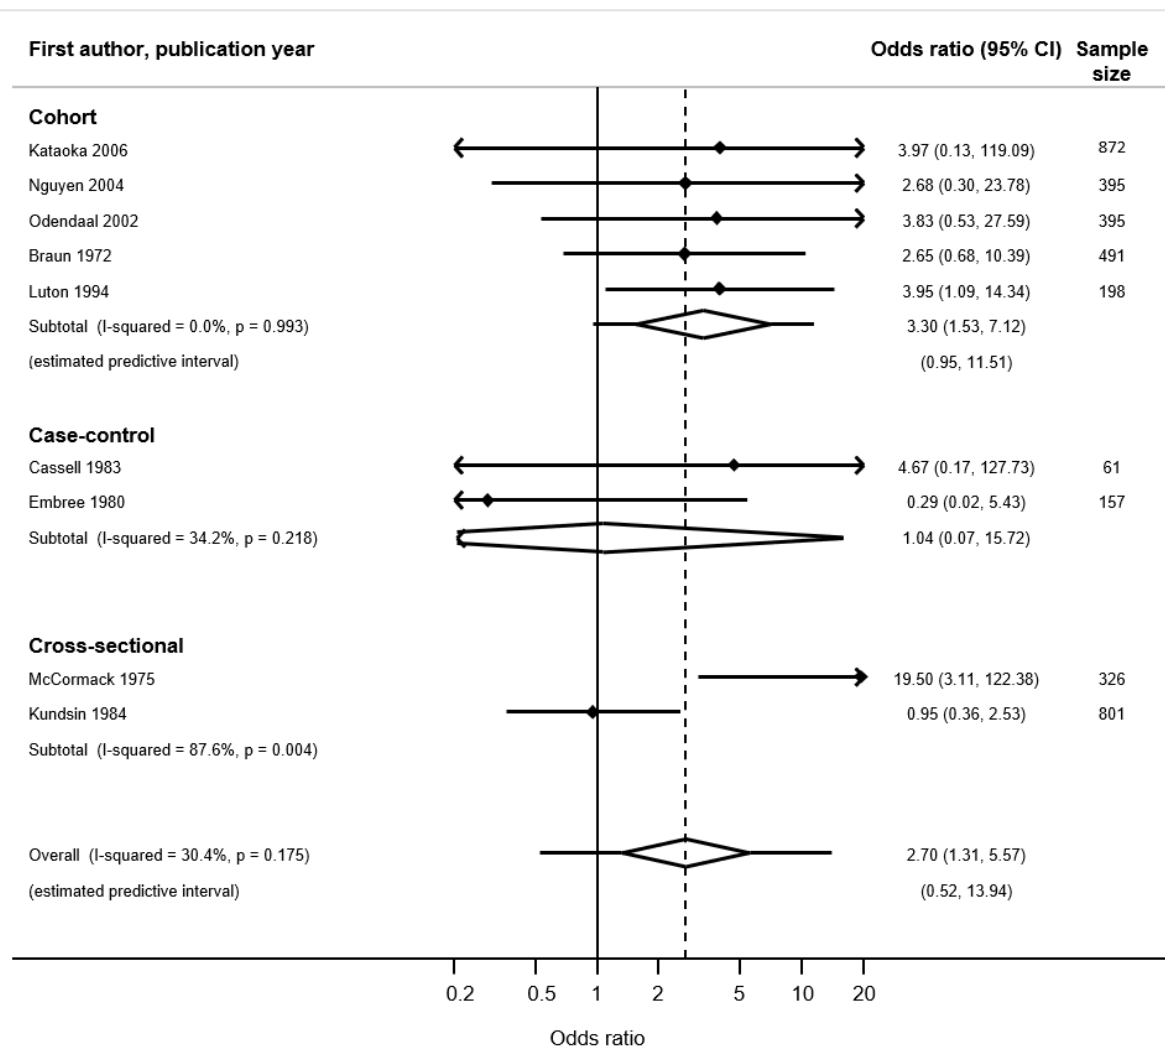

**Figure S3.3** Forest plot of association between *M. hominis* and perinatal death random effects model.

Solid diamond shows the point estimate and study weight. Solid line shows 95% confidence intervals (CI) for each study. The open diamond shows the point estimate and 95% CI of the summary estimate. Solid lines extending from the diamond show the prediction interval.

Supporting information

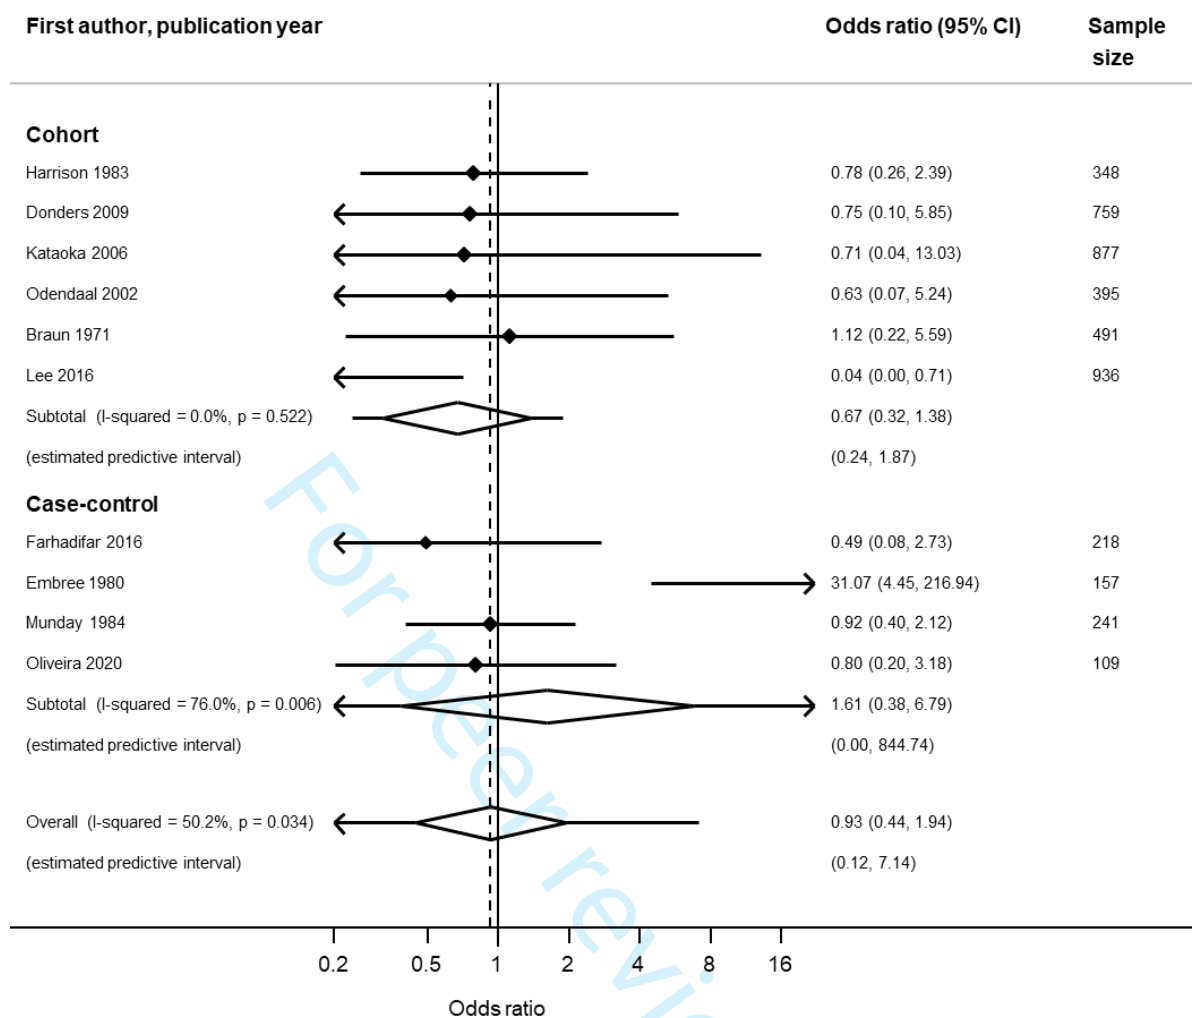

**Figure S3.4** Forest plot of association between *M. hominis* and spontaneous abortion random effects model.

Solid diamond shows the point estimate and study weight. Solid line shows 95% confidence intervals (CI) for each study. The open diamond shows the point estimate and 95% CI of the summary estimate. Solid lines extending from the diamond show the prediction interval.

## Supporting information

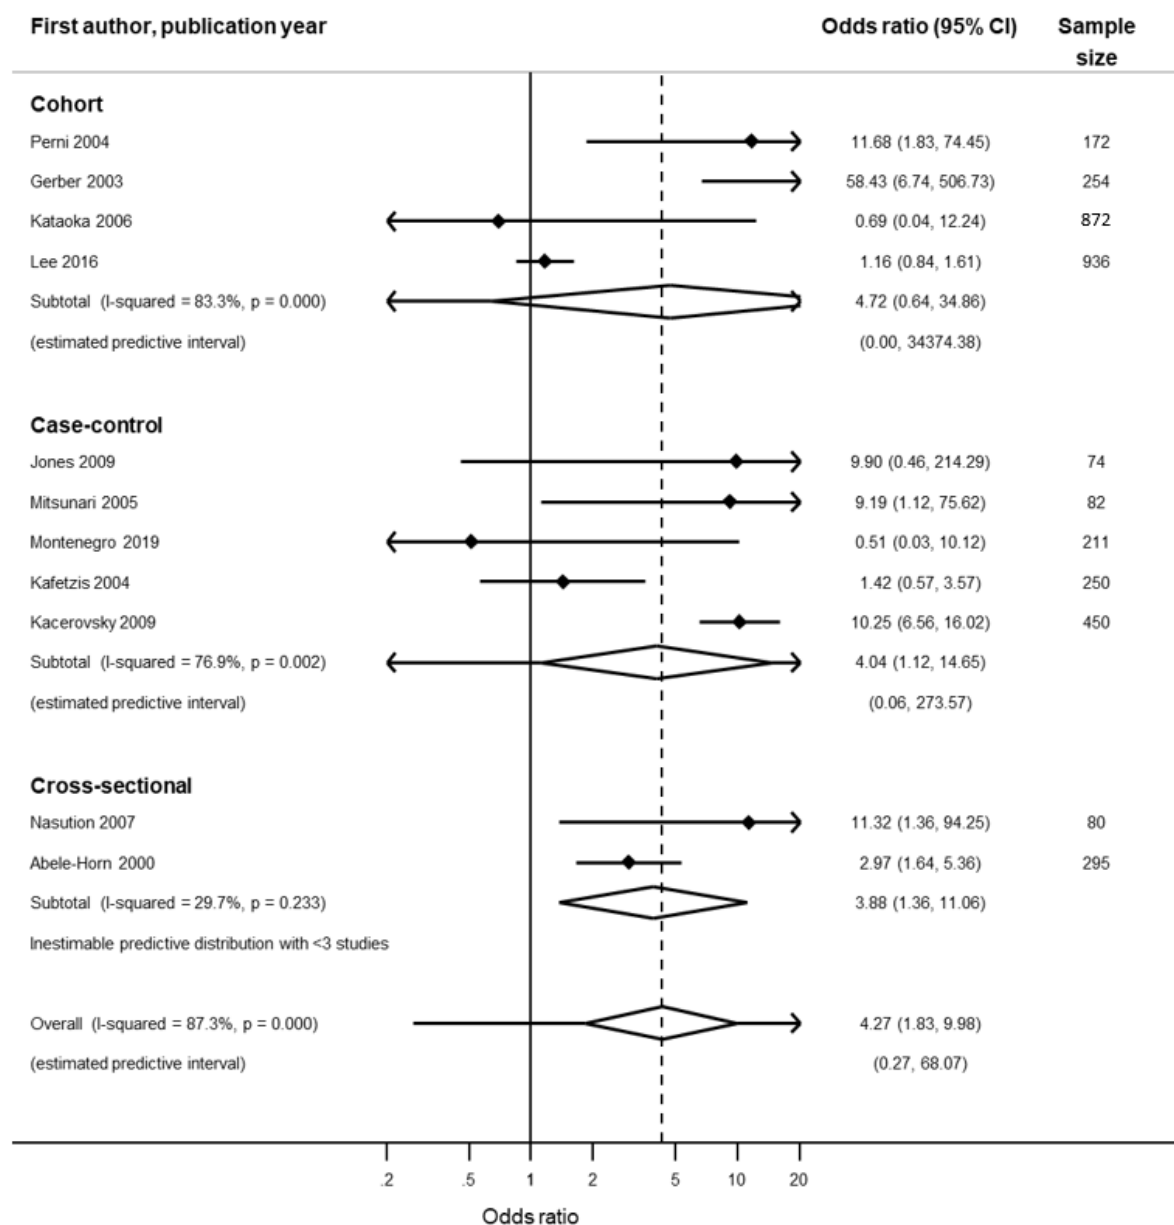

**Figure S4.1** Forest plot of association between *U. urealyticum* and premature rupture of membrane, random effects model.

Solid diamond shows the point estimate and study weight. Solid line shows 95% confidence intervals (CI) for each study. The open diamond shows the point estimate and 95% CI of the summary estimate. Solid lines extending from the diamond show the prediction interval.

Supporting information

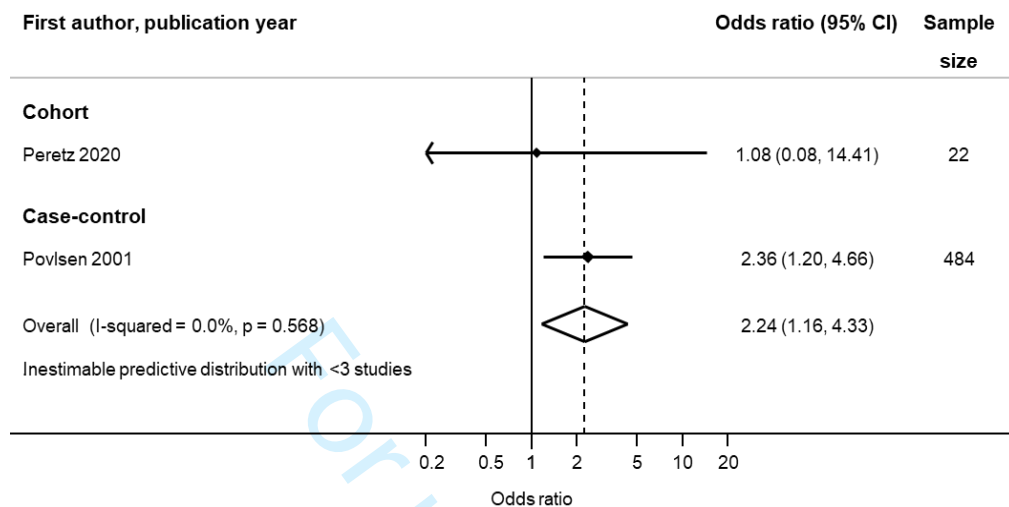

**Figure S4.2** Forest plot of association between *U. urealyticum* and low birth weight, random effects model.

Solid diamond shows the point estimate and study weight. Solid line shows 95% confidence intervals (CI) for each study. The open diamond shows the point estimate and 95% CI of the summary estimate. Solid lines extending from the diamond show the prediction interval.

## Supporting information

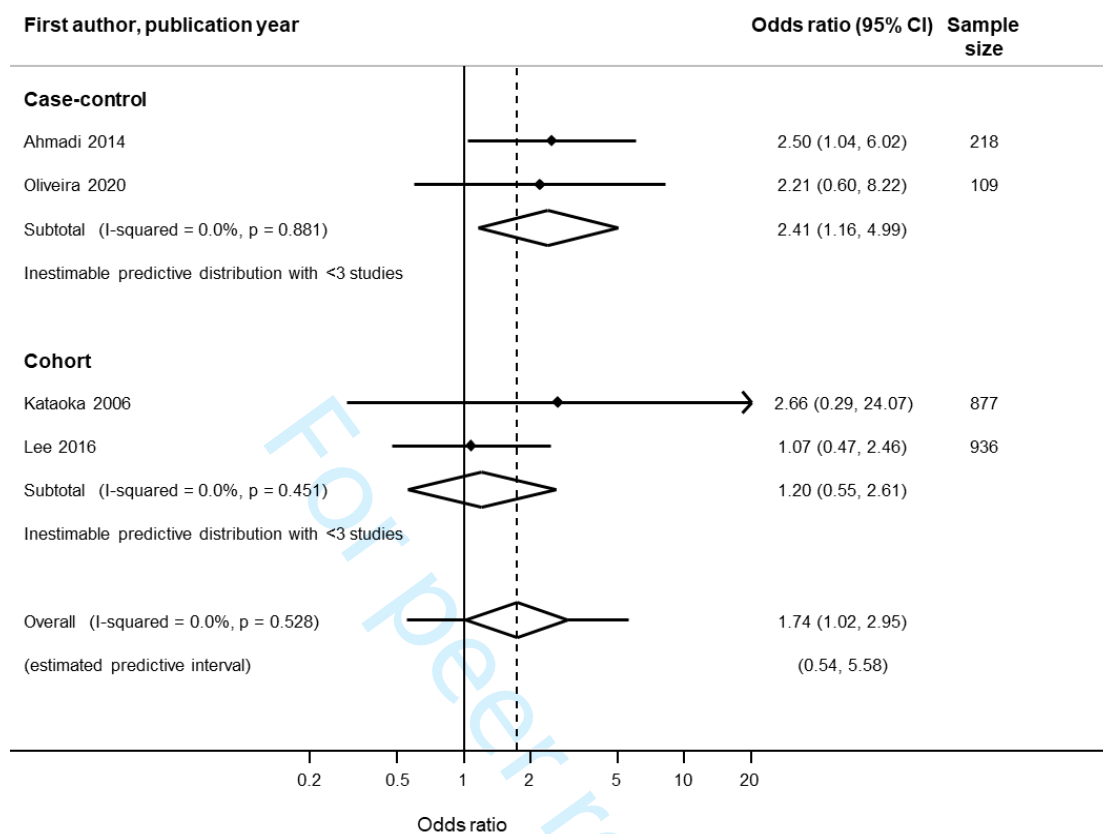

**Figure S4.3** Forest plot of association between *U. urealyticum* and spontaneous abortion, random effects model

Solid diamond shows the point estimate and study weight. Solid line shows 95% confidence intervals (CI) for each study. The open diamond shows the point estimate and 95% CI of the summary estimate. Solid lines extending from the diamond show the prediction interval.

Supporting information

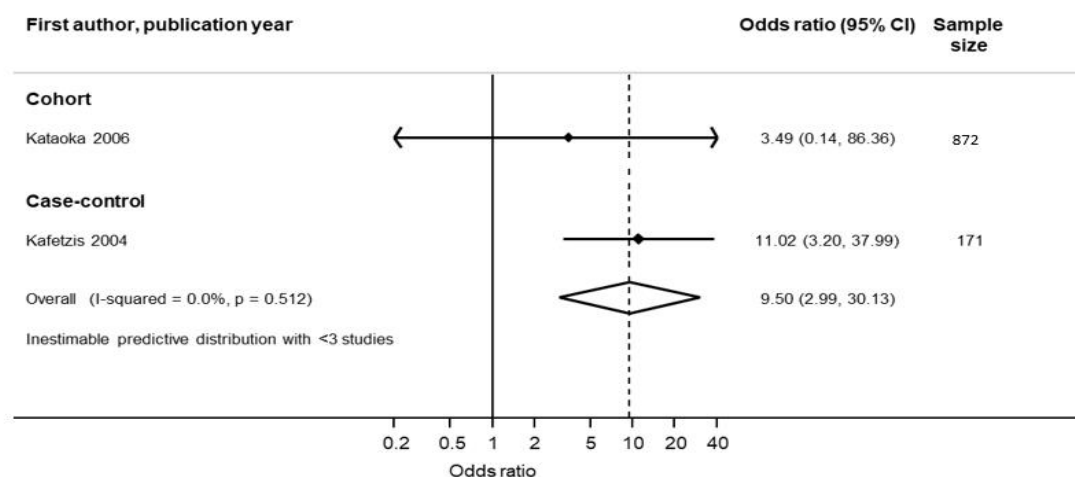

**Figure S4.4** Forest plot of association between *U. urealyticum* and perinatal death, random effects model. Solid diamond shows the point estimate and study weight. Solid line shows 95% confidence intervals (CI) for each study. The open diamond shows the point estimate and 95% CI of the summary estimate. Solid lines extending from the diamond show the prediction interval.



## Supporting information

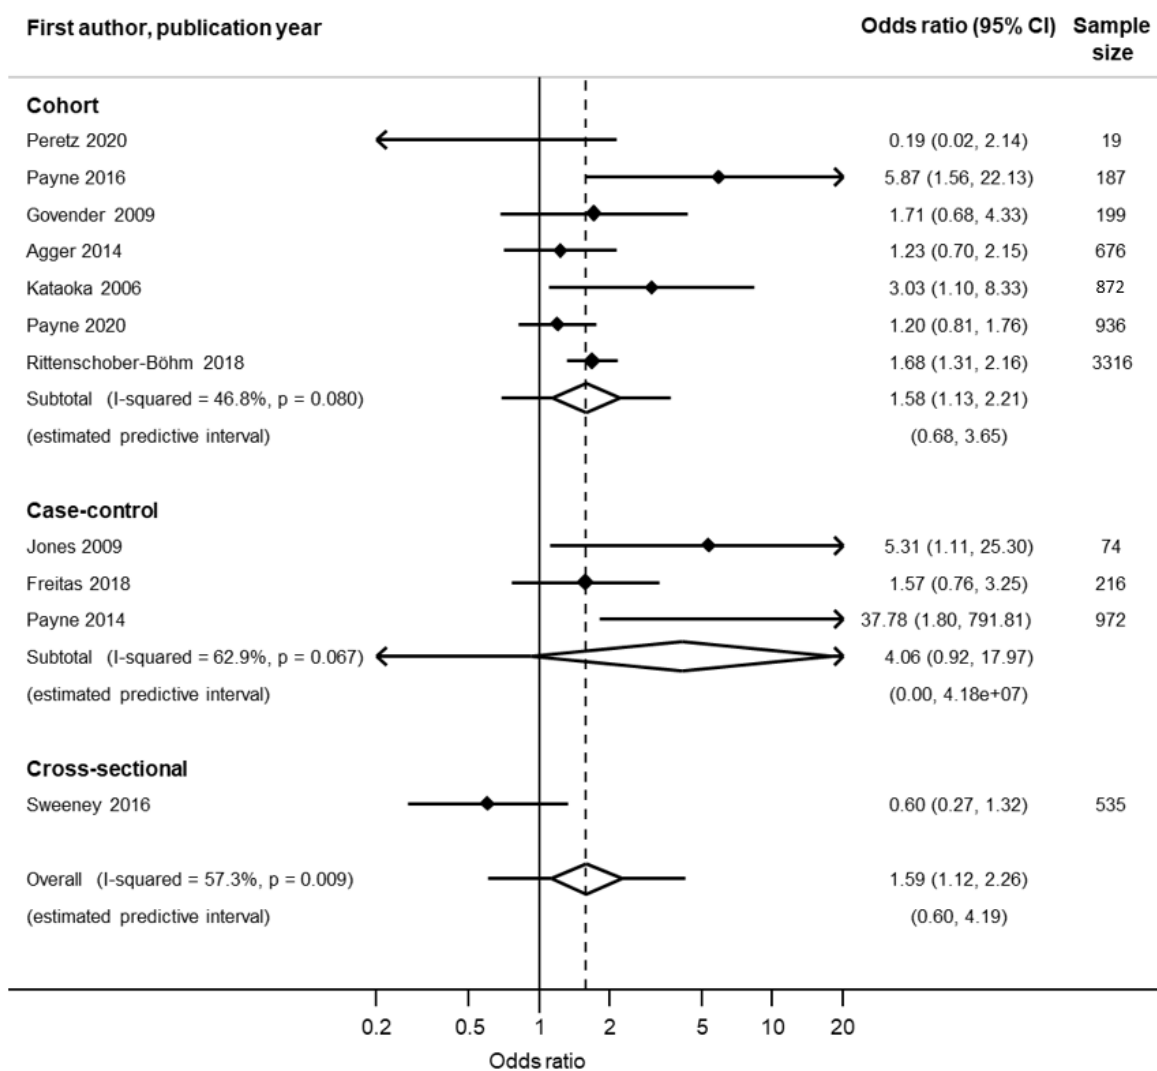

**Figure S5.1** Forest plot of association between *U. parvum* and preterm birth, random effects model.

Solid diamond shows the point estimate and study weight. Solid line shows 95% confidence intervals (CI) for each study. The open diamond shows the point estimate and 95% CI of the summary estimate. Solid lines extending from the diamond show the prediction interval.

## Supporting information

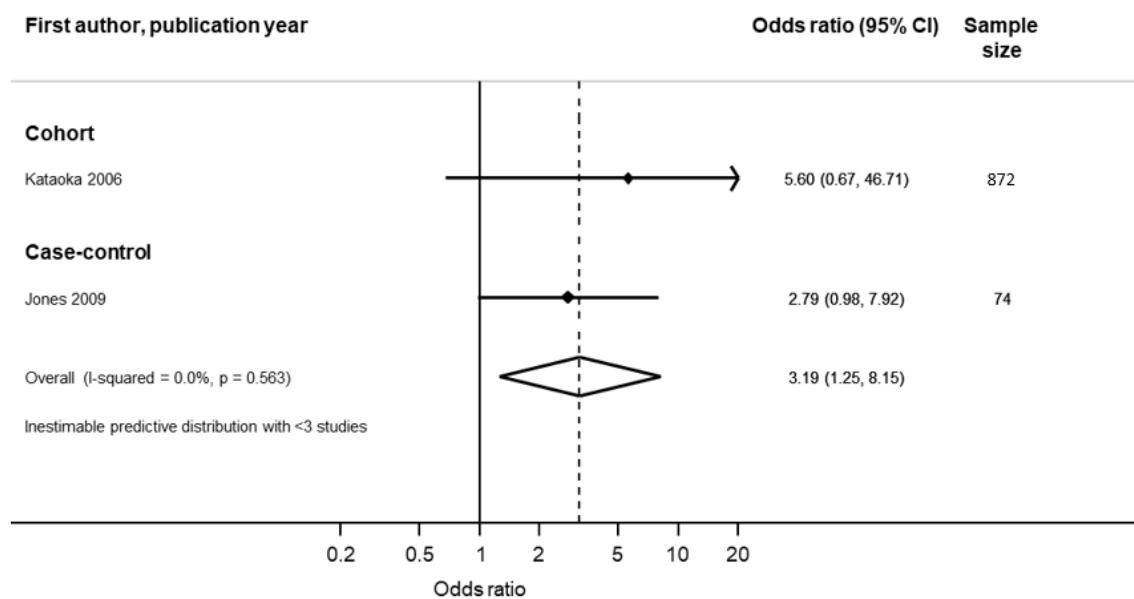

**Figure S5.2** Forest plot of association between *U. parvum* and premature rupture of membrane, random effects model.

Solid diamond shows the point estimate and study weight. Solid line shows 95% confidence intervals (CI) for each study. The open diamond shows the point estimate and 95% CI of the summary estimate. Solid lines extending from the diamond show the prediction interval.

## Supporting information

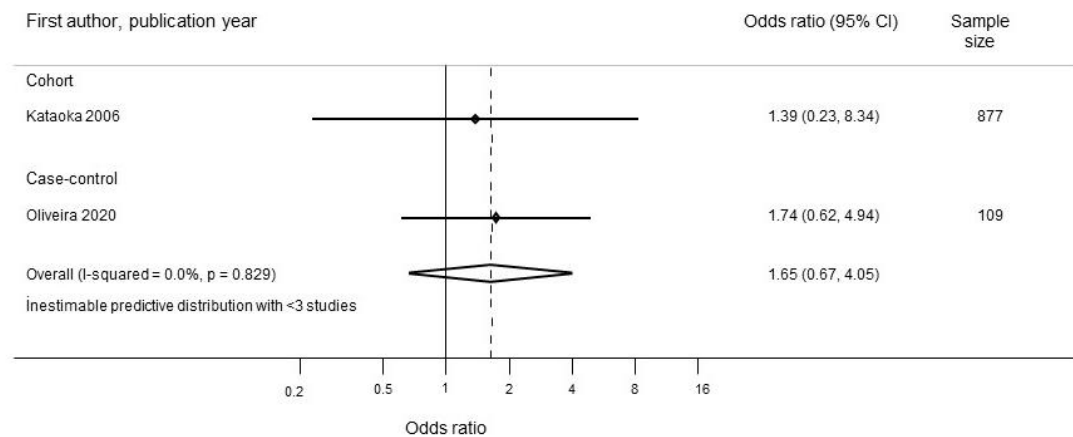

**Figure S5.3** Forest plot of association between *U. parvum* and spontaneous abortion random effects model

Solid diamond shows the point estimate and study weight. Solid line shows 95% confidence intervals (CI) for each study. The open diamond shows the point estimate and 95% CI of the summary estimate. Solid lines extending from the diamond show the prediction interval.

**Table S2** Summary of assessment of funnel plot asymmetry, for outcomes reported in 10 or more studies

| Organism              | Outcome | Egger test (95% CI)* | P value |
|-----------------------|---------|----------------------|---------|
| <i>M. hominis</i>     | PTB     | 0.56 (-0.08, 1.2)    | 0.09    |
|                       | PROM    | 0.05 (-1.07, 1.17)   | 0.92    |
|                       | SA      | -0.28 (-3.20, 2.64)  | 0.83    |
| <i>U. urealyticum</i> | PTB     | 0.89 (-0.15, 1.93)   | 0.09    |
|                       | PROM    | 1.2 (-1.7, 4.09)     | 0.37    |
| <i>U. parvum</i>      | PTB     | 0.53 (-1.27, 2.34)   | 0.52    |

**Abbreviations:** CI, confidence interval; PND: perinatal death; PTB: preterm birth; PROM: premature rupture of membrane; S: spontaneous abortion

\* Egger test for small-study effects

## Supporting information

**Table S3.1** Descriptive tables: Cohort studies (n=26)

| First author,<br>publication<br>year | Organism<br>reported | Outcomes | Definition<br>Provided | OR/ RR (95% CI) reported in by study authors |                      |                                                                                                                                                                                 |
|--------------------------------------|----------------------|----------|------------------------|----------------------------------------------|----------------------|---------------------------------------------------------------------------------------------------------------------------------------------------------------------------------|
|                                      |                      |          |                        | Organism_<br>outcome                         | Unadjusted, OR       | Adjusted, aOR                                                                                                                                                                   |
| Agger, 2014                          | MH, UU, UP           | PTB      | Born < 37 weeks        | MH_PTB                                       | OR 1.72 (0.91, 3.28) | 'Final model... factors... from preliminary models with p>0.15.' No organism in final multivariable model for PTB <37 weeks. MH in final model PTB< 35 weeks, aOR 3.6 (1.4-9.7) |
|                                      |                      |          |                        | UU_PTB                                       | OR 1.64 (0.67, 4.05) |                                                                                                                                                                                 |
|                                      |                      |          |                        | UP_PTB                                       | OR 1.23 (0.7, 2.15)  |                                                                                                                                                                                 |
| Berman, 1987                         | MH                   | LBW      | <2.5kg                 | MH_LBW                                       | RR 1.8 (1.0-3.1)     | Birth weight as continuous variable, p=0.01, adjusted for parity, maternal height, weight, marital status, age, enrolment, gestation, <i>C. trachomatis</i>                     |
| Braun, 1971                          | MH                   | LBW      | <2.5kg                 |                                              |                      | No multivariable analysis                                                                                                                                                       |
|                                      |                      | SA       | Not defined            | NR                                           |                      |                                                                                                                                                                                 |
|                                      |                      | PND      | Not defined            |                                              |                      |                                                                                                                                                                                 |
| Donders, 2009                        | MH                   | PTB      | Born < 37 weeks        | MH_PTB                                       | OR 8.5 (2.8, 25.5)   | No multivariable analysis                                                                                                                                                       |
|                                      |                      | SA       | **                     |                                              |                      |                                                                                                                                                                                 |

Supporting information

| First author, publication year | Organism reported | Outcomes                    | Definition Provided                       | OR/ RR (95% CI) reported in by study authors |                                                                                                              |
|--------------------------------|-------------------|-----------------------------|-------------------------------------------|----------------------------------------------|--------------------------------------------------------------------------------------------------------------|
|                                |                   |                             |                                           | Organism_ Unadjusted, OR outcome             | Adjusted, aOR                                                                                                |
| Gerber, 2003                   | UU                | PTB<br>PROM                 | Born < 37 weeks<br>†                      | NR                                           | No multivariable analysis                                                                                    |
| Govender, 2009                 | MH, UU, UP        | PTB                         | Born < 37 weeks                           | NR                                           | No multivariable analysis                                                                                    |
| Harrison, 1983                 | MH                | SA                          | **                                        | NR                                           | No multivariable analysis                                                                                    |
| Hillier, 1995                  | MH                | PTB                         | Born < 37 weeks                           | MH_PT                                        | No multivariable analysis                                                                                    |
| Kataoka, 2006                  | MH, UU, UP        | PTB,<br>PROM,<br>SA,<br>PND | Born < 37 weeks<br>Not defined<br>**<br>∞ | NR                                           | No multivariable analysis                                                                                    |
| Koucky, 2016                   | UU                | PTB                         | Born < 37 weeks                           | NR                                           | aOR 3.4 (1.3, 5.5)<br><br>Adjusted for progesterone treatment, other factors not reported 5.46 (1.80, 16.62) |

## Supporting information

| First author,<br>publication<br>year | Organism<br>reported | Outcomes | Definition<br>Provided | OR/ RR (95% CI) reported in by study authors |                                                    |
|--------------------------------------|----------------------|----------|------------------------|----------------------------------------------|----------------------------------------------------|
|                                      |                      |          |                        | Organism_<br>outcome                         | Unadjusted, OR<br>Adjusted, aOR                    |
| Kwak, 2014                           | MH, UU               | PTB      | Born < 37 weeks        | NR                                           | No multivariable analysis                          |
| Lee, 2016                            | MH, UU               | PTB      | Born < 37 weeks        | NR                                           | No multivariable analysis                          |
|                                      |                      | PROM     | Not defined            |                                              |                                                    |
|                                      |                      | SA       | **                     |                                              |                                                    |
| Luton, 1994                          | MH                   | PTB      | Born < 37 weeks        | NR                                           | No multivariable analysis                          |
|                                      |                      | LBW      | <2.5kg                 |                                              |                                                    |
|                                      |                      | PND      | ∞                      |                                              |                                                    |
| McDonald,<br>1994                    | MH                   | PTB      | Born < 37 weeks        | NR                                           | No multivariable analysis                          |
| Menard, 2010                         | MH                   | PTB      | Born < 37 weeks        | NR                                           |                                                    |
| Minkoff, 1984                        | MH                   | PTB      | Born < 37 weeks        | NR                                           | Stepwise multiple logistic regression. Results for |
|                                      |                      | PROM     | †                      |                                              | MH not reported for either outcome                 |

## Supporting information

| First author, publication year | Organism reported | Outcomes | Definition Provided | OR/ RR (95% CI) reported in by study authors |                    |                           |
|--------------------------------|-------------------|----------|---------------------|----------------------------------------------|--------------------|---------------------------|
|                                |                   |          |                     | Organism_ outcome                            | Unadjusted, OR     | Adjusted, aOR             |
| Nguyen, 2004                   | MH                | PTB      | Born < 37 weeks     | MH_PTB                                       | RR 4.6 (1.7, 12.8) | No multivariable analysis |
|                                |                   | PROM     | †                   |                                              |                    |                           |
|                                |                   | PND      | Not defined         |                                              |                    |                           |
| Odendaal, 2002                 | MH                | PTB      | Born < 37 weeks     | NR                                           |                    | No multivariable analysis |
|                                |                   | SA,      | **                  |                                              |                    |                           |
|                                |                   | PND      | Not defined         |                                              |                    |                           |
| Payne, 2016                    | MH, UU, UP        | PTB      | Born < 37 weeks     | NR                                           |                    | No multivariable analysis |
| Payne, 2020                    | MH, UU, UP        | PTB      | Born < 37 weeks     | NR                                           |                    | No multivariable analysis |
| Peretz, 2020                   | UU, UP            | PTB,     | Born < 37 weeks     | NR                                           |                    | No multivariable analysis |
|                                |                   | LBW      | <2.5kg              |                                              |                    |                           |
| Perni, 2004                    | MH, UU            | PTB,     | Born < 37 weeks     | NR                                           |                    |                           |
|                                |                   | PROM     | †                   |                                              |                    |                           |

## Supporting information

| First author, publication year | Organism reported | Outcomes | Definition Provided | OR/ RR (95% CI) reported in by study authors |                                  |                                                                                                    |
|--------------------------------|-------------------|----------|---------------------|----------------------------------------------|----------------------------------|----------------------------------------------------------------------------------------------------|
|                                |                   |          |                     | Organism_ outcome                            | Unadjusted, OR                   | Adjusted, aOR                                                                                      |
| Rittenschober-Bohm, 2018       | UU, UP            | PTB      | Born < 37 weeks     | UU_PTB                                       | OR 1.4 (0.9, 2.3)                | aOR 1.4 (0.8, 2.2)                                                                                 |
|                                |                   |          |                     | UP_PTB                                       | OR 1.7 (1.3, 2.2)                | aOR 1.6 (1.2, 2.1)                                                                                 |
|                                |                   |          |                     |                                              |                                  | Adjusted for age, smoking, history of PTB, BV, smoking UU or UP                                    |
| Schwab, 2015                   | MH, UU            | PTB      | Born < 37 weeks     | MH_PTB                                       | OR 0.26 (0.03, 1.13)             | No multivariable analysis                                                                          |
|                                |                   |          |                     | UU_PTB                                       | OR 0.52 (0.15, 1.57)             |                                                                                                    |
| Sperling, 1988                 | MH,               | LBW      | <2.5kg              | NR                                           |                                  | No multivariable analysis                                                                          |
| Usui, 2002                     | MH, UU            | PTB      | Born < 37 weeks     | NR                                           | OR not reported by study authors | aOR 1.5 (0.8, 2.7)                                                                                 |
|                                |                   |          |                     |                                              |                                  | Adjusted for <i>Lactobacillus</i> spp., <i>E. coli</i> , glucose non-fermenting Gram negative rods |

**Abbreviations** LBW: low birth weight, defined as birth weight <2.5kg; NAAT, nucleic acid amplification tests; NR, not reported; MH, *M. hominis*; PND, perinatal mortality; PROM, premature rupture of membrane; PTB, preterm birth; SA: spontaneous abortion; UP, *U. parvum*; UU, *U. urealyticum*;



**Supporting information**

1  
2  
3 \*\*SA defined as pregnancy loss at <20 weeks gestation or as defined by author; †PROM defined as rupture of membrane before 37 completed weeks or as  
4  
5 defined by author; ∞ Perinatal death, defined as birth after 20 weeks gestation (stillbirth) or death within 28 days after birth (neonatal death) unless otherwise  
6  
7 defined by the study authors.  
8  
9  
10  
11  
12  
13  
14  
15  
16  
17  
18  
19  
20  
21  
22  
23  
24  
25  
26  
27  
28  
29  
30  
31  
32  
33  
34  
35  
36  
37  
38  
39  
40  
41  
42  
43  
44  
45  
46

For peer review only

## Supporting information

**Table S3.2** Descriptive tables: Case control studies (n=25)

| First author,<br>publication<br>year | Organism<br>reported | Outcome | Definition<br>Provided | OR/ RR (95% CI) reported by study<br>authors |                      |                           |
|--------------------------------------|----------------------|---------|------------------------|----------------------------------------------|----------------------|---------------------------|
|                                      |                      |         |                        | Organism<br>outcome                          | Unadjusted, OR       | Adjusted, aOR             |
| Ahmadi, 2014                         | UU                   | SA      | **                     | NR                                           |                      | No multivariable analysis |
| Bosquet, 2006                        | MH                   | PTB     | Born < 37 weeks        | NR                                           |                      | No multivariable analysis |
| Cassell, 1983                        | MH                   | PTB     | Born < 37 weeks        | NR                                           |                      | No multivariable analysis |
|                                      |                      | PND     | ∞                      |                                              |                      |                           |
| Chua, 1999                           | MH                   | PTB     | Born < 37 weeks        | NR                                           |                      | No multivariable analysis |
| Daskalakis,<br>2009,                 | MH, UU               | PTB     | Born < 37 weeks        | NR                                           |                      | No multivariable analysis |
| Embree, 1980                         | MH                   | SA      | Not defined            |                                              |                      | No multivariable analysis |
|                                      |                      | PND     | Partially defined      |                                              |                      |                           |
| arhadifar, 2017                      | MH                   | SA      | **                     | MH_SA                                        | OR 0.49 (0.08, 2.73) | No multivariable analysis |
| Freitas, 2018                        | UU, UP               | PTB     | Born < 37 weeks        |                                              |                      | No multivariable analysis |

## Supporting information

| First author,<br>publication<br>year | Organism<br>reported | Outcome            | Definition<br>Provided              | OR/ RR (95% CI) reported by study<br>authors |                     |                           |
|--------------------------------------|----------------------|--------------------|-------------------------------------|----------------------------------------------|---------------------|---------------------------|
|                                      |                      |                    |                                     | Organism<br>outcome                          | Unadjusted, OR      | Adjusted, aOR             |
|                                      |                      |                    |                                     |                                              |                     | No multivariable analysis |
| Harada, 2008                         | UU                   | PTB                | Not defined                         | NR                                           |                     | No multivariable analysis |
| Hillier, 1988                        | MH                   | PTB                | Born < 37 weeks                     | NR                                           |                     | No multivariable analysis |
| Holst, 1994                          | MH                   | PTB                | Born < 37 weeks                     | NR                                           |                     | No multivariable analysis |
| Jalava, 2002                         | UU                   | PTB                | Born < 37 weeks                     | UU_PTB                                       | RR 3.34 (1.27, 8.8) | No multivariable analysis |
| Jones, 2009                          | MH, UU,<br>UP        | PTB<br>PROM        | Born < 37 weeks<br>†                | NR                                           |                     | No multivariable analysis |
| Kacerovsky,<br>2009                  | MH, UU               | PROM               | †                                   | NR                                           |                     | No multivariable analysis |
| Kafetzis, 2004                       | UU                   | PTB<br>PROM<br>PND | Born < 37 weeks<br>†<br>Not defined | NR                                           |                     | No multivariable analysis |

## Supporting information

| First author,<br>publication<br>year | Organism<br>reported | Outcome | Definition<br>Provided | OR/ RR (95% CI) reported by study<br>authors |                   |                                                                   |
|--------------------------------------|----------------------|---------|------------------------|----------------------------------------------|-------------------|-------------------------------------------------------------------|
|                                      |                      |         |                        | Organism<br>outcome                          | Unadjusted, OR    | Adjusted, aOR                                                     |
| Kumar, 2006                          | MH                   | PTB     | Born < 37 weeks        |                                              |                   | No multivariable analysis                                         |
| McDonald,<br>1992                    | MH                   | PTB     | Born < 37 weeks        | MH_PTB                                       | OR 1.7 (0.9, 3.5) | aOR 1.1 (0.5, 2.5)                                                |
|                                      |                      | PROM    | Not defined            | MH_PROM                                      | OR 1.5 (0.5, 4.3) | aOR 1.1 (0.3, 3.7)                                                |
|                                      |                      |         |                        |                                              |                   | Adjusted for 'confounding demographic and<br>obstetric variables' |
| Mitsunari,<br>2005                   | UU                   | PTB     | Not defined            | NR                                           |                   | No multivariable analysis                                         |
|                                      |                      | PROM    | Not defined            |                                              |                   |                                                                   |
| Montenegro,<br>2019                  | MH, UU               | PTB     | Born < 37 weeks        | NR                                           |                   | No multivariable analysis                                         |
|                                      |                      | PROM    | Not defined            |                                              |                   |                                                                   |
| Munday, 1984                         | MH                   | SA      | Not defined            | NR                                           |                   | No multivariable analysis                                         |

Supporting information

| First author, publication year | Organism reported | Outcome | Definition Provided | Organism outcome | Unadjusted, OR       | Adjusted, aOR             | OR/ RR (95% CI) reported by study authors |
|--------------------------------|-------------------|---------|---------------------|------------------|----------------------|---------------------------|-------------------------------------------|
| Oliveira, 2020                 | MHUU, UP          | SA      | **                  | MH_SA            | OR 0.08 (0.2, 3.17)  | No multivariable analysis |                                           |
|                                |                   |         |                     | UU_SA            | OR 2.21 (0.6, 8.22)  |                           |                                           |
|                                |                   |         |                     | UP_SA            | OR 1.74 (0.61, 4.93) |                           |                                           |
| Payne, 2014                    | UU, UP            | PTB     | Born < 37 weeks     |                  |                      | NR                        |                                           |
| Povlsen, 2001                  | UU                | PTB     | Born < 37 weeks     | UU_PTB           | OR 1.0 (0.6, 1.7)    | aOR 0.7 (0.4, 1.2)        |                                           |
|                                |                   | LBW     | <2.5kg              |                  |                      | Adjusted for LBW          |                                           |
| Toth, 1992                     | MH                | PTB     | Born < 37 weeks     |                  | NR                   | No multivariable analysis |                                           |
| Yoon, 2001                     | UU                | PTB     | Born < 37 weeks     |                  | NR                   | No multivariable analysis |                                           |
|                                |                   | PROM    | Not defined         |                  |                      |                           |                                           |

**Abbreviations** LBW: low birth weight defined as birth weight <2.5kg; NAAT, nucleic acid amplification tests; NR, not reported; MH, *M. hominis*; PND, perinatal mortality; PROM, premature rupture of membrane; PTB, preterm birth; SA: spontaneous abortion; UP, *U. parvum*; UU, *U. urealyticum*

## Supporting information

\*\*SA defined as pregnancy loss at <20 weeks gestation or as defined by author; †PROM defined as rupture of membrane before 37 completed weeks or as defined by author.

**Table S3.3** Descriptive tables: Cross sectional studies (n=6)

| First author,<br>publication<br>year | Organism<br>reported | Total<br>enrolled | Definition          |                                | OR/ RR (95% CI) reported by study authors |                                                                                                                                                                                               |
|--------------------------------------|----------------------|-------------------|---------------------|--------------------------------|-------------------------------------------|-----------------------------------------------------------------------------------------------------------------------------------------------------------------------------------------------|
|                                      |                      |                   | Outcome             | Provided                       | Organism<br>outcome                       | Unadjusted, OR                                                                                                                                                                                |
| <b>Abele-Horn,<br/>2000</b>          | UU                   | 295               | PTB<br>PROM         | Born < 37 weeks<br>†           | NR                                        | Multivariable analysis reported in text: UU<br>>10 <sup>5</sup> cfu/ml associated with PTB, adjusted for<br>PROM, prolonged rupture of membranes,<br>chorioamnionitis, obstetric risk factors |
| <b>Grattard,<br/>1995</b>            | MH                   | 208               | PTB,<br>PROM<br>LBW | Born < 37 weeks<br>†<br><2.5kg | NR                                        | No multivariable analysis                                                                                                                                                                     |
| <b>Kundsinn,<br/>1984</b>            | MH                   | 801               | PND                 | ∞                              | NR                                        | No multivariable analysis                                                                                                                                                                     |

Supporting information

| First author, publication year | Organism reported | Total enrolled | Outcome | Definition Provided | OR/ RR (95% CI) reported by study authors |                           |               |
|--------------------------------|-------------------|----------------|---------|---------------------|-------------------------------------------|---------------------------|---------------|
|                                |                   |                |         |                     | Organism                                  | Unadjusted, OR            | Adjusted, aOR |
|                                |                   |                |         |                     | outcome                                   |                           |               |
| McCormack, 1975                | MH                | 327            | LBW     | <2.5kg              | NR                                        | No multivariable analysis |               |
|                                |                   |                | PND     | Not defined         |                                           |                           |               |
| Nasution, 2007                 | MH, UU            | 120            | PROM    | Not defined         | NR                                        | No multivariable analysis |               |
| Sweeney, 2016                  | UU, UP            | 535            | PTB     | Born < 37 weeks     | NR                                        | No multivariable analysis |               |

**Abbreviations** LBW: low birth weight defined as birth weight <2.5kg; NAAT, nucleic acid amplification tests; NR, not reported; MH, *M. hominis*; PND, perinatal mortality; PROM, premature rupture of membrane; PTB, preterm birth; SA: spontaneous abortion; UP, *U. parvum*; UU, *U. urealyticum*

†PROM defined as rupture of membrane before 37 completed weeks or as defined by author; ∞ Perinatal death, defined as birth after 20 weeks gestation (stillbirth) or death within 28 days after birth (neonatal death) unless otherwise defined by the study authors.

## Supporting information

**Table S4.1** Summary description of studies reporting *M. hominis* (n=42), by income status

| First author,<br>Pub year,<br>country | Gestational age<br>assessment | Sample size for outcome of interest;<br>Number of adverse outcomes in women with <i>M. hominis</i> / total number of women<br>with adverse outcome (%) |            |      |           |           | NICE checklist<br>criteria fulfilled* |
|---------------------------------------|-------------------------------|--------------------------------------------------------------------------------------------------------------------------------------------------------|------------|------|-----------|-----------|---------------------------------------|
|                                       |                               | PTB                                                                                                                                                    | LBW        | PROM | SA        | PND       |                                       |
|                                       |                               | <b>High-income country<sup>‡</sup></b>                                                                                                                 |            |      |           |           |                                       |
| Agger, 2014, USA                      | NR                            | 676                                                                                                                                                    |            |      |           |           | +/+                                   |
|                                       |                               | 14/54 (26)                                                                                                                                             |            |      |           |           |                                       |
| Braun, 1971, USA                      | LMP                           |                                                                                                                                                        | 485        |      | 491       | 491       | +/-                                   |
|                                       |                               |                                                                                                                                                        | 24/42 (57) |      | 3/6 (50)  | 7/10 (70) |                                       |
| Cassell, 1983, USA                    | US                            | 61                                                                                                                                                     |            |      |           | 61        | +/-                                   |
|                                       |                               | 1/10 (10)                                                                                                                                              |            |      |           | 0/3 (0)   |                                       |
| Donders, 2009, Belgium                | US                            | 744                                                                                                                                                    |            |      | 759       |           | +/+                                   |
|                                       |                               | 5/50 (10)                                                                                                                                              |            |      | 1/15 (7)  |           |                                       |
| Embree, 1980, Canada                  | LMP, NN<br>assessment         |                                                                                                                                                        |            |      | 157       | 157       | -/-                                   |
|                                       |                               |                                                                                                                                                        |            |      | 3/10 (30) | 0/39 (0)  |                                       |



## Supporting information

| First author,<br>Pub year,<br>country | Gestational age<br>assessment | Sample size for outcome of interest;<br>Number of adverse outcomes in women with <i>M. hominis</i> / total number of women<br>with adverse outcome (%) |                 |                  |                  |     | NICE checklist<br>criteria fulfilled* |
|---------------------------------------|-------------------------------|--------------------------------------------------------------------------------------------------------------------------------------------------------|-----------------|------------------|------------------|-----|---------------------------------------|
|                                       |                               | PTB                                                                                                                                                    | LBW             | PROM             | SA               | PND |                                       |
| Grattard, 1995, France                | NR                            | 193<br>3/8 (38)                                                                                                                                        | 202<br>2/8 (25) | 208<br>4/36 (11) |                  |     | -/+                                   |
| Harrison, 1983, USA                   | NR                            |                                                                                                                                                        |                 |                  | 348<br>4/22 (18) |     | -/-                                   |
| Hillier, 1988, USA                    | US, FH, LMP                   | 112<br>3/38 (8)                                                                                                                                        |                 |                  |                  |     | +/+                                   |
| Hillier, 1995, USA                    | LMP                           | 9105<br>161/423 (38)                                                                                                                                   |                 |                  |                  |     |                                       |
| Holst, 1994, Sweden                   | US, LMP                       | 87<br>10/22 (45)                                                                                                                                       |                 |                  |                  |     | ++/+                                  |
| Jones, 2009,<br>United Kingdom        | NR                            | 74<br>2/53 (4)                                                                                                                                         |                 | 74<br>2/26 (8)   |                  |     | -/-                                   |

## Supporting information

| First author,<br>Pub year,<br>country | Gestational age<br>assessment | Sample size for outcome of interest;<br>Number of adverse outcomes in women with <i>M. hominis</i> / total number of women<br>with adverse outcome (%) |          |           |          |           | NICE checklist<br>criteria fulfilled* |
|---------------------------------------|-------------------------------|--------------------------------------------------------------------------------------------------------------------------------------------------------|----------|-----------|----------|-----------|---------------------------------------|
|                                       |                               | PTB                                                                                                                                                    | LBW      | PROM      | SA       | PND       |                                       |
| Kataoka, 2006, Japan                  | US, LMP                       | 872                                                                                                                                                    |          | 872       | 877      | 872       | +/+                                   |
|                                       |                               | 4/16 (25)                                                                                                                                              |          | 1/7 (14)  | 0/5 (0)  | 0/1 (0)   |                                       |
| Kundsinn, 1984, USA                   | NR                            |                                                                                                                                                        |          |           |          | 801       | -/+                                   |
|                                       |                               |                                                                                                                                                        |          |           |          | 5/29 (17) |                                       |
| Kwak, 2014, South Korea               | NR                            | 112                                                                                                                                                    |          |           |          |           | +/+                                   |
|                                       |                               | 13/86 (15)                                                                                                                                             |          |           |          |           |                                       |
| Lee, 2016,<br>South Korea             | NR                            | 466                                                                                                                                                    |          | 466       | 466      |           | -/-                                   |
|                                       |                               | 1/141 (<1)                                                                                                                                             |          | 0/187 (0) | 0/11 (0) |           |                                       |
| McCormack, 1975, USA                  | NR                            |                                                                                                                                                        | 326      |           |          | 326       | +/-                                   |
|                                       |                               |                                                                                                                                                        | 3/42 (7) |           |          | 2/6 (33)  |                                       |
| McDonald, 1992,<br>Australia          | LMP, US                       | 786                                                                                                                                                    |          | 708       |          |           | -/-                                   |
|                                       |                               | 11/135 (8)                                                                                                                                             |          | 4/57 (8)  |          |           |                                       |

## Supporting information

| First author,<br>Pub year,<br>country | Gestational age<br>assessment | Sample size for outcome of interest;<br>Number of adverse outcomes in women with <i>M. hominis</i> / total number of women<br>with adverse outcome (%) |     |                   |                  |                 | NICE checklist<br>criteria fulfilled* |
|---------------------------------------|-------------------------------|--------------------------------------------------------------------------------------------------------------------------------------------------------|-----|-------------------|------------------|-----------------|---------------------------------------|
|                                       |                               | PTB                                                                                                                                                    | LBW | PROM              | SA               | PND             |                                       |
| McDonald, 1994,<br>Australia          | US, LMP                       | 337<br>7/45 (16)                                                                                                                                       |     |                   |                  |                 | -/-                                   |
| Menard, 2010,<br>France               | US, LMP                       | 90<br>6/36 (17)                                                                                                                                        |     |                   |                  |                 | -/-                                   |
| Minkoff, 1984, USA                    | NR                            | 201<br>10/18 (56)                                                                                                                                      |     | 188<br>21/40 (53) |                  |                 | -/-                                   |
| Munday, 1984, United<br>Kingdom       | NR                            |                                                                                                                                                        |     |                   | 241<br>9/76 (12) |                 | +/-                                   |
| Nguyen, 2004, Switzerland             | NR                            | 395<br>3/10 (30)                                                                                                                                       |     | 365<br>0/7 (0%)   |                  | 395<br>1/6 (17) | +/+                                   |
| Payne, 2016, Australia                | NR                            | 187<br>2/13 (15)                                                                                                                                       |     |                   |                  |                 | +/+                                   |

## Supporting information

| First author,<br>Pub year,<br>country  | Gestational age<br>assessment | Sample size for outcome of interest;<br>Number of adverse outcomes in women with <i>M. hominis</i> / total number of women<br>with adverse outcome (%) |            |      |    |     | NICE checklist<br>criteria fulfilled* |
|----------------------------------------|-------------------------------|--------------------------------------------------------------------------------------------------------------------------------------------------------|------------|------|----|-----|---------------------------------------|
|                                        |                               | PTB                                                                                                                                                    | LBW        | PROM | SA | PND |                                       |
| Payne, 2020, Australia                 | NR                            | 1000                                                                                                                                                   |            |      |    |     | +/+                                   |
|                                        |                               | 9/118 (8)                                                                                                                                              |            |      |    |     |                                       |
| Sperling, 1988, USA                    | NR                            |                                                                                                                                                        | 404        |      |    |     | -/-                                   |
|                                        |                               |                                                                                                                                                        | 14/37 (38) |      |    |     |                                       |
| Toth, 1992, United<br>Kingdom          | NR                            | 80                                                                                                                                                     |            |      |    |     | -/-                                   |
|                                        |                               | 3/39 (8)                                                                                                                                               |            |      |    |     |                                       |
| Usui, 2002, Japan                      | LMP                           | 1958                                                                                                                                                   |            |      |    |     | +/-                                   |
|                                        |                               | 15/342 (4)                                                                                                                                             |            |      |    |     |                                       |
| <b>Upper-middle income<sup>‡</sup></b> |                               |                                                                                                                                                        |            |      |    |     |                                       |
| Berman, 1987, Mexico                   | NR                            |                                                                                                                                                        | 796        |      |    |     | -/+                                   |
|                                        |                               |                                                                                                                                                        | 28/48 (58) |      |    |     |                                       |

## Supporting information

| First author,<br>Pub year,<br>country | Gestational age<br>assessment | Sample size for outcome of interest;<br>Number of adverse outcomes in women with <i>M. hominis</i> / total number of women<br>with adverse outcome (%) |                  |                |                  |                  | NICE checklist<br>criteria fulfilled* |
|---------------------------------------|-------------------------------|--------------------------------------------------------------------------------------------------------------------------------------------------------|------------------|----------------|------------------|------------------|---------------------------------------|
|                                       |                               | PTB                                                                                                                                                    | LBW              | PROM           | SA               | PND              |                                       |
| Chua, 1999, Malaysia                  | LMP, NN<br>assessment         | 120<br>9/60 (15)                                                                                                                                       |                  |                |                  |                  | +/+                                   |
| Farhadifar, 2016, Iran                | US/LMP                        |                                                                                                                                                        |                  |                | 218<br>2/109 (2) |                  | +/+                                   |
| Govender, 2009, South<br>Africa       | NR                            | 199<br>11/20 (55)                                                                                                                                      |                  |                |                  |                  | -/-                                   |
| Luton, 1994, Gabon                    | US, LMP                       | 181<br>11/20 (55)                                                                                                                                      | 181<br>8/13 (62) |                |                  | 198<br>5/10 (50) | -/-                                   |
| Montenegro, 2019,<br>Colombia         | NR                            | 211<br>1/84 (1)                                                                                                                                        |                  | 211<br>0/3 (0) |                  |                  | +/+                                   |
| Odendaal,<br>2002, South Africa       | US                            | 395<br>33/119 (28)                                                                                                                                     |                  |                | 395<br>1/7 (14)  | 395<br>2/4 (50)  | +/-                                   |

## Supporting information

| First author,<br>Pub year,<br>country  | Gestational age<br>assessment | Sample size for outcome of interest;<br>Number of adverse outcomes in women with <i>M. hominis</i> / total number of women<br>with adverse outcome (%) |     |      |            |     | NICE checklist<br>criteria fulfilled* |
|----------------------------------------|-------------------------------|--------------------------------------------------------------------------------------------------------------------------------------------------------|-----|------|------------|-----|---------------------------------------|
|                                        |                               | PTB                                                                                                                                                    | LBW | PROM | SA         | PND |                                       |
| Oliveria, 2020, Brazil                 | NR                            |                                                                                                                                                        |     |      | 109        |     | +/+                                   |
|                                        |                               |                                                                                                                                                        |     |      | 11/89 (12) |     |                                       |
| <b><u>Lower-middle/low income‡</u></b> |                               |                                                                                                                                                        |     |      |            |     |                                       |
| Schwab,2015, Indonesia                 | LMP                           | 62                                                                                                                                                     |     |      |            |     | -/-                                   |
|                                        |                               | 2/23 (9)                                                                                                                                               |     |      |            |     |                                       |
| Kumar, 2006, India                     | NR                            | 120                                                                                                                                                    |     |      |            |     | +/+                                   |
|                                        |                               | 4/60 (7)                                                                                                                                               |     |      |            |     |                                       |
| <b><u>Country not reported</u></b>     |                               |                                                                                                                                                        |     |      |            |     |                                       |
| González Bosquet, 2006                 | US                            | 120                                                                                                                                                    |     |      |            |     | +/+                                   |
|                                        |                               | 0/70 (0)                                                                                                                                               |     |      |            |     |                                       |
| Daskalakis, 2009                       | US, LMP                       | 37                                                                                                                                                     |     |      |            |     | +/+                                   |
|                                        |                               | 8/25 (32)                                                                                                                                              |     |      |            |     |                                       |

Supporting information

| First author,<br>Pub year,<br>country | Gestational age<br>assessment | Sample size for outcome of interest;<br>Number of adverse outcomes in women with <i>M. hominis</i> / total number of women<br>with adverse outcome (%) |     |                    |    |     | NICE checklist<br>criteria fulfilled* |
|---------------------------------------|-------------------------------|--------------------------------------------------------------------------------------------------------------------------------------------------------|-----|--------------------|----|-----|---------------------------------------|
|                                       |                               | PTB                                                                                                                                                    | LBW | PROM               | SA | PND |                                       |
| Kacerovsky, 2009                      | NR                            |                                                                                                                                                        |     | 450<br>63/225 (28) |    |     | -/-                                   |
| Nasution, 2007                        | NR                            |                                                                                                                                                        |     | 80<br>4/40 (10)    |    |     | -/-                                   |
| Perni, 2004                           | NR                            | 179<br>0/10 (0)                                                                                                                                        |     | 179<br>2/5 (40)    |    |     | +/+                                   |

Abbreviations: MH, *Mycoplasma hominis*; UU, *Ureaplasma urealyticum*; UP, *Ureaplasma parvum*; NR, not reported.

LBW: low birth weight, defined as birth weight <2.5kg ; PTB: preterm birth, defined as delivery before 37weeks gestation; PROM: premature rupture of membranes, - defined as clinically confirmed rupture of membrane before 37weeks gestation; PND, perinatal mortality, defined as stillbirth (death after 20/40 gestation) or neonatal death (death <28 day since birth), unless otherwise defined by the study authors; SA: spontaneous abortion- defined as pregnancy loss at <20/40 or as defined by author.

## Supporting information

\* UK National Institute of Health and Care Excellence (NICE) checklist, summary of criteria for internal/external validity: +/+ Some checklist criteria fulfilled; -/-Few or no checklist criteria fulfilled

‡ high-income (\$12,376 or more); upper-middle income (\$3,996 to \$1,2375); lower-middle-income (\$1,025 to \$3,995); low-income (\$1,025 or less) [Source:

World Bank, Gross national income per capita, 2019-2020 <https://datatopics.worldbank.org/world-development-indicators/the-world-by-income-and-region.html>]

For peer review only



Supporting information

Table S4.2 Summary description of studies reporting U. urealyticum (n=31), by income status

| First author, pub. year, country | Gestational age assessment | Sample size for outcome of interest; Number of adverse outcomes in women with U. urealyticum/ total number of women with adverse outcome (%) |     |            |    |     | NICE checklist criteria fulfilled |
|----------------------------------|----------------------------|----------------------------------------------------------------------------------------------------------------------------------------------|-----|------------|----|-----|-----------------------------------|
|                                  |                            | PTB                                                                                                                                          | LBW | PROM       | SA | PND |                                   |
|                                  |                            | <b>High-income country<sup>‡</sup></b>                                                                                                       |     |            |    |     |                                   |
| Abele-Horn, 2000, Germany        | US, LMP                    | 295                                                                                                                                          |     | 295        |    |     | -/++                              |
|                                  |                            | 57/ 73 (78)                                                                                                                                  |     | 58/76 (76) |    |     |                                   |
| Agger, 2014, USA                 | NR                         | 676                                                                                                                                          |     |            |    |     | +/+                               |
|                                  |                            | 4/54 (11)                                                                                                                                    |     |            |    |     |                                   |
| Freitas, 2018, Canada            | NR                         | 216                                                                                                                                          |     |            |    |     | +/+                               |
|                                  |                            | 0/46 (0)                                                                                                                                     |     |            |    |     |                                   |
| Harada, 2008, Japan              | NR                         | 145                                                                                                                                          |     |            |    |     | +/+                               |
|                                  |                            | 23/45 (51)                                                                                                                                   |     |            |    |     |                                   |

## Supporting information

| First author, pub. year,<br>country | Gestational<br>age assessment | Sample size for outcome of interest;<br>Number of adverse outcomes in women with <i>U. urealyticum</i> / total number of<br>women with adverse outcome (%) |     |                     |                   |                  | NICE checklist<br>criteria fulfilled |
|-------------------------------------|-------------------------------|------------------------------------------------------------------------------------------------------------------------------------------------------------|-----|---------------------|-------------------|------------------|--------------------------------------|
|                                     |                               | PTB                                                                                                                                                        | LBW | PROM                | SA                | PND              |                                      |
| Jones, 2009, UK                     | NR                            | 74<br>2/53 (4)                                                                                                                                             |     | 74<br>2/26 (8)      |                   |                  | -/-                                  |
| Kafetzis, 2004, Greece              | NR                            | 251<br>46/126 (37)                                                                                                                                         |     | 250<br>9/20 (45)    |                   | 171<br>6/16 (38) | +/+                                  |
| Kataoka, 2006, Japan                | US, LMP                       | 872<br>0/16 (0)                                                                                                                                            |     | 8772<br>0/7 (0)     | 877<br>1/5 (20)   | 872<br>0/1 (0)   | +/+                                  |
| Koucky, 2016, Czech<br>Republic     | US, LMP                       | 63<br>17/29 (59)                                                                                                                                           |     |                     |                   |                  | +/+                                  |
| Kwak, 2014, South Korea             | NR                            | 179<br>84/129 (65)                                                                                                                                         |     |                     |                   |                  | +/+                                  |
| Lee, 2016, South Korea              | NR                            | 936<br>72/141 (51)                                                                                                                                         |     | 936<br>100/187 (53) | 936<br>12/23 (52) |                  | -/-                                  |

## Supporting information

| First author, pub. year,<br>country | Gestational<br>age assessment | Sample size for outcome of interest;<br>Number of adverse outcomes in women with <i>U. urealyticum</i> / total number of<br>women with adverse outcome (%) |                   |                  |    |     | NICE checklist<br>criteria fulfilled |
|-------------------------------------|-------------------------------|------------------------------------------------------------------------------------------------------------------------------------------------------------|-------------------|------------------|----|-----|--------------------------------------|
|                                     |                               | PTB                                                                                                                                                        | LBW               | PROM             | SA | PND |                                      |
| Mitsunari, 2005, Japan              | NR                            | 82<br>17/21 (81)                                                                                                                                           |                   | 82<br>10/11 (91) |    |     | +/+                                  |
| Payne, 2014, China &<br>Australia   | US                            | 972<br>2/13 (15)                                                                                                                                           |                   |                  |    |     | +/+                                  |
| Payne, 2016, Australia              | NR                            | 187<br>0/115 (0)                                                                                                                                           |                   |                  |    |     | +/+                                  |
| Payne, 2020, Australia              | NR                            | 1000<br>14/118 (12)                                                                                                                                        |                   |                  |    |     | +/+                                  |
| Povlsen, 2001, Denmark              | NR                            | 484<br>49/84 (58)                                                                                                                                          | 484<br>36/48 (75) |                  |    |     | +/+                                  |
| Peretz, 2020, Israel                | NR                            | 214<br>3/5 (60)                                                                                                                                            | 214<br>1/3 (33)   |                  |    |     | -/-                                  |

## Supporting information

| First author, pub. year,<br>country    | Gestational<br>age assessment | Sample size for outcome of interest;<br>Number of adverse outcomes in women with <i>U. urealyticum</i> / total number of<br>women with adverse outcome (%) |     |                            |                    |     | NICE checklist<br>criteria fulfilled |
|----------------------------------------|-------------------------------|------------------------------------------------------------------------------------------------------------------------------------------------------------|-----|----------------------------|--------------------|-----|--------------------------------------|
|                                        |                               | PTB                                                                                                                                                        | LBW | PROM                       | SA                 | PND |                                      |
| Rittenschober-Böhm, 2018,<br>Austria   | US                            | 2183<br>19/146 (13)                                                                                                                                        |     |                            |                    |     | +/+                                  |
| Sweeney, 2016, USA                     | NR                            | 535<br>6/443 (1)                                                                                                                                           |     |                            |                    |     | +/-                                  |
| Usui, 2002, Japan                      | NR                            | 1958<br>189/342 (55)                                                                                                                                       |     |                            |                    |     | +/-                                  |
| Yoon, 2001,<br>South Korea             | NR                            | 114<br>3/19 (16)                                                                                                                                           |     | Missing data<br>2/9 (22)** |                    |     | +/+                                  |
| <b>Upper-middle income<sup>‡</sup></b> |                               |                                                                                                                                                            |     |                            |                    |     |                                      |
| Ahmadi, 2014, Iran                     | US, LMP                       |                                                                                                                                                            |     |                            | 218<br>18/109 (17) |     | +/+                                  |

Supporting information

| First author, pub. year, country       | Gestational age assessment | Sample size for outcome of interest; Number of adverse outcomes in women with <i>U. urealyticum</i> / total number of women with adverse outcome (%) |     |         |            |     | NICE checklist criteria fulfilled |
|----------------------------------------|----------------------------|------------------------------------------------------------------------------------------------------------------------------------------------------|-----|---------|------------|-----|-----------------------------------|
|                                        |                            | PTB                                                                                                                                                  | LBW | PROM    | SA         | PND |                                   |
| Govender, 2009, South Africa           | NR                         | 199                                                                                                                                                  |     |         |            |     | -/-                               |
|                                        |                            | 5/20 (25)                                                                                                                                            |     |         |            |     |                                   |
| Oliveira, 2020, Brazil                 | NR                         |                                                                                                                                                      |     |         | 109        |     | +/+                               |
|                                        |                            |                                                                                                                                                      |     |         | 25/89 (28) |     |                                   |
| Montenegro, 2019, Colombia             | NR                         | 211                                                                                                                                                  |     | 211     |            |     | +/+                               |
|                                        |                            | 0/84 (0)                                                                                                                                             |     | 0/3 (0) |            |     |                                   |
| <b>Lower-middle income<sup>‡</sup></b> |                            |                                                                                                                                                      |     |         |            |     |                                   |
| Schwab, 2015, Indonesia                | LMP                        | 62                                                                                                                                                   |     |         |            |     | -/-                               |
|                                        |                            | 2/23 (9)                                                                                                                                             |     |         |            |     |                                   |
| <b>Country not reported</b>            |                            |                                                                                                                                                      |     |         |            |     |                                   |
| Daskalakis, 2009                       | US, LMP                    | 37                                                                                                                                                   |     |         |            |     | +/+                               |
|                                        |                            | 17/25 (68)                                                                                                                                           |     |         |            |     |                                   |

## Supporting information

| First author, pub. year,<br>country | Gestational<br>age assessment | Sample size for outcome of interest;<br>Number of adverse outcomes in women with <i>U. urealyticum</i> / total number of<br>women with adverse outcome (%) |          |              |          |     | NICE checklist<br>criteria fulfilled |
|-------------------------------------|-------------------------------|------------------------------------------------------------------------------------------------------------------------------------------------------------|----------|--------------|----------|-----|--------------------------------------|
|                                     |                               | PTB                                                                                                                                                        | LBW      | PROM         | SA       | PND |                                      |
| Gerber, 2003,                       | NR                            | 254                                                                                                                                                        |          | 254          |          |     | +/-                                  |
|                                     |                               | 9/10 (90)                                                                                                                                                  |          | 6/7 (86)     |          |     |                                      |
| Jalava, 2002                        | NR                            | 122                                                                                                                                                        |          |              |          |     | +/+                                  |
|                                     |                               | 12/17 (71)                                                                                                                                                 |          |              |          |     |                                      |
| Kacerovsky, 2009                    | NR                            |                                                                                                                                                            |          | 450          |          |     | -/-                                  |
|                                     |                               |                                                                                                                                                            |          | 152/225 (68) |          |     |                                      |
| Nasution, 2007                      | NR                            |                                                                                                                                                            |          | 80           |          |     | -/-                                  |
|                                     |                               |                                                                                                                                                            |          | 9/40 (23)    |          |     |                                      |
| Perni, 2004                         | Cohort                        | NR                                                                                                                                                         | 172      |              | 172      |     | +/+                                  |
|                                     |                               |                                                                                                                                                            | 0/10 (0) |              | 3/5 (60) |     |                                      |

**Abbreviations:** MH, *Mycoplasma hominis*; UU, *Ureaplasma urealyticum*; UP, *Ureaplasma parvum*; NR, not reported.

## Supporting information

LBW: low birth weight, defined as birth weight <2.5kg ; PTB: preterm birth, defined as delivery before 37weeks gestation; PROM: premature rupture of membranes, - defined as clinically confirmed rupture of membrane before 37weeks gestation; PND, perinatal mortality, defined as stillbirth (death after 20/40 gestation) or neonatal death (death <28 day since birth), unless otherwise defined by the study authors; SA: spontaneous abortion- defined as pregnancy loss at <20/40 or as defined by author.

\* UK National Institute of Health and Care Excellence (NICE) checklist, summary of criteria for internal/external validity: +/+ Some checklist criteria fulfilled; -/- Few or no checklist criteria fulfilled

‡high-income (\$12,376 or more); upper-middle income (\$3,996 to \$12,375); lower-middle-income (\$1,025 to \$3,995); low-income (\$1,025 or less) [Source: World Bank, Gross national income per capita, 2019-2020 <https://datatopics.worldbank.org/world-development-indicators/the-world-by-income-and-region.html>]

## Supporting information

**Table S4.3** Summary description of studies reporting *U. parvum* (n=12), by income status

| First author,<br>Pub. year, country                     | Study<br>design | Gestational age<br>assessment | Sample size for outcome of interest.                                                                          |     |            |          |           | NICE checklist<br>criteria fulfilled |
|---------------------------------------------------------|-----------------|-------------------------------|---------------------------------------------------------------------------------------------------------------|-----|------------|----------|-----------|--------------------------------------|
|                                                         |                 |                               | Number of adverse outcomes in women with <i>U. parvum</i> / total<br>number of women with adverse outcome (%) |     |            |          |           |                                      |
|                                                         |                 |                               | PTB                                                                                                           | LBW | PROM       | SA       | PND       |                                      |
| <b>Upper-middle and high-income country<sup>‡</sup></b> |                 |                               |                                                                                                               |     |            |          |           |                                      |
| <b>Agger, 2014, USA</b>                                 | Cohort          | NR                            | 676                                                                                                           |     |            |          |           | ++                                   |
|                                                         |                 |                               | 29/54 (54)                                                                                                    |     |            |          |           |                                      |
| <b>Freitas, 2018, Canada</b>                            | Case-control    | NR                            | 216                                                                                                           |     |            |          |           | ++                                   |
|                                                         |                 |                               | 14/46 (30)                                                                                                    |     |            |          |           |                                      |
| <b>Govender, 2009,<br/>South Africa</b>                 | Cohort          | NR                            | 199                                                                                                           |     |            |          |           | -/-                                  |
|                                                         |                 |                               | 10/20 (50)                                                                                                    |     |            |          |           |                                      |
| <b>Jones, 2009, United<br/>Kingdom</b>                  | Case-control    | NR                            | 74                                                                                                            |     | 74         |          |           | -/-                                  |
|                                                         |                 |                               | 19/53 (36)                                                                                                    |     | 11/26 (42) |          |           |                                      |
| <b>Kataoka, 2006, Japan</b>                             | Cohort          | US, LMP                       | 872                                                                                                           |     | 872        | 877      | 872       | ++                                   |
|                                                         |                 |                               | 4/16 (25)                                                                                                     |     | 6/7 (86)   | 3/5 (60) | 1/1 (100) |                                      |



## Supporting information

|                                           |                 |    |      |     |     |                   |     |
|-------------------------------------------|-----------------|----|------|-----|-----|-------------------|-----|
| <b>Oliveira, 2020, Brazil</b>             | Case-control    | NR |      |     | 109 | 68/89 (76)        | ++  |
| <b>Payne, 2014, China &amp; Australia</b> | Case-control    | NR | 972  |     |     | 2/115 (2)         | ++  |
| <b>Payne, 2016, Australia</b>             | Cohort          | NR | 187  |     |     | 10/13 (77)        | ++  |
| <b>Payne, 2020, Australia</b>             | Cohort          | NR | 1000 |     |     | 56/118 (48)       | ++  |
| <b>Peretz, 2020, Israel</b>               | Cohort          | NR | 214  | 214 |     | 1/5 (20) 1/3 (33) | -/- |
| <b>Rittenschober-Böhm, 2018, Austria</b>  | Cohort          | US | 3316 |     |     | 140/267 (52)      | ++  |
| <b>Sweeney, 2016, USA</b>                 | Cross-sectional | NR | 535  |     |     | 27/443 (4)        | +/- |

**Abbreviations:** MH, *Mycoplasma hominis*; UU, *Ureaplasma urealyticum*; UP, *Ureaplasma parvum*; NR, not reported.

## Supporting information

LBW: low birth weight, defined as birth weight <2.5kg ; PTB: preterm birth, defined as delivery before 37weeks gestation; PROM: premature rupture of membranes, - defined as clinically confirmed rupture of membrane before 37weeks gestation; PND, perinatal mortality, defined as stillbirth (death after 20/40 gestation) or neonatal death (death <28 day since birth), unless otherwise defined by the study authors; SA: spontaneous abortion- defined as pregnancy loss at <20/40 or as defined by author.

\* UK National Institute of Health and Care Excellence (NICE) checklist, summary of criteria for internal/external validity: ++ Some checklist criteria fulfilled; - /-Few or no checklist criteria fulfilled

‡ high-income (\$12,376 or more); upper-middle income (\$3,996 to \$1,2375) [Source: World Bank, Gross national income per capita, 2019-2020

<https://datatopics.worldbank.org/world-development-indicators/the-world-by-income-and-region.html>]

## Supporting information

**Table S5.1** Study setting and socio-demographics, cohort studies (n=26)

| <b>First author,<br/>year of<br/>publication</b> | <b>Location of<br/>study</b> | <b>Study setting</b> | <b>Urban/ rural<br/>location</b> | <b>Mean<sup>†</sup>/<br/>median age<br/>years (range)</b> | <b>Ethnicity</b> | <b>Other infections<br/>included/<br/>(excluded)</b> | <b>Smokers<br/>included (%)</b> | <b>Multiple<br/>pregnancies</b> |
|--------------------------------------------------|------------------------------|----------------------|----------------------------------|-----------------------------------------------------------|------------------|------------------------------------------------------|---------------------------------|---------------------------------|
| <b>Agger, 2014</b>                               | USA                          | NR/unclear;          | Mixed                            | NR                                                        | Mixed            | CT, NG, HPV, herpes,<br>syphilis‡                    | NR                              | Yes                             |
| <b>Berman, 1987</b>                              | Mexico                       | Health facility      | NR/unclear                       | NR                                                        | NR               | CT                                                   | NR                              | No                              |
| <b>Braun, 1971</b>                               | USA                          | Health facility      | Urban                            | NR                                                        | Mixed            | NR                                                   | NR                              | NR                              |
| <b>Donders, 2009</b>                             | Belgium                      | Health facility      | Urban                            | 29 <sup>†</sup>                                           | Mixed            | BV;<br>(CT, TV, NG, syphilis)                        | 120/761<br>(15.8%)              | No                              |
| <b>Gerber, 2003</b>                              | NR                           | Health facility      | NR/unclear                       | 19-42                                                     | White            | NR                                                   | NR                              | Yes                             |
| <b>Govender, 2009</b>                            | South Africa                 | Health facility      | Urban                            | NA                                                        | NR               | HIV, CT‡                                             | NR                              | NR                              |
| <b>Harrison, 1983</b>                            | USA                          | Health facility      | Urban                            | NR                                                        | Mixed            | CT                                                   | NR                              | Yes                             |
| <b>Hillier, 1995</b>                             | USA                          | Health facility      | Urban                            | NR                                                        | Mixed            | BV, NG, CT, TV                                       | Yes but<br>#/%NR                | No                              |
| <b>Kataoka, 2006</b>                             | Japan                        | Health facility      | Urban                            | 28.9 <sup>†</sup>                                         | NR               | CT, NG‡                                              | NR                              | No                              |

## Supporting information

| First author,<br>year of<br>publication | Location of<br>study | Study setting   | Urban/ rural<br>location | Mean <sup>†</sup> /<br>median age<br>years (range) | Ethnicity | Other infections<br>included/<br>(excluded) | Smokers<br>included (%) | Multiple<br>pregnancies |
|-----------------------------------------|----------------------|-----------------|--------------------------|----------------------------------------------------|-----------|---------------------------------------------|-------------------------|-------------------------|
| <b>Koucky, 2016</b>                     | Czech<br>Republic    | Health facility | Urban                    | 31                                                 | NR        | NR                                          | NR                      | No                      |
| <b>Kwak, 2014</b>                       | South Korea          | Health facility | Urban                    | 30.7                                               | NR        | NR                                          | NR                      | No                      |
| <b>Lee, 2016</b>                        | South Korea          | Health facility | Urban                    | 31 (15-47)                                         | NR        | NR                                          | NR                      | NR                      |
| <b>Luton, 1994</b>                      | Gabon                | Health facility | NR/unclear               | NR                                                 | NR        | HIV, CT, TV,<br>NG, Syphilis                | NR                      | No                      |
| <b>Minkoff, 1984</b>                    | USA                  | Health facility | NR                       | 27 <sup>†</sup> (17-39)                            | Mixed     | CT, TV                                      | NR                      | Yes                     |
| <b>McDonald,<br/>1994</b>               | Australia            | Health facility | NR                       | NR                                                 | NR        | NR                                          | NR                      | NR                      |
| <b>Menard, 2010</b>                     | France               | Health facility | Urban                    | NR                                                 | NR        | BV                                          | NR                      | No                      |
| <b>Nguyen, 2004</b>                     | Switzerland          | Health facility | Urban                    | 19-42                                              | NR        | NR                                          | NR                      | No                      |
| <b>Odendaal, 2002</b>                   | South Africa         | Health facility | Urban                    | NR                                                 | NR        | CT, BV, NG                                  | 161/395<br>(40.8%)      | No                      |

Supporting information

| First author,<br>year of<br>publication | Location of<br>study | Study setting   | Urban/<br>rural<br>location | Mean <sup>†</sup> /<br>median age<br>years (range) | Ethnicity | Other infections<br>included/<br>(excluded) | Smokers<br>included (%) | Multiple<br>pregnancies |
|-----------------------------------------|----------------------|-----------------|-----------------------------|----------------------------------------------------|-----------|---------------------------------------------|-------------------------|-------------------------|
| Payne, 2016                             | Australia            | Health facility | Urban                       | 30 (18-43)                                         | Mixed     | NR                                          | 21/191 (11%)            | No                      |
| Payne, 2020                             | Australia            | Health facility | Urban                       | NR                                                 | Mixed     | (HIV) ‡                                     | 135/ 1000<br>(13.5%)    | No                      |
| Peretz, 2020                            | Israel               | Health facility | Urban                       | 29.8 <sup>†</sup>                                  | Mixed     | NR ‡                                        | NR                      | Yes                     |
| Perni, 2004                             | NR                   | Health facility | NR/unclear                  | 18-44                                              | Mixed     | NR                                          | NR                      | No                      |
| Rittenschober-<br>Böhm, 2018            | Austria              | Health facility | Urban                       | 30.3 <sup>†</sup>                                  | NR        | BV                                          | 670/3643<br>(18.4%)     | No                      |
| Schwab, 2015                            | Indonesia            | Health facility | Urban                       | 26.6 <sup>†</sup> (17-42)                          | NR        | CT, BV, NG                                  | NR                      | NR                      |
| Sperling, 1988                          | USA                  | Health facility | Urban                       | NR                                                 | Mixed     | NR                                          | NR                      | NR                      |
| Usui, 2002                              | Japan                | Health facility | Urban                       | NR                                                 | Asian     | CT                                          | NR                      | No                      |

**Abbreviations:** BV, bacterial vaginosis; CT, *Chlamydia trachomatis*; HIV, human immunodeficiency virus; NG, *Neisseria gonorrhoeae*; NR, not reported; infections; TV, *Trichomonas vaginalis*; USA, United States of America;

<sup>†</sup>reported mean age; <sup>‡</sup>Detected *Mycoplasma genitalium*

## Supporting information

**Table S5.2** Study setting and socio-demographics, case-control studies (n=25)

| <b>First author,<br/>year of<br/>publication</b> | <b>Location of<br/>study</b> | <b>Study setting</b> | <b>Urban<br/>/rural<br/>location</b> | <b>Mean<sup>†</sup>/ median<br/>age years<br/>(range)</b> | <b>Ethnicity</b> | <b>Other infections<br/>included (or excluded)</b>          | <b>Smokers<br/>included/ (%)</b> | <b>Multiple<br/>pregnancies</b> |
|--------------------------------------------------|------------------------------|----------------------|--------------------------------------|-----------------------------------------------------------|------------------|-------------------------------------------------------------|----------------------------------|---------------------------------|
| <b>Ahmadi, 2014</b>                              | Iran                         | Health facility      | Urban                                | 19-43                                                     | NR               | NR                                                          | 3/218 (1.4)                      | NR                              |
| <b>González<br/>Bosquet, 2006</b>                | NR                           | Health facility      | NR/ unclear                          | NR                                                        | NR               | CA, BV-associated<br>bacteria, <i>E. coli</i> , GBS,<br>TV, | NR                               | No                              |
| <b>Cassell, 1983</b>                             | USA                          | Health facility      | Urban                                | NR                                                        | White,<br>Black  | NR                                                          | NR                               | NR                              |
| <b>Chua, 1999</b>                                | Malaysia                     | Health facility      | Urban                                | NR                                                        | NR               | NR                                                          | NR                               | No                              |
| <b>Daskalakis, 2009</b>                          | NR                           | Health facility      | Urban                                | NR                                                        | NR               | NR                                                          | 36/144 (25)                      | No                              |
| <b>Embree,</b>                                   | Canada                       | Health facility      | Urban                                | 14-45                                                     | NR               | NR                                                          | NR                               | Yes                             |
| <b>Farhadifar, 2016</b>                          | Iran                         | Health facility      | Urban                                | 25 (19-43)                                                | NR               | NR                                                          | NR                               | NR                              |
| <b>Freitas, 2018</b>                             | Canada                       | Health facility      | Urban                                | 33 <sup>†</sup> (21-45)                                   | Mixed            | NR                                                          | 4/216 (2.3%)                     | NR                              |
| <b>Harada, 2008</b>                              | Japan                        | Health facility      | Urban                                | NR                                                        | NR               | NR                                                          | NR                               | No                              |

## Supporting information

|                         |                |                 |             |            |       |            |                      |    |
|-------------------------|----------------|-----------------|-------------|------------|-------|------------|----------------------|----|
| <b>Hillier, 1988</b>    | USA            | Health facility | Urban       | NR         | NR    | CT, TV, BV | NR                   | No |
| <b>Holst, 1994</b>      | Sweden         | Health facility | Urban       | NR         | NR    | CT, BV, NG | 20/49 (40.8)         | No |
| <b>Jalava, 2002</b>     | NR             | Health facility | NR/ unclear | NR         | NR    | (CT)       | NR                   | NR |
| <b>Jones, 2009</b>      | United Kingdom | Health facility | Urban       | NR         | NR    | NR         | NR                   | No |
| <b>Kacerovsky, 2009</b> | NR             | Health facility | NR/ unclear | 26 (19-38) | NR    | NR         | NR                   | No |
| <b>Kafetzis, 2004</b>   | Greece         | Health facility | Urban       | NR         | NR    | NR         | NR                   | NR |
| <b>Kumar, 2006</b>      | India          | Health facility | Urban       | NR         | NR    | BV         | NR                   | NR |
| <b>McDonald, 1992</b>   | Australia      | Health facility | Urban       | NR         | NR    | NR         | 839/ 2190<br>(39.8%) | NR |
| <b>Mitsunari, 2005</b>  | Japan          | Health facility | Urban       | NR         | Asian | (CT)       | NR                   | No |
| <b>Montenegro, 2019</b> | Colombia       | Health facility | Urban       | NR         | NR    | NR         | NR                   | NR |
| <b>Munday, 1984</b>     | United Kingdom | Health facility | Urban       | NR         | Mixed | CT         | NR                   | NR |

## Supporting information

|                       |                     |                 |            |       |       |        |               |    |
|-----------------------|---------------------|-----------------|------------|-------|-------|--------|---------------|----|
| <b>Oliveira, 2020</b> | Brazil              | Health facility | Urban      | 27.3  | Mixed | NG ‡   | 5/109 (4.6)   | NR |
| <b>Payne, 2014</b>    | China,<br>Australia | Health facility | NR/unclear | 17-49 | Mixed | NR     | 69/972 (7.1%) | No |
| <b>Povlsen, 2001</b>  | Denmark             | Health facility | Urban      | NR    | NR    | BV     | NR            | No |
| <b>Toth, 1992</b>     | United<br>Kingdom   | Health facility | Urban      | NR    | NR    | CT, TV | NR            | NR |
| <b>Yoon, 2001*</b>    | South Korea         | Health facility | Urban      | NR    | NR    | NR     | NR            | No |

**Abbreviations:** BV, bacterial vaginosis; CA, *Candida albicans*; CT, *Chlamydia trachomatis*; HIV, human immunodeficiency virus; NG, *Neisseria gonorrhoeae*;

NR, not reported; TV, *Trichomonas vaginalis*; USA, United States of America

† Reported mean age; ‡ detected *Mycoplasma genitalium*



## Supporting information

**Table S5.3** Study setting and socio-demographics, cross-sectional studies (n=6)

| <b>First author,<br/>year of<br/>publication</b> | <b>Location<br/>of study</b> | <b>Study setting</b> | <b>Urban<br/>/rural<br/>location</b> | <b>Mean<sup>†</sup>/<br/>median age<br/>years (range)</b> | <b>Ethnicity</b> | <b>Other infections<br/>included (or excluded)</b> | <b>Smokers<br/>included/<br/>(%)</b> | <b>Multiple<br/>pregnancies</b> |
|--------------------------------------------------|------------------------------|----------------------|--------------------------------------|-----------------------------------------------------------|------------------|----------------------------------------------------|--------------------------------------|---------------------------------|
| <b>Abele-Horn, 2000</b>                          | Germany                      | Health facility      | Urban                                | NR                                                        | Mixed            | (BV, CT, NG, TV, yeast)                            | NR                                   | NR                              |
| <b>Grattard, 1995</b>                            | France                       | Health facility      | Urban                                | NR                                                        | NR               | NR                                                 | NR                                   | NR                              |
| <b>Kundsin, 1984</b>                             | USA                          | Health facility      | Urban                                | NR                                                        | Mixed            | NR                                                 | 105/801<br>(31.4%)                   | Yes                             |
| <b>McCormack,<br/>1975</b>                       | USA                          | Health facility      | Urban                                | 23.6 <sup>†</sup>                                         | Mixed            | NR                                                 | NR                                   | Yes                             |
| <b>Nasution, 2007</b>                            | NR                           | Health facility      | NR/ unclear                          | 24-38                                                     | Asian            | CT, NG                                             | NR                                   | NR                              |
| <b>Sweeney, 2016</b>                             | USA                          | Health facility      | Urban                                | NR                                                        | Mixed            | NR                                                 | NR                                   | Yes                             |

**Abbreviations:** BV, bacterial vaginosis; CT, *Chlamydia trachomatis*; HIV, human immunodeficiency virus; NG, *Neisseria gonorrhoeae*; NR, not reported; TV, *Trichomonas vaginalis*; UK, United Kingdom; USA, United States of America

<sup>†</sup> Reported mean age

## Supporting information

**Table S6** Studies that reported on bacterial vaginosis or sexually transmitted infections and reported associations with adverse birth outcomes

| First author,<br>publication year,<br>reference<br>number* | Study population                                                   | Organism/<br>outcome | OR (95% CI)       | Reported associations with genital mycoplasmas                                                                                                                                                                                                                                                                                                                                                                                                                                                                   |
|------------------------------------------------------------|--------------------------------------------------------------------|----------------------|-------------------|------------------------------------------------------------------------------------------------------------------------------------------------------------------------------------------------------------------------------------------------------------------------------------------------------------------------------------------------------------------------------------------------------------------------------------------------------------------------------------------------------------------|
| <b>Donders, 2009</b> <sup>34</sup>                         | Cohort study: 759<br>women; 55 PTB; 64<br>BV; 14 <i>M. hominis</i> | BV/PTB               | 2.43 (1.1, 4.7)   | Association between lactobacilli and PTB, and between BV and PTB reported as primary analysis. Proportion of women with <i>M. hominis</i> but no BV reported (0.5% of 759), but association between <i>M. hominis</i> and PTB in absence of BV could not be calculated from data presented. Discussion includes, "In the literature, the presence of <i>M. hominis</i> has generally been related to an increased risk of miscarriage, and premature delivery if found in combination with bacterial vaginosis." |
| <b>Hillier, 1988</b> <sup>57</sup>                         | Case-control study: 94<br>women; 38 PTB; 28                        | BV/PTB               | 3.31 (1.20, 9.24) | Association between organisms in chorioamnion and PTB reported as primary analysis. BV measured in vaginal                                                                                                                                                                                                                                                                                                                                                                                                       |

Supporting information

| First author,<br>publication year,<br>reference<br>number* | Study population                                                   | Organism/<br>outcome                     | OR (95% CI)                                                 | Reported associations with genital mycoplasmas                                                                                                                                                                                                                                                                                                                                                               |
|------------------------------------------------------------|--------------------------------------------------------------------|------------------------------------------|-------------------------------------------------------------|--------------------------------------------------------------------------------------------------------------------------------------------------------------------------------------------------------------------------------------------------------------------------------------------------------------------------------------------------------------------------------------------------------------|
|                                                            | BV; 29<br><i>U. urealyticum</i> ; 5 <i>M. hominis</i>              |                                          |                                                             | smears. Association between genital mycoplasmas and PTB in absence of BV could not be calculated from data presented.                                                                                                                                                                                                                                                                                        |
| Hillier, 1995 <sup>31</sup>                                | Cohort study: 9105 women; 423 PTB; 1392 BV; 2805 <i>M. hominis</i> | BV/ PTB<br>MH+, BV+/ PTB<br>MH+, BV-/PTB | 1.60 (1.25, 2.03)<br>1.58 (0.94, 2.77)<br>1.18 (0.91, 1.52) | Association between BV and PTB of low birthweight infants reported as primary analysis. Raw data not available for association between <i>M. hominis</i> and PTB, but reported in text and can be extracted from bar chart of ORs for PTB, stratified by <i>M. hominis</i> , bacteroides and BV. OR for BV and BV with <i>M. hominis</i> similar, and stronger than association for <i>M. hominis</i> alone. |

## Supporting information

| First author,<br>publication year,<br>reference<br>number* | Study population                                                        | Organism/<br>outcome | OR (95% CI)         | Reported associations with genital mycoplasmas                                                                                                                                                                                          |
|------------------------------------------------------------|-------------------------------------------------------------------------|----------------------|---------------------|-----------------------------------------------------------------------------------------------------------------------------------------------------------------------------------------------------------------------------------------|
| <b>Kumar, 2006</b> <sup>71</sup>                           | Case-control study:<br>120 women; 60 PTB;<br>31 BV; 6 <i>M. hominis</i> | BV/PTB               | 5.05 (1.97, 12.95)  | Association between BV and PTB reported as primary analysis. Association between <i>M. hominis</i> and PTB in absence of BV could not be calculated from data presented. Discussion does not mention <i>M. hominis</i> .                |
| <b>Menard, 2010</b> <sup>41</sup>                          | Cohort study: 90<br>women; 36 PTB; 2<br>BV; 10 <i>M. hominis</i>        |                      |                     | Association between quantities of BV-associated bacteria and PTB reported as primary analysis. Association between <i>M. hominis</i> and PTB in absence of BV could not be calculated from data presented.                              |
| <b>Odendaal, 2002</b> <sup>50</sup>                        | Cohort study as sub-<br>study of a randomised<br>controlled trial: 395  | MH/BV                | 10.21 (5.63, 18.65) | Association between <i>M. hominis</i> and PTB reported as primary analysis. Association between <i>M. hominis</i> and BV reported, but not association between BV and PTB. Discussion includes, "It is also possible that the BV is not |

## Supporting information

| First author,<br>publication year,<br>reference<br>number* | Study population                                                                               | Organism/<br>outcome                  | OR (95% CI)                                                | Reported associations with genital mycoplasmas                                                                                                                                                                                                                                                                                                                                 |
|------------------------------------------------------------|------------------------------------------------------------------------------------------------|---------------------------------------|------------------------------------------------------------|--------------------------------------------------------------------------------------------------------------------------------------------------------------------------------------------------------------------------------------------------------------------------------------------------------------------------------------------------------------------------------|
|                                                            | women; 119 PTB; 132<br>BV; 83 <i>M. hominis</i>                                                |                                       |                                                            | directly involved in the causation of premature labour but<br>that it is only a marker of a more important underlying<br>condition such as <i>M. hominis</i> infection,"                                                                                                                                                                                                       |
| <b>Povlsen, 2001</b> <sup>64</sup>                         | Nested case-control<br>study: 484 women; 84<br>PTB; 70 BV; 280 <i>U.</i><br><i>urealyticum</i> | BV/PTB<br>UU+, BV+/PTB<br>UU+/PV-/PTB | 0.77 (0.33, 1.6)<br>0.47 (0.09, 3.31)<br>1.15 (0.67, 1.98) | Associations between <i>U. urealyticum</i> biovars and PTB<br>reported as primary analysis. Numbers, stratified by BV<br>status and low birth weight reported. Discussion mentions<br>that <i>U. urealyticum</i> and BV were associated with each other<br>overall, but that this association was only seen in women<br>who delivered at term and was not associated with PTB. |
| <b>Rittenschober-</b><br><b>Bohm, 2018</b> <sup>46</sup>   | Cohort study: 3,643<br>women; 292 PTB; 279                                                     | BV/PTB<br>UP-,BV-/PTB                 | Crude 1.7 (1.3, 2.2)<br>Adjusted 1.6 (1.1, 2.4)            | Associations between <i>Ureaplasma</i> spp. and PTB reported as<br>primary analysis. Associations with <i>U. parvum</i> , stratified by<br>BV status and adjusted for maternal age, diagnosis of vaginal                                                                                                                                                                       |

## Supporting information

| First author,<br>publication year,<br>reference<br>number* | Study population                                                                          | Organism/<br>outcome                      | OR (95% CI)                                                                   | Reported associations with genital mycoplasmas                                                                                                                                                                                                                          |
|------------------------------------------------------------|-------------------------------------------------------------------------------------------|-------------------------------------------|-------------------------------------------------------------------------------|-------------------------------------------------------------------------------------------------------------------------------------------------------------------------------------------------------------------------------------------------------------------------|
|                                                            | BV; 1,347 <i>U. parvum</i> ;<br>214 <i>U. urealyticum</i>                                 | UP+,BV-/PTB<br>UP-,BV+/PTB<br>UP+,BV+/PTB | Adjusted 1.6 (1.2, 2.1)<br>Adjusted 1.6 (1.1, 2.3)<br>Adjusted 2.6 (1.7, 4.0) | candida, smoking and history of previous PTB. Stratified associations with <i>U. urealyticum</i> not reported on basis of univariable analysis (OR 1.4, 95% CI 0.8, 2.2). Discussion does not mention potential associations between both BV and <i>Ureaplasma</i> spp. |
| Schwab, 2015 <sup>52</sup>                                 | Cohort study: 62 women; 23 PTB; 13 BV; 13 <i>M. hominis</i> ;<br>22 <i>U. urealyticum</i> | None reported                             |                                                                               | Descriptive study of infections in pregnancy. Association between <i>M. hominis</i> , <i>U. urealyticum</i> and PTB reported, but not association between BV and PTB.                                                                                                   |

**Abbreviations:** BV, bacterial vaginosis; CI, confidence interval; *M. hominis*, *Mycoplasma hominis*; PTB, premature birth; *U. parvum*, *Ureaplasma parvum*; *U. urealyticum*, *Ureaplasma urealyticum*.

## Supporting information

\* Study reference is the reference number cited in the main manuscript

For peer review only

## Supporting information

**Table S7.1** Risk of bias assessment, cohort studies (n=26)

| Questions                                                                                       | Agger,<br>2014 | Berman,<br>1987 | Braun,<br>1971 | Donders,<br>2009 | Gerber,<br>2003 |
|-------------------------------------------------------------------------------------------------|----------------|-----------------|----------------|------------------|-----------------|
| 1) The method of allocation to exposure groups was unrelated to potential confounding factors   | NA             | NA              | NA             | NA               | NA              |
| 2) Attempts made within design or analysis to balance both groups for potential confounders.    | Yes            | Unclear         | Unclear        | Unclear          | Unclear         |
| 3) The groups were comparable at baseline, including all major confounding factors.             | No             | Yes             | Unclear        | Yes              | Unclear         |
| 4) Based on above answers, was selection bias present?                                          | No             | Low             | Unclear        | Unclear          | Unclear         |
| 5) If so, what is the likely direction of its effect?                                           | Unclear        | Unclear         | Unclear        | Unclear          | Unclear         |
| 6) The comparison groups received the same care and support apart from the exposure(s) studied. | Yes            | Unclear         | Unclear        | Yes              | Unclear         |
| 7) Participants receiving care and support were kept 'blind' to intervention allocation.        | NA             | NA              | NA             | NA               | NA              |



## Supporting information

| Questions                                                                                | Agger,<br>2014      | Berman,<br>1987    | Braun,<br>1971   | Donders,<br>2009 | Gerber,<br>2003   |
|------------------------------------------------------------------------------------------|---------------------|--------------------|------------------|------------------|-------------------|
| 8) Individuals administering care, support were kept 'blind' to intervention allocation. | NA                  | NA                 | NA               | NA               | NA                |
| 9) Based on above answers, was performance bias present?                                 | Unclear             | Unclear            | Unclear          | Unclear          | Unclear           |
| 10) If so, what is the likely direction of its effect?                                   | Unclear             | Unclear            | Unclear          | Unclear          | Unclear           |
| 11) All groups followed up for an equal length of time?                                  | Low                 | Low                | Low              | Low              | Low               |
| 12) Number of participants did not complete the intervention in each group?              | NA                  | NA                 | NA               | NA               | NA                |
| 13) The groups were comparable for intervention completion.                              | NA                  | NA                 | Unclear          | NA               | NA                |
| 14) For how many participants were no outcome data available? <sup>‡</sup>               | 107/783,<br>(13.7%) | 104/1204<br>(8.6%) | 203/688<br>(30%) | 42/801<br>(5.2%) | 63/317<br>(19.9%) |
| 15) Were groups comparable for outcome data?                                             | Unclear             | Unclear            | Unclear          | Yes              | Unclear           |
| 16) Based on above answers, was attrition bias present?                                  | Unclear             | Unclear            | Unclear          | Unclear          | Unclear           |
| 17) If so, what is the likely direction of its effect?                                   | Unclear             | Unclear            | Unclear          | Unclear          | Unclear           |
| 18) The study had an appropriate length of follow-up.                                    | Yes                 | Yes                | Yes              | Yes              | Yes               |
| 19) The study used a precise definition of outcome.                                      | Yes                 | Unclear            | No               | Yes              | Yes               |

## Supporting information

| Questions                                                                          | Agger,<br>2014 | Berman,<br>1987 | Braun,<br>1971 | Donders,<br>2009 | Gerber,<br>2003 |
|------------------------------------------------------------------------------------|----------------|-----------------|----------------|------------------|-----------------|
| 20) A valid, reliable method used to determine the outcome?                        | Unclear        | Unclear         | No             | Yes              | Yes             |
| 21) Investigators were kept 'blind' to participants' exposure to the intervention. | NA             | NA              | NA             | NA               | NA              |
| 22) Investigators were kept 'blind' to other important confounding factors.        | Unclear        | Unclear         | Unclear        | Unclear          | Unclear         |
| 23) Based on above answers, was detection bias present?                            | Unclear        | Unclear         | Unclear        | No               | Unclear         |
| 24) If so, what is the likely direction of its effect?                             | Unclear        | Unclear         | Unclear        | NA               | Unclear         |
| <b>25) Overall assessment of internal validity<sup>a</sup></b>                     | +              | -               | +              | +                | +               |
| <b>26) Overall assessment of external validity<sup>a</sup></b>                     | +              | +               | -              | +                | -               |

**Abbreviations:** High, high risk of bias; Low, low risk of bias; NA, not applicable; Unclear, unclear of risk of bias;

‡, both groups combined unless stated; <sup>a</sup>++, all or most of checklist criteria fulfilled; + some of checklist criteria fulfilled; - few or no checklist criteria fulfilled.

## Supporting information

**Table S7.1** Risk of bias assessment, cohort studies (n=26) (continued)

| Questions                                                                                       | Govender,<br>2009 | Harrison,<br>1983 | Hillier,<br>1995 | Kataoka,<br>2006 | Koucky,<br>2016 |
|-------------------------------------------------------------------------------------------------|-------------------|-------------------|------------------|------------------|-----------------|
| 1) The method of allocation to exposure groups was unrelated to potential confounding factors   | NA                | NA                | NA               | NA               | NA              |
| 2) Attempts made within design or analysis to balance both groups for potential confounders.    | Unclear           | Unclear           | Unclear          | Yes              | Unclear         |
| 3) The groups were comparable at baseline, including all major confounding factors.             | Unclear           | Unclear           | Unclear          | No               | Unclear         |
| 4) Based on above answers, was selection bias present?                                          | Unclear           | Unclear           | Unclear          | Unclear          | Unclear         |
| 5) If so, what is the likely direction of its effect?                                           | Unclear           | Unclear           |                  | Unclear          | Unclear         |
| 6) The comparison groups received the same care and support apart from the exposure(s) studied. | Unclear           | Yes               | Yes              | Yes              | Yes             |
| 7) Participants receiving care and support were kept 'blind' to intervention allocation.        | NA                | NA                | NA               | NA               | NA              |

## Supporting information

| Questions                                                                                   | Govender,<br>2009 | Harrison,<br>1983                        | Hillier,<br>1995       | Kataoka,<br>2006    | Koucky,<br>2016 |
|---------------------------------------------------------------------------------------------|-------------------|------------------------------------------|------------------------|---------------------|-----------------|
| 8) Individuals administering care and support were kept 'blind' to intervention allocation. | NA                | NA                                       | NA                     | NA                  | NA              |
| 9) Based on above answers, was performance bias present?                                    | Unclear           | Unclear                                  | Unclear                | Unclear             | Unclear         |
| 10) If so, what is the likely direction of its effect?                                      | Unclear           | Unclear                                  | Unclear                | Unclear             | Unclear         |
| 11) All groups followed up for an equal length of time?                                     | Low               | Low                                      | Low                    | Low                 | Low             |
| 12) Number of participants did not complete the intervention in each group?                 | NA                | NA                                       | Na                     | NA                  | NA              |
| 13) The groups were comparable for intervention completion.                                 | NA                | NA                                       | NA                     | NA                  | NA              |
| 14) For how many participants were no outcome data available? <sup>‡</sup>                  | 0/199 (0%)        | SA (13/361),<br>3.6%; PND<br>(0/467, 0%) | 1292/1039<br>7 (12.4%) | 163/1040<br>(15.7%) | 0/36 (0%)       |
| 15) Were groups comparable for outcome data?                                                | Unclear           | Unclear                                  | No                     | Unclear             | Yes             |
| 16) Based on above answers, was attrition bias present?                                     | Unclear           | Unclear                                  | Unclear                | Unclear             | Unclear         |
| 17) If so, what is the likely direction of its effect?                                      | Unclear           | Unclear                                  | Unclear                | Unclear             | Unclear         |
| 18) The study had an appropriate length of follow-up.                                       | Yes               | Yes                                      | Yes                    | Yes                 | Yes             |

## Supporting information

| Questions                                                                          | Govender,<br>2009 | Harrison,<br>1983 | Hillier,<br>1995 | Kataoka,<br>2006 | Koucky,<br>2016 |
|------------------------------------------------------------------------------------|-------------------|-------------------|------------------|------------------|-----------------|
| 19) The study used a precise definition of outcome.                                | Yes               | No                | Yes              | Yes              | Yes             |
| 20) A valid, reliable method used to determine the outcome?                        | Unclear           | Unclear           | No               | Yes              | Yes             |
| 21) Investigators were kept 'blind' to participants' exposure to the intervention. | NA                | NA                | NA               | NA               | NA              |
| 22) Investigators were kept 'blind' to other important confounding factors.        | Unclear           | Unclear           | Unclear          | Unclear          | Unclear         |
| 23) Based on above answers, was detection bias present?                            | Unclear           | Unclear           | Unclear          | No               | Unclear         |
| 24) If so, what is the likely direction of its effect?                             | Unclear           | Unclear           | Unclear          | NA               | Unclear         |
| <b>25) Overall assessment of internal validity<sup>a</sup></b>                     | -                 | -                 | -                | +                | +               |
| <b>26) Overall assessment of external validity<sup>a</sup></b>                     | -                 | -                 | -                | +                | +               |

**Abbreviations:** High, high risk of bias; Low, low risk of bias; NA, not applicable; Unclear, unclear of risk of bias;

‡, both groups combined unless stated; <sup>a</sup>++, all or most of checklist criteria fulfilled; + some of checklist criteria fulfilled; - few or no checklist criteria fulfilled.

## Supporting information

**Table S7.1** Risk of bias assessment, cohort studies (n=26) (continued)

| Questions                                                                                       | Kwak,<br>2014 | Lee,<br>2016 | Luton,<br>1994 | McDonald,<br>1994 | Menard,<br>2010 |
|-------------------------------------------------------------------------------------------------|---------------|--------------|----------------|-------------------|-----------------|
| 1) The method of allocation to exposure groups was unrelated to potential confounding factors   | NA            | NA           | NA             | NA                | NA              |
| 2) Attempts made within design or analysis to balance both groups for potential confounders.    | Unclear       | Unclear      | Yes            | Yes               | Unclear         |
| 3) The groups were comparable at baseline, including all major confounding factors.             | Unclear       | Unclear      | Yes            | Unclear           | Unclear         |
| 4) Based on above answers, was selection bias present?                                          | Unclear       | Unclear      | Low            | Unclear           | Unclear         |
| 5) If so, what is the likely direction of its effect?                                           | Unclear       | Unclear      | Unclear        | Unclear           | Unclear         |
| 6) The comparison groups received the same care and support apart from the exposure(s) studied. | Unclear       | Unclear      | Yes            | Unclear           | Yes             |
| 7) Participants receiving care and support were kept 'blind' to intervention allocation.        | NA            | NA           | NA             | NA                | NA              |
| 8) Individuals administering care and support were kept 'blind' to intervention allocation.     | NA            | NA           | NA             | NA                | NA              |
| 9) Based on above answers, was performance bias present?                                        | Unclear       | Unclear      | Unclear        | Unclear           | Unclear         |

## Supporting information

| Questions                                                                   | Kwak,<br>2014 | Lee,<br>2016   | Luton,<br>1994  | McDonald,<br>1994                                   | Menard,<br>2010 |
|-----------------------------------------------------------------------------|---------------|----------------|-----------------|-----------------------------------------------------|-----------------|
| 10) If so, what is the likely direction of its effect?                      | Unclear       | Unclear        | Unclear         | Unclear                                             | Unclear         |
| 11) All groups followed up for an equal length of time?                     | Low           | Low            | Low             | Low                                                 | Low             |
| 12) Number of participants did not complete the intervention in each group? | NA            | NA             | NA              | NA                                                  | NA              |
| 13) The groups were comparable for intervention completion.                 | NA            | NA             | NA              | NA                                                  | NA              |
| 14) For how many participants were no outcome data available? <sup>‡</sup>  | 0 (0%)        | 0/1035<br>(0%) | 37/218<br>(17%) | Control<br>182/649, (28%);<br>Cases 42/135<br>(31%) | 0 (0%)          |
| 15) Were groups comparable for outcome data?                                | Yes           | Yes            | No              | Unclear                                             | Yes             |
| 16) Based on above answers, was attrition bias present?                     | Low           | Low            | Unclear         | Unclear                                             | Unclear         |
| 17) If so, what is the likely direction of its effect?                      | Unclear       | Unclear        | Unclear         | Unclear                                             | Unclear         |
| 18) The study had an appropriate length of follow-up.                       | Yes           | Yes            | Yes             | Yes                                                 | Yes             |
| 19) The study used a precise definition of outcome.                         | Yes           | No             | Yes             | Yes                                                 | Yes             |
| 20) A valid, reliable method used to determine the outcome?                 | Yes           | No             | Yes             | No                                                  | Yes             |

## Supporting information

| Questions                                                                          | Kwak,<br>2014 | Lee,<br>2016 | Luton,<br>1994 | McDonald,<br>1994 | Menard,<br>2010 |
|------------------------------------------------------------------------------------|---------------|--------------|----------------|-------------------|-----------------|
| 21) Investigators were kept 'blind' to participants' exposure to the intervention. | NA            | NA           | NA             | Unclear           | NA              |
| 22) Investigators were kept 'blind' to other important confounding factors.        | Unclear       | Unclear      | Unclear        | Unclear           | NA              |
| 23) Based on above answers, was detection bias present?                            | No            | Yes          | Unclear        | Unclear           | No              |
| 24) If so, what is the likely direction of its effect?                             | NA            | Unclear      | Unclear        | Unclear           | NA              |
| <b>25) Overall assessment of internal validity<sup>a</sup></b>                     | +             | -            | -              | -                 | -               |
| <b>26) Overall assessment of external validity<sup>a</sup></b>                     | +             | -            | -              | -                 | -               |

**Abbreviations:** High, high risk of bias; Low, low risk of bias; NA, not applicable; Unclear, unclear of risk of bias.

‡, both groups combined unless stated; <sup>a</sup>++, all or most of checklist criteria fulfilled; + some of checklist criteria fulfilled; - few or no checklist criteria fulfilled.



## Supporting information

**Table S7.1** Risk of bias assessment, cohort studies (n=26) (continued)

| Questions                                                                                       | Minkoff,<br>1984 | Nguyen,<br>2004 | Odendaal,<br>2002 | Payne,<br>2016 | Payne,<br>2020 |
|-------------------------------------------------------------------------------------------------|------------------|-----------------|-------------------|----------------|----------------|
| 1) The method of allocation to exposure groups was unrelated to potential confounding factors   | NA               | NA              | NA                | NA             | NA             |
| 2) Attempts made within design or analysis to balance both groups for potential confounders.    | Unclear          | Unclear         | Unclear           | Unclear        | No             |
| 3) The groups were comparable at baseline, including all major confounding factors.             | Unclear          | Unclear         | Unclear           | Unclear        | Unclear        |
| 4) Based on above answers, was selection bias present?                                          | Unclear          | Unclear         | Unclear           | Unclear        | Low            |
| 5) If so, what is the likely direction of its effect?                                           | Unclear          | Unclear         | Unclear           | Unclear        | Unclear        |
| 6) The comparison groups received the same care and support apart from the exposure(s) studied. | Unclear          | Unclear         | Yes               | Unclear        | Yes            |
| 7) Participants receiving care and support were kept 'blind' to intervention allocation.        | NA               | NA              | NA                | NA             | NA             |

## Supporting information

| Questions                                                                                   | Minkoff,<br>1984                          | Nguyen,<br>2004   | Odendaal,<br>2002 | Payne,<br>2016   | Payne,<br>2020    |
|---------------------------------------------------------------------------------------------|-------------------------------------------|-------------------|-------------------|------------------|-------------------|
| 8) Individuals administering care and support were kept 'blind' to intervention allocation. | NA                                        | NA                | NA                | NA               | NA                |
| 9) Based on above answers, was performance bias present?                                    | Unclear                                   | Unclear           | Unclear           | Unclear          | Unclear           |
| 10) If so, what is the likely direction of its effect?                                      | Unclear                                   | Unclear           | Unclear           | Unclear          | Unclear           |
| 11) All groups followed up for an equal length of time?                                     | Low                                       | Low               | Low               | Low              | Low               |
| 12) Number of participants did not complete the intervention in each group?                 | NA                                        | NA                | NA                | NA               | NA                |
| 13) The groups were comparable for intervention completion.                                 | NA                                        | NA                | NA                | NA               | NA                |
| 14) For how many participants were no outcome data available? <sup>‡</sup>                  | PROM 45/233 (19.3%);<br>PTB 15/233 (6.4%) | 61/456<br>(13.4%) | 31/426<br>(7.3%)  | 15/206<br>(7.3%) | 6.4%<br>(64/1000) |
| 15) Were groups comparable for outcome data?                                                | Unclear                                   | Yes               | Yes               | Yes              | Unclear           |
| 16) Based on above answers, was attrition bias present?                                     | Unclear                                   | Low               | Unclear           | Unclear          | Low               |
| 17) If so, what is the likely direction of its effect?                                      | Unclear                                   | Unclear           | Unclear           | Unclear          | Unclear           |

## Supporting information

| Questions                                                                          | Minkoff,<br>1984 | Nguyen,<br>2004 | Odendaal,<br>2002 | Payne,<br>2016 | Payne,<br>2020 |
|------------------------------------------------------------------------------------|------------------|-----------------|-------------------|----------------|----------------|
| 18) The study had an appropriate length of follow-up.                              | Yes              | Yes             | Yes               | Yes            | Yes            |
| 19) The study used a precise definition of outcome.                                | Yes              | Yes             | Yes               | Yes            | Yes            |
| 20) A valid, reliable method used to determine the outcome?                        | Yes              | Unclear         | Yes               | Unclear        | Unclear        |
| 21) Investigators were kept 'blind' to participants' exposure to the intervention. | NA               | NA              | NA                | NA             | NA             |
| 22) Investigators were kept 'blind' to other important confounding factors.        | Unclear          | Unclear         | Unclear           | Unclear        | Unclear        |
| 23) Based on above answers, was detection bias present?                            | No               | Unclear         | Unclear           | Unclear        | No             |
| 24) If so, what is the likely direction of its effect?                             | NA               | Unclear         | Unclear           | Unclear        | NA             |
| <b>25) Overall assessment of internal validity<sup>a</sup></b>                     | -                | +               | +                 | +              | +              |
| <b>26) Overall assessment of external validity<sup>a</sup></b>                     | -                | +               | -                 | +              | +              |

**Abbreviations:** AO, adverse outcomes; High, high risk of bias; Low, low risk of bias; NA, not applicable; NK, not known; STI, sexually transmitted infections; Unclear, unclear of risk of bias;

‡, both groups combined unless stated; <sup>a</sup>++, all or most of checklist criteria fulfilled; + some of checklist criteria fulfilled; - few or no checklist criteria fulfilled.

## Supporting information

**Table S7.1** Risk of bias assessment, cohort studies (n=26) (continued)

| Questions                                                                                       | Peretz, 2020 | Perni, 2004 | Rittenschober, 2018 | Schwab, 2015 | Sperling, 1988 | Usui, 2002 |
|-------------------------------------------------------------------------------------------------|--------------|-------------|---------------------|--------------|----------------|------------|
| 1) The method of allocation to exposure groups was unrelated to potential confounding factors   | NA           | NA          | NA                  | NA           | NA             | NA         |
| 2) Attempts made within design or analysis to balance both groups for potential confounders.    | Yes          | Unclear     | Yes                 | No           | Unclear        | Unclear    |
| 3) The groups were comparable at baseline, including all major confounding factors.             | Unclear      | Unclear     | Unclear             | Unclear      | Unclear        | Unclear    |
| 4) Based on above answers, was selection bias present?                                          | Unclear      | Unclear     | Low                 | High         | Unclear        | Unclear    |
| 5) If so, what is the likely direction of its effect?                                           | Unclear      | Unclear     | Unclear             | Unclear      | Unclear        | Unclear    |
| 6) The comparison groups received the same care and support apart from the exposure(s) studied. | Yes          | Unclear     | Unclear             | Unclear      | Yes            | Yes        |
| 7) Participants receiving care and support were kept 'blind' to intervention allocation.        | NA           | NA          | NA                  | NA           | NA             | NA         |

## Supporting information

| Questions                                                                                   | Peretz, 2020                            | Perni, 2004      | Rittenschober, 2018  | Schwab, 2015      | Sperling, 1988  | Usui, 2002 |
|---------------------------------------------------------------------------------------------|-----------------------------------------|------------------|----------------------|-------------------|-----------------|------------|
| 8) Individuals administering care and support were kept 'blind' to intervention allocation. | NA                                      | NA               | NA                   | NA                | NA              | NA         |
| 9) Based on above answers, was performance bias present?                                    | Unclear                                 | Unclear          | Unclear              | Unclear           | Unclear         | Low        |
| 10) If so, what is the likely direction of its effect?                                      | Unclear                                 | Unclear          | Unclear              | Unclear           | Unclear         | NA         |
| 11) All groups followed up for an equal length of time?                                     | Low                                     | Low              | Low                  | Low               | Low             | Low        |
| 12) Number of participants did not complete the intervention in each group?                 | NA                                      | NA               | NA                   | NA                | NA              | NA         |
| 13) The groups were comparable for intervention completion.                                 | NA                                      | NA               | NA                   | NA                | NA              | NA         |
| 14) For how many participants were no outcome data available? <sup>‡</sup>                  | PTB 91% (195/214);<br>LBW 90% (192/214) | 14/193<br>(7.3%) | 687/4330;<br>(15.9%) | 97/159<br>(61.0%) | 1.2%<br>(5/409) | 0,0%       |
| 15) Were groups comparable for outcome data?                                                | No                                      | Unclear          | Unclear              | Unclear           | Yes             | Yes        |
| 16) Based on above answers, was attrition bias present?                                     | High                                    | Unclear          | Unclear              | High              | Low             | Low        |
| 17) If so, what is the likely direction of its effect?                                      | Unclear                                 | Unclear          | Unclear              | Unclear           | NA              | NA         |
| 18) The study had an appropriate length of follow-up.                                       | Yes                                     | Yes              | Yes                  | Yes               | Yes             | Yes        |

## Supporting information

| Questions                                                                          | Peretz, 2020 | Perni, 2004 | Rittenschober, 2018 | Schwab, 2015 | Sperling, 1988 | Usui, 2002 |
|------------------------------------------------------------------------------------|--------------|-------------|---------------------|--------------|----------------|------------|
| 19) The study used a precise definition of outcome.                                | Yes          | Yes         | Yes                 | Yes          | Yes            | Yes        |
| 20) A valid, reliable method used to determine the outcome?                        | Yes          | Unclear     | Yes                 | No           | No             | Yes        |
| 21) Investigators were kept 'blind' to participants' exposure to the intervention. | NA           | NA          | NA                  | NA           | NA             | NA         |
| 22) Investigators were kept 'blind' to other important confounding factors.        | NA           | Unclear     | Unclear             | Unclear      | Unclear        | Unclear    |
| 23) Based on above answers, was detection bias present?                            | No           | Unclear     | No                  | Yes          | Unclear        | Unclear    |
| 24) If so, what is the likely direction of its effect?                             | NA           | Unclear     | NA                  | Unclear      | Unclear        | Unclear    |
| <b>25) Overall assessment of internal validity<sup>a</sup></b>                     | -            | +           | +                   | -            | -              | +          |
| <b>26) Overall assessment of external validity<sup>a</sup></b>                     | -            | +           | +                   | -            | -              | -          |

**Abbreviations:** AO, adverse outcomes; High, high risk of bias; Low, low risk of bias; NA, not applicable; NK, not known; STI, sexually transmitted infections; Unclear, unclear of risk of bias.

‡, both groups combined unless stated; <sup>a</sup>++, all or most of checklist criteria fulfilled; + some of checklist criteria fulfilled; - few or no checklist criteria fulfilled.

## Supporting information

**Table S7.2** Risk of bias assessment, case-control studies (n=25)

| Questions                                                               | Ahmadi,<br>2014 | Cassell,<br>1993 | Chua,<br>1999 | Daskalakis,<br>2009 | Embree,<br>1980 | Farhadifar,<br>2016 | Freitas,<br>2018 |
|-------------------------------------------------------------------------|-----------------|------------------|---------------|---------------------|-----------------|---------------------|------------------|
| 1) Appropriate and clearly focused question.                            | WC              | WC               | WC            | WC                  | AA              | WC                  | AA               |
| 2) The cases and controls are taken from comparable populations.        | AA              | WC               | WC            | AA                  | PA              | AA                  | PA               |
| 3) The same exclusion criteria are used for both cases and controls.    | WC              | NA               | PA            | WC                  | NAd             | AA                  | NAd              |
| 4) What was the participation rate (%) for each group (cases)?          | Unclear         | 87.9 (29/33)     | Unclear       | Unclear             | 100%<br>(n=446) | Unclear             | 100% (n=46)      |
| 5) What was the participation rate (%) for each group (controls)?       | Unclear         | 100 (28/28)      | Unclear       | Unclear             | 100%<br>(n=108) | Unclear             | 100%<br>(n=170)  |
| 6) Both groups compared to establish their similarities or differences. | NAd             | NAd              | NAd           | NAd                 | NAd             | NAd                 | AA               |
| 7) Cases are clearly defined and differentiated from controls.          | WC              | AA               | AA            | WC                  | AA              | WC                  | AA               |

## Supporting information

| Questions                                                                                       | Ahmadi,<br>2014 | Cassell,<br>1993 | Chua,<br>1999 | Daskalakis,<br>2009 | Embree,<br>1980 | Farhadifar,<br>2016 | Freitas,<br>2018 |
|-------------------------------------------------------------------------------------------------|-----------------|------------------|---------------|---------------------|-----------------|---------------------|------------------|
| 8) It is clearly established that controls are not cases.                                       | WC              | AA               | AA            | WC                  | AA              | WC                  | AA               |
| 9) Measures taken to prevent knowledge of primary exposure from influencing case ascertainment. | NA              | NA               | NA            | NA                  | NA              | NA                  | NA               |
| 10) Exposure status is measured in a standard, valid and reliable way.                          | WC              | AA               | AA            | WC                  | AA              | AA                  | WC               |
| 11) Main potential confounders are accounted for in design/analysis                             | AA              | PA               | NR            | AA                  | PA              | AA                  | PA               |
| 12) Confidence intervals provided?                                                              | No              | No               | No            | No                  | No              | Yes                 | No               |
| <b>13) Study results internally valid<sup>a</sup></b>                                           | +               | +                | +             | +                   | -               | +                   | +                |
| <b>14) Study results externally valid<sup>a</sup></b>                                           | +               | -                | +             | +                   | -               | +                   | -                |

**Abbreviations:** AA, adequately addressed; NAd, not addressed; NA, not applicable; PA, poorly addressed; WC, well covered; Unclear, does not have data on how many were excluded or declined to participate but only present numbers

<sup>a</sup>++, all or most of checklist criteria fulfilled; + some of checklist criteria fulfilled; - few or no checklist criteria fulfilled.



## Supporting information

**Table S7.2** Risk of bias assessment, case-control studies (n=25) (continued)

| Questions                                                                                       | González<br>Bosquet,<br>2006 | Harada,<br>2008 | Hillier,<br>1988  | Holst,<br>1994   | Jalava,<br>2002 | Jones,<br>2009 |
|-------------------------------------------------------------------------------------------------|------------------------------|-----------------|-------------------|------------------|-----------------|----------------|
| 1) Appropriate and clearly focused question.                                                    | WC                           | WC              | WC                | WC               | NR              | WC             |
| 2) The cases and controls are taken from comparable populations.                                | AA                           | AA              | AA                | PA               | AA              | PA             |
| 3) The same exclusion criteria are used for both cases and controls.                            | AA                           | AA              | PA                | AA               | PA              | NAd            |
| 4) What was the participation rate for each group (cases)? %                                    | Unclear                      | Unclear         | 99/107 (92.5%)    | 40.8<br>(49/120) | 100<br>(n=50)   | Unclear        |
| 5) What was the participation rate for each group (controls)? %                                 | Unclear                      | Unclear         | 68/140<br>(48.6%) | 100 (38/38)      | 72 (72/100)     | Unclear        |
| 6) Both groups compared to establish their similarities or differences.                         | NAd                          | NAd             | NAd               | NAd              | NAd             | NAd            |
| 7) Cases are clearly defined and differentiated from controls.                                  | WC                           | AA              | WC                | WC               | WC              | AA             |
| 8) It is clearly established that controls are not cases.                                       | WC                           | AA              | WC                | WC               | AA              | AA             |
| 9) Measures taken to prevent knowledge of primary exposure from influencing case ascertainment. | NA                           | NA              | NA                | NA               | NA              | NA             |

## Supporting information

| Questions                                                               | González<br>Bosquet,<br>2006 | Harada,<br>2008 | Hillier,<br>1988 | Holst,<br>1994 | Jalava,<br>2002 | Jones,<br>2009 |
|-------------------------------------------------------------------------|------------------------------|-----------------|------------------|----------------|-----------------|----------------|
| 10) Exposure status is measured in a standard, valid, and reliable way. | AA                           | WC              | AA               | AA             | WC              | WC             |
| 11) Main potential confounders are accounted for in design/analysis     | PA                           | PA              | WC               | AA             | NAd             | NAd            |
| 12) Confidence intervals provided?                                      | No                           | Yes             | Yes              | No             | No              | No             |
| <b>13) Study results internally valid<sup>a</sup></b>                   | +                            | +               | +                | ++             | +               | -              |
| <b>14) Study results externally valid<sup>a</sup></b>                   | +                            | +               | +                | +              | +               | -              |

**Abbreviations:** AA, adequately addressed; NAd, not addressed; NA, not applicable; PA, poorly addressed; WC, well covered; Unclear, does not have data on how many were excluded or declined to participate but only present numbers.

<sup>a</sup> ++, all or most of checklist criteria fulfilled; + some of checklist criteria fulfilled; - few or no checklist criteria fulfilled.

## Supporting information

**Table S7.2** Risk of bias assessment, case-control studies (n=25) (continued)

| Questions                                                                                       | Kacarovsky,<br>2009 | Kafetzis,<br>2004 | Kumar,<br>2006 | McDonald,<br>1992 | Matsunari,<br>2005 | Montenegro,<br>2019 |
|-------------------------------------------------------------------------------------------------|---------------------|-------------------|----------------|-------------------|--------------------|---------------------|
| 1) Appropriate and clearly focused question.                                                    | WC                  | WC                | AA             | AA                | WC                 | WC                  |
| 2) The cases and controls are taken from comparable populations.                                | PA                  | WC                | PA             | AA                | WC                 | AA                  |
| 3) The same exclusion criteria are used for both cases and controls.                            | PA                  | NR                | NAd            | PA                | WC                 | AA                  |
| 4) What was the participation rate for each group (cases)?                                      | Unclear             | Unclear           | 100% (n=60)    | Unclear           | 57.5 (23/40)       | 84 (100%)           |
| 5) What was the participation rate for each group (controls)?                                   | Unclear             | Unclear           | 100% (n=60)    | Unclear           | 60.8 (59/97)       | 127<br>(1000%)      |
| 6) Both groups compared to establish their similarities or differences.                         | NAd                 | NAd               | NAd            | AA                | NA                 | NA                  |
| 7) Cases are clearly defined and differentiated from controls.                                  | WC                  | WC                | NAd            | AA                | AA                 | AA                  |
| 8) It is clearly established that controls are not cases.                                       | PA                  | WC                | AA             | AA                | AA                 | AA                  |
| 9) Measures taken to prevent knowledge of primary exposure from influencing case ascertainment. | NA                  | NA                | NA             | NA                | NA                 | NA                  |

## Supporting information

| Questions                                                               | Kacerovsky,<br>2009 | Kafetzis,<br>2004 | Kumar,<br>2006 | McDonald,<br>1992 | Matsunari,<br>2005 | Montenegro,<br>2019 |
|-------------------------------------------------------------------------|---------------------|-------------------|----------------|-------------------|--------------------|---------------------|
| 10) Exposure status is measured in a standard, valid, and reliable way. | AA                  | WC                | PA             | PA                | WC                 | WC                  |
| 11) Main potential confounders are accounted for in design/analysis     | PA                  | NAd               | NAd            | AA                | PA                 | PA                  |
| 12) Confidence intervals provided?                                      | No                  | No                | No             | Yes               | No                 | No                  |
| <b>13) Study results internally valid<sup>a</sup></b>                   | -                   | +                 | -              | +                 | +                  | +                   |
| <b>14) Study results externally valid<sup>a</sup></b>                   | -                   | +                 | -              | +                 | +                  | +                   |

**Abbreviations:** AA, adequately addressed; NAd, not addressed; NA, not applicable; PA, poorly addressed; WC, well covered; Unclear, does not have data on how many were excluded or declined to participate but only present numbers

<sup>a</sup>++, all or most of checklist criteria fulfilled; + some of checklist criteria fulfilled; - few or no checklist criteria fulfilled.

## Supporting information

**Table S7.2** Risk of bias assessment, case-control studies (n=25) (continued)

| Questions                                                                                       | Munday,<br>1984 | Oliveira,<br>2020 | Payne,<br>2014 | Povlsen,<br>2001 | Toth,<br>1992 | Yoon,<br>2001 |
|-------------------------------------------------------------------------------------------------|-----------------|-------------------|----------------|------------------|---------------|---------------|
| 1) Appropriate and clearly focused question.                                                    | WC              | AA                | WC             | WC               | WC            | WC            |
| 2) The cases and controls are taken from comparable populations.                                | AA              | PA                | WC             | WC               | AA            | AA            |
| 3) The same exclusion criteria are used for both cases and controls.                            | NAd             | PA                | AA             | NAd              | PA            | PA            |
| 4) What was the participation rate for each group (cases)?                                      | Unclear         | 100%              | 100%           | Unclear          | Unclear       | Unclear       |
| 5) What was the participation rate for each group (controls)?                                   | Unclear         | 100%              | 100%           | Unclear          | Unclear       | Unclear       |
| 6) Both groups compared to establish their similarities or differences.                         | NA              | AA                | NAd            | NA               | NA            | NA            |
| 7) Cases are clearly defined and differentiated from controls.                                  | PA              | WC                | AA             | AA               | PA            | WC            |
| 8) It is clearly established that controls are not cases.                                       | PA              | WC                | PA             | PA               | PA            | WC            |
| 9) Measures taken to prevent knowledge of primary exposure from influencing case ascertainment. | NA              | NA                | NAd            | NA               | NA            | NA            |
| 10) Exposure status is measured in a standard, valid, and reliable way.                         | AA              | AA                | AA             | AA               | PA            | WC            |
| 11) Main potential confounders are accounted for in design/analysis                             | PA              | AA                | NAd            | NAd              | PA            | AA            |
| 12) Confidence intervals provided?                                                              | No              | Yes               | Yes            | Yes              | No            | No            |

## Supporting information

| Questions                                       | Munday,<br>1984 | Oliveira,<br>2020 | Payne,<br>2014 | Povlsen,<br>2001 | Toth,<br>1992 | Yoon,<br>2001 |
|-------------------------------------------------|-----------------|-------------------|----------------|------------------|---------------|---------------|
| 13) Study results internally valid <sup>a</sup> | +               | +                 | +              | +                | -             | +             |
| 14) Study results externally valid <sup>a</sup> | -               | +                 | +              | +                | -             | +             |

**Abbreviations:** AA, adequately addressed; NAd, not addressed; NA, not applicable; PA, poorly addressed; Unclear, does not have data on how many were excluded or declined to participate but only present numbers; WC, well covered.

<sup>a</sup>++, all or most of checklist criteria fulfilled; + some of checklist criteria fulfilled; - few or no checklist criteria fulfilled.

## Supporting information

**Table S7.3** Risk of bias assessment, cross-sectional studies (n=6)

| Questions                                                                           | Abele-Horn,<br>2000 | Grattard,<br>1995 | Kundsin,<br>1984 | McCormack,<br>1975 | Nasution,<br>2007 | Sweeney,<br>2016 |
|-------------------------------------------------------------------------------------|---------------------|-------------------|------------------|--------------------|-------------------|------------------|
| 1) Is the source population, source area well described?                            | +                   | +                 | NR               | -                  | NR                | +                |
| 2) Is the eligible population or area representative of the source population?      | -                   | +                 | NR               | -                  | NR                | -                |
| 3) Do the selected participants or areas represent the eligible population or area? | -                   | NR                | -                | -                  | NR                | -                |
| 4) Selection of exposure (and comparison) group. How was selection bias minimised?  | NR                  | NR                | NR               | NR                 | NR                | NR               |
| 5) Was the selection of explanatory variables based on a sound theoretical basis?   | +                   | -                 | +                | -                  | +                 | +                |
| 6) Was the contamination acceptably low?                                            | NA                  | NA                | NA               | NA                 | NR                | NA               |
| 7) How well were likely confounding factors identified and controlled?              | +                   | NR                | NR               | NR                 | NR                | -                |
| 8) Outcome measures and procedures reliable?                                        | +                   | -                 | +                | -                  | +                 | -                |
| 9) Were the outcome measurements complete?                                          | +                   | +                 | +                | +                  | ++                | +                |

## Supporting information

|                                                                                     |    |    |    |    |    |    |
|-------------------------------------------------------------------------------------|----|----|----|----|----|----|
| 10) Were all the important outcomes assessed?                                       | -  | +  | +  | +  | +  | ++ |
| 11) Was there a similar follow-up time in exposure and comparison groups?           | +  | -  | ++ | +  | ++ | +  |
| 12) Was follow-up time meaningful?                                                  | +  | +  | ++ | +  | ++ | +  |
| 13) Was the study sufficiently powered to detect an exposure effect (if one exists) | NA | NA | NA | NA | NR | NA |
| 14) Were multiple explanatory variables considered in analyses?                     | NR | NR | NR | NR | NR | NR |
| 15) Were the analytical methods appropriate?                                        | +  | -  | -  | +  | -  | +  |
| 16) Was the precision of association given or calculable?                           | +  | +  | +  | +  | +  | +  |
| <b>17) Overall assessment of internal validity<sup>a</sup></b>                      | -  | -  | -  | +  | -  | +  |
| <b>18) Overall assessment of external validity<sup>a</sup></b>                      | -  | +  | +  | -  | -  | -  |

**Abbreviations:** ++, yes; +, mostly; -, no; NR, not reported; NA, not applicable.

<sup>a</sup> ++, all or most of checklist criteria fulfilled; + some of checklist criteria fulfilled; - few or no checklist criteria fulfilled.



# BMJ Open

## Adverse pregnancy and birth outcomes associated with *Mycoplasma hominis*, *Ureaplasma urealyticum* and *Ureaplasma parvum*: A systematic review and meta-analysis

|                                 |                                                                                                                                                                                                                                                                                                                                                                                                                                                                                                                                                                                                                                                                                                                                                                              |
|---------------------------------|------------------------------------------------------------------------------------------------------------------------------------------------------------------------------------------------------------------------------------------------------------------------------------------------------------------------------------------------------------------------------------------------------------------------------------------------------------------------------------------------------------------------------------------------------------------------------------------------------------------------------------------------------------------------------------------------------------------------------------------------------------------------------|
| Journal:                        | <i>BMJ Open</i>                                                                                                                                                                                                                                                                                                                                                                                                                                                                                                                                                                                                                                                                                                                                                              |
| Manuscript ID                   | bmjopen-2022-062990.R1                                                                                                                                                                                                                                                                                                                                                                                                                                                                                                                                                                                                                                                                                                                                                       |
| Article Type:                   | Original research                                                                                                                                                                                                                                                                                                                                                                                                                                                                                                                                                                                                                                                                                                                                                            |
| Date Submitted by the Author:   | 25-May-2022                                                                                                                                                                                                                                                                                                                                                                                                                                                                                                                                                                                                                                                                                                                                                                  |
| Complete List of Authors:       | Jonduo, Marinjho; University of New South Wales Faculty of Medicine, Kirby Institute<br>Vallely, Lisa; University of New South Wales Faculty of Medicine, Kirby Institute<br>Wand, Handan; University of New South Wales Faculty of Medicine, Kirby Institute<br>Sweeney, Emma; The University of Queensland Centre for Clinical Research<br>Egli-Gany, Dianne; Universitat Bern Institut fur Sozial- und Praventivmedizin,<br>Kaldor, John; University of New South Wales Faculty of Medicine, Kirby Institute<br>Vallely, Andrew; University of New South Wales Faculty of Medicine, Kirby Institute,; Papua New Guinea Institute of Medical Research, Sexual and Reproductive Health Unit<br>Low, Nicola; University of Bern, Institute of Social and Preventive Medicine |
| <b>Primary Subject Heading</b>: | Obstetrics and gynaecology                                                                                                                                                                                                                                                                                                                                                                                                                                                                                                                                                                                                                                                                                                                                                   |
| Secondary Subject Heading:      | Sexual health, Public health, Infectious diseases, Epidemiology                                                                                                                                                                                                                                                                                                                                                                                                                                                                                                                                                                                                                                                                                                              |
| Keywords:                       | GYNAECOLOGY, MICROBIOLOGY, OBSTETRICS, EPIDEMIOLOGY, Epidemiology < INFECTIOUS DISEASES                                                                                                                                                                                                                                                                                                                                                                                                                                                                                                                                                                                                                                                                                      |
|                                 |                                                                                                                                                                                                                                                                                                                                                                                                                                                                                                                                                                                                                                                                                                                                                                              |

SCHOLARONE™  
Manuscripts



I, the Submitting Author has the right to grant and does grant on behalf of all authors of the Work (as defined in the below author licence), an exclusive licence and/or a non-exclusive licence for contributions from authors who are: i) UK Crown employees; ii) where BMJ has agreed a CC-BY licence shall apply, and/or iii) in accordance with the terms applicable for US Federal Government officers or employees acting as part of their official duties; on a worldwide, perpetual, irrevocable, royalty-free basis to BMJ Publishing Group Ltd ("BMJ") its licensees and where the relevant Journal is co-owned by BMJ to the co-owners of the Journal, to publish the Work in this journal and any other BMJ products and to exploit all rights, as set out in our [licence](#).

The Submitting Author accepts and understands that any supply made under these terms is made by BMJ to the Submitting Author unless you are acting as an employee on behalf of your employer or a postgraduate student of an affiliated institution which is paying any applicable article publishing charge ("APC") for Open Access articles. Where the Submitting Author wishes to make the Work available on an Open Access basis (and intends to pay the relevant APC), the terms of reuse of such Open Access shall be governed by a Creative Commons licence – details of these licences and which [Creative Commons](#) licence will apply to this Work are set out in our licence referred to above.

Other than as permitted in any relevant BMJ Author's Self Archiving Policies, I confirm this Work has not been accepted for publication elsewhere, is not being considered for publication elsewhere and does not duplicate material already published. I confirm all authors consent to publication of this Work and authorise the granting of this licence.

1  
2  
3 1 **Adverse pregnancy and birth outcomes associated with *Mycoplasma hominis*, *Ureaplasma***  
4  
5 2 ***urealyticum* and *Ureaplasma parvum*: A systematic review and meta-analysis**  
6

7 3  
8  
9 4 **Corresponding author:** Prof. N Low, MD MSc FFPH, Institute of Social and Preventive  
10  
11 5 Medicine, Mittelstrasse 43, University of Bern, CH-3012 Bern, Switzerland. Tel: +41 30 684 30  
12  
13 6 92; Email: [nicola.low@ispm.unibe.ch](mailto:nicola.low@ispm.unibe.ch). ORCID 0000-0003-4817-8986  
14  
15

16 7  
17  
18 8 Marinjho Emely Jonduo,<sup>1</sup> Lisa Michelle Valley,<sup>1,2</sup> Handan Wand,<sup>3</sup> Emma Louise Sweeney,<sup>4</sup>  
19  
20 9 Dianne Egli-Gany,<sup>5</sup> John Martin Kaldor,<sup>1</sup> Andrew John Valley<sup>1,2</sup> and Nicola Low,<sup>5</sup>  
21  
22

23 10  
24  
25 11 <sup>1</sup> Public Health Interventions Research Program, The Kirby Institute, University of New South  
26  
27 12 Wales, Sydney, NSW 2052, Australia.  
28  
29

30 13 <sup>2</sup> Sexual and Reproductive Health Unit, Papua New Guinea Institute of Medical Research,  
31  
32 14 Goroka, Eastern Highlands Province 441, Papua New Guinea.  
33

34 15 <sup>3</sup> Biostatistics and Databases program, The Kirby Institute, University of New South Wales,  
35  
36 16 Sydney, New South Wales, Australia.  
37  
38

39 17 <sup>4</sup> The University of Queensland Center for Clinical Research, Brisbane, Queensland 4029,  
40  
41 18 Australia.  
42

43 19 <sup>5</sup> Institute of Social and Preventive Medicine, University of Bern, CH-3012 Bern, Switzerland.  
44  
45

46 20  
47  
48 21 **Conflict of interest:** The authors report no conflict of interest.  
49

50 22 **Study funding:** Australian National Health & Medical Research Council (NHMRC);  
51  
52 23 DFID/MRC/Wellcome Trust Joint Global Health Trials; Swiss National Science Foundation.  
53  
54

55 24  
56  
57  
58  
59  
60

1  
2 25 **ABSTRACT**

3  
4 26 **Objectives**

5  
6  
7 27 *Mycoplasma hominis*, *Ureaplasma urealyticum* and *Ureaplasma parvum* (genital mycoplasmas)  
8  
9 28 commonly colonise the urogenital tract in pregnant women. This systematic review aims to  
10  
11 29 investigate their role in adverse pregnancy and birth outcomes, alone or in combination with  
12  
13  
14 30 bacterial vaginosis (BV).

15  
16 31 **Methods:** We searched Embase, Medline and CINAHL databases from January 1971 to February  
17  
18 32 2021. Eligible studies tested for any of the three genital mycoplasmas during pregnancy and  
19  
20 33 reported on the primary outcome, preterm birth (PTB) and/or secondary outcomes low birth  
21  
22 34 weight (LBW), premature rupture of membranes (PROM), spontaneous abortion (SA) and/or  
23  
24 35 perinatal death (PND).

25  
26  
27 36 Two reviewers independently screened titles and abstracts, read potentially eligible full texts and  
28  
29 37 extracted data. Two reviewers independently assessed risks of bias using published checklists.  
30  
31 38 Random effects meta-analysis was used to estimate summary odds ratios (OR, with 95%  
32  
33 39 confidence intervals, and prediction intervals). Multivariable and stratified analyses were  
34  
35 40 synthesised descriptively.

36  
37  
38  
39 41 **Results**

40  
41  
42 42 Of 57/1194 included studies, 39 were from high-income countries. In meta-analysis of unadjusted  
43  
44 43 ORs, *M. hominis* was associated with PTB (OR 1.87, 95% CI 1.49, 2.34), PROM, LBW and PND  
45  
46 44 but not SA. *U. urealyticum* was associated with PTB (OR 1.84, 95% CI 1.34, 2.55), PROM,  
47  
48 45 LBW, SA and PND. *U. parvum* was associated with PTB (1.60, 95% CI 1.12, 2.30), PROM and  
49  
50 46 SA. Nine of 57 studies reported any multivariable analysis. In two studies, analyses stratified by  
51  
52 47 BV status showed that *M. hominis* and *U. parvum* were more strongly associated with PTB in the  
53  
54 48 presence than in the absence of BV. The most frequent source of bias was a failure to control for  
55  
56 49 confounding.  
57  
58  
59  
60

1  
2  
3  
4  
50 **Conclusions**

51 The currently available literature does not allow conclusions about the role of mycoplasmas in  
52 adverse pregnancy and birth outcomes, alone or with co-existing BV. Future studies that consider  
53 genital mycoplasmas in the context of the vaginal microbiome are needed.

54 **PROSPERO published date:** 01 Nov 2018; **registration number:** CRD42016050962

55 **Strengths and limitations**

- 56 • We followed a published protocol with predefined outcomes and statistical analysis plan  
57 • Two reviewers independently selected the studies, extracted data and performed risk of bias  
58 assessment  
59 • Evidence for heterogeneity was examined and described both visually and statistically  
60 • We triangulated findings across study designs  
61 • Restriction to studies in English and German might have missed eligible articles.  
62

## 63 INTRODUCTION

64 *Mycoplasma hominis*, *Ureaplasma parvum* and *Ureaplasma urealyticum*, referred to together as  
65 genital mycoplasmas, commonly colonise the urogenital tract in women, and are often found  
66 together.[1, 2] These species do not appear to cause symptoms or harmful effects in nonpregnant  
67 women.[2, 3] Plummer et al. found that *M. hominis* was associated with abnormal vaginal  
68 discharge only in nonpregnant women who also had bacterial vaginosis (BV).[2] Colonisation  
69 with a genital mycoplasma has, however, been reported in many studies to be associated with  
70 several adverse pregnancy outcomes[4, 5] including preterm birth (PTB); low birth weight  
71 (LBW); premature rupture of membranes (PROM) and preterm premature rupture of the  
72 membranes (PPROM), spontaneous abortion (SA), and perinatal death (PND).[1, 6-12] Several  
73 research groups have suggested that *M. hominis*, whilst considered a part of the normal vaginal  
74 microbiota, might only be pathogenic in the presence of BV as part of a disturbed vaginal  
75 microbiota.[4, 5, 13] There are, however, inconsistencies across studies, uncertainty about the  
76 interplay between specific organisms and the vaginal microbiota in general,[14-16] and  
77 differences in recommendations for testing and treatment.[13, 17]

78 Technological advances in the molecular detection of multiple vaginal and endocervical  
79 organisms in the same assay[18, 19] should make it easier to study the role of genital  
80 mycoplasmas in adverse pregnancy outcomes. Methods to distinguish between *U. urealyticum*  
81 and *U. parvum* were not widely available before 2000,[20, 21] and unspiciated *Ureaplasma* spp.  
82 detected by culture were reported together as *U. urealyticum*.[18] Narrative reviews have not  
83 fully elucidated whether the apparent pathogenicity of genital mycoplasmas in pregnancy is  
84 associated with a particular organism, concurrent infection with multiple genital mycoplasmas  
85 and other lower genital tract organisms, or confounding by other demographic, clinical and  
86 behavioural factors.[4, 5, 13] A systematic and quantitative assessment of these questions is  
87 therefore timely.

## 88 OBJECTIVES

89 The primary objective of this study was to investigate the associations between *M. hominis*,  
90 *U. urealyticum* and/or *U. parvum* and the risk of PTB, alone and in combination with BV.

91 Secondary objectives were to investigate associations between each genital mycoplasma and  
92 LBW, PROM, SA and PND.

## 93 METHODS

94 This systematic review followed a registered protocol (PROSPERO CRD42016050962),[22]  
95 which covers multiple organisms, for which findings are reported elsewhere, including *Neisseria*  
96 *gonorrhoeae*[23] and *M. genitalium*. [24] We report our findings using the Preferred Reporting  
97 Items for Systematic Reviews and Meta-Analyses (PRISMA 2020) (A.1)[25] and methodological  
98 guidance about systematic reviews of observational studies (MOOSE) (A.2).[26] Patients or the  
99 public were not involved in the design, or conduct, or reporting, or dissemination plans of our  
100 research.

### 101 Eligibility criteria, information sources and search strategy

102 Studies were eligible if they reported on pregnant women with and without *M. hominis*, *U.*  
103 *urealyticum* and/or *U. parvum* and included one or more of the outcomes: PTB, LBW, PROM  
104 (preterm or term), SA and PND. Standard definitions were used for all outcomes (PTB, delivery  
105 at <37 weeks gestation; LBW, birthweight <2.5kg; PROM, rupture of membranes prior to onset  
106 of labour; PPROM, premature rupture at <37 weeks gestation; SA, delivery at <20 weeks  
107 gestation; stillbirth (death after >20 weeks in utero); perinatal or neonatal death (PND, stillbirths  
108 and death <28 days after birth), but we used author's definitions if necessary.[22] We excluded  
109 articles published before 2000 if they reported unspiciated *U. urealyticum* alone. If they reported  
110 on *M. hominis* and *U. urealyticum* we included the study but did not extract results about

1  
2 111 *U. urealyticum*. We included cohort, cross-sectional and case-control studies, and randomised  
3  
4  
5 112 controlled trials.

6  
7  
8 113 A member of the team (MJ) searched Medline, Embase, Cumulative Index to Nursing and Allied  
9  
10 114 Health Literature (CINAHL) for literature published from January 1971 to February 2021. We  
11  
12 115 searched reference lists of included studies for additional potentially eligible studies but did not  
13  
14 116 search grey literature sources. The searches did not include language restrictions, but we only  
15  
16 117 read the full-text of articles in English and German (languages spoken by the review team). The  
17  
18 118 full search strategy is in the online supporting information (A.3). We used Endnote (V7,  
19  
20 119 Thomson Reuters) to import, de-duplicate and manage retrieved records.

## 23 24 25 120 **Study selection and data extraction**

26  
27  
28 121 Two reviewers (MJ, LV) independently screened titles and abstracts, and read the full text of  
29  
30 122 potentially eligible papers. Disparities were resolved by discussion or by a third reviewer (DEG).  
31  
32 123 Where multiple reports presented data from the same study population, we identified a primary  
33  
34 124 record with the most detailed information but included data from other publications. Two  
35  
36 125 reviewers (MJ, LV) extracted data independently into an online database (Research Electronic  
37  
38 126 Data Capture, REDCap, Vanderbilt University, Tennessee). Disparities were resolved by  
39  
40 127 discussion or by a third reviewer (DEG, NL or ES).

## 41 42 43 44 45 128 **Data extraction**

46  
47  
48 129 Each reviewer extracted data about the study design, study setting and sociodemographic  
49  
50 130 characteristics, specimen type and timing, laboratory tests, organisms tested for, outcomes  
51  
52 131 reported, raw numbers of participants with and without each outcome and organism, where  
53  
54 132 available, or author reported effect size and 95% confidence intervals (CI). They extracted the  
55  
56 133 adjusted odds ratio (aOR, 95% CI) and recorded variables included in multivariable models,  
57  
58  
59 134 where possible. If results were described for more than one anatomical site, we used the



1  
2 135 following order of preference: vaginal or cervical swabs, amniotic fluid, placenta, urine, blood.

3  
4 136 Where more than one diagnostic method, we used data from nucleic acid amplification test

5  
6  
7 137 (NAAT), then bacterial culture, followed by ELISA. The data underlying this article are available

8  
9 138 in the article and in its online supplementary material.

### 12 139 **Risk of bias assessments**

14  
15 140 Two reviewers (MJ, LV) appraised each article independently, using checklists published by the

16  
17 141 UK National Institute for Health and Care Excellence (NICE).[27, 28] A qualitative judgement

18  
19 142 about internal and external validity was summarised as: all or most checklist criteria fulfilled

20  
21 143 (++), some criteria fulfilled (+), or few or no criteria fulfilled (-). We used funnel plots and the

22  
23 144 Egger test[29] to investigate evidence for publication or small study biases across studies for

24  
25 145 outcomes reported by more than nine studies.

### 28 29 30 146 **Data synthesis**

31  
32  
33 147 We used Stata 14.0 (StataCorp, College Station, TX) for all analyses. We used the OR, with 95%

34  
35 148 CI as the measure of association for all study designs, since the OR and risk ratio are similar for

36  
37 149 rare outcomes, as is the case for most of the outcomes of interest. This allowed us to analyse

38  
39 150 findings from different study designs together, where appropriate.[30] We constructed 2x2 tables

40  
41 151 to calculate of the OR or used the authors' calculation when raw data were unavailable. We

42  
43 152 added 0.5 to each cell in the table if there were zero observations in any cell. For each exposure-

44  
45 153 outcome pair, we examined forest plots of univariable associations visually, displaying the OR

46  
47 154 (with 95% CI) and the  $I^2$  statistic, to examine between study heterogeneity. We used a random

48  
49 155 effects model to estimate a summary OR (95% CI), which is the average effect across all

50  
51 156 included studies.[31] We stratified studies by study design in forest plots and, where the stratified

52  
53 157 estimates were compatible, we estimated the overall estimated OR with its 95% CI and a

54  
55 158 prediction interval, where there were three or more studies. The prediction interval takes into

56  
57 159 account all sources of between study variability to estimate a range of values- for the OR in a new

1  
2 160 study that is similar to the types of study included in the meta-analysis.[31] We then examined  
3  
4 161 evidence for from studies that also reported on BV. We described findings from analyses that  
5  
6 162 were stratified by BV status, or in studies with a multivariable analysis, we reported the aOR,  
7  
8  
9 163 controlling for BV and other measured confounding variables.[26]  
10  
11

## 12 164 **RESULTS**

### 15 165 **Study selection**

16 165  
17  
18 166 Our searches identified 1194 records and we screened 641, after exclusion of duplicates (Figure  
19  
20 167 S1). Of 215 full-text articles, we included 57 studies. Articles excluded based on title and abstract  
21  
22 168 mostly concerned neonatal respiratory outcomes, chorioamnionitis and infertility. Exclusion of  
23  
24 169 full-text articles had various reasons (Figure S1).  
25  
26  
27

### 28 170 **Study characteristics**

29 170  
30  
31 171 Of the 57 studies, we identified 42 reporting on *M. hominis* (proportion detected <1-70%), 31  
32  
33 172 reporting on *U. urealyticum* (proportion detected 0-91%) and 12 reporting on *U. parvum* (2–  
34  
35 173 100%) and median sample size 250, interquartile range, IQR 145-613, range 37 [32] to 9105 [33]  
36  
37 174 (Table 1, Supporting information Table S1). There were 26 cohort studies (Table S2.1),[1, 6, 8,  
38  
39 175 12, 15, 33-53] 25 case-control studies (Table S2.2)[7, 9-11, 32, 54-73] and six cross-sectional  
40  
41 176 studies (Table S2.3).[74-79] Most studies were from high-income settings (39/57) (Table S3.1,  
42  
43 177 S3.2, S3.3); ethnicity was reported in 24 studies, and maternal smoking in 12 (Table S4.1, S4.2,  
44  
45 178 S4.3). Most studies (54/57) stated the timing of specimen collection, and all described the  
46  
47 179 laboratory tests used (Table S1): 29/57 bacterial culture only; 24/57 NAAT only (Table 1, Table  
48  
49 180 S1). Three studies reported on antimicrobial susceptibilities[8, 50] with *M. hominis* resistant to  
50  
51 181 erythromycin, clarithromycin, tetracycline and *U. urealyticum* resistant to ciprofloxacin,  
52  
53 182 tetracycline and erythromycin.[6, 50]  
54  
55  
56  
57  
58  
59  
60

183 **Table 1.** Summary of characteristics of studies included in the systematic review

| Characteristic                    | Total          | <i>M. hominis</i> | <i>U. urealyticum</i> | <i>U. parvum</i> |
|-----------------------------------|----------------|-------------------|-----------------------|------------------|
| Number of studies, n*             | 57             | 42                | 31                    | 12               |
| Study design, n                   |                |                   |                       |                  |
| Cohort                            | 26             | 23                | 16                    | 9                |
| Case-control                      | 25             | 13                | 12                    | 1                |
| Cross-sectional                   | 6              | 6                 | 3                     | 2                |
| Number of women, total            | 36,992         | 28,697            | 16,609                | 9,663            |
| (median; IQR)                     | (250; 145-613) | (250; 159-759)    | (216; 145-613)        | (376; 195-986)   |
| Study setting, income category, n |                |                   |                       |                  |
| High income                       | 38             | 27                | 20                    | 10               |
| Upper-middle income               | 9              | 8                 | 4                     | 2                |
| Lower middle-income or low        | 3              | 2                 | 1                     | 0                |
| Not reported                      | 11             | 5                 | 6                     | 0                |
| Outcomes reported, n              |                |                   |                       |                  |
| Preterm birth                     | 43             | 29                | 27                    | 11               |
| Low birth weight                  | 8              | 6                 | 2                     | 1                |
| Premature ruptures of membrane    | 15             | 11                | 11                    | 2                |
| Spontaneous abortion              | 11             | 10                | 4                     | 2                |
| Perinatal death                   | 11             | 10                | 2                     | 1                |
| Specimen type, n <sup>†</sup>     |                |                   |                       |                  |
| Endocervical swab                 | 24             | 18                | 12                    | 4                |

|    |                                     |    |    |    |    |
|----|-------------------------------------|----|----|----|----|
| 1  |                                     |    |    |    |    |
| 2  | Vaginal swab                        | 15 | 10 | 11 | 5  |
| 3  |                                     |    |    |    |    |
| 4  | Urine                               | 1  | 1  | 0  | 0  |
| 5  |                                     |    |    |    |    |
| 6  | Amniotic fluid                      | 9  | 6  | 5  | 2  |
| 7  |                                     |    |    |    |    |
| 8  | Placental membrane                  | 8  | 7  | 3  | 2  |
| 9  | Diagnostic method*                  |    |    |    |    |
| 10 |                                     |    |    |    |    |
| 11 | NAAT                                | 24 | 13 | 20 | 10 |
| 12 |                                     |    |    |    |    |
| 13 | Culture                             | 29 | 27 | 7  | 0  |
| 14 |                                     |    |    |    |    |
| 15 | Culture and NAAT                    | 3  | 1  | 3  | 2  |
| 16 |                                     |    |    |    |    |
| 17 | Other**                             | 1  | 1  | 0  | 0  |
| 18 | Bacterial vaginosis assessed, n     | 10 | 8  | 3  | 1  |
| 19 |                                     |    |    |    |    |
| 20 | Reported presence of STI, n         | 20 | 14 | 8  | 3  |
| 21 |                                     |    |    |    |    |
| 22 | Reported on smoking status, n       | 13 | 7  | 6  | 4  |
| 23 |                                     |    |    |    |    |
| 24 | Reported on Multiple pregnancy, n*‡ |    |    |    |    |
| 25 | Excluded                            | 26 | 18 | 15 | 6  |
| 26 |                                     |    |    |    |    |
| 27 | Included                            | 8  | 5  | 4  | 3  |

For peer review only

184 **Abbreviations:** IQR, interquartile range; STI, sexually transmitted infection

185 \* The total number of studies included is 57. The totals for each organism sum to more than 57 because one study might have reported on more than  
186 one organism;

187 † One study used both urine and endocervical swab;

188 \*\*ELISA (with NAAT/ Culture)

189 ‡ 22 studies included women with multiple pregnancy

190

1  
2  
3 191 Of the 57 studies, 37 reported on a single microorganism (*M. hominis*, n=27; *U. urealyticum*,  
4  
5 192 n=10); 13 included two genital mycoplasmas (*M. hominis* and *U. urealyticum*, n=9; ureaplasmas,  
6  
7 193 n=4) and seven reported on all three organisms (Figure S2). Only two studies presented findings  
8  
9 194 for combinations of more than one genital mycoplasma; [6, 47] the rest presented data separately,  
10  
11 195 even if they had tested for more than one organism. Ten studies reported on the presence of  
12  
13 196 BV; [33, 36, 43, 47, 51, 53, 58, 59, 65, 72] we report the findings of these studies in the relevant  
14  
15 197 section of the results for each genital mycoplasma. Twenty-three studies reported on other  
16  
17 198 sexually transmitted infections (Table S4.1, S4.3, S4.3), including 2/23 reporting on syphilis,  
18  
19 199 5/23 gonorrhoea, 14/23 chlamydia, 5/23 *M. genitalium*, 5/23 trichomonas, and 2/23 HIV.  
20  
21  
22  
23  
24 200 Table 2 summarises the meta-analyses of each exposure-outcome pair and information about  
25  
26 201 genital mycoplasmas in the presence or absence of BV (Table S5). In most meta-analyses,  
27  
28 202 heterogeneity was low or moderate. Summary findings from different study designs were  
29  
30 203 compatible, so we present summary measures across all study designs (Figures 1, 2, and S2.1-  
31  
32 204 S2.3).  
33  
34  
35  
36  
37  
38  
39  
40  
41  
42  
43  
44  
45  
46  
47  
48  
49  
50  
51  
52  
53  
54  
55  
56  
57  
58  
59  
60

205 **Table 2** Summary estimates, by outcome and organism, from random effects meta-analysis of unadjusted odds ratios, for associations between  
 206 genital mycoplasmas and adverse birth outcomes, and summary of multivariable analyses that stratify the main association by BV status

| <b>Adverse outcome</b><br><i>Organism</i> | <b>No. of studies</b> | <b>Summary estimate*</b><br><b>OR (95% CI)</b> | <b>I<sup>2</sup>, %</b> | <b>Prediction interval</b> | <b>Any multivariable analysis†</b> | <b>Analyses of genital mycoplasmas and adverse birth outcomes in presence and absence of BV‡</b>                     |
|-------------------------------------------|-----------------------|------------------------------------------------|-------------------------|----------------------------|------------------------------------|----------------------------------------------------------------------------------------------------------------------|
| <b>Preterm birth</b>                      |                       |                                                |                         |                            |                                    |                                                                                                                      |
| <i>M. hominis</i>                         | 30                    | 1.87 (1.49, 2.34)                              | 29.2                    | 0.98, 3.55                 | 5 studies[1, 44, 45, 48, 61]       | MH+,BV+/PTB OR 1.58 (95% CI 0.94, 2.77); MH+,BV-/PTB 1.18 (0.91, 1.52)[33]                                           |
| <i>U. urealyticum</i>                     | 27                    | 1.84 (1.34, 2.55)                              | 69.2                    | 0.54, 6.36                 | 5 studies[1, 41, 47, 65, 74]       | UU+,BV+/PTB 0.47 (0.09, 3.31); UU+,BV-/PTB 1.15 (0.67, 1.98)[65]                                                     |
| <i>U. parvum</i>                          | 11                    | 1.60 (1.12, 2.30)                              | 58.4                    | 0.59, 4.36                 | 2 studies[1, 47]                   | UP-,BV-/PTB; UP+,BV-/PTB Adjusted 1.6 (1.2, 2.1); UP-,BV+/PTB aOR 1.6 (1.1, 2.3); UP+,BV+/PTB aOR 2.6 (1.7, 4.0)[47] |
| <b>Premature rupture of membrane</b>      |                       |                                                |                         |                            |                                    |                                                                                                                      |
| <i>M. hominis</i>                         | 11                    | 1.94 (1.43, 2.70)                              | 0.0                     | 1.33, 2.83                 | 1 study[61]                        | None reported                                                                                                        |
| <i>U. urealyticum</i>                     | 11                    | 4.27 (1.83, 9.98)                              | 87.3                    | 0.27, 68.07                | 0 studies                          |                                                                                                                      |
| <i>U. parvum</i>                          | 2                     | 3.19 (1.25, 8.15)                              | 0.0                     | NC                         | 0 studies                          |                                                                                                                      |
| <b>Low birth weight</b>                   |                       |                                                |                         |                            |                                    |                                                                                                                      |
| <i>M. hominis</i>                         | 6                     | 1.81 (1.29, 2.52)                              | 0.0                     | 1.12, 2.90                 | 1 study[34]                        | None reported                                                                                                        |
| <i>U. urealyticum</i>                     | 2                     | 2.24 (1.16, 4.33)                              | 0.0                     | NC                         | 0 studies                          |                                                                                                                      |
| <i>U. parvum</i>                          | 0                     | NA                                             | NA                      | NA                         | 0 studies                          |                                                                                                                      |
| <b>Spontaneous abortion</b>               |                       |                                                |                         |                            |                                    |                                                                                                                      |
| <i>M. hominis</i>                         | 10                    | 0.93 (0.44, 1.94)                              | 50.2                    | 0.12, 7.14                 | 0 studies                          | None reported                                                                                                        |

|                        |   |                    |      |             |               |
|------------------------|---|--------------------|------|-------------|---------------|
| <i>U. urealyticum</i>  | 4 | 1.74 (1.02, 2.95)  | 0.0  | 0.54, 5.58  | 0 studies     |
| <i>U. parvum</i>       | 2 | 1.65 (0.67, 4.05)  | 0.0  | NC          | 0 studies     |
| <b>Perinatal death</b> |   |                    |      |             | None reported |
| <i>M. hominis</i>      | 9 | 2.70 (1.31, 5.57)  | 30.4 | 0.52, 13.94 | 0 studies     |
| <i>U. urealyticum</i>  | 2 | 9.50 (2.99, 30.13) | 0.0  | NC          | 0 studies     |
| <i>U. parvum</i>       | 1 | NA                 |      |             | 0 studies     |

207 **Abbreviations:** aOR, adjusted odds ratio; BV, bacterial vaginosis; CI, confidence interval; I<sup>2</sup>, heterogeneity; MH, *Mycoplasma hominis*; NA, not

208 applicable; NC, could not be calculated; OR, odds ratio; UP, *Ureaplasma parvum*; UU, *Ureaplasma urealyticum*

209 \* Meta-analysis of unadjusted ORs, using random effects model

210 † Details for individual studies reported in Tables S4.1-4.3

211 ‡ Further details of analyses based on exclusion of other infections, stratification, or multivariable analyses in Table S5

212

## 213 **Risk of bias within and across studies**

214 Based on the NICE checklists,[27, 28] none of the 57 studies met all or most (++/++)  
215 checklist criteria for internal and external validity, 29 studies met some (+/+)[7, 9, 11, 15, 32,  
216 33, 36, 40, 41, 45-47, 50, 52, 56-58, 60, 62, 64, 65, 67-70, 72-74] and 17 met few or no  
217 checklist criteria (-/-)[6, 8, 10, 12, 38, 39, 42-44, 49, 53, 55, 61, 66, 71, 79] (Table S6.1, 6.2,  
218 6.3). Poor reporting of study methods meant that many items could not be assessed. In all  
219 study designs, control of confounding in most studies was poorly addressed or not addressed.  
220 Funnel plots for *M. hominis* (PTB, PROM, SA and PND), *U. urealyticum* (PTB, PROM) and  
221 *U. parvum* (PTB) did not show evidence of asymmetry (Table S7).

## 222 **Associations between *M. hominis* and adverse pregnancy outcomes**

223 There were 42 studies with data about *M. hominis*, reporting on 66 outcomes (Tables S2.1 -  
224 S2.3, S3.1). Of these, 30 included data about PTB.[1, 6, 8, 10, 15, 32, 33, 36, 38, 40, 42-46,  
225 48, 50-54, 58, 59, 61, 66, 68, 69, 72, 73, 75] *M. hominis* was associated with PTB in meta-  
226 analysis of unadjusted ORs (19,576 women, summary OR 1.87, 95% CI 1.49, 2.34; I<sup>2</sup> 29.2%;  
227 prediction interval 0.98, 3.55) (Figure 1). Five studies reporting a univariable association  
228 between *M. hominis* and PTB conducted multivariable analyses (Table 2, Table S5).[1, 44,  
229 45, 48, 61] The association was attenuated in one (aOR 1.1, 95% CI 0.5, 2.5), after  
230 controlling for obstetric factors (previous PTB, miscarriage, multiple pregnancy and cervical  
231 incompetence).[61] In two others, authors reported no association with PTB <37 weeks, but  
232 subgroup analyses showed associations with PTB <35 [1] or <33[48] weeks. In two studies,  
233 no numerical results were reported (Table S2.1). In seven studies, authors also reported on  
234 BV.[33, 36, 43, 51, 58, 59, 72] In one study, the associations between *M. hominis*, BV and  
235 PTB could be examined in detail.[33] *M. hominis*, in the absence of BV, was less strongly



1  
2  
3 236 associated with PTB (OR 1.18, 95% CI 0.91, 1.52) than in the presence of BV (OR 1.58, 95%  
4  
5 237 CI 0.94, 2.77).

6  
7  
8  
9 238 [Figure 1]

10  
11 239 Eleven studies included data about PROM.[6, 10, 40, 44, 45, 52, 61, 71, 73, 75, 79] *M.*

12  
13  
14 240 *hominis* was associated with PROM in meta-analysis of unadjusted ORs (4,303 women,

15  
16 241 summary OR 1.94, 95% CI 1.40, 2.70; I<sup>2</sup> 0.0 %; prediction interval 1.33, 2.83) (Figure S3.1).

17  
18 242 In one study with a multivariable analysis, the association was attenuated (aOR 1.1, 95% CI

19  
20 243 0.3, 3.7)[61]. Six studies included data about LBW.[8, 34, 35, 49, 75, 77] *M. hominis* was

21  
22 244 associated with LBW in meta-analysis of unadjusted ORs (2,394 new-borns, summary OR

23  
24 245 1.81, 95% CI 1.29, 2.52; I<sup>2</sup> 0.0 %; prediction interval 1.12, 2.90) (Figure S3.2). In one study,

25  
26 246 *M hominis* was associated with LBW in multivariable analysis, when considered as a

27  
28 247 continuous variable (reported p=0.01).[34] In 10 studies with data about PND,[8, 35, 40, 45,

29  
30 248 51, 54, 55, 76, 77] meta-analysis of unadjusted ORs found an association with *M. hominis*

31  
32 249 (3,696 women, summary OR 2.70, 95% CI 1.31, 4.54; I<sup>2</sup> 30.4%; prediction interval 0.52,

33  
34 250 13.94) (Figure S3.3). In 10 studies with data about SA,[6, 7, 11, 35, 36, 39, 40, 51, 55, 63]

35  
36 251 there was no association with *M. hominis* in meta-analysis of unadjusted ORs (4,531 women,

37  
38 252 summary OR 0.93, 95% CI 0.44, 1.49 ; I<sup>2</sup> 50.2%; prediction interval 0.12, 7.14) (Figure

39  
40 253 S3.4). No results of multivariable analyses were reported for PND or SA.

#### 41 42 254 **Associations between *U. urealyticum* and adverse pregnancy outcomes**

43  
44 255 Thirty-one studies included data about *U. urealyticum* and 46 outcomes (Tables S2.1 -S2.3,

45  
46 256 S3.2). There were 27 studies with data about PTB.[1, 6, 10, 12, 15, 32, 38, 40, 41, 46-48, 50,

47  
48 257 52, 53, 56, 57, 60, 62, 64, 65, 67, 70, 73-75, 78] In meta-analysis of unadjusted ORs, *U.*

49  
50 258 *urealyticum* was associated with PTB (12,234 women, summary OR 1.84, 95% CI 1.34, 2.55;

51  
52 259 I<sup>2</sup> 69.2%; prediction interval 0.54, 6.36) (Figure 2). Five studies reported multivariable

1  
2  
3 260 analyses (Table 2, Table S5).[1, 41, 47, 65, 74] In one, multivariable and univariable  
4  
5 261 associations were similar (aOR 1.4, 95% CI 0.8, 2.2).[47] In four, no numerical results were  
6  
7 262 reported.[1] In one study with information about BV, there was no strong evidence of an  
8  
9  
10 263 association between *U. urealyticum* and PTB in the presence (OR 0.47, 95% CI 0.09, 3.31) or  
11  
12 264 absence of BV (OR 1.15, 95% CI 0.67, 1.98).[65]

13  
14  
15 265 [Figure 2]

16  
17  
18 266 For all other outcomes, data were only available for meta-analysis of unadjusted ORs. *U.*  
19  
20 267 *urealyticum* was associated with: PROM in 12 studies[6, 10, 37, 50, 52, 60, 62, 67, 71, 73,  
21  
22 268 74, 79] (3,676 participants, summary OR 4.27, 95% CI 1.83, 9.98; I<sup>2</sup> 87.3%; prediction  
23  
24 269 interval 0.27, 68.07) (Figure S4.1); LBW in two studies[12, 65] (506 participants, OR  
25  
26 270 2.24, 95% CI 1.16, 4.33; I<sup>2</sup> 0.0%) (Figure S4.2); SA in four studies[6, 7, 9, 40] (2,140  
27  
28 271 women, summary OR 1.74, 95% CI 1.02, 2.95; I<sup>2</sup> 0.0%; prediction interval 0.54, 5.58)  
29  
30 272 (Figure S4.3); and PND in two studies[40, 60] (1,043 participants, summary OR 9.50, 95%  
31  
32 273 CI 2.99, 30.13; I<sup>2</sup> 0.0%) (Figure S4.4).

#### 33 34 35 36 37 274 **Associations between *U. parvum* and adverse pregnancy outcomes**

38  
39  
40  
41 275 Twelve studies included data about associations between *U. parvum* and 17 outcomes (Tables  
42  
43 276 S2.1 -S2.3, S3.1). Eleven studies reported PTB.[1, 10, 12, 15, 38, 40, 46, 47, 56, 64, 78] In  
44  
45 277 meta-analysis of unadjusted ORs, *U. parvum* was associated with PTB (8,002 women,  
46  
47 278 summary OR 1.60, 95% CI 1.12, 2.30; I<sup>2</sup> 58.4%; prediction interval 0.59, 4.36) (Figure 3). In  
48  
49 279 one study,[47] a multivariable analysis found a stronger association with PTB when both *U.*  
50  
51 280 *parvum* and BV were present (aOR 2.6, 95% CI 1.7, 4.0) than when *U. parvum* was present  
52  
53 281 without BV (aOR 1.6, 95% CI 1.2, 2.1), when compared with women with neither infection  
54  
55 282 (Table 2, Table S5). In one, no numerical results were reported.[1]

1  
2  
3 283 [Figure 3]  
4  
5

6 284 For all other outcomes, data were only available for meta-analysis of unadjusted ORs.

7  
8 285 *U. parvum* was associated with PROM in two studies[10, 40] (946 participants, OR 3.19,  
9 286 95% CI 1.25, 8.15; I<sup>2</sup> 0.0%) (Figure S5.1) and with SA in two studies[7, 40] (986 participant,  
10  
11 287 summary OR 1.65, 95% CI 0.67, 4.05; I<sup>2</sup> 0.0%) (Figure S5.2). One study reported on LBW  
12  
13 288 (22 participants, 1 event, OR 0.56, 95% CI 0.01, 12.75)[12] and one on PND (872 women, 1  
14  
15 289 event, OR 2.79).[40]  
16  
17  
18  
19

## 20 21 290 **DISCUSSION**

### 22 23 24 291 **Principal findings**

25  
26  
27 292 This systematic review and meta-analysis included 57 studies about associations between  
28  
29 293 *M. hominis*, *U. urealyticum* and *U. parvum* and five adverse pregnancy outcomes. Only 6/57  
30  
31 294 studies reported any multivariable analysis. In 51 studies, meta-analyses of unadjusted ORs  
32  
33 295 found that *M. hominis* was associated with an increase in PTB, PROM, LBW, and PND,  
34  
35 296 *U. urealyticum* with an increase in PTB, PROM, LBW, SA, and PND, and *U. parvum* with an  
36  
37 297 increase in PTB and PROM. In three studies from which data about both genital  
38  
39 298 mycoplasmas and BV could be extracted; *M. hominis* and *U. parvum* were less strongly  
40  
41 299 associated with PTB in the absence of BV than in the presence of BV and no association with  
42  
43 300 *U. urealyticum* was found in the presence or absence of BV.  
44  
45  
46  
47  
48

### 49 301 **Strengths and weaknesses of the study**

50  
51  
52 302 The strengths of this systematic review and meta-analysis are first, that we followed a  
53  
54 303 published protocol[22] with predefined outcomes and statistical analysis plan. Study  
55  
56 304 selection, data extraction and risk of bias assessment were undertaken independently by two  
57  
58 305 reviewers, to reduce subjectivity. Second, we examined evidence for heterogeneity visually  
59  
60

1  
2  
3 306 and statistically, and calculated prediction intervals that take into account the variability in  
4  
5 307 estimates from different studies and predict a range of values that could be expected in a new  
6  
7  
8 308 study.[31] In several of the random effects models, the  $I^2$  value was zero, suggesting that the  
9  
10 309 variability between the estimates is due to chance. This is consistent with meta-analyses in  
11  
12 310 which the sampling error is high and confidence intervals for estimates in individual studies  
13  
14 311 all overlap (e.g., Figure S3.1 and S3.2). Third, we triangulated findings across study  
15  
16 312 designs;[23, 26] despite the different potential sources of bias, the summary estimates were  
17  
18 313 compatible and we judged it reasonable to combine effect estimates.[30] There were also  
19  
20 314 limitations in the design of the review. Despite a predefined search strategy, with broad  
21  
22 315 search terms, we might have missed relevant studies, particularly by restriction to languages  
23  
24 316 not spoken fluently by the authors. There were too few studies to conduct all the planned  
25  
26 317 sensitivity analyses by organism, but we described all studies that allowed stratification by  
27  
28 318 BV status.  
29  
30  
31  
32  
33

### 34 319 **Comparison with existing literature and interpretation**

35  
36  
37 320 We found a systematic review about genital mycoplasmas that included studies published in  
38  
39 321 English or Chinese up to March 2020.[80] The focus of the review was on infertility,  
40  
41 322 however, and limited search terms for studies about adverse pregnancy outcomes identified  
42  
43 323 only 11 of the 57 studies that we included, making comparison difficult.  
44  
45  
46

47 324 The findings from this systematic review cannot be interpreted as showing causal  
48  
49 325 associations between colonisation with *M. hominis*, *U. urealyticum*, or *U. parvum* in  
50  
51 326 pregnancy and some adverse pregnancy outcomes. We found associations in meta-analysis of  
52  
53 327 unadjusted associations, but the confounder adjusted estimates could not be summarised.  
54  
55 328 Most studies in this systematic review did not control for confounding by either  
56  
57 329 sociodemographic characteristics, or co-infection with another organism or BV. We could not  
58  
59  
60

1  
2  
3 330 elucidate the role of co-infection with BV,[4, 5] because there were only two relevant studies,  
4  
5 331 with imprecise estimates. Rittenschober-Böhm *et al.*, studied more than 4000 women in  
6  
7 332 Germany.[47] They found univariable associations between both *U. parvum* (OR 1.7, 95% CI  
8  
9 333 1.3, 2.2) and *U. urealyticum* (1.4, 95% CI 0.9, 2.3) and spontaneous PTB. A strength of their  
10  
11 334 study is the multivariable analysis, controlling for age, smoking, history of PTB and other  
12  
13 335 infections. For *U. parvum*, the association with PTB was stronger when both BV and *U.*  
14  
15 336 *parvum* were present than for *U. parvum* alone. The authors did not analyse the association  
16  
17 337 with *U. urealyticum* further. Hillier *et al.*, investigated the association between *M. hominis*  
18  
19 338 and PTB of LBW infants in more than 10,000 women in the USA.[33] The association was  
20  
21 339 stronger in the presence (1.58, 95% CI 0.94, 2.77) than absence (1.18, 95% CI 0.91, 1.52) of  
22  
23 340 BV, but confidence intervals for both estimates include the null value. Hillier *et al.* also  
24  
25 341 reported a stronger association with PTB when *M. hominis* was present with Bacteroides and  
26  
27 342 BV (OR 2.1, 95% CI 1.5, 3.0). The authors did not, however, control for any other  
28  
29 343 confounding factors.

30  
31 344 Several of the limitations that we found in our review apply to systematic reviews of  
32  
33 345 observational studies in general. Most included studies did not set out to study our review  
34  
35 346 question and have small sample sizes. We extracted most data about genital mycoplasmas,  
36  
37 347 our exposures of interest, from tables of covariates. Differences in the performance  
38  
39 348 characteristics of diagnostic methods might have resulted in misclassification of infection  
40  
41 349 status. Bacteriological culture has been considered the gold standard for the identification of  
42  
43 350 genital mycoplasmas, but problems can arise from their fastidious growth requirements and a  
44  
45 351 lack of reliable media. Commercialised kits for both culture and NAAT diagnosis are less  
46  
47 352 laborious and have greater sensitivity and specificity compared with earlier in-house  
48  
49 353 approaches.[81, 82] Sample integrity is also important and greatly influenced by sample  
50  
51 354 collection methods (e.g. type of swab, transport medium), transportation (e.g. cold chain  
52  
53  
54  
55  
56  
57  
58  
59  
60

1  
2  
3 355 maintenance) and storage (e.g. duration and temperature at which kept in long-term storage).  
4

5 356 It was not possible to account for differences in anatomical sampling site that may have  
6  
7 357 affected detection in individual studies, e.g. *M. hominis* is more commonly isolated in the  
8  
9  
10 358 lower genital tract whilst *Ureaplasma* spp. colonise the upper genital tract.[83] Other  
11  
12 359 limitations include misclassification, for example, gestational age was assessed by obstetric  
13  
14 360 ultrasound in only one third of studies and inconsistency in the timing during pregnancy of  
15  
16 361 sampling for genital mycoplasmas.

17  
18  
19  
20 362 The specificity of associations between different genital mycoplasmas and adverse  
21  
22 363 pregnancy, and their mechanisms of action, remain unclear. Several studies included in this  
23  
24 364 review postulate that subclinical ascending *Ureaplasma* spp. to the choriodecidual space is  
25  
26 365 followed by placental transfer into the amniotic cavity,[7, 76, 78, 84, 85] which then leads to  
27  
28 366 PROM, SA, and PND in women with high bacterial load in the upper genital tract.[85, 86]

29  
30 367 The presence of genital mycoplasmas in the placental membranes and amniotic fluid might  
31  
32 368 have a direct effect, but they also increase levels of a variety of cytokines and other  
33  
34 369 inflammatory mediators, which might be the key drivers of adverse pregnancy outcomes.[32,  
35  
36 370 37, 52, 64, 67, 85, 87] Gene sequencing methods show the complexity and diversity of the  
37  
38 371 vaginal microbiota during pregnancy [15, 16, 88] and genital mycoplasmas are often among  
39  
40 372 the most plentiful of the many bacterial species identified. In our review, one study using 16S  
41  
42 373 rRNA sequencing found a group of bacteria, including *U. parvum*, that was associated with  
43  
44 374 PTB,[15] but another smaller study did not.[56] Analysis of associations between microbial  
45  
46 375 communities and PTB was beyond the scope of our systematic review. A better  
47  
48 376 understanding of antimicrobial susceptibility is also needed. Genital mycoplasmas lack a  
49  
50 377 rigid cell wall, which allows them to evade some antibiotics. Beta-lactam antibiotics and  
51  
52 378 vancomycin are considered ineffective but macrolides, fluoroquinolones and tetracyclines are  
53  
54 379 often effective.[89] In pregnant women, only macrolides should be used[90] but high rates of  
55  
56  
57  
58  
59  
60

1  
2  
3 380 antibiotic resistance are reported in many settings,[4, 91, 92] and in the absence of definitive  
4  
5 381 evidence of the benefits of treatment, cannot currently be recommended.  
6  
7

## 8 382 **Implications**

10  
11 383 The findings of this systematic review show key areas for future research. First, there is a  
12  
13 384 need for epidemiological studies that are designed specifically to investigate the  
14  
15 385 pathogenicity of vaginal and cervical organisms alone and in the context of the vaginal  
16  
17 386 microbiome. A holistic approach that includes gene sequencing and other molecular and  
18  
19 387 culture methods to detect other endogenous and sexually transmitted organisms is  
20  
21 388 required,[14-16] taking into account the need for consistent strategies for specimen collection  
22  
23 389 both in terms of the trimester(s) and the timing and types of specimens collected. These  
24  
25 390 studies should also define potential causal pathways and address confounding from factors  
26  
27 391 such as maternal age, smoking, obstetric history, co-infections and comorbidities. Second,  
28  
29 392 there is a critical need to conduct research in low- and middle-income settings where the  
30  
31 393 prevalence of sexually transmitted infections, BV and genital mycoplasma are high, and the  
32  
33 394 burden of adverse pregnancy outcomes greatest. If consistent and reproducible associations  
34  
35 395 are found in observational studies, potential interventions need to be evaluated. Randomised  
36  
37 396 controlled trials of screening and treatment for a range of vaginal and endocervical infections  
38  
39 397 in pregnancy are underway.[93, 94] If these interventions prevent adverse pregnancy  
40  
41 398 outcomes, further research will still be needed to understand the contributions of specific  
42  
43 399 organisms or combinations thereof. Multiplex assays will facilitate these research studies but  
44  
45 400 should not be used in routine clinical practice because of the risks of overdiagnosis and  
46  
47 401 overtreatment.[18, 19]  
48  
49  
50  
51  
52  
53  
54  
55  
56  
57  
58  
59  
60

1  
2  
3 402 **Conclusions**  
4  
5

6 403 In this systematic review and meta-analysis, we found that genital mycoplasmas are  
7  
8 404 associated with several different adverse pregnancy outcomes in univariable analysis only.  
9

10 405 The currently available literature does not allow conclusions about the role of mycoplasmas  
11  
12 406 in adverse pregnancy and birth outcomes, alone or with co-existing bacterial vaginosis.  
13

14 407 Future studies that consider genital mycoplasmas in the context of the vaginal microbiome  
15  
16 408 are needed.  
17  
18  
19

20  
21 409 **Authors' roles**  
22

23  
24 410 DEG, NL, AV, LV conceived the idea for the review and DEG, JK, NL, AV, LV, HW wrote  
25  
26 411 the protocol. MJ and LV did the searches, screened, and selected studies and extracted data.  
27

28 412 DEG, NL, ES resolved disagreements. NL and HW did statistical analyses. MJ wrote the first  
29  
30 413 draft of the manuscript. MJ, NL did review and editing. All authors commented on revisions  
31  
32 414 of the manuscript and accept responsibility for its content.  
33  
34  
35

36 415 **Funding**  
37

38  
39  
40 416 NL receives funding from the Swiss National Science Foundation, project numbers 197831,  
41

42 417 160909; LV is supported by an Australian National Health & Medical Research Council  
43

44 418 (NHMRC) Early Career Fellowship Grant (2018-2021); MJ is a PhD research student is  
45

46 419 supported through the Women And Newborns Trial of Antenatal Interventions and  
47

48 420 Management (WANTAIM) trial (ISRCTN No: ISRCTN37134032), funded by  
49

50 421 DFID/MRC/Wellcome Trust Joint Global Health Trials, Australian NHMRC Grant and  
51

52 422 Swiss National Science Foundation. DEG received salary support from r4d programme  
53

54 423 (Swiss Programme for Research on Global Issues for Development), grant number IZ07Z0-  
55  
56  
57  
58  
59  
60



1  
2  
3 424 160909. AV receives salary support from the Australian NHMRC, through a Career  
4  
5 425 Development Fellowship.  
6  
7

8  
9 426 **Ethics, Patient and Public Involvement**

10  
11 427 This study does not involve huma participants or animal subjects. All data used are only from  
12  
13 428 published data. Patients or the public were not involved in the design, or conduct, or  
14  
15 429 reporting, or dissemination plans of our research.  
16  
17

18  
19 430 **Data availability**

20  
21  
22 431 No additional or unpublished data available.  
23  
24

25  
26 432 **Conflict of interests**

27  
28  
29 433 NL is on the advisory board of Sefunda AG, a start-up company that develops point-of-care  
30  
31 434 tests for sexually transmitted infections.  
32  
33

34  
35 435  
36  
37  
38  
39  
40  
41  
42  
43  
44  
45  
46  
47  
48  
49  
50  
51  
52  
53  
54  
55  
56  
57  
58  
59  
60

436 **REFERENCES**

- 437 1. Agger WA, Siddiqui D, Lovrich SD, et al. Epidemiologic factors and urogenital infections  
438 associated with preterm birth in a midwestern U.S. population. *Obstet Gynecol*  
439 2014;124(5):969-77. doi: <https://dx.doi.org/10.1097/AOG.0000000000000470>
- 440 2. Plummer EL, Vodstrcil LA, Bodiya K, et al. Are Mycoplasma hominis, Ureaplasma  
441 urealyticum and Ureaplasma parvum Associated With Specific Genital Symptoms and  
442 Clinical Signs in Nonpregnant Women? *Clin Infect Dis* 2021
- 443 3. Horner P, Donders G, Cusini M, et al. Should we be testing for urogenital Mycoplasma  
444 hominis, Ureaplasma parvum and Ureaplasma urealyticum in men and women?—a position  
445 statement from the European STI Guidelines Editorial Board. *J Eur Acad Dermatol Venereol*  
446 2018;32(11):1845-51.
- 447 4. Capoccia R, Greub G, Baud D. Ureaplasma urealyticum, Mycoplasma hominis and  
448 adverse pregnancy outcomes. *Curr Opin Infect Dis* 2013;26(3):231-40. doi:  
449 10.1097/QCO.0b013e328360db58
- 450 5. Taylor-Robinson D, Lamont R. Mycoplasmas in pregnancy. *BJOG: Int J Obstet Gy*  
451 2011;118(2):164-74.
- 452 6. Lee MY, Kim MH, Lee WI, et al. Prevalence and Antibiotic Susceptibility of Mycoplasma  
453 hominis and Ureaplasma urealyticum in Pregnant Women. *Yonsei Med J* 2016;57(5):1271-5.  
454 doi: <https://dx.doi.org/10.3349/ymj.2016.57.5.1271>
- 455 7. Oliveira C, Oliveira M, Oliveira H, et al. Association of spontaneous abortion and  
456 Ureaplasma parvum detected in placental tissue. *Epidemiol Infect* 2020;148:e126. doi:  
457 10.1017/S0950268820001302 [published Online First: 2020/07/07]
- 458 8. Luton D, Ville Y, Luton-Sigy A, et al. Prevalence and influence of Mycoplasma hominis  
459 and Ureaplasma urealyticum in 218 African pregnant women and their infants. *Eur J Obstet*  
460 *Gynecol Reprod Biol* 1994;56(2):95-101.
- 461 9. Ahmadi A, Khodabandehloo M, Ramazanzadeh R, et al. Association between Ureaplasma  
462 urealyticum endocervical infection and spontaneous abortion in in Sanandaj, Iran. *Iran J*  
463 *Microbiol* 2014;6(6):392-97.

- 1  
2  
3 464 10. Jones HE, Harris KA, Azizia M, et al. Differing prevalence and diversity of bacterial  
4 465 species in fetal membranes from very preterm and term labor. *PLoS One* 2009;4 (12) (no  
5 466 pagination)(e8205) doi: <http://dx.doi.org/10.1371/journal.pone.0008205>  
6  
7  
8  
9 467 11. Farhadifar F, Khodabandehloo M, Ramazanzadeh R, et al. Survey on association between  
10 468 *Mycoplasma hominis* endocervical infection and spontaneous abortion using Polymerase  
11 Chain Reaction. *Int J Reprod Biomed* 2016;14(3):181-86.  
12  
13  
14  
15 470 12. Peretz A, Tameri O, Azrad M, et al. *Mycoplasma* and *Ureaplasma* carriage in pregnant  
16 471 women: the prevalence of transmission from mother to newborn. *BMC Pregnancy Childbirth*  
17 472 2020;20(1):456. doi: 10.1186/s12884-020-03147-9  
18  
19  
20  
21 473 13. Donders GG, Ruban K, Bellen G, et al. *Mycoplasma/Ureaplasma* infection in pregnancy:  
22 474 to screen or not to screen. *J Perinat Med* 2017;45(5):505-15. doi: 10.1515/jpm-2016-0111  
23  
24  
25  
26 475 14. van de Wijgert JH. The vaginal microbiome and sexually transmitted infections are  
27 476 interlinked: consequences for treatment and prevention. *PLoS Med* 2017;14(12):e1002478.  
28  
29  
30  
31 477 15. Payne MS, Newnham JP, Doherty DA, et al. A Specific Bacterial DNA Signature in the  
32 478 Vagina of Australian Women in Mid-Pregnancy Predicts High Risk of Spontaneous Preterm  
33 479 Birth (The Predict1000 Study). *Am J Obstet Gynecol* 2021 doi: 10.1016/j.ajog.2020.08.034  
34 [published Online First: 2020/08/31]  
35 480  
36  
37  
38 481 16. Pace RM, Chu DM, Prince AL, et al. Complex species and strain ecology of the vaginal  
39 482 microbiome from pregnancy to postpartum and association with preterm birth. *Med (N Y)*  
40 483 2021;2(9):1027-49. doi: 10.1016/j.medj.2021.06.001 [published Online First: 2021/10/08]  
41  
42  
43  
44 484 17. Vouga M, Greub G, Prod'hom G, et al. Treatment of genital mycoplasma in colonized  
45 485 pregnant women in late pregnancy is associated with a lower rate of premature labour and  
46 486 neonatal complications. *Clin Microbiol Infect* 2014;20(10):1074-79. doi:  
47  
48 487 <http://dx.doi.org/10.1111/1469-0691.12686>  
49  
50  
51  
52 488 18. Jensen JS. To Test or Not to Test for *Mycoplasma hominis* and *Ureaplasmas*: That's (Not)  
53 489 the Question. *Clin Infect Dis* 2021;73(4):669-71. doi: 10.1093/cid/ciab065 [published Online  
54 490 First: 2021/01/26]  
55  
56  
57  
58  
59  
60

- 1  
2  
3 491 19. Taylor-Robinson D, Horner P, Pallearos A. Diagnosis of some genital-tract infections:  
4 part 2. Molecular tests and the new challenges. *Int J STD AIDS* 2020;31(3):198-207. doi:  
5 492 10.1177/0956462419890526 [published Online First: 2020/02/06]  
6 493  
7  
8  
9 494 20. Kong F, Ma Z, James G, et al. Species identification and subtyping of *Ureaplasma*  
10 495 *parvum* and *Ureaplasma urealyticum* using PCR-based assays. *J Clin Microbiol*  
11 496 2000;38(3):1175-9.  
12  
13  
14  
15 497 21. Robertson JA, Stemke GW, Davis Jr JW, et al. Proposal of *Ureaplasma parvum* sp. nov.  
16 498 and emended description of *Ureaplasma urealyticum* (Shepard et al. 1974) Robertson et al.  
17 499 2001. *Int J Syst Evol Microbiol* 2002;52(2):587-97.  
18  
19  
20  
21 500 22. Vallely LM, Egli-Gany D, Pomat W, et al. Adverse pregnancy and neonatal outcomes  
22 501 associated with *Neisseria gonorrhoeae*, *Mycoplasma genitalium*, *M. hominis*, *Ureaplasma*  
23 502 *urealyticum* and *U. parvum*: a systematic review and meta-analysis protocol. *BMJ Open*  
24 503 2018;8(11)  
25  
26  
27  
28  
29 504 23. Vallely LM, Egli-Gany D, Wand H, et al. Adverse pregnancy and neonatal outcomes  
30 505 associated with *Neisseria gonorrhoeae*: systematic review and meta-analysis. *Sex Transm*  
31 506 *Infect* 2021;97(2):104-11.  
32  
33  
34  
35 507 24. Frenzer C, Egli-Gany D, Vallely LM, et al. Adverse pregnancy and neonatal outcomes  
36 508 associated with *Mycoplasma genitalium*: systematic review and meta-analysis [In Press]. *Sex*  
37 509 *Transm Infect* 2022;Epub ahead of print: doi: doi:10.1136/sextrans-2021-055352  
38  
39  
40  
41 510 25. Page MJ, McKenzie JE, Bossuyt PM, et al. The PRISMA 2020 statement: an updated  
42 511 guideline for reporting systematic reviews. *BMJ* 2021;372:n71. doi: 10.1136/bmj.n71  
43 512 [published Online First: 2021/03/31]  
44  
45  
46  
47 513 26. Dekkers OM, Vandenbroucke JP, Cevallos M, et al. COSMOS-E: guidance on  
48 514 conducting systematic reviews and meta-analyses of observational studies of etiology. *PLoS*  
49 515 *Med* 2019;16(2):e1002742.  
50  
51  
52  
53 516 27. National Institute for Health Care Excellence. The social care guidance manual. Great  
54 517 Britain: National Institute for Health and Care Excellence, 2016.  
55  
56  
57  
58  
59  
60

- 1  
2  
3 518 28. National Institute for Health Care Excellence. Methods for the development of NICE  
4 public health guidance. Great Britain: National Institute for Health and Care Excellence 2012.  
5 519  
6  
7  
8 520 29. Egger M, Davey SG, Schneider M, et al. Bias in meta-analysis detected by a simple,  
9 521 graphical test. *BMJ* 1997;315(7109):629-34.  
10  
11  
12 522 30. Low N. Chlamydia trachomatis and reproductive health: what can we learn from  
13 systematic reviews of observational studies? *Sex Transm Infect* 2020 doi: 10.1136/sextrans-  
14 523 2019-054279 [published Online First: 2020/01/29]  
15 524  
16  
17  
18 525 31. Riley RD, Higgins JP, Deeks JJ. Interpretation of random effects meta-analyses. *BMJ*  
19 526 2011;342:d549.  
20  
21  
22  
23 527 32. Daskalakis G, Thomakos N, Papapanagiotou A, et al. Amniotic fluid interleukin-18 at  
24 528 mid-trimester genetic amniocentesis: Relationship to intraamniotic microbial invasion and  
25 preterm delivery. *BJOG: Int J Obstet Gy* 2009;116(13):1743-48. doi:  
26 529 <http://dx.doi.org/10.1111/j.1471-0528.2009.02364.x>  
27 530  
28  
29  
30  
31 531 33. Hillier SL, Nugent RP, Eschenbach DA, et al. Association between bacterial vaginosis  
32 532 and preterm delivery of a low-birth-weight infant. *N Engl J Med* 1995;333(26):1737-42.  
33  
34  
35 533 34. Berman SM, Harrison HR, Boyce WT, et al. Low birth weight, prematurity, and  
36 534 postpartum endometritis. Association with prenatal cervical *Mycoplasma hominis* and  
37 535 *Chlamydia trachomatis* infections. *JAMA* 1987;257(9):1189-94. [published Online First:  
38 536 1987/03/06]  
39  
40  
41  
42  
43 537 35. Braun P, Lee YH, Klein JO, et al. Birth Weight and Genital Mycoplasmas in Pregnancy.  
44 538 *N Engl J Med* 1971;284(4):167-71. doi: 10.1056/NEJM197101282840401  
45  
46  
47  
48 539 36. Donders GG, Van Calsteren K, Bellen G, et al. Predictive value for preterm birth of  
49 540 abnormal vaginal flora, bacterial vaginosis and aerobic vaginitis during the first trimester of  
50 pregnancy. *BJOG: Int J Obstet Gy* 2009;116(10):1315-24. doi:  
51 541 <https://dx.doi.org/10.1111/j.1471-0528.2009.02237.x>  
52 542  
53  
54  
55 543 37. Gerber S, Vial Y, Hohlfeld P, et al. Detection of *Ureaplasma urealyticum* in second-  
56 544 trimester amniotic fluid by polymerase chain reaction correlates with subsequent preterm  
57 labor and delivery. *J Infect Dis* 2003;187(3):518-21. doi: <https://dx.doi.org/10.1086/368205>  
58 545  
59  
60

- 1  
2  
3 546 38. Govender S, Theron GB, Odendaal HJ, et al. Prevalence of genital mycoplasmas,  
4 547 ureaplasmas and chlamydia in pregnancy. *J Obstet Gynaecol* 2009;29(8):698-701. doi:  
5 548 10.3109/01443610903184033 [published Online First: 2009/10/14]  
6  
7  
8  
9 549 39. Harrison HR, Alexander ER, Weinstein L, et al. Cervical Chlamydia trachomatis and  
10 550 mycoplasmal infections in pregnancy. *Epidemiology and outcomes. JAMA*  
11 551 1983;250(13):1721-7. [published Online First: 1983/10/07]  
12  
13  
14  
15 552 40. Kataoka S, Yamada T, Chou K, et al. Association between preterm birth and vaginal  
16 553 colonization by mycoplasmas in early pregnancy. *J Clin Microbiol* 2006;44(1):51-5. doi:  
17 554 <https://dx.doi.org/10.1128/JCM.44.1.51-55.2006>  
18  
19  
20  
21 555 41. Koucky M, Malickova K, Cindrova-Davies T, et al. Prolonged progesterone  
22 556 administration is associated with less frequent cervicovaginal colonization by *Ureaplasma*  
23 557 *urealyticum* during pregnancy - Results of a pilot study. *J Reprod Immunol* 2016;116:35-41.  
24 558 doi: <http://dx.doi.org/10.1016/j.jri.2016.04.285>  
25  
26  
27  
28  
29 559 42. McDonald HM, O'Loughlin JA, Jolley PT, et al. Changes in vaginal flora during  
30 560 pregnancy and association with preterm birth. *J Infect Dis* 1994;170(3):724-8.  
31  
32  
33  
34 561 43. Menard JP, Mazouni C, Salem-Cherif I, et al. High vaginal concentrations of *atopobium*  
35 562 *vaginae* and *gardnerella vaginalis* in women undergoing preterm labor. *Obstet Gynecol*  
36 563 2010;115(1):134-40. doi: <http://dx.doi.org/10.1097/AOG.0b013e3181c391d7>  
37  
38  
39  
40 564 44. Minkoff H, Grunebaum AN, Schwarz RH. Risk factors for prematurity and premature  
41 565 rupture of membranes: A prospective study of the vaginal flora in pregnancy. *Am J Obstet*  
42 566 *Gynecol* 1984;150(8):965-72.  
43  
44  
45  
46 567 45. Nguyen DP, Gerber S, Hohlfeld P, et al. *Mycoplasma hominis* in mid-trimester amniotic  
47 568 fluid: relation to pregnancy outcome. *J Perinat Med* 2004;32(4):323-6. doi:  
48 569 10.1515/JPM.2004.060 [published Online First: 2004/09/07]  
49  
50  
51  
52 570 46. Payne MS, Ireland DJ, Watts R, et al. *Ureaplasma parvum* genotype, combined vaginal  
53 571 colonisation with *Candida albicans*, and spontaneous preterm birth in an Australian cohort of  
54 572 pregnant women. *BMC Pregnancy Childbirth* 2016;16:312-12.  
55  
56  
57  
58  
59  
60

- 1  
2  
3 573 47. Rittenschober-Böhm J, Waldhoer T, Schulz SM, et al. First Trimester Vaginal  
4  
5 574 Ureaplasma Biovar Colonization and Preterm Birth: Results of a Prospective Multicenter  
6  
7 575 Study. *Neonatology* 2018;113(1):1-6. doi: <http://dx.doi.org/10.1159/000480065> [published  
8  
9 576 Online First: 2017/09/22]
- 10  
11 577 48. Usui R, Ohkuchi A, Matsubara S, et al. Vaginal lactobacilli and preterm birth. *J Perinat*  
12  
13 578 *Med* 2002;30(6):458-66. doi: 10.1515/JPM.2002.072 [published Online First: 2003/01/18]
- 14  
15 579 49. Sperling RS, Newton E, Gibbs RS. Intraamniotic Infection in Low-Birth-Weight Infants.  
16  
17 580 *J Infect Dis* 1988;157(1):113-17.
- 18  
19  
20 581 50. Kwak DW, Hwang HS, Kwon JY, et al. Co-infection with vaginal Ureaplasma  
21  
22 582 urealyticum and Mycoplasma hominis increases adverse pregnancy outcomes in patients with  
23  
24 583 preterm labor or preterm premature rupture of membranes. *J Matern -Fetal Neonatal Med*  
25  
26 584 2014;27(4):333-7. doi: <https://dx.doi.org/10.3109/14767058.2013.818124>
- 27  
28 585 51. Odendaal HJ, Popov I, Schoeman J, et al. Preterm labour--is Mycoplasma hominis  
29  
30 586 involved? *S Afr Med J* 2002;92(3):235-7. [published Online First: 2002/06/04]
- 31  
32 587 52. Perni SC, Vardhana S, Korneeva I, et al. Mycoplasma hominis and Ureaplasma  
33  
34 588 urealyticum in midtrimester amniotic fluid: association with amniotic fluid cytokine levels  
35  
36 589 and pregnancy outcome. *Am J Obstet Gynecol* 2004;191(4):1382-6. doi:  
37  
38 590 10.1016/j.ajog.2004.05.070 [published Online First: 2004/10/28]
- 39  
40 591 53. Schwab FD, Zettler EK, Moh A, et al. Predictive factors for preterm delivery under rural  
41  
42 592 conditions in post-tsunami Banda Aceh. *J Perinat Med* 2015;44(5):511-5. doi: 10.1515/jpm-  
43  
44 593 2015-0004 [published Online First: 2015/05/20]
- 45  
46 594 54. Cassell GH, Davis RO, Waites KB, et al. Isolation of Mycoplasma hominis and  
47  
48 595 Ureaplasma urealyticum from amniotic fluid at 16-20 weeks of gestation: Potential effect on  
49  
50 596 outcome of pregnancy. *Sex Transm Dis* 1983;10(4 SUPPL.):294-302.
- 51  
52 597 55. Embree JE, Krause VW, Embil JA, et al. Placental infection with Mycoplasma hominis  
53  
54 598 and Ureaplasma urealyticum: clinical correlation. *Obstet Gynecol* 1980;56(4):475-81.
- 55  
56  
57  
58  
59  
60

- 1  
2  
3 599 56. Freitas AC, Bocking A, Hill JE, et al. Increased richness and diversity of the vaginal  
4 600 microbiota and spontaneous preterm birth. *Microbiome* 2018;6(1):117. doi: 10.1186/s40168-  
5 601 018-0502-8 [published Online First: 2018/06/30]  
6  
7  
8  
9 602 57. Harada K, Tanaka H, Komori S, et al. Vaginal infection with *Ureaplasma urealyticum*  
10 603 accounts for preterm delivery via induction of inflammatory responses. *Microbiol Immunol*  
11 604 2008;52(6):297-304. doi: <https://dx.doi.org/10.1111/j.1348-0421.2008.00039.x>  
12  
13  
14  
15 605 58. Hillier SL, Martius J, Krohn M, et al. A case-control study of chorioamnionic infection  
16 606 and histologic chorioamnionitis in prematurity. *N Engl J Med* 1988;319(15):972-78.  
17  
18  
19  
20 607 59. Holst E, Goffeng AR, Andersch B. Bacterial vaginosis and vaginal microorganisms in  
21 608 idiopathic premature labor and association with pregnancy outcome. *J Clin Microbiol*  
22 609 1994;32(1):176-86.  
23  
24  
25  
26 610 60. Kafetzis DA, Skevaki CL, Skouteri V, et al. Maternal genital colonization with  
27 611 *Ureaplasma urealyticum* promotes preterm delivery: association of the respiratory  
28 612 colonization of premature infants with chronic lung disease and increased mortality. *Clin*  
29 613 *Infect Dis* 2004;39(8):1113-22. doi: <https://dx.doi.org/10.1086/424505>  
30  
31  
32  
33  
34 614 61. McDonald HM, O'Loughlin JA, Jolley P, et al. Prenatal microbiological risk factors  
35 615 associated with preterm birth. *Br J Obstet Gynaecol* 1992;99(3):190-6. [published Online  
36 616 First: 1992/03/01]  
37  
38  
39  
40 617 62. Mitsunari M, Yoshida S, Deura I, et al. Cervical *Ureaplasma urealyticum* colonization  
41 618 might be associated with increased incidence of preterm delivery in pregnant women without  
42 619 prophlogistic microorganisms on routine examination. *J Obstet Gynaecol Res* 2005;31(1):16-  
43 620 21. doi: <https://dx.doi.org/10.1111/j.1447-0756.2005.00246.x>  
44  
45  
46  
47  
48 621 63. Munday PE, Porter R, Falder PF. Spontaneous abortion, an infectious aetiology? *Br J*  
49 622 *Obstet Gynaecol* 1984;91(12):1177-80.  
50  
51  
52  
53 623 64. Payne MS, Feng Z, Li S, et al. Second trimester amniotic fluid cytokine concentrations,  
54 624 *Ureaplasma* sp. colonisation status and sexual activity as predictors of preterm birth in  
55 625 Chinese and Australian women. *BMC Pregnancy Childbirth* 2014;14:340. doi:  
56 626 <https://dx.doi.org/10.1186/1471-2393-14-340>  
57  
58  
59  
60



- 627 65. Povlsen K, Thorsen P, Lind I. Relationship of *Ureaplasma urealyticum* biovars to the  
628 presence or absence of bacterial vaginosis in pregnant women and to the time of delivery. *Eur*  
629 *J Clin Microbiol Infect Dis* 2001;20(1):65-7. [published Online First: 2001/03/14]
- 630 66. Toth KS, Letchworth AT, Noble AD, et al. The significance of infection in the aetiology  
631 of preterm labour. A prospective controlled study. *J Obstet Gynaecol* 1992;12(2):94-99.
- 632 67. Yoon BH, Oh SY, Romero R, et al. An elevated amniotic fluid matrix metalloproteinase-  
633 8 level at the time of mid-trimester genetic amniocentesis is a risk factor for spontaneous  
634 preterm delivery. *Am J Obstet Gynecol* 2001;185(5):1162-7. doi:  
635 <https://dx.doi.org/10.1067/mob.2001.117678>
- 636 68. González Bosquet E, Gene A, Ferrer I, et al. Value of endocervical *Ureaplasma* species  
637 colonization as a marker of preterm delivery. *Gynecol Obstet Invest* 2006;61(3):119-23. doi:  
638 <http://dx.doi.org/10.1159/000089457>
- 639 69. Chua KB, Ngeow YF, Lim CT, et al. Colonization and transmission of *Ureaplasma*  
640 *urealyticum* and *Mycoplasma hominis* from mothers to full and preterm babies by normal  
641 vaginal delivery. *Med J Malaysia* 1999;54(2):242-6. [published Online First: 2000/09/06]
- 642 70. Jalava J, Laurikainen E, Karkkainen U, et al. Cervical *ureaplasma urealyticum*  
643 colonization: comparison of PCR and culture for its detection and association with preterm  
644 birth. *Scand J Infect Dis* 2002;34(1):35-40.
- 645 71. Kacerovsky M, Pavlovsky M, Tosner J. Preterm premature rupture of the membranes and  
646 genital mycoplasmas. *Acta Medica (Hradec Kralove)* 2009;52(3):117-20.
- 647 72. Kumar SS, V.; Sharma, M. Bacterial vaginosis in preterm labor. *Int J Gynaecol Obstet*  
648 2006;95(1):40-41. doi: <http://dx.doi.org/10.1016/j.ijgo.2006.05.022>
- 649 73. Montenegro DA, Borda LF, Neuta Y, et al. Oral and uro-vaginal intra-amniotic infection  
650 in women with preterm delivery: A case-control study. *J Investig Clin Dent*  
651 2019;10(2):e12396. doi: <http://dx.doi.org/10.1111/jicd.12396>
- 652 74. Abele-Horn M, Scholz M, Wolff C, et al. High-density vaginal *Ureaplasma urealyticum*  
653 colonization as a risk factor for chorioamnionitis and preterm delivery. *Acta Obstet Gynecol*  
654 *Scand* 2000;79(11):973-8.

- 1  
2  
3 655 75. Grattard F, Soleihac B, De Barbeyrac B, et al. Epidemiologic and molecular  
4 656 investigations of genital mycoplasmas from women and neonates at delivery. *Pediatr Infect*  
5 657 *Dis J* 1995;14(10):853-8.  
6  
7  
8  
9 658 76. Kundsinn RB, Driscoll SG, Monson RR, et al. Association of *Ureaplasma urealyticum* in  
10 659 the placenta with perinatal morbidity and mortality. *N Engl J Med* 1984;310(15):941-45.  
11  
12  
13 660 77. McCormack WM, Rosner B, Lee YH, et al. Isolation of genital mycoplasmas from blood  
14 661 obtained shortly after vaginal delivery. *Lancet* 1975;1(7907):596-9.  
15  
16  
17  
18 662 78. Sweeney EL, Kallapur SG, Gisslen T, et al. Placental Infection With *Ureaplasma* species  
19 663 Is Associated With Histologic Chorioamnionitis and Adverse Outcomes in Moderately  
20 664 Preterm and Late-Preterm Infants. *J Infect Dis* 2016;213(8):1340-47. doi:  
21 665 10.1093/infdis/jiv587  
22  
23  
24  
25  
26 666 79. Nasution TA, Cheong SF, Lim CT, et al. Multiplex PCR for the detection of urogenital  
27 667 pathogens in mothers and newborns. *Malays J Pathol* 2007;29(1):19-24.  
28  
29  
30  
31 668 80. Ma C, Du J, Dou Y, et al. The Associations of Genital Mycoplasmas with Female  
32 669 Infertility and Adverse Pregnancy Outcomes: a Systematic Review and Meta-analysis.  
33 670 *Reprod Sci* 2021:1-19.  
34  
35  
36  
37 671 81. D'Inzeo T, De Angelis G, Fiori B, et al. Comparison of *Mycoplasma* IES, Mycofast  
38 672 Revolution and *Mycoplasma* IST2 to detect genital mycoplasmas in clinical samples. *J Infect*  
39 673 *Dev Ctries* 2017;11(01):98-101.  
40  
41  
42  
43 674 82. Kusanovic JP, Vargas P, Ferrer F, et al. Comparison of two identification and  
44 675 susceptibility test kits for *Ureaplasma* spp and *Mycoplasma hominis* in amniotic fluid of  
45 676 patients at high risk for intra-amniotic infection. *J Matern -Fetal Neonatal Med*  
46 677 2020;33(20):3409-17. doi: 10.1080/14767058.2019.1572742  
47  
48  
49  
50  
51 678 83. Taylor-Robinson D. Infections Due to Species of *Mycoplasma* and *Ureaplasma*: An  
52 679 Update. *Clin Infect Dis* 1996;23(4):671-82. doi: 10.1093/clinids/23.4.671  
53  
54  
55  
56 680 84. Pavlidis I, Spiller OB, Demarco GS, et al. Cervical epithelial damage promotes  
57 681 *Ureaplasma parvum* ascending infection, intrauterine inflammation and preterm birth  
58 682 induction in mice. *Nat Commun* 2020;11(1):1-12.  
59  
60

- 1  
2  
3 683 85. Kasper DC, Mechtler TP, Reischer GH, et al. The bacterial load of *Ureaplasma parvum* in  
4 684 amniotic fluid is correlated with an increased intrauterine inflammatory response. *Diagn*  
5 685 *Microbiol Infect Dis* 2010;67(2):117-21. doi:  
6 686 <https://dx.doi.org/10.1016/j.diagmicrobio.2009.12.023>  
7  
8  
9  
10  
11 687 86. Witt A, Berger A, Gruber CJ, et al. Increased intrauterine frequency of *Ureaplasma*  
12 688 *urealyticum* in women with preterm labor and preterm premature rupture of the membranes  
13 689 and subsequent cesarean delivery. *Am J Obstet Gynecol* 2005;193(5):1663-9. doi:  
14 690 10.1016/j.ajog.2005.03.067 [published Online First: 2005/11/02]  
15  
16  
17  
18  
19 691 87. Li Y-H, Brauner A, Jonsson B, et al. *Ureaplasma urealyticum*-induced production of  
20 692 proinflammatory cytokines by macrophages. *Pediatr Res* 2000;48(1):114-19.  
21  
22  
23 693 88. Doyle RM, Alber DG, Jones HE, et al. Term and preterm labour are associated with  
24 694 distinct microbial community structures in placental membranes which are independent of  
25 695 mode of delivery. *Placenta* 2014;35(12):1099-101. doi:  
26 696 <https://dx.doi.org/10.1016/j.placenta.2014.10.007>  
27  
28  
29  
30  
31 697 89. Combaz-Söhnchen N, Kuhn A. A systematic review of *Mycoplasma* and *Ureaplasma* in  
32 698 urogynaecology. *Geburtshilfe Frauenheilkd* 2017;77(12):1299.  
33  
34  
35  
36 699 90. Redelinghuys MJ, Ehlers MM, Dreyer AW, et al. Antimicrobial susceptibility patterns of  
37 700 *Ureaplasma* species and *Mycoplasma hominis* in pregnant women. *BMC Infect Dis*  
38 701 2014;14:171. doi: <https://dx.doi.org/10.1186/1471-2334-14-171>  
39  
40  
41  
42 702 91. Bae I, Koh E, Kim S, et al. Prevalence rate and antimicrobial susceptibilities of  
43 703 *Ureaplasma urealyticum* and *Mycoplasma hominis* in pregnant women residing in Jinju,  
44 704 Korea. *Clin Microbiol Infect* 2010;2):S485. doi: [http://dx.doi.org/10.1111/j.1469-](http://dx.doi.org/10.1111/j.1469-0691.2010.03239.x)  
45 705 [0691.2010.03239.x](http://dx.doi.org/10.1111/j.1469-0691.2010.03239.x)  
46  
47  
48  
49  
50 706 92. Bayraktar MR, Ozerol IH, Gucluer N, et al. Prevalence and antibiotic susceptibility of  
51 707 *Mycoplasma hominis* and *Ureaplasma urealyticum* in pregnant women. *Int J Infect Dis*  
52 708 2010;14(2):e90-5. doi: <https://dx.doi.org/10.1016/j.ijid.2009.03.020>  
53  
54  
55  
56 709 93. Valley AJ, Pomat WS, Homer C, et al. Point-of-care testing and treatment of sexually  
57 710 transmitted infections to improve birth outcomes in high-burden, low-income settings: Study

- 1  
2  
3 711 protocol for a cluster randomized crossover trial (the WANTAIM Trial, Papua New Guinea).  
4  
5 712 *Wellcome Open Res* 2019;4  
6  
7  
8 713 94. Grant JS, Chico RM, Lee AC, et al. Sexually transmitted infections in pregnancy: a  
9  
10 714 narrative review of the global research gaps, challenges, and opportunities. *Sex Transm Dis*  
11 715 2020;47(12):779.  
12  
13  
14  
15  
16  
17  
18  
19  
20  
21  
22  
23  
24  
25  
26  
27  
28  
29  
30  
31  
32  
33  
34  
35  
36  
37  
38  
39  
40  
41  
42  
43  
44  
45  
46  
47  
48  
49  
50  
51  
52  
53  
54  
55  
56  
57  
58  
59  
60

For peer review only

**Figure legends**

**Figure 1.** Forest plot of univariable association between *M. hominis* and preterm birth, from random effects meta-analysis. Studies are in order of precision. Solid diamonds and lines either side are point estimates and 95% confidence intervals for individual studies (arrows show where lower or upper confidence limits extend beyond the x-axis limits). Open diamond shows the point estimate and 95% confidence interval for the summary odds ratio and lines either side of the diamond show the prediction interval.

**Figure 2.** Forest plot of univariable association between *U. urealyticum* and preterm birth, from random effects meta-analysis. Studies are in order of sample size. Solid diamonds and lines either side are point estimates and 95% confidence intervals for individual studies (arrows show where lower or upper confidence limits extend beyond the x-axis limits). Open diamond shows the point estimate and 95% confidence interval for the summary odds ratio and lines either side of the diamond show the prediction interval.

**Figure 3.** Forest plot of univariable association between *U. parvum* and preterm birth, from random effects meta-analysis. Studies are in order of precision. Solid diamonds and lines either side are point estimates and 95% confidence intervals for individual studies (arrows show where lower or upper confidence limits extend beyond the x-axis limits). Open diamond shows the point estimate and 95% confidence interval for the summary odds ratio and lines either side of the diamond show the prediction interval.

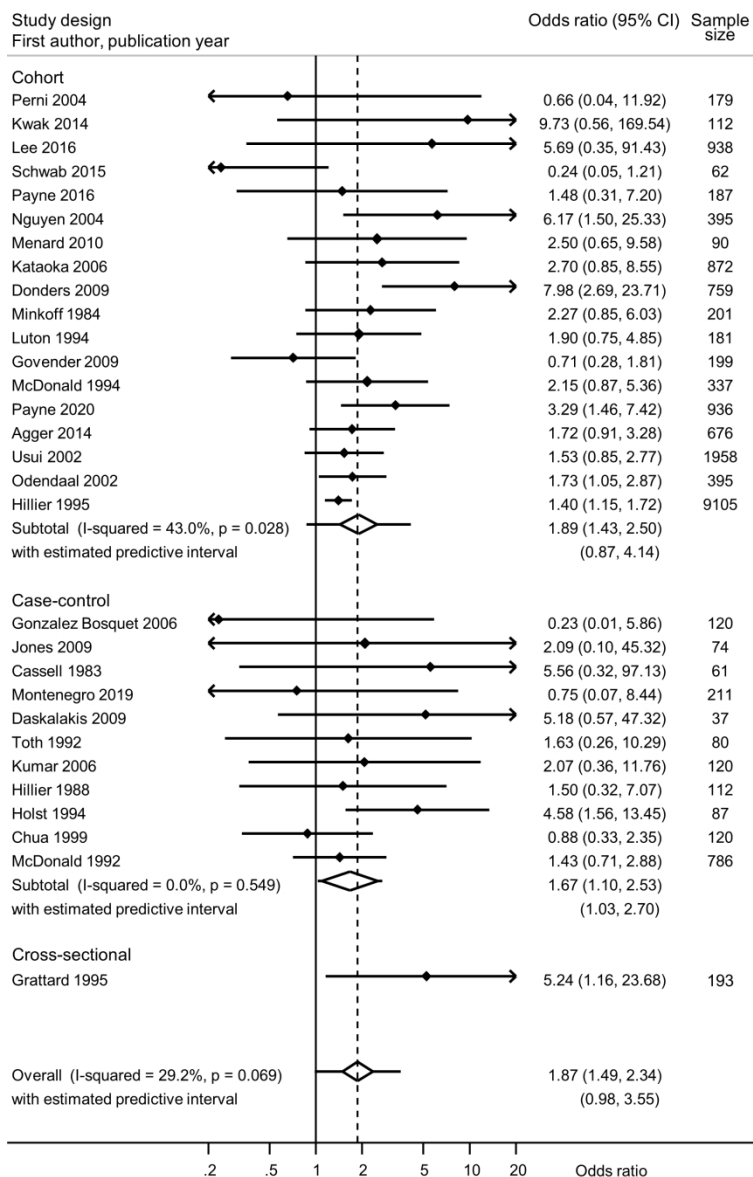

Figure 1. Forest plot of univariable association between *M. hominis* and preterm birth, from random effects meta-analysis. Studies are in order of precision. Solid diamonds and lines either side are point estimates and 95% confidence intervals for individual studies (arrows show where lower or upper confidence limits extend beyond the x-axis limits). Open diamond shows the point estimate and 95% confidence interval for the summary odds ratio and lines either side of the diamond show the predictive interval.

170x270mm (300 x 300 DPI)

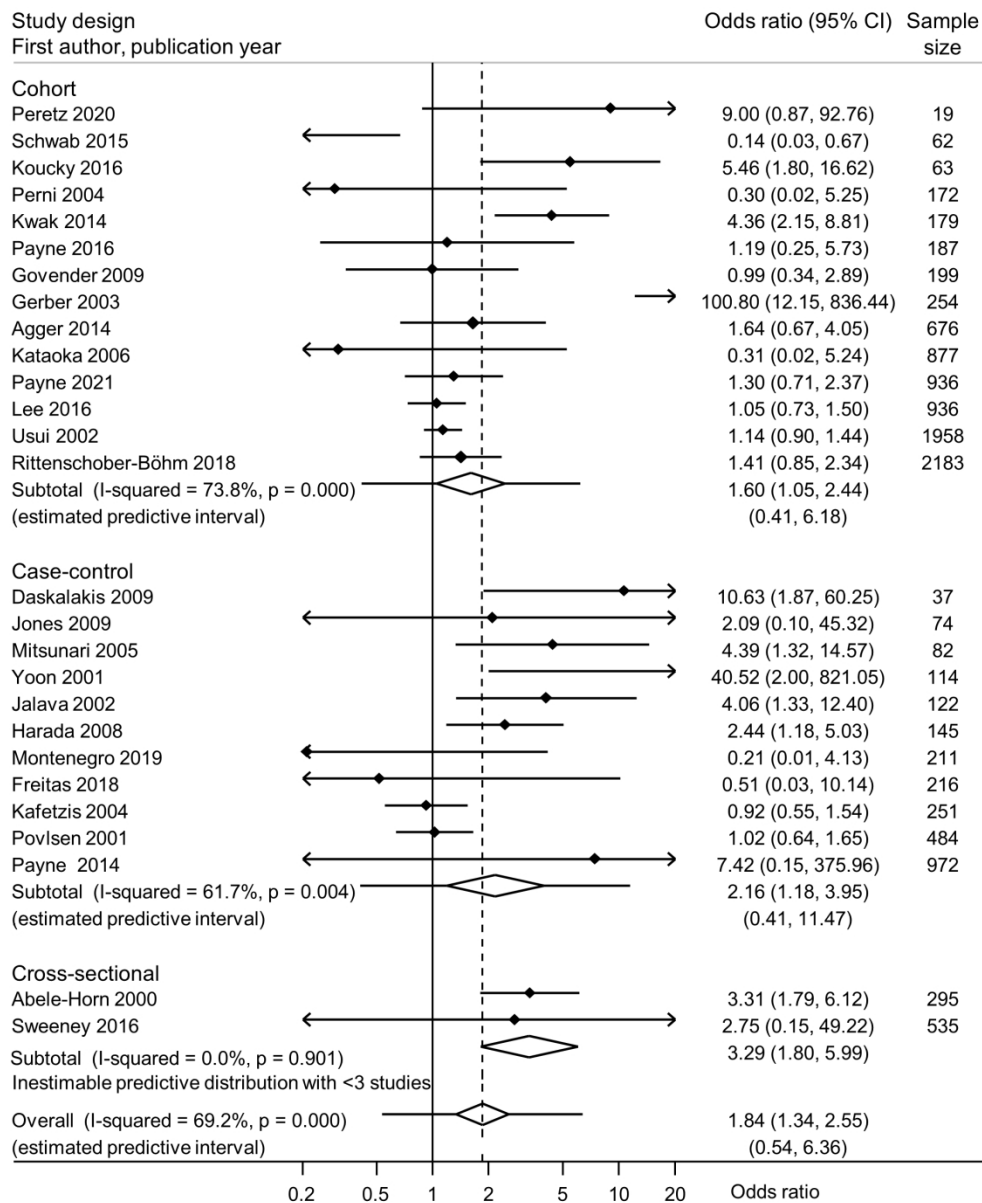

Figure 2. Forest plot of univariable association between *U. urealyticum* and preterm birth, from random effects meta-analysis. Studies are in order of sample size. Solid diamonds and lines either side are point estimates and 95% confidence intervals for individual studies (arrows show where lower or upper confidence limits extend beyond the x-axis limits). Open diamond shows the point estimate and 95% confidence interval for the summary odds ratio and lines either side of the diamond show the predictive interval.

178x218mm (300 x 300 DPI)

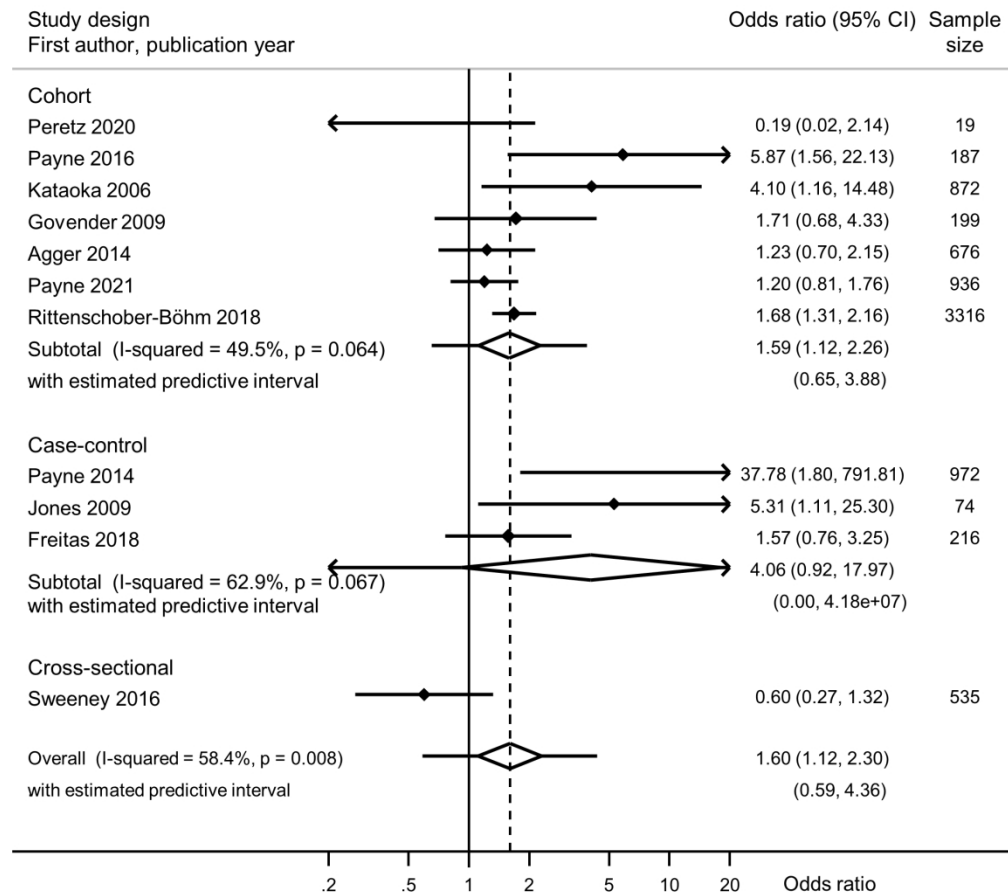

Figure 3. Forest plot of univariable association between *U. parvum* and preterm birth, from random effects meta-analysis. Studies are in order of precision. Solid diamonds and lines either side are point estimates and 95% confidence intervals for individual studies (arrows show where lower or upper confidence limits extend beyond the x-axis limits). Open diamond shows the point estimate and 95% confidence interval for the summary odds ratio and lines either side of the diamond show the predictive interval.

175x156mm (300 x 300 DPI)



## Supplementary Material

### **Adverse birth outcomes associated with *Mycoplasma hominis*, *Ureaplasma urealyticum* and *Ureaplasma parvum*: A systematic review and meta-analysis.**

Marinjho Emely JONDUO (MSc),<sup>1</sup> Lisa Michelle VALLELY (PhD),<sup>1,2</sup> Handan WAND (PhD),<sup>3</sup> Emma Louise SWEENEY (PhD),<sup>4</sup> Dianne EGLI-GANY (PhD),<sup>5</sup> John Martin KALDOR (PhD),<sup>1</sup> Andrew John VALLELY (PhD),<sup>1,2</sup> Nicola LOW (PhD).<sup>5</sup>

<sup>1</sup> Public Health Interventions Research Program, The Kirby Institute, University of New South Wales, Sydney, NSW 2052, Australia.

<sup>2</sup> Sexual and Reproductive Health Unit, Papua New Guinea Institute of Medical Research, Goroka, Eastern Highlands Province 441, Papua New Guinea.

<sup>3</sup> Biostatistics and Databases program, The Kirby Institute, University of New South Wales, Sydney, New South Wales, Australia.

<sup>4</sup> The University of Queensland Center for Clinical Research, Brisbane, Queensland 4029, Australia.

<sup>5</sup> Institute of Social and Preventive Medicine, University of Bern, CH-3012 Bern, Switzerland.

## **Table of Contents**

|                                                                                                                                                             |    |
|-------------------------------------------------------------------------------------------------------------------------------------------------------------|----|
| <b>Table of Contents</b> .....                                                                                                                              | 2  |
| <b>A. 1 Preferred reporting items for systematic review and meta-analysis (PRISMA)</b> .....                                                                | 4  |
| <b>A.2 Preferred reporting checklist of Meta-analysis (MOOSE)<sup>1</sup></b> .....                                                                         | 10 |
| <b>A.3 Search strategy</b> .....                                                                                                                            | 13 |
| <b>Figure S1 Flow chart of identified and selected studies for inclusion</b> .....                                                                          | 14 |
| <b>Table S1 Summary of characteristics of included studies</b> .....                                                                                        | 15 |
| <b>Figure S3.1 Forest plot of association between <i>M. hominis</i> and premature rupture of membrane, random effects model.</b> .....                      | 33 |
| <b>Figure S3.2 Forest plot of association between <i>M. hominis</i> and low birthweight, random effects model.</b> .....                                    | 34 |
| <b>Figure S3.3 Forest plot of association between <i>M. hominis</i> and perinatal death random effects model.</b> .....                                     | 35 |
| <b>Figure S3.4 Forest plot of association between <i>M. hominis</i> and spontaneous abortion random effects model.</b> .....                                | 36 |
| <b>Figure S4.1 Forest plot of association between <i>U. urealyticum</i> and premature rupture of membrane, random effects model.</b> .....                  | 37 |
| <b>Figure S4.2 Forest plot of association between <i>U. urealyticum</i> and low birth weight, random effects model.</b> .....                               | 38 |
| <b>Figure S4.3 Forest plot of association between <i>U. urealyticum</i> and spontaneous abortion, random effects model.</b> .....                           | 39 |
| <b>Figure S5.1 Forest plot of association between <i>U. parvum</i> and premature rupture of membrane, random effects model.</b> .....                       | 41 |
| <b>Figure S5.2 Forest plot of association between <i>U. parvum</i> and spontaneous abortion random effects model</b> .....                                  | 42 |
| <b>Table S2.1 Descriptive tables: Cohort studies (n=26)</b> .....                                                                                           | 43 |
| <b>Table S2.2 Descriptive tables: Case control studies (n=25)</b> .....                                                                                     | 49 |
| <b>Table S2.3 Descriptive tables: Cross sectional studies (n=6)</b> .....                                                                                   | 53 |
| <b>Table S3.1 Summary description of studies reporting <i>M. hominis</i> (n=42), by income status</b> .....                                                 | 55 |
| <b>Table S3.2 Summary description of studies reporting <i>U. urealyticum</i> (n=31), by income status</b> .....                                             | 64 |
| <b>Table S3.3 Summary description of studies reporting <i>U. parvum</i> (n=12), by income status</b> .....                                                  | 71 |
| <b>Table S4.1 Study setting and socio-demographics, cohort studies (n=26)</b> .....                                                                         | 74 |
| <b>Table S4.2 Study setting and socio-demographics, case-control studies (n=25)</b> .....                                                                   | 77 |
| <b>Table S4.3 Study setting and socio-demographics, cross-sectional studies (n=6)</b> .....                                                                 | 80 |
| <b>Table S5 Studies that reported on bacterial vaginosis or sexually transmitted infections and reported associations with adverse birth outcomes</b> ..... | 81 |
| <b>Table S6.1 Risk of bias assessment, cohort studies (n=26)</b> .....                                                                                      | 86 |

|    |                                                                                                     |     |
|----|-----------------------------------------------------------------------------------------------------|-----|
| 1  |                                                                                                     |     |
| 2  |                                                                                                     |     |
| 3  |                                                                                                     |     |
| 4  | <b>Table S6.2</b> Risk of bias assessment, case-control studies (n=25) .....                        | 101 |
| 5  |                                                                                                     |     |
| 6  | <b>Table S6.3</b> Risk of bias assessment, cross-sectional studies (n=6) .....                      | 109 |
| 7  |                                                                                                     |     |
| 8  | <b>Table S7</b> Summary of assessment of funnel plot asymmetry, for outcomes reported in 10 or more |     |
| 9  | studies .....                                                                                       | 111 |
| 10 |                                                                                                     |     |
| 11 |                                                                                                     |     |
| 12 |                                                                                                     |     |
| 13 |                                                                                                     |     |
| 14 |                                                                                                     |     |
| 15 |                                                                                                     |     |
| 16 |                                                                                                     |     |
| 17 |                                                                                                     |     |
| 18 |                                                                                                     |     |
| 19 |                                                                                                     |     |
| 20 |                                                                                                     |     |
| 21 |                                                                                                     |     |
| 22 |                                                                                                     |     |
| 23 |                                                                                                     |     |
| 24 |                                                                                                     |     |
| 25 |                                                                                                     |     |
| 26 |                                                                                                     |     |
| 27 |                                                                                                     |     |
| 28 |                                                                                                     |     |
| 29 |                                                                                                     |     |
| 30 |                                                                                                     |     |
| 31 |                                                                                                     |     |
| 32 |                                                                                                     |     |
| 33 |                                                                                                     |     |
| 34 |                                                                                                     |     |
| 35 |                                                                                                     |     |
| 36 |                                                                                                     |     |
| 37 |                                                                                                     |     |
| 38 |                                                                                                     |     |
| 39 |                                                                                                     |     |
| 40 |                                                                                                     |     |
| 41 |                                                                                                     |     |
| 42 |                                                                                                     |     |
| 43 |                                                                                                     |     |
| 44 |                                                                                                     |     |
| 45 |                                                                                                     |     |
| 46 |                                                                                                     |     |
| 47 |                                                                                                     |     |
| 48 |                                                                                                     |     |
| 49 |                                                                                                     |     |
| 50 |                                                                                                     |     |
| 51 |                                                                                                     |     |
| 52 |                                                                                                     |     |
| 53 |                                                                                                     |     |
| 54 |                                                                                                     |     |
| 55 |                                                                                                     |     |
| 56 |                                                                                                     |     |
| 57 |                                                                                                     |     |
| 58 |                                                                                                     |     |
| 59 |                                                                                                     |     |
| 60 |                                                                                                     |     |

For peer review only

A. 1 Preferred reporting items for systematic review and meta-analysis (PRISMA)

| Section and Topic    | Item # | Checklist item                                                                                                                                                                                            | Location where item is reported |
|----------------------|--------|-----------------------------------------------------------------------------------------------------------------------------------------------------------------------------------------------------------|---------------------------------|
| TITLE                |        |                                                                                                                                                                                                           |                                 |
| Title                | 1      | Identify the report as a systematic review.                                                                                                                                                               | 1                               |
| ABSTRACT             |        |                                                                                                                                                                                                           |                                 |
| Abstract             | 2      | See the PRISMA 2020 for Abstracts checklist.                                                                                                                                                              | 4-5                             |
| INTRODUCTION         |        |                                                                                                                                                                                                           |                                 |
| Rationale            | 3      | Describe the rationale for the review in the context of existing knowledge.                                                                                                                               | 6                               |
| Objectives           | 4      | Provide an explicit statement of the objective(s) or question(s) the review addresses.                                                                                                                    | 7                               |
| METHODS              |        |                                                                                                                                                                                                           |                                 |
| Eligibility criteria | 5      | Specify the inclusion and exclusion criteria for the review and how studies were grouped for the syntheses.                                                                                               | 7                               |
| Information sources  | 6      | Specify all databases, registers, websites, organisations, reference lists and other sources searched or consulted to identify studies. Specify the date when each source was last searched or consulted. | 8                               |
| Search strategy      | 7      | Present the full search strategies for all databases, registers and websites, including any filters and limits used.                                                                                      | Appendix S1                     |
| Selection process    | 8      | Specify the methods used to decide whether a study met the inclusion criteria of the review, including how many reviewers screened each record and each report                                            | 8                               |

| Section and Topic             | Item # | Checklist item                                                                                                                                                                                                                                                                                       | Location where item is reported |
|-------------------------------|--------|------------------------------------------------------------------------------------------------------------------------------------------------------------------------------------------------------------------------------------------------------------------------------------------------------|---------------------------------|
|                               |        | retrieved, whether they worked independently, and if applicable, details of automation tools used in the process.                                                                                                                                                                                    |                                 |
| Data collection process       | 9      | Specify the methods used to collect data from reports, including how many reviewers collected data from each report, whether they worked independently, any processes for obtaining or confirming data from study investigators, and if applicable, details of automation tools used in the process. | 8-9                             |
| Data items                    | 10a    | List and define all outcomes for which data were sought. Specify whether all results that were compatible with each outcome domain in each study were sought (e.g. for all measures, time points, analyses), and if not, the methods used to decide which results to collect.                        | 6                               |
|                               | 10b    | List and define all other variables for which data were sought (e.g. participant and intervention characteristics, funding sources). Describe any assumptions made about any missing or unclear information.                                                                                         | 8-9                             |
| Study risk of bias assessment | 11     | Specify the methods used to assess risk of bias in the included studies, including details of the tool(s) used, how many reviewers assessed each study and whether they worked independently, and if applicable, details of automation tools used in the process.                                    | 9                               |
| Effect measures               | 12     | Specify for each outcome the effect measure(s) (e.g. risk ratio, mean difference) used in the synthesis or presentation of results.                                                                                                                                                                  | 9                               |
| Synthesis methods             | 13a    | Describe the processes used to decide which studies were eligible for each synthesis (e.g. tabulating the study intervention characteristics and comparing against the planned groups for each synthesis (item #5)).                                                                                 | 9                               |

| Section and Topic         | Item # | Checklist item                                                                                                                                                                                                                                              | Location where item is reported |
|---------------------------|--------|-------------------------------------------------------------------------------------------------------------------------------------------------------------------------------------------------------------------------------------------------------------|---------------------------------|
|                           | 13b    | Describe any methods required to prepare the data for presentation or synthesis, such as handling of missing summary statistics, or data conversions.                                                                                                       | 9                               |
|                           | 13c    | Describe any methods used to tabulate or visually display results of individual studies and syntheses.                                                                                                                                                      | 9                               |
|                           | 13d    | Describe any methods used to synthesize results and provide a rationale for the choice(s). If meta-analysis was performed, describe the model(s), method(s) to identify the presence and extent of statistical heterogeneity, and software package(s) used. | 9                               |
|                           | 13e    | Describe any methods used to explore possible causes of heterogeneity among study results (e.g. subgroup analysis, meta-regression).                                                                                                                        | 9                               |
|                           | 13f    | Describe any sensitivity analyses conducted to assess robustness of the synthesized results.                                                                                                                                                                | None                            |
| Reporting bias assessment | 14     | Describe any methods used to assess risk of bias due to missing results in a synthesis (arising from reporting biases).                                                                                                                                     | 9                               |
| Certainty assessment      | 15     | Describe any methods used to assess certainty (or confidence) in the body of evidence for an outcome.                                                                                                                                                       | 9                               |
| <b>RESULTS</b>            |        |                                                                                                                                                                                                                                                             |                                 |
| Study selection           | 16a    | Describe the results of the search and selection process, from the number of records identified in the search to the number of studies included in the review, ideally using a flow diagram.                                                                | Figure S1                       |

| Section and Topic             | Item # | Checklist item                                                                                                                                                                                                                                                                       | Location where item is reported                      |
|-------------------------------|--------|--------------------------------------------------------------------------------------------------------------------------------------------------------------------------------------------------------------------------------------------------------------------------------------|------------------------------------------------------|
|                               | 16b    | Cite studies that might appear to meet the inclusion criteria, but which were excluded, and explain why they were excluded.                                                                                                                                                          | Figure S1                                            |
| Study characteristics         | 17     | Cite each included study and present its characteristics.                                                                                                                                                                                                                            | Table S1, reference list                             |
| Risk of bias in studies       | 18     | Present assessments of risk of bias for each included study.                                                                                                                                                                                                                         | 11, supporting information                           |
| Results of individual studies | 19     | For all outcomes, present, for each study: (a) summary statistics for each group (where appropriate) and (b) an effect estimate and its precision (e.g. confidence/credible interval), ideally using structured tables or plots.                                                     | Table 1, Fig 1, Fig 2, Fig 3, supporting information |
| Results of syntheses          | 20a    | For each synthesis, briefly summarise the characteristics and risk of bias among contributing studies.                                                                                                                                                                               | 11, supporting information                           |
|                               | 20b    | Present results of all statistical syntheses conducted. If meta-analysis was done, present for each the summary estimate and its precision (e.g. confidence/credible interval) and measures of statistical heterogeneity. If comparing groups, describe the direction of the effect. | 11-14                                                |
|                               | 20c    | Present results of all investigations of possible causes of heterogeneity among study results.                                                                                                                                                                                       | Supporting information                               |
|                               | 20d    | Present results of all sensitivity analyses conducted to assess the robustness of the synthesized results.                                                                                                                                                                           | None                                                 |
| Reporting biases              | 21     | Present assessments of risk of bias due to missing results (arising from reporting biases) for each synthesis assessed.                                                                                                                                                              | None                                                 |

| Section and Topic         | Item # | Checklist item                                                                                                                                 | Location where item is reported             |
|---------------------------|--------|------------------------------------------------------------------------------------------------------------------------------------------------|---------------------------------------------|
| Certainty of evidence     | 22     | Present assessments of certainty (or confidence) in the body of evidence for each outcome assessed.                                            | Fig 1, Fig 2, Fig 3, supporting information |
| <b>DISCUSSION</b>         |        |                                                                                                                                                |                                             |
| Discussion                | 23a    | Provide a general interpretation of the results in the context of other evidence.                                                              | 15                                          |
|                           | 23b    | Discuss any limitations of the evidence included in the review.                                                                                | 16                                          |
|                           | 23c    | Discuss any limitations of the review processes used.                                                                                          | 15                                          |
|                           | 23d    | Discuss implications of the results for practice, policy, and future research.                                                                 | 17-18                                       |
| <b>OTHER INFORMATION</b>  |        |                                                                                                                                                |                                             |
| Registration and protocol | 24a    | Provide registration information for the review, including register name and registration number, or state that the review was not registered. | 1                                           |
|                           | 24b    | Indicate where the review protocol can be accessed, or state that a protocol was not prepared.                                                 | 1                                           |
|                           | 24c    | Describe and explain any amendments to information provided at registration or in the protocol.                                                | None                                        |
| Support                   | 25     | Describe sources of financial or non-financial support for the review, and the role of the funders or sponsors in the review.                  | 18                                          |
| Competing interests       | 26     | Declare any competing interests of review authors.                                                                                             | 19                                          |

1  
2  
3  
4  
5  
6  
7  
8  
9  
10  
11  
12  
13  
14  
15  
16  
17  
18  
19  
20  
21  
22  
23  
24  
25  
26  
27  
28  
29  
30  
31  
32  
33  
34  
35  
36  
37  
38  
39  
40  
41  
42  
43  
44  
45  
46



| Section and Topic                              | Item # | Checklist item                                                                                                                                                                                                                             | Location where item is reported |
|------------------------------------------------|--------|--------------------------------------------------------------------------------------------------------------------------------------------------------------------------------------------------------------------------------------------|---------------------------------|
| Availability of data, code and other materials | 27     | Report which of the following are publicly available and where they can be found: template data collection forms; data extracted from included studies; data used for all analyses; analytic code; any other materials used in the review. | Supporting information          |

For peer review only

1  
2  
3  
4  
5  
6  
7  
8  
9  
10  
11  
12  
13  
14  
15  
16  
17  
18  
19  
20  
21  
22  
23  
24  
25  
26  
27  
28  
29  
30  
31  
32  
33  
34  
35  
36  
37  
38  
39  
40  
41  
42  
43  
44  
45  
46

**A.2 Preferred reporting checklist of Meta-analysis (MOOSE)<sup>1</sup>**

| Checklist item                                                                          | Page #                                          |
|-----------------------------------------------------------------------------------------|-------------------------------------------------|
| <b>Reporting of background should include</b>                                           |                                                 |
| Problem definition                                                                      | 6                                               |
| Hypothesis statement                                                                    | No                                              |
| Description of study outcome(s)                                                         | 6                                               |
| Type of exposure or intervention used                                                   | 6-7                                             |
| Type of study designs used                                                              | 7                                               |
| Study population                                                                        | 7                                               |
| <b>Reporting of search strategy should include</b>                                      |                                                 |
| Qualifications of searchers (eg. Librarians and investigators)                          | 1                                               |
| Search strategy, including time period included in the synthesis and keywords           | 7-8, Appendix S1                                |
| Effort to include all available studies, including contact with authors                 | No                                              |
| Databases and registries searched                                                       | 8                                               |
| Search software used, name and version, including special features used (eg, explosion) | No                                              |
| Use of hand searching (eg, reference lists of obtained articles)                        | 8                                               |
| List of citations located and those excluded, including justification                   | Fig 1,<br>Table S1, excluded studies not listed |

|                                                                                                                                                                                                                                                                           |                                                      |
|---------------------------------------------------------------------------------------------------------------------------------------------------------------------------------------------------------------------------------------------------------------------------|------------------------------------------------------|
| Method of addressing articles published in languages other than English                                                                                                                                                                                                   | 8                                                    |
| Method of handling abstracts and unpublished studies                                                                                                                                                                                                                      | Excluded                                             |
| Description of any contact with authors                                                                                                                                                                                                                                   | We did not contact authors                           |
| <b>Reporting of methods should include</b>                                                                                                                                                                                                                                |                                                      |
| Description of relevance or appropriateness of studies assembled for assessing the hypothesis to be tested                                                                                                                                                                | 7-8                                                  |
| Rationale for the selection and coding of data (eg, multiple raters, blinding and interrater reliability)                                                                                                                                                                 | 7-8                                                  |
| Assessment of confounding (eg, comparability of cases and controls in studies where appropriate)                                                                                                                                                                          | 7                                                    |
| Assessment of study quality, including blinding of quality assessors; stratification or regression on possible predictors of study results                                                                                                                                | 9                                                    |
| Assessment of heterogeneity                                                                                                                                                                                                                                               | 9                                                    |
| Description of statistical methods (eg, complete description of fixed or random effects models, justification of whether the chosen models account for predictors of study results, dose-response models, cumulative meta-analysis) in sufficient detail to be replicated | 9                                                    |
| Provision of appropriate tables and graphs                                                                                                                                                                                                                                | Main text and supporting information                 |
| <b>Reporting of results should include</b>                                                                                                                                                                                                                                |                                                      |
| Graphic summarizing individual study estimates and overall estimate                                                                                                                                                                                                       | Main text and forest plots in supporting information |

1  
2  
3  
4  
5  
6  
7  
8  
9  
10  
11  
12  
13  
14  
15  
16  
17  
18  
19  
20  
21  
22  
23  
24  
25  
26  
27  
28  
29  
30  
31  
32  
33  
34  
35  
36  
37  
38  
39  
40  
41  
42  
43  
44  
45  
46

|                                                                                                                       |                                                      |
|-----------------------------------------------------------------------------------------------------------------------|------------------------------------------------------|
| Table giving descriptive information for each study included                                                          | Table S1                                             |
| Results of sensitivity testing (eg, subgroup analysis)                                                                | None                                                 |
| Indication of statistical uncertainty of findings                                                                     | Main text and forest plots in supporting information |
| <b>Reporting of discussion should include</b>                                                                         |                                                      |
| Quantitative assessment of bias (eg, publication bias)                                                                | 15-16                                                |
| Justification of exclusion (eg. Exclusion of non-English-language citations)                                          | No (provided pg 8 on methods)                        |
| Assessment of Quality of included studies                                                                             | 15-17                                                |
| <b>Reporting of conclusions should include</b>                                                                        |                                                      |
| Consideration of alternative explanations of observations                                                             | 17-18                                                |
| Generalization of conclusions (ie, appropriate for the data presented and within the domain of the literature review) | 17-18                                                |
| Guidelines for future research                                                                                        | 17-18                                                |
| Disclosure of funding source                                                                                          | 18                                                   |

<sup>1</sup> Stroup DF, Berlin JA, Morton SC, Olkin I, Williamson GD, Rennie D, et al. Meta-analysis of observational studies in epidemiology: a proposal for reporting. **Jama**. 2000 Apr 19;283(15):2008-12.

### A.3 Search strategy

|                            |                                                                                                                                                                                                                                                                                                                                                                                                                                                                                                                                                                                                                                                                                                                                                                                                                                                                       |
|----------------------------|-----------------------------------------------------------------------------------------------------------------------------------------------------------------------------------------------------------------------------------------------------------------------------------------------------------------------------------------------------------------------------------------------------------------------------------------------------------------------------------------------------------------------------------------------------------------------------------------------------------------------------------------------------------------------------------------------------------------------------------------------------------------------------------------------------------------------------------------------------------------------|
| 1. Terms for population    | “pregnancy” or “prenatal” or “antenatal”                                                                                                                                                                                                                                                                                                                                                                                                                                                                                                                                                                                                                                                                                                                                                                                                                              |
| 2. Terms for exposure      | “Mycoplasma hominis” or “M. hominis”; “Ureaplasma urealyticum” or “U. urealyticum”; “Ureaplasma parvum” or “U. parvum”                                                                                                                                                                                                                                                                                                                                                                                                                                                                                                                                                                                                                                                                                                                                                |
| 3. Terms for outcomes      | “birth outcome” or “adverse birth outcome” or “adverse pregnancy outcome” or “perinatal morbidity” or “perinatal mortality” or “perinatal outcome” or “premature birth” or “premature delivery” or “very preterm birth” or “preterm birth” or “preterm delivery” or “premature labour” or “preterm labour” or “premature labor” or “preterm labor” or “premature rupture of membranes” or “preterm rupture of membranes” or “preterm premature rupture of membranes” or “low birth weight” or “intrauterine growth retardation” or “intrauterine growth restriction” or “small for gestational age” or “gestational age” or “stillbirth” or “perinatal mortality” or “perinatal morbidity” or “perinatal death” or “neonatal mortality” or “neonatal morbidity” or “neonatal death” or “fetal death” or “miscarriage” or “spontaneous abortion” or “chorioamnionitis” |
| 4. Search = #1 + # 2 + # 3 |                                                                                                                                                                                                                                                                                                                                                                                                                                                                                                                                                                                                                                                                                                                                                                                                                                                                       |

Free text terms in the search strategy will use truncated and wildcard forms e.g., pregn\*

Explode function used for MeSH headings

Reference lists of retrieved articles searched

**Figure S1** Flow chart of identified and selected studies for inclusion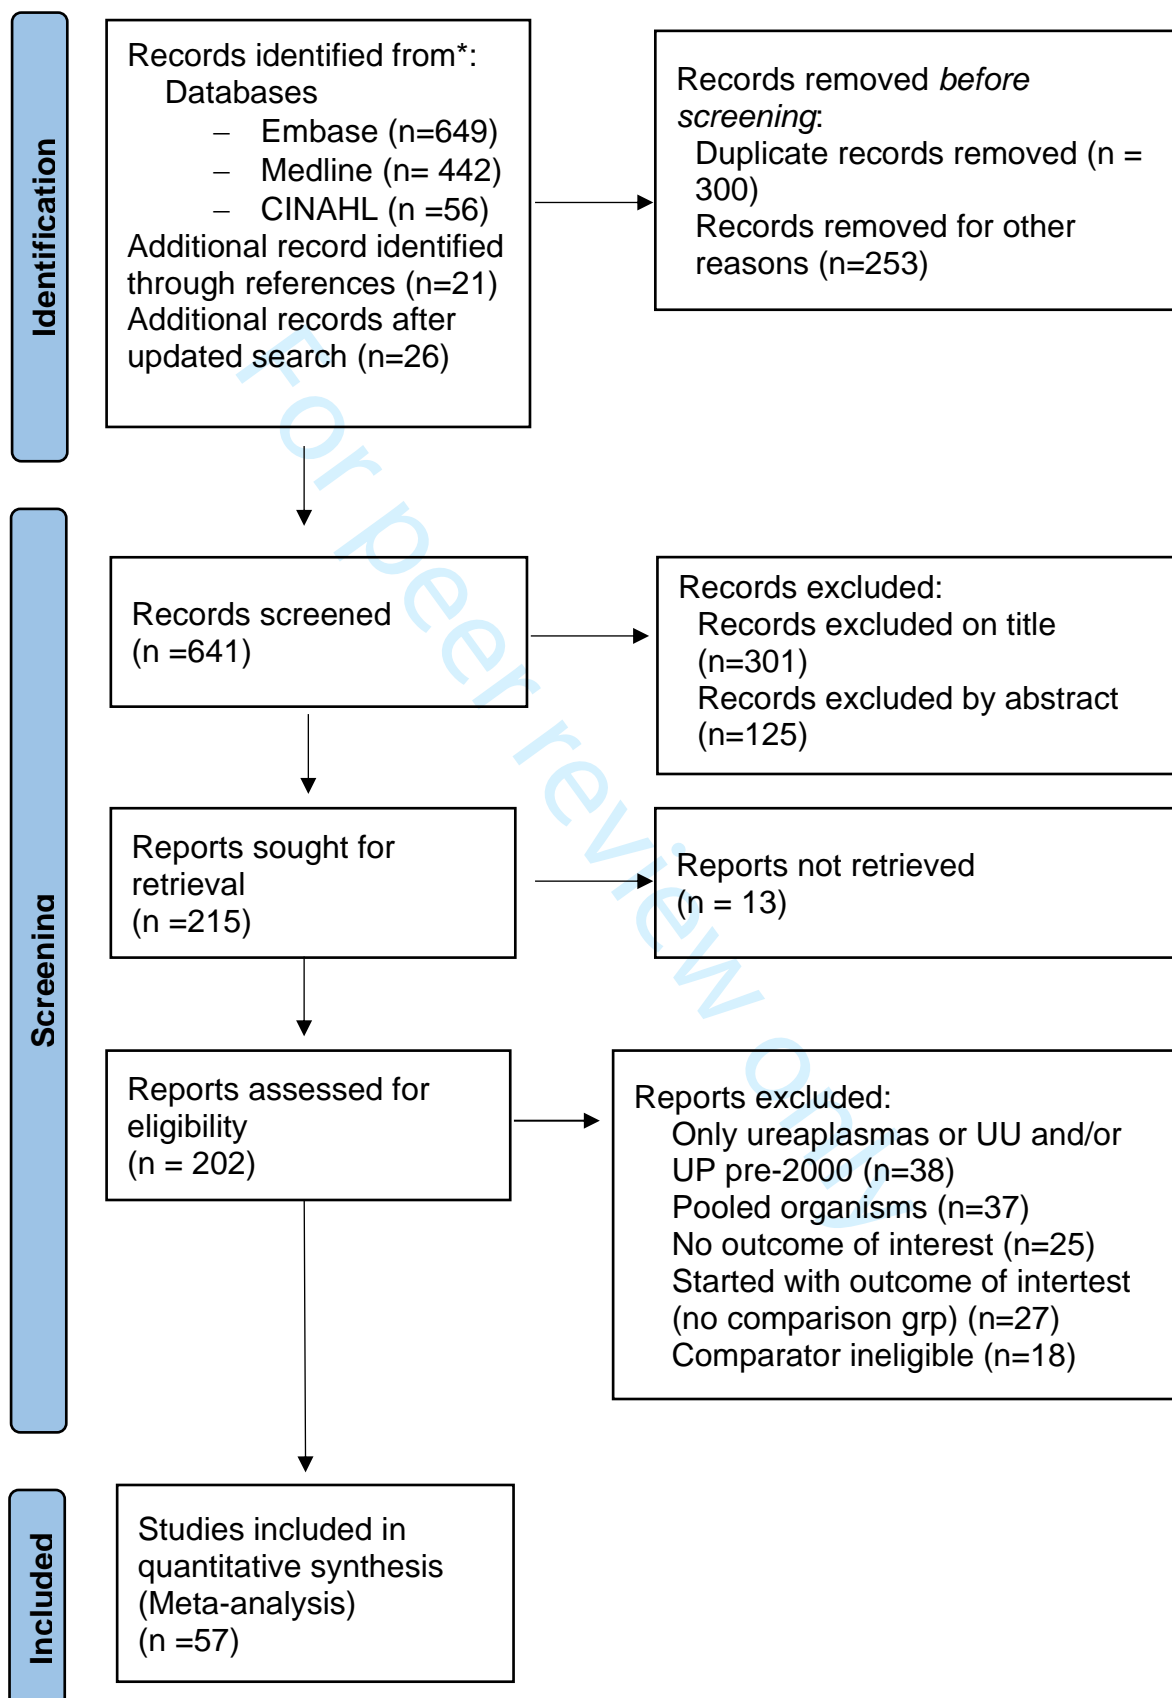

**Table S1** Summary of characteristics of included studies

| First author,<br>publication year,<br>study<br>reference*† | Country | Study<br>design     | Study population                                                                          | Total<br>no. of<br>women | Outcomes<br>measured | Specimen type;<br>collection time                                                   | Diagnostic<br>method | BV<br>assessed |
|------------------------------------------------------------|---------|---------------------|-------------------------------------------------------------------------------------------|--------------------------|----------------------|-------------------------------------------------------------------------------------|----------------------|----------------|
| <b>Abele-Horn,<br/>2000<sup>73</sup></b>                   | Germany | Cross-<br>sectional | Admitted for delivery, Jan - Dec<br>1996                                                  | 295                      | PTB,<br>PROM         | Endocervical swab;<br>1 <sup>st</sup> & 2 <sup>nd</sup> trimester                   | Culture              | Excluded       |
| <b>Agger, 2014<sup>1</sup></b>                             | USA     | Cohort              | 10 to 14 weeks gestation, initial<br>prenatal visit; currently<br>uncomplicated pregnancy | 783                      | PTB                  | Endocervical swab;<br>1 <sup>st</sup> , 2 <sup>nd</sup> trimester                   | NAAT                 | NR             |
| <b>Ahmadi, 2014<sup>9</sup></b>                            | Iran    | Case-<br>control    | 10-20 weeks (cases); normal<br>pregnancy 20-30 weeks<br>(control)                         | 218                      | SA                   | Endocervical swab;<br>1 <sup>st</sup> , 2 <sup>nd</sup> , 3 <sup>rd</sup> trimester | NAAT                 | NR             |
| <b>Berman, 1987<sup>32</sup></b>                           | Mexico  | Cohort              | Women at their prenatal care<br>visit, single centre; Oct 1980 -<br>Oct 1983              | 1204                     | LBW                  | Endocervical swab;<br>1 <sup>st</sup> , 2 <sup>nd</sup> , 3 <sup>rd</sup> trimester | Culture              | NR             |

**Supporting information**For peer review only - <http://bmjopen.bmj.com/site/about/guidelines.xhtml>

1  
2  
3  
4  
5  
6  
7  
8  
9  
10  
11  
12  
13  
14  
15  
16  
17  
18  
19  
20  
21  
22  
23  
24  
25  
26  
27  
28  
29  
30  
31  
32  
33  
34  
35  
36  
37  
38  
39  
40  
41  
42  
43  
44  
45  
46

| First author,<br>publication year,<br>study<br>reference*† | Country  | Study<br>design | Study population                                                                            | Total<br>no. of<br>women | Outcomes<br>measured | Specimen type;<br>collection time                                     | Diagnostic<br>method | BV<br>assessed |
|------------------------------------------------------------|----------|-----------------|---------------------------------------------------------------------------------------------|--------------------------|----------------------|-----------------------------------------------------------------------|----------------------|----------------|
| <b>Braun, 1971<sup>33</sup></b>                            | USA      | Cohort          | Entering antenatal clinic, single centre; Feb-Jul 1969                                      | 688                      | LBW                  | Endocervical swab, urine; 1 <sup>st</sup> & 3 <sup>rd</sup> trimester | Culture              | NR             |
| <b>Cassell, 1983<sup>53</sup></b>                          | USA      | Case-control    | Attending the amniocentesis for prenatal diagnosis, single centre                           | 61                       | PTB, PND             | Amniotic fluid; 2 <sup>nd</sup> trimester                             | Culture              | NR             |
| <b>Chua, 1999<sup>68</sup></b>                             | Malaysia | Case-control    | 60 sequential mother who delivered and premature babies, single centre, Jan 1996- June 1997 | 120                      | PTB                  | Endocervical swab; 2 <sup>nd</sup> , 3 <sup>rd</sup> trimester        | Culture              | NR             |
| <b>Daskalakis, 2009<sup>30</sup></b>                       | NR       | Case-control    | Singleton, normal pregnancy, >18 years old, mid-trimester                                   | 613                      | PTB                  | Amniotic fluid; 2 <sup>nd</sup> trimester                             | Culture              | NR             |

**Supporting information**

For peer review only - <http://bmjopen.bmj.com/site/about/guidelines.xhtml>



| 1                                    | 2       | 3            | 4                                                                                                                                     | 5   | 6       | 7                                                                                | 8       | 9   | 10 | 11 |
|--------------------------------------|---------|--------------|---------------------------------------------------------------------------------------------------------------------------------------|-----|---------|----------------------------------------------------------------------------------|---------|-----|----|----|
| 12                                   | 13      | 14           | 15                                                                                                                                    | 16  | 17      | 18                                                                               | 19      | 20  | 21 | 22 |
| 23                                   | 24      | 25           | 26                                                                                                                                    | 27  | 28      | 29                                                                               | 30      | 31  | 32 | 33 |
| 34                                   | 35      | 36           | 37                                                                                                                                    | 38  | 39      | 40                                                                               | 41      | 42  | 43 | 44 |
| 45                                   | 46      | 47           | 48                                                                                                                                    | 49  | 50      | 51                                                                               | 52      | 53  | 54 | 55 |
|                                      |         |              | amniocentesis, Feb 2006 - Sept 2007                                                                                                   |     |         |                                                                                  |         |     |    |    |
| <b>Donders, 2009<sup>34</sup></b>    | Belgium | Cohort       | Singleton, first antenatal visit between 9 -16 weeks with complete data available on <i>M. hominis</i> cultures; June 2000 – Dec 2001 | 759 | PTB, SA | Vaginal swab; 1 <sup>st</sup> & 2 <sup>nd</sup> trimester                        | Culture | Yes |    |    |
| <b>Embree, 1980<sup>54</sup></b>     | Canada  | Case-control | Single centre, deliveries between May 1977 and Jan 1978                                                                               | 554 | SA, PND | Placenta; Post-partum                                                            | Culture | NR  |    |    |
| <b>Farhadifar, 2016<sup>11</sup></b> | Iran    | Case-control | Admitted in obstetrics and gynaecology wards; no                                                                                      | 218 | SA      | Endocervical swab; 1 <sup>st</sup> , 2 <sup>nd</sup> , 3 <sup>rd</sup> trimester | NAAT    | NR  |    |    |

#### Supporting information

For peer review only - <http://bmjopen.bmj.com/site/about/guidelines.xhtml>

1  
2  
3  
4  
5  
6  
7  
8  
9  
10  
11  
12  
13  
14  
15  
16  
17  
18  
19  
20  
21  
22  
23  
24  
25  
26  
27  
28  
29  
30  
31  
32  
33  
34  
35  
36  
37  
38  
39  
40  
41  
42  
43  
44  
45  
46

| First author,<br>publication year,<br>study<br>reference*† | Country | Study<br>design  | Study population                                                                                           | Total<br>no. of<br>women | Outcomes<br>measured | Specimen type;<br>collection time            | Diagnostic<br>method | BV<br>assessed |
|------------------------------------------------------------|---------|------------------|------------------------------------------------------------------------------------------------------------|--------------------------|----------------------|----------------------------------------------|----------------------|----------------|
|                                                            |         |                  | antibiotics two weeks before<br>sampling, no chronic disease,<br>vaginal infection; Aug 2012 –<br>Jan 2013 |                          |                      |                                              |                      |                |
| <b>Freitas, 2018<sup>55</sup></b>                          | Canada  | Case-<br>control | Spontaneous preterm birth and<br>term deliveries, multicentre                                              | 216                      | PTB                  | Vaginal swab; 2 <sup>nd</sup><br>trimester   | NAAT                 | NR             |
| <b>Gerber, 2003<sup>80</sup></b>                           | NR      | Cohort           | Transabdominal amniocentesis<br>at 15-17 weeks GA; singleton<br>without complicated pregnancy              | 254                      | PTB,<br>PROM         | Amniotic fluid; 2 <sup>nd</sup><br>trimester | NAAT                 | NR             |
| <b>González<br/>Bosquet, 2006<sup>67</sup></b>             | NR      | Case-<br>control | Case: 24-34 weeks PTL, intact<br>membranes; control: no history                                            | 250                      | PTB                  | Endocervical swab;<br>NR                     | Culture              | Yes            |

**Supporting information**

For peer review only - <http://bmjopen.bmj.com/site/about/guidelines.xhtml>

| 1<br>2<br>3<br>4<br>5<br>6<br>7<br>8<br>9<br>10<br>11<br>12 | 13              | 14                  | 15                                                                                                        | 16  | 17                   | 18                                                                | 19               | 20 | 21 |
|-------------------------------------------------------------|-----------------|---------------------|-----------------------------------------------------------------------------------------------------------|-----|----------------------|-------------------------------------------------------------------|------------------|----|----|
| 22                                                          | 23              | 24                  | 25                                                                                                        | 26  | 27                   | 28                                                                | 29               | 30 | 31 |
| 32                                                          | 33              | 34                  | 35                                                                                                        | 36  | 37                   | 38                                                                | 39               | 40 | 41 |
| 42                                                          | 43              | 44                  | 45                                                                                                        | 46  | 47                   | 48                                                                | 49               | 50 | 51 |
|                                                             |                 |                     | of preterm birth at same stage of<br>delivery                                                             |     |                      |                                                                   |                  |    |    |
| <b>Govender, 2009<sup>79</sup></b>                          | South<br>Africa | Cohort              | Low risk obstetric patients at<br>first prenatal visit (16-23 weeks<br>gestation)                         | 199 | PTB                  | Endocervical swab;<br>2 <sup>nd</sup> trimester                   | NAAT             | NR |    |
| <b>Grattard, 1995<sup>74</sup></b>                          | France          | Cross-<br>sectional | Women who delivered between<br>Feb - May 1993 in obstetrical<br>ward and their neonates, single<br>centre | 208 | PTB,<br>LBW<br>PROM, | Endocervical swab;<br>post-partum                                 | Culture          | NR |    |
| <b>Harada, 2008<sup>56</sup></b>                            | Japan           | Case-<br>control    | Premature and term deliveries,<br>Jan 2006 - July 2007                                                    | 145 | PTB                  | Endocervical swab;<br>2 <sup>nd</sup> , 3 <sup>rd</sup> trimester | NAAT,<br>Culture | NR |    |

#### Supporting information

For peer review only - <http://bmjopen.bmj.com/site/about/guidelines.xhtml>

1  
2  
3  
4  
5  
6  
7  
8  
9  
10  
11  
12  
13  
14  
15  
16  
17  
18  
19  
20  
21  
22  
23  
24  
25  
26  
27  
28  
29  
30  
31  
32  
33  
34  
35  
36  
37  
38  
39  
40  
41  
42  
43  
44  
45  
46

| First author,<br>publication year,<br>study<br>reference*† | Country | Study<br>design | Study population                                                                                  | Total<br>no. of<br>women | Outcomes<br>measured | Specimen type;<br>collection time                                                   | Diagnostic<br>method | BV<br>assessed |
|------------------------------------------------------------|---------|-----------------|---------------------------------------------------------------------------------------------------|--------------------------|----------------------|-------------------------------------------------------------------------------------|----------------------|----------------|
| Harrison, 1983 <sup>37</sup>                               | USA     | Cohort          | Enrolled at their first prenatal visit, single centre                                             | 860                      | SA                   | Endocervical swab;<br>1 <sup>st</sup> , 2 <sup>nd</sup> , 3 <sup>rd</sup> trimester | Culture,<br>ELISA    | NR             |
| Hillier, 1988 <sup>57</sup>                                | USA     | Case-control    | Age >16 years; no antibiotics in previous 2 weeks; no known fetal anomaly; June 1984- June 1985   | 112                      | PTB                  | Placenta; Post-partum                                                               | Culture              | Yes            |
| Hillier, 1995 <sup>31</sup>                                | USA     | Cohort          | > 16 years, singleton pregnancies at routine prenatal visits (23 to 26 weeks), between 1984-1989, | 10,397                   | PTB                  | Endocervical swab;<br>2 <sup>nd</sup> trimester                                     | Culture              | Yes            |

Supporting information

| 1<br>2<br>3<br>4<br>5<br>6<br>7<br>8<br>9<br>10<br>11 | 12             | 13            | 14                                                                                                   | 15            | 16              | 17                                                             | 18                | 19              | 20 |
|-------------------------------------------------------|----------------|---------------|------------------------------------------------------------------------------------------------------|---------------|-----------------|----------------------------------------------------------------|-------------------|-----------------|----|
| 21<br>22<br>23<br>24<br>25<br>26<br>27<br>28          | 29             | 30            | 31                                                                                                   | 32            | 33              | 34                                                             | 35                | 36              | 37 |
| 38<br>39<br>40<br>41<br>42                            | 43             | 44            | 45                                                                                                   | 46            | 47              | 48                                                             | 49                | 50              | 51 |
| 52                                                    | 53             | 54            | 55                                                                                                   | 56            | 57              | 58                                                             | 59                | 60              | 61 |
| <b>First author,</b>                                  | <b>Country</b> | <b>Study</b>  | <b>Study population</b>                                                                              | <b>Total</b>  | <b>Outcomes</b> | <b>Specimen type;</b>                                          | <b>Diagnostic</b> | <b>BV</b>       |    |
| <b>publication year,</b>                              |                | <b>design</b> |                                                                                                      | <b>no. of</b> | <b>measured</b> | <b>collection time</b>                                         | <b>method</b>     | <b>assessed</b> |    |
| <b>study</b>                                          |                |               |                                                                                                      | <b>women</b>  |                 |                                                                |                   |                 |    |
| <b>reference*†</b>                                    |                |               |                                                                                                      |               |                 |                                                                |                   |                 |    |
| <b>Holst, 1994<sup>58</sup></b>                       | Sweden         | Case-control  | Women presenting in PTL; controls were women with no pregnancy history                               | 87            | PTB             | Endocervical swab; 3 <sup>rd</sup> trimester                   | Culture           | yes             |    |
| <b>Jalava, 2002<sup>69</sup></b>                      | NR             | Case-control  | Control: 3rd trimester, no signs of labour. Cases: contractions as sign of premature labour 22-35/40 | 122           | PTB             | Endocervical swab; 2 <sup>nd</sup> , 3 <sup>rd</sup> trimester | NAAT              | NR              |    |
| <b>Jones, 2009<sup>10</sup></b>                       | United Kingdom | Case-control  | Single centre, cases: <32 weeks gestation; Control >37 weeks; single centre                          | 74            | PTB, PROM       | Placenta; Post-partum                                          | NAAT              | NR              |    |
| <b>Kacerovsky, 2009<sup>70</sup></b>                  | NR             | Case-control  | Pregnancy with PPROM, single centre, Jan 2004 - Feb 2007.                                            | 450           | PROM            | Endocervical swab; 2 <sup>nd</sup> , 3 <sup>rd</sup> trimester | Culture           | NR              |    |

#### Supporting information

For peer review only - <http://bmjopen.bmj.com/site/about/guidelines.xhtml>

| 1                                  | 2              | 3            | 4                                                                              | 5    | 6                  | 7                                                         | 8       | 9   | 10 | 11 |
|------------------------------------|----------------|--------------|--------------------------------------------------------------------------------|------|--------------------|-----------------------------------------------------------|---------|-----|----|----|
| 12                                 | 13             | 14           | 15                                                                             | 16   | 17                 | 18                                                        | 19      | 20  | 21 | 22 |
| 23                                 | 24             | 25           | 26                                                                             | 27   | 28                 | 29                                                        | 30      | 31  | 32 | 33 |
| 34                                 | 35             | 36           | 37                                                                             | 38   | 39                 | 40                                                        | 41      | 42  | 43 | 44 |
| 45                                 | 46             | 47           | 48                                                                             | 49   | 50                 | 51                                                        | 52      | 53  | 54 | 55 |
| <b>Kafetzis, 2004<sup>59</sup></b> | Greece         | Case-control | Case: premature delivery; control: term delivery from June 2000 to Dec 2001    | 251  | PTB, PROM, PND     | Vaginal swab; 3 <sup>rd</sup> trimester                   | Culture | NR  |    |    |
| <b>Kataoka, 2006<sup>38</sup></b>  | Japan          | Cohort       | Singleton pregnancies at <11 weeks of gestation, single centre, Jan – Dec 2002 | 1040 | PTB, PROM, SA, PND | Vaginal swab; 1 <sup>st</sup> trimester                   | NAAT    | NR  |    |    |
| <b>Koucky, 2016<sup>39</sup></b>   | Czech Republic | Cohort       | Threatened premature deliveries, between Aug 2012 - Feb 2013                   | 63   | PTB                | Vaginal swab; 2 <sup>nd</sup> , 3 <sup>rd</sup> trimester | NAAT    | NR  |    |    |
| <b>Kumar, 2006<sup>71</sup></b>    | India          | Case-control | Women in spontaneous premature/term labour with or                             | 120  | PTB                | Vaginal swab; 3 <sup>rd</sup> trimester                   | Culture | Yes |    |    |

Supporting information

| 1<br>2<br>3<br>4<br>5<br>6<br>7<br>8<br>9<br>10<br>11<br>12 | 13<br>14<br>15<br>16 | 17<br>18<br>19<br>20<br>21 | 22<br>23<br>24<br>25<br>26<br>27<br>28<br>29<br>30                                                   | 31<br>32<br>33<br>34<br>35<br>36<br>37 | 38<br>39<br>40<br>41<br>42 | 43<br>44<br>45<br>46                       |                      |                |  |
|-------------------------------------------------------------|----------------------|----------------------------|------------------------------------------------------------------------------------------------------|----------------------------------------|----------------------------|--------------------------------------------|----------------------|----------------|--|
| First author,<br>publication year,<br>study<br>reference*†  | Country              | Study<br>design            | Study population                                                                                     | Total<br>no. of<br>women               | Outcomes<br>measured       | Specimen type;<br>collection time          | Diagnostic<br>method | BV<br>assessed |  |
|                                                             |                      |                            | without rupture of membrane,<br>single centre                                                        |                                        |                            |                                            |                      |                |  |
| <b>Kundsins, 1984<sup>75</sup></b>                          | USA                  | Cross-<br>sectional        | Deliveries at single centre,<br>between Nov 1978 - Jun 1981                                          | 801                                    | PND                        | Placenta; Post-<br>partum                  | Culture              | NR             |  |
| <b>Kwak, 2014<sup>49</sup></b>                              | South<br>Korea       | Cohort                     | Women with spontaneous<br>premature labour or preterm<br>PROM, Dec 2005 – Apr 2007,<br>single centre | 179                                    | PTB                        | Vaginal swab; 3 <sup>rd</sup><br>trimester | Culture              | NR             |  |
| <b>Lee, 2016<sup>6</sup></b>                                | South<br>Korea       | Cohort                     | Aged 15-47, delivered babies at<br>single centre between Jun 2009<br>- May 2014                      | 1,035                                  | PTB,<br>PROM,<br>SA        | Vaginal swab; NR                           | Culture              | NR             |  |

## Supporting information

For peer review only - <http://bmjopen.bmj.com/site/about/guidelines.xhtml>

| 1                                   | 2         | 3               | 4                                                                 | 5    | 6             | 7                                                              | 8       | 9  | 10 | 11 |
|-------------------------------------|-----------|-----------------|-------------------------------------------------------------------|------|---------------|----------------------------------------------------------------|---------|----|----|----|
| 12                                  | 13        | 14              | 15                                                                | 16   | 17            | 18                                                             | 19      | 20 | 21 | 22 |
| 23                                  | 24        | 25              | 26                                                                | 27   | 28            | 29                                                             | 30      | 31 | 32 | 33 |
| 34                                  | 35        | 36              | 37                                                                | 38   | 39            | 40                                                             | 41      | 42 | 43 | 44 |
| 45                                  | 46        | 47              | 48                                                                | 49   | 50            | 51                                                             | 52      | 53 | 54 | 55 |
| <b>Luton, 1994<sup>8</sup></b>      | Gabon     | Cohort          | Singleton pregnancy at <20 weeks gestation, Sept 1990 to Nov 1991 | 218  | PTB, LBW, PND | Endocervical swab; 1 <sup>st</sup> , 2 <sup>nd</sup> trimester | Culture | NR |    |    |
| <b>McCormack, 1975<sup>76</sup></b> | USA       | Cross-sectional | Vaginal deliveries, single centre,                                | 327  | LBW, PND      | Blood; post-partum                                             | Culture | NR |    |    |
| <b>McDonald, 1992<sup>60</sup></b>  | Australia | Case-control    | Women who booked at one of 4 study centres, Oct 1986 – Dec 1988   | 2190 | PTB, PROM     | Endocervical swab; 2 <sup>nd</sup> trimester                   | Culture | NR |    |    |
| <b>McDonald, 1994<sup>40</sup></b>  | Australia | Cohort          | Patients attending the antenatal clinic, Oct 1986 - May 1990      | 560  | PTB           | Endocervical swab; 2 <sup>nd</sup> , 3 <sup>rd</sup> trimester | Culture | NR |    |    |

Supporting information



| 1<br>2<br>3<br>4<br>5<br>6<br>7<br>8<br>9<br>10<br>11    | <b>First author,<br/>publication year,<br/>study<br/>reference*†</b> | <b>Country</b> | <b>Study<br/>design</b> | <b>Study population</b>                                                                             | <b>Total<br/>no. of<br/>women</b> | <b>Outcomes<br/>measured</b> | <b>Specimen type;<br/>collection time</b>                         | <b>Diagnostic<br/>method</b> | <b>BV<br/>assessed</b> |
|----------------------------------------------------------|----------------------------------------------------------------------|----------------|-------------------------|-----------------------------------------------------------------------------------------------------|-----------------------------------|------------------------------|-------------------------------------------------------------------|------------------------------|------------------------|
| 12<br>13<br>14<br>15<br>16<br>17<br>18<br>19<br>20<br>21 | <b>Menard, 2010<sup>41</sup></b>                                     | France         | Cohort                  | Admitted preterm labour with<br>no pregnancy related<br>complications from July 2007 -<br>July 2008 | 90                                | PTB                          | Vaginal swab; 2 <sup>nd</sup> ,<br>3 <sup>rd</sup> trimester      | NAAT                         | Yes                    |
| 22<br>23<br>24<br>25<br>26<br>27                         | <b>Minkoff, 1984<sup>42</sup></b>                                    | USA            | Cohort                  | Attending single centre, for<br>delivery between<br>Mar - Sept 1982                                 | 250                               | PTB,<br>PROM                 | Vaginal swab; 1 <sup>st</sup> ,<br>2 <sup>nd</sup> trimester      | Culture                      | NR                     |
| 28<br>29<br>30<br>31<br>32                               | <b>Mitsunari,<br/>2005<sup>61</sup></b>                              | Japan          | Case-<br>control        | Singleton pregnancy delivery,<br>between Jan 2002 - Sept 2003                                       | 82                                | PTB,<br>PROM                 | Endocervical swab;<br>2 <sup>nd</sup> , 3 <sup>rd</sup> trimester | NAAT                         | NR                     |
| 33<br>34<br>35<br>36<br>37<br>38<br>39<br>40<br>41<br>42 | <b>Montenegro,<br/>2019<sup>72</sup></b>                             | Colombia       | Case-<br>control        | Pregnant women >18 years, no<br>pregnancy related problems,                                         | 211                               | PTB,<br>PROM                 | Placenta; Post-<br>partum                                         | NAAT                         | NR                     |

**Supporting information**For peer review only - <http://bmjopen.bmj.com/site/about/guidelines.xhtml>

1  
2  
3  
4  
5  
6  
7  
8  
9  
10  
11  
12  
13  
14  
15  
16  
17  
18  
19  
20  
21  
22  
23  
24  
25  
26  
27  
28  
29  
30  
31  
32  
33  
34  
35  
36  
37  
38  
39  
40  
41  
42  
43  
44  
45  
46

| First author,<br>publication year,<br>study<br>reference*† | Country           | Study<br>design     | Study population                                                                                                                     | Total<br>no. of<br>women | Outcomes<br>measured | Specimen type;<br>collection time                                 | Diagnostic<br>method | BV<br>assessed |
|------------------------------------------------------------|-------------------|---------------------|--------------------------------------------------------------------------------------------------------------------------------------|--------------------------|----------------------|-------------------------------------------------------------------|----------------------|----------------|
|                                                            |                   |                     | non-smokers, no alcohol, no<br>antibiotic                                                                                            |                          |                      |                                                                   |                      |                |
| <b>Munday, 1984<sup>62</sup></b>                           | United<br>Kingdom | Case-<br>control    | Women admitted with vaginal<br>bleeding before 28 weeks<br>gestation and women attending<br>one antenatal clinic at same<br>hospital | 241                      | SA                   | Endocervical swab;<br>2 <sup>nd</sup> , 3 <sup>rd</sup> trimester | Culture              | NR             |
| <b>Nasution, 2007<sup>78</sup></b>                         | NR                | Cross-<br>sectional | Women admitted with preterm<br>PROM (<37weeks), normal<br>vaginal deliveries at term, and<br>women with post-partum fever            | 120                      | PROM                 | Placenta; Post-<br>partum                                         | NAAT                 | NR             |

| 1<br>2<br>3<br>4<br>5<br>6<br>7<br>8<br>9<br>10<br>11          | 12              | 13               | 14                                                                                                                   | 15            | 16                   | 17                                                                                  | 18                | 19              | 20 |
|----------------------------------------------------------------|-----------------|------------------|----------------------------------------------------------------------------------------------------------------------|---------------|----------------------|-------------------------------------------------------------------------------------|-------------------|-----------------|----|
| 21<br>22<br>23<br>24<br>25<br>26<br>27                         | 28              | 29               | 30                                                                                                                   | 31            | 32                   | 33                                                                                  | 34                | 35              | 36 |
| 37<br>38<br>39<br>40<br>41<br>42                               | 43              | 44               | 45                                                                                                                   | 46            | 47                   | 48                                                                                  | 49                | 50              | 51 |
| 52<br>53<br>54<br>55<br>56<br>57<br>58<br>59<br>60<br>61<br>62 | 63              | 64               | 65                                                                                                                   | 66            | 67                   | 68                                                                                  | 69                | 70              | 71 |
| <b>First author,</b>                                           | <b>Country</b>  | <b>Study</b>     | <b>Study population</b>                                                                                              | <b>Total</b>  | <b>Outcomes</b>      | <b>Specimen type;</b>                                                               | <b>Diagnostic</b> | <b>BV</b>       |    |
| <b>publication year,</b>                                       |                 | <b>design</b>    |                                                                                                                      | <b>no. of</b> | <b>measured</b>      | <b>collection time</b>                                                              | <b>method</b>     | <b>assessed</b> |    |
| <b>study</b>                                                   |                 |                  |                                                                                                                      | <b>women</b>  |                      |                                                                                     |                   |                 |    |
| <b>reference*†</b>                                             |                 |                  |                                                                                                                      |               |                      |                                                                                     |                   |                 |    |
| <b>Nguyen, 2004<sup>43</sup></b>                               | Switzerland     | Cohort           | Women with transabdominal<br>amniocentesis at 15-17 weeks<br>gestation, single centre                                | 456           | PTB,<br>PROM,<br>PND | Amniotic fluid; 2 <sup>nd</sup><br>trimester                                        | NAAT              | NR              |    |
| <b>Odendaal, 2002<sup>50</sup></b>                             | South<br>Africa | Cohort           | Primigravid, first visit, 16-26<br>weeks with previous preterm<br>labour or miscarriage, May-Dec<br>1996             | 395           | PTB, SA,<br>PND      | Endocervical swab;<br>2 <sup>nd</sup> trimester                                     | Culture           | Yes             |    |
| <b>Oliveira, 2020<sup>7</sup></b>                              | Brazil          | Case-<br>control | > 18 years old, cases: 8 -20<br>weeks gestation; Control<br>vaginal delivery at 38-40 weeks,<br>Jul 2017 – Aug 2018, | 109           | SA                   | Endocervical swab;<br>1 <sup>st</sup> , 2 <sup>nd</sup> , 3 <sup>rd</sup> trimester | NAAT              | NR              |    |

## Supporting information

For peer review only - <http://bmjopen.bmj.com/site/about/guidelines.xhtml>

1  
2  
3  
4  
5  
6  
7  
8  
9  
10  
11  
12  
13  
14  
15  
16  
17  
18  
19  
20  
21  
22  
23  
24  
25  
26  
27  
28  
29  
30  
31  
32  
33  
34  
35  
36  
37  
38  
39  
40  
41  
42  
43  
44  
45  
46

| First author,<br>publication year,<br>study<br>reference*† | Country                | Study<br>design  | Study population                                                                                            | Total<br>no. of<br>women | Outcomes<br>measured | Specimen type;<br>collection time                                              | Diagnostic<br>method | BV<br>assessed |
|------------------------------------------------------------|------------------------|------------------|-------------------------------------------------------------------------------------------------------------|--------------------------|----------------------|--------------------------------------------------------------------------------|----------------------|----------------|
| Payne, 2014 <sup>63</sup>                                  | China and<br>Australia | Case-<br>control | Singleton pregnancy referred for<br>genetic amniocentesis                                                   | 972                      | PTB                  | Amniotic fluid; 2 <sup>nd</sup><br>trimester                                   | NAAT                 | NR             |
| Payne, 2016 <sup>44</sup>                                  | Australia              | Cohort           | Low risk singleton pregnancy,<br>18-40 years old, at 1st or 2nd<br>trimester when enrolled                  | 191                      | PTB                  | Vaginal swab; 1 <sup>st</sup> ,<br>2 <sup>nd</sup> , 3 <sup>rd</sup> trimester | NAAT,<br>Culture     | NR             |
| Payne, 2021 <sup>45</sup>                                  | Australia              | Cohort           | Nulliparous and multiparous,<br>singleton pregnancy, ≥16 years<br>between 12 - 23 weeks gestation           | 1000                     | PTB                  | Vaginal swab; 1 <sup>st</sup> ,<br>2 <sup>nd</sup> trimester                   | NAAT                 | NR             |
| Peretz, 2020 <sup>12</sup>                                 | Israel                 | Cohort           | Women, 18-45 years, at any<br>stage of labor and any mode of<br>delivery, between Jun 2014 and<br>Jan 2016. | 214                      | PTB,<br>LBW          | Vaginal swab; post-<br>partum                                                  | NAAT                 | NR             |

Supporting information

| 1<br>2<br>3<br>4<br>5<br>6<br>7<br>8<br>9<br>10<br>11    | <b>First author,<br/>publication year,<br/>study<br/>reference*†</b> | <b>Country</b> | <b>Study<br/>design</b> | <b>Study population</b>                                                                                       | <b>Total<br/>no. of<br/>women</b> | <b>Outcomes<br/>measured</b> | <b>Specimen type;<br/>collection time</b>                         | <b>Diagnostic<br/>method</b> | <b>BV<br/>assessed</b> |
|----------------------------------------------------------|----------------------------------------------------------------------|----------------|-------------------------|---------------------------------------------------------------------------------------------------------------|-----------------------------------|------------------------------|-------------------------------------------------------------------|------------------------------|------------------------|
| 12<br>13<br>14<br>15<br>16<br>17<br>18<br>19<br>20       | <b>Perni, 2004<sup>51</sup></b>                                      | Unknown        | Cohort                  | Singleton pregnancy: underwent<br>transabdominal amniocentesis at<br>15-19 weeks with clear amniotic<br>fluid | 193                               | PTB,<br>PROM                 | Amniotic fluid; 2 <sup>nd</sup><br>trimester                      | NAAT                         | NR                     |
| 21<br>22<br>23<br>24<br>25<br>26<br>27                   | <b>Povlsen, 2001<sup>64</sup></b>                                    | Denmark        | Case-<br>control        | Singleton, single centre;<br>attending first antenatal visit<br>between Nov 1992 - Feb 1994                   | 484                               | PTB,<br>LBW                  | Endocervical swab;<br>1 <sup>st</sup> , 2 <sup>nd</sup> trimester | NAAT                         | Yes                    |
| 28<br>29<br>30<br>31<br>32<br>33<br>34<br>35<br>36<br>37 | <b>Rittenschober-<br/>Böhm, 2018<sup>46</sup></b>                    | Austria        | Cohort                  | Attending routine nuchal<br>translucency screening between<br>12-14 weeks gestation,<br>multicentre study     | 4330                              | PTB                          | Endocervical swab;<br>1 <sup>st</sup> , 2 <sup>nd</sup> trimester | NAAT                         | Yes                    |

#### Supporting information

For peer review only - <http://bmjopen.bmj.com/site/about/guidelines.xhtml>

| 1<br>2<br>3                        | 4              | 5               | 6                                                                                                 | 7             | 8               | 9                                       | 10                | 11              | 12 |
|------------------------------------|----------------|-----------------|---------------------------------------------------------------------------------------------------|---------------|-----------------|-----------------------------------------|-------------------|-----------------|----|
| 13                                 | 14             | 15              | 16                                                                                                | 17            | 18              | 19                                      | 20                | 21              | 22 |
| 23                                 | 24             | 25              | 26                                                                                                | 27            | 28              | 29                                      | 30                | 31              | 32 |
| 33                                 | 34             | 35              | 36                                                                                                | 37            | 38              | 39                                      | 40                | 41              | 42 |
| 43                                 | 44             | 45              | 46                                                                                                | 47            | 48              | 49                                      | 50                | 51              | 52 |
| <b>First author,</b>               | <b>Country</b> | <b>Study</b>    | <b>Study population</b>                                                                           | <b>Total</b>  | <b>Outcomes</b> | <b>Specimen type;</b>                   | <b>Diagnostic</b> | <b>BV</b>       |    |
| <b>publication year,</b>           |                | <b>design</b>   |                                                                                                   | <b>no. of</b> | <b>measured</b> | <b>collection time</b>                  | <b>method</b>     | <b>assessed</b> |    |
| <b>study</b>                       |                |                 |                                                                                                   | <b>women</b>  |                 |                                         |                   |                 |    |
| <b>reference*†</b>                 |                |                 |                                                                                                   |               |                 |                                         |                   |                 |    |
| <b>Schwab, 2015<sup>52</sup></b>   | Indonesia      | Cohort          | 2nd trimester, four centres, from Feb -Jun 2005                                                   | 159           | PTB             | Vaginal swab; 2 <sup>nd</sup> trimester | NAAT              | Yes             |    |
| <b>Sperling, 1988<sup>48</sup></b> | USA            | Cohort          | Clinical diagnosis of intraamniotic infection, July 1979 – Dec 1986                               | 409           | LBW             | Amniotic fluid; NR                      | Culture           | NR              |    |
| <b>Sweeney, 2016<sup>77</sup></b>  | USA            | Cross-sectional | Term deliveries, no HIV infection, congenital infection, or fetal malformation, Jul 2010–Apr 2013 | 535           | PTB             | Placenta; Post-partum                   | NAAT, Culture     | NR              |    |
| <b>Toth, 1992<sup>65</sup></b>     | UK             | Case-control    | Admitted for delivery between Jan 1985 - Dec 1986                                                 | 100           | PTB             | Endocervical swab; NR                   | Culture           | NR              |    |

Supporting information

| First author,<br>publication year,<br>study<br>reference*† | Country        | Study<br>design  | Study population                                                               | Total<br>no. of<br>women | Outcomes<br>measured | Specimen type;<br>collection time                                 | Diagnostic<br>method | BV<br>assessed |
|------------------------------------------------------------|----------------|------------------|--------------------------------------------------------------------------------|--------------------------|----------------------|-------------------------------------------------------------------|----------------------|----------------|
| Usui, 2002 <sup>47</sup>                                   | Japan          | Cohort           | Singleton pregnancy attending<br>first antenatal visit,<br>Jan 1995 – Mar 1998 | 1958                     | PTB                  | Endocervical swab;<br>1 <sup>st</sup> , 3 <sup>rd</sup> trimester | Culture              | NR             |
| Yoon, 2001 <sup>66</sup>                                   | South<br>Korea | Case-<br>control | Women who underwent mid-<br>trimester amniocentesis                            | 114                      | PTB,<br>PROM         | Amniotic fluid; 2 <sup>nd</sup><br>trimester                      | NAAT                 | NR             |

**Abbreviations:** LBW, infant low birth weight, defined as birth weight <2.5kg; NAAT, nucleic acid amplification tests; NR, not reported; PTB, preterm birth - defined as birth before 37 weeks gestation; PROM: premature rupture of membrane- defined as clinically confirmed rupture of membrane before 37weeks of gestation; PND, perinatal death- defined as stillbirth (death after 20/40 gestation) or neonatal death (death <28 day since birth), unless otherwise defined by the study authors; SA: spontaneous abortion - defined as pregnancy loss at <20 weeks gestation or as defined by author

USA, United States of America; UK, United Kingdom.

\* Study reference is the reference number cited in the main manuscript

† Additional summary information about the characteristics of included studies in Tables S3.1-S3.3, S4.1-S4.3, S5.1-S5.3

### Supporting information

For peer review only - <http://bmjopen.bmj.com/site/about/guidelines.xhtml>

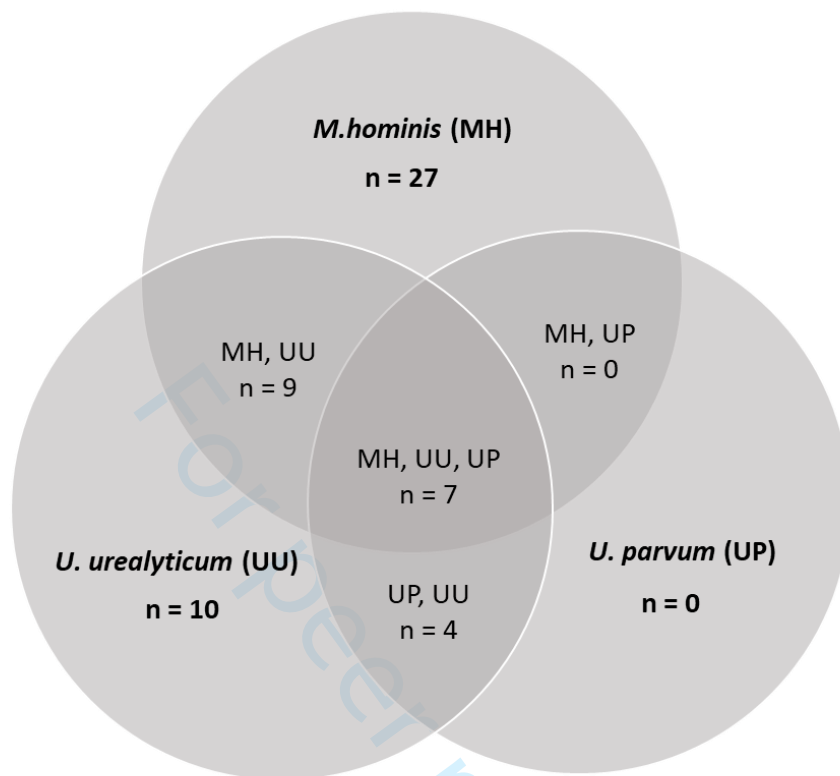

**Figure S2** Venn diagram showing organisms reported in in the 57 articles included in the systematic review.



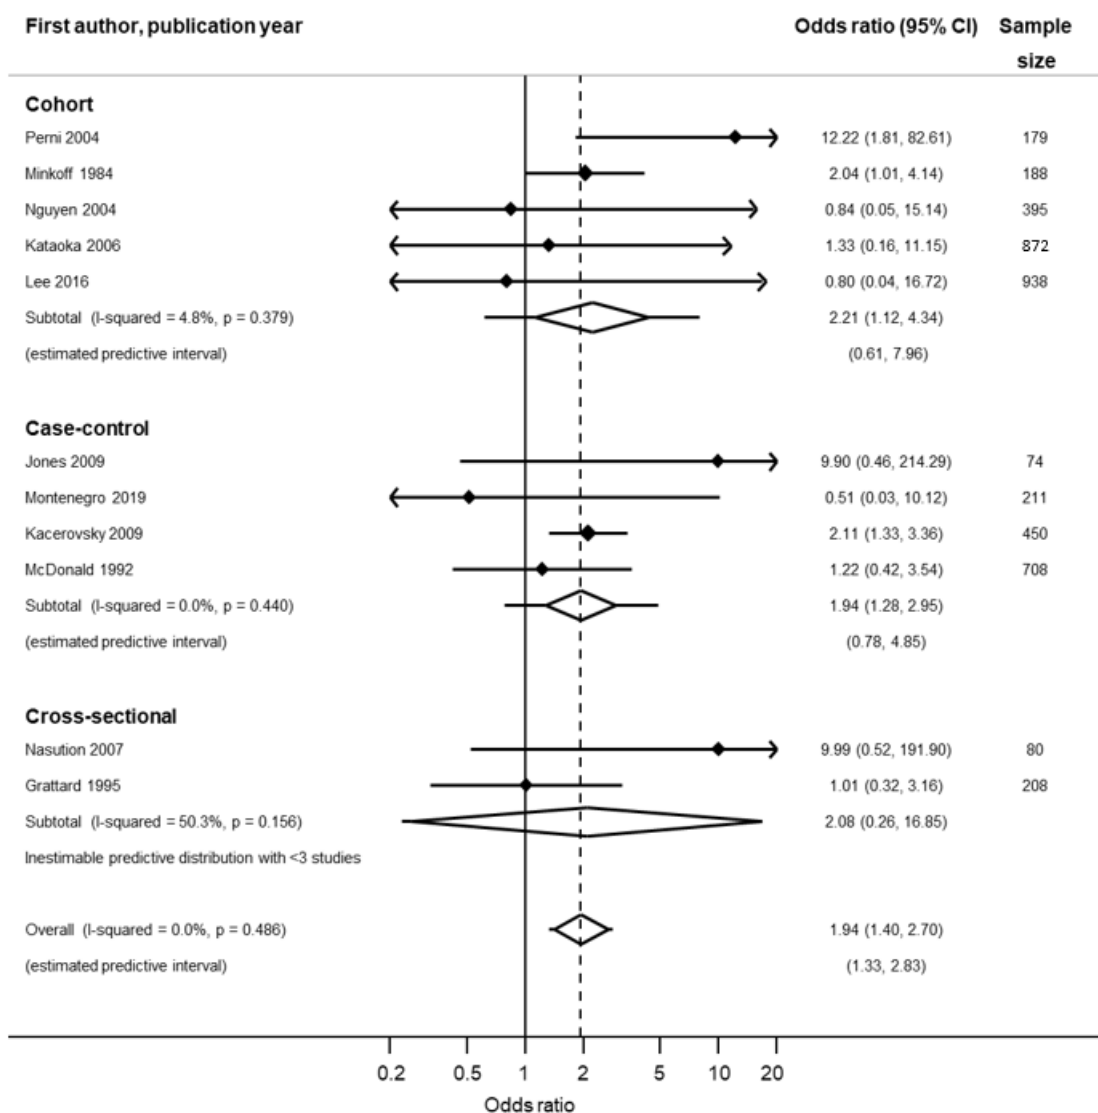

**Figure S3.1** Forest plot of association between *M. hominis* and premature rupture of membrane, random effects model.

Solid diamond shows the point estimate and study weight. Solid line shows 95% confidence intervals (CI) for each study. The open diamond shows the point estimate and 95% CI of the summary estimate. Solid lines extending from the diamond show the prediction interval.

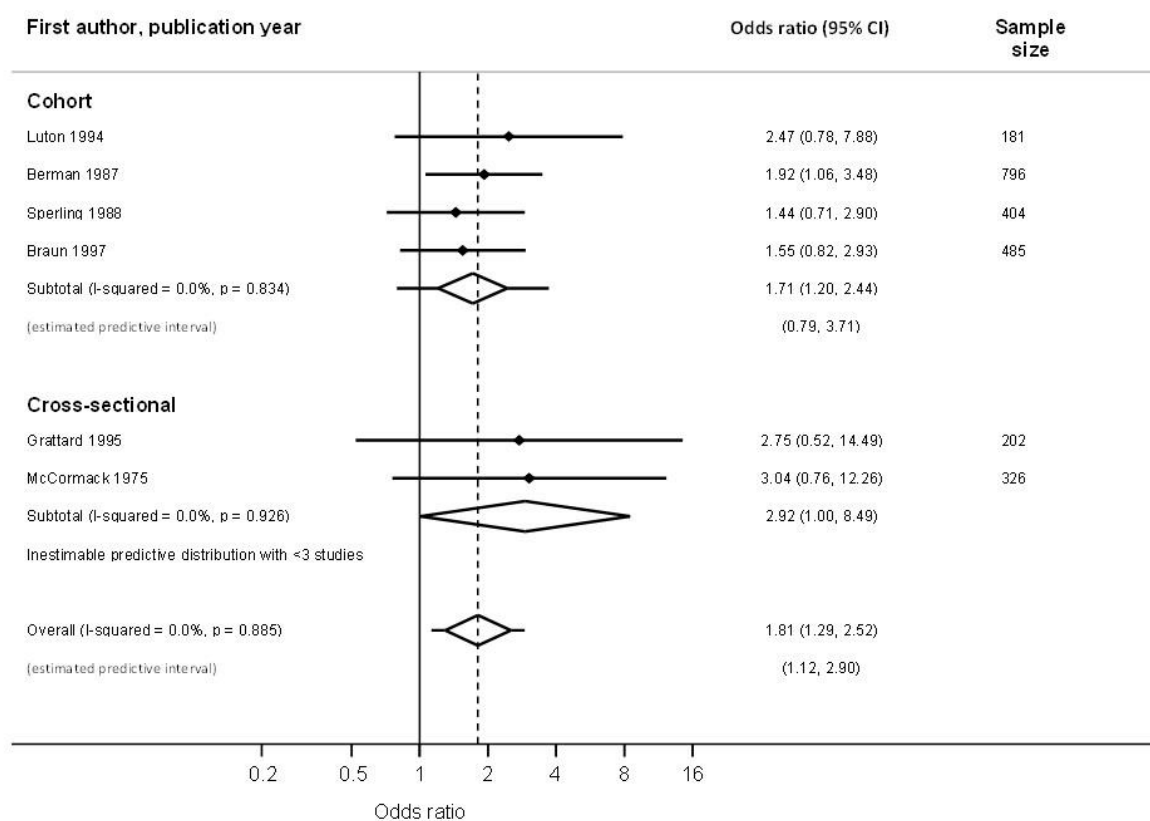

**Figure S3.2** Forest plot of association between *M. hominis* and low birthweight, random effects model.

Solid diamond shows the point estimate and study weight. Solid line shows 95% confidence intervals (CI) for each study. The open diamond shows the point estimate and 95% CI of the summary estimate. Solid lines extending from the diamond show the prediction interval.

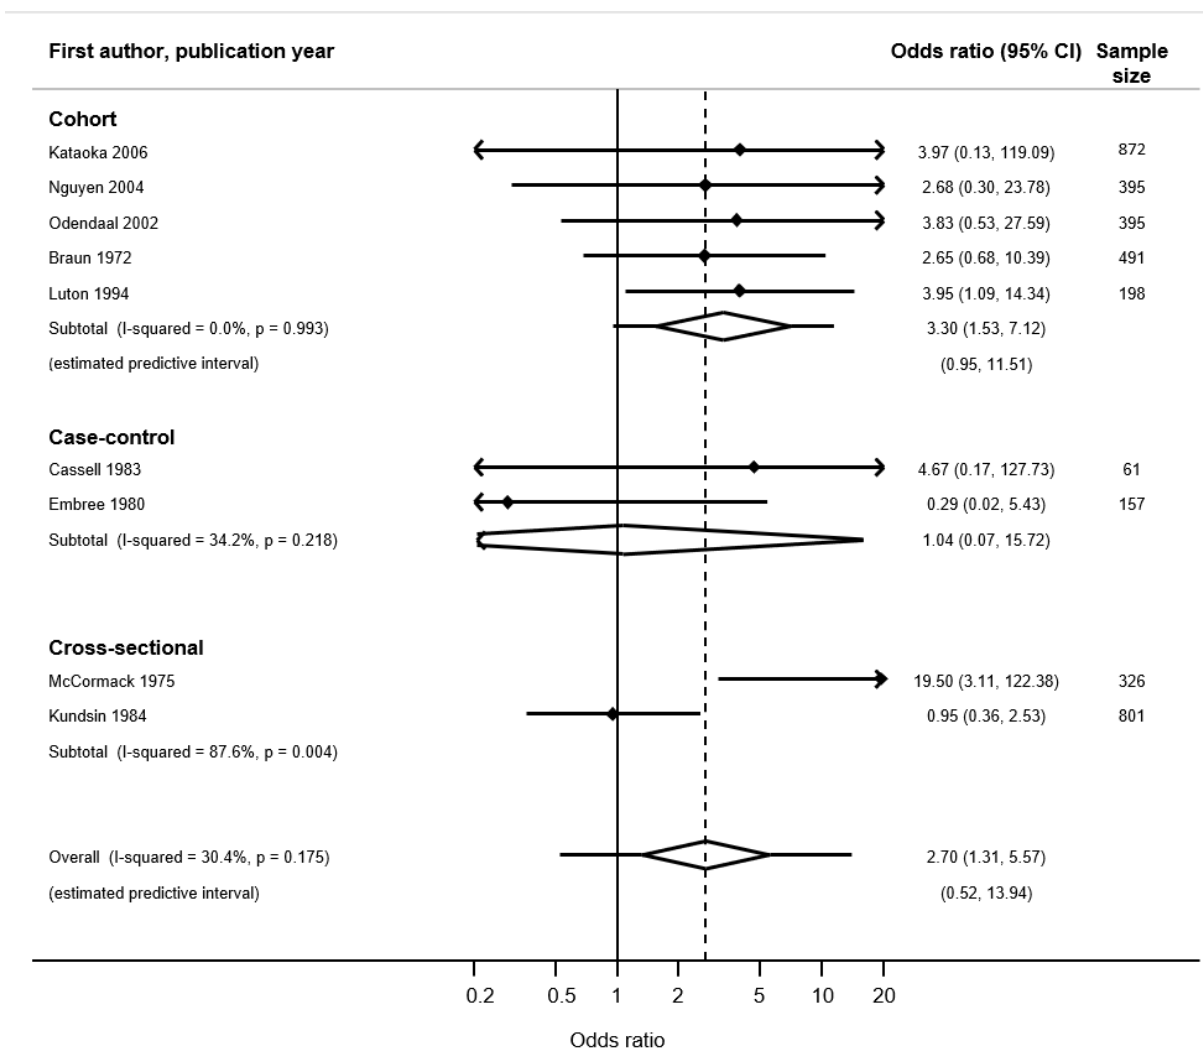

**Figure S3.3** Forest plot of association between *M. hominis* and perinatal death random effects model.

Solid diamond shows the point estimate and study weight. Solid line shows 95% confidence intervals (CI) for each study. The open diamond shows the point estimate and 95% CI of the summary estimate. Solid lines extending from the diamond show the prediction interval.



**Figure S3.4** Forest plot of association between *M. hominis* and spontaneous abortion random effects model.

Solid diamond shows the point estimate and study weight. Solid line shows 95% confidence intervals (CI) for each study. The open diamond shows the point estimate and 95% CI of the summary estimate. Solid lines extending from the diamond show the prediction interval.

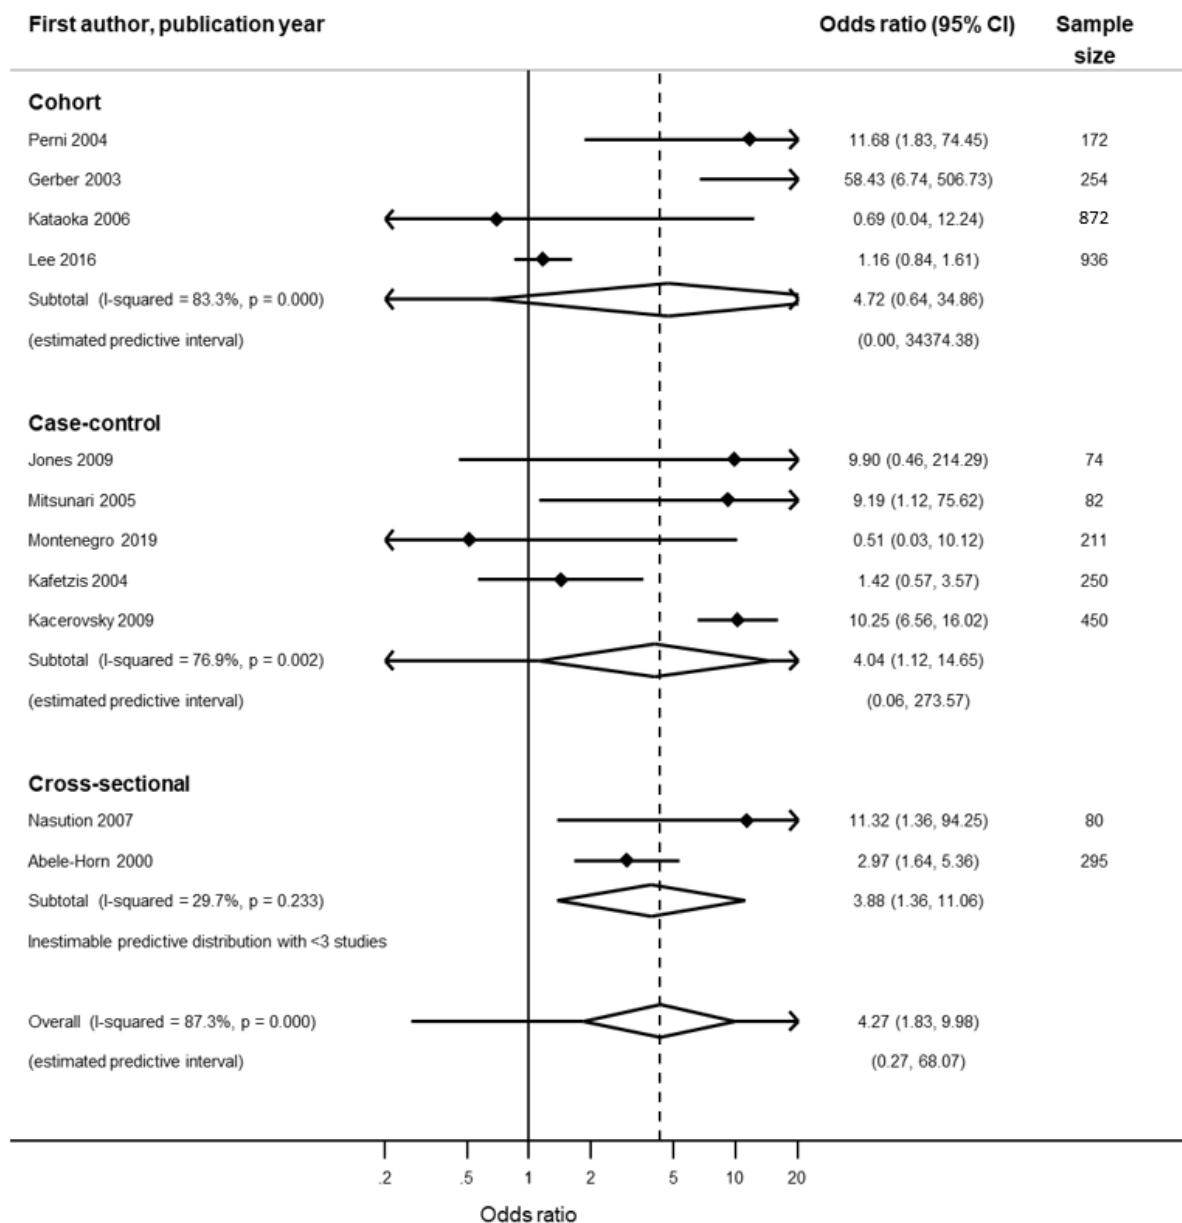

**Figure S4.1** Forest plot of association between *U. urealyticum* and premature rupture of membrane, random effects model.

Solid diamond shows the point estimate and study weight. Solid line shows 95% confidence intervals (CI) for each study. The open diamond shows the point estimate and 95% CI of the summary estimate. Solid lines extending from the diamond show the prediction interval.

**Supporting information**

For peer review only - <http://bmjopen.bmj.com/site/about/guidelines.xhtml>

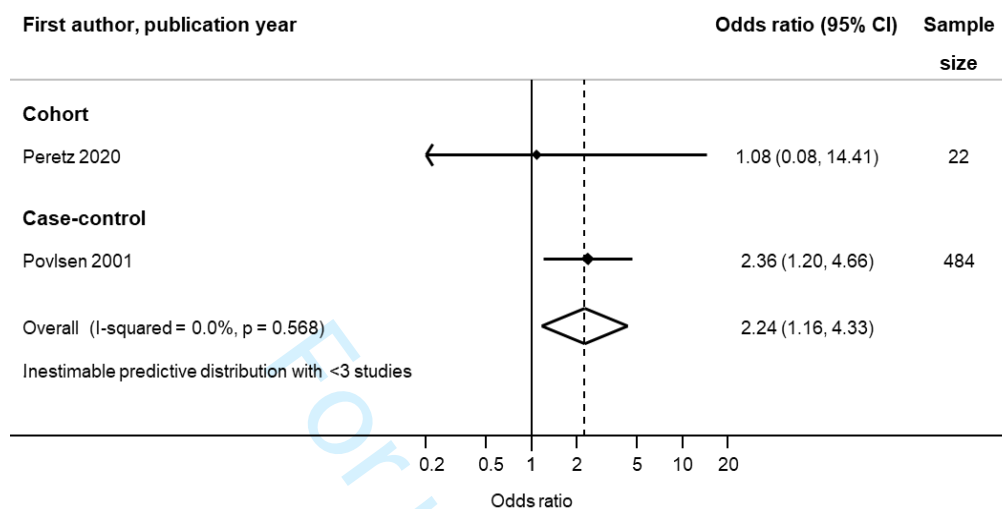

**Figure S4.2** Forest plot of association between *U. urealyticum* and low birth weight, random effects model.

Solid diamond shows the point estimate and study weight. Solid line shows 95% confidence intervals (CI) for each study. The open diamond shows the point estimate and 95% CI of the summary estimate. Solid lines extending from the diamond show the prediction interval.

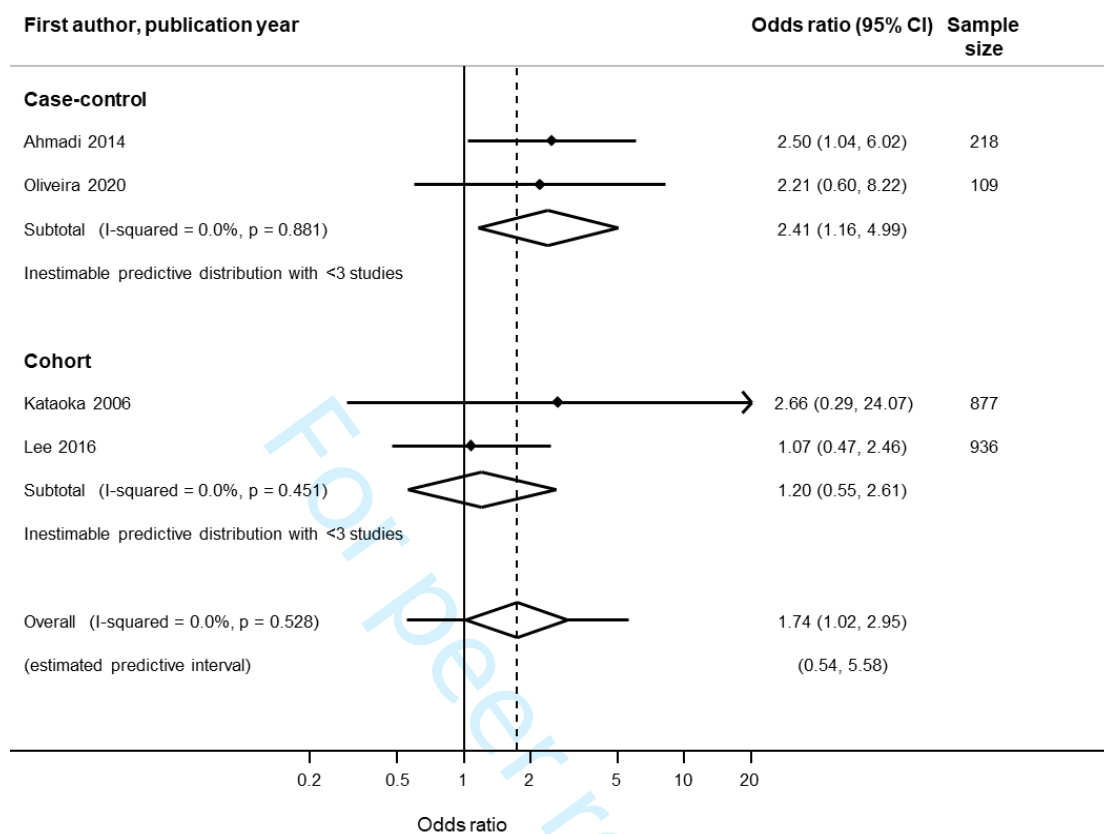

**Figure S4.3** Forest plot of association between *U. urealyticum* and spontaneous abortion, random effects model

Solid diamond shows the point estimate and study weight. Solid line shows 95% confidence intervals (CI) for each study. The open diamond shows the point estimate and 95% CI of the summary estimate. Solid lines extending from the diamond show the prediction interval.

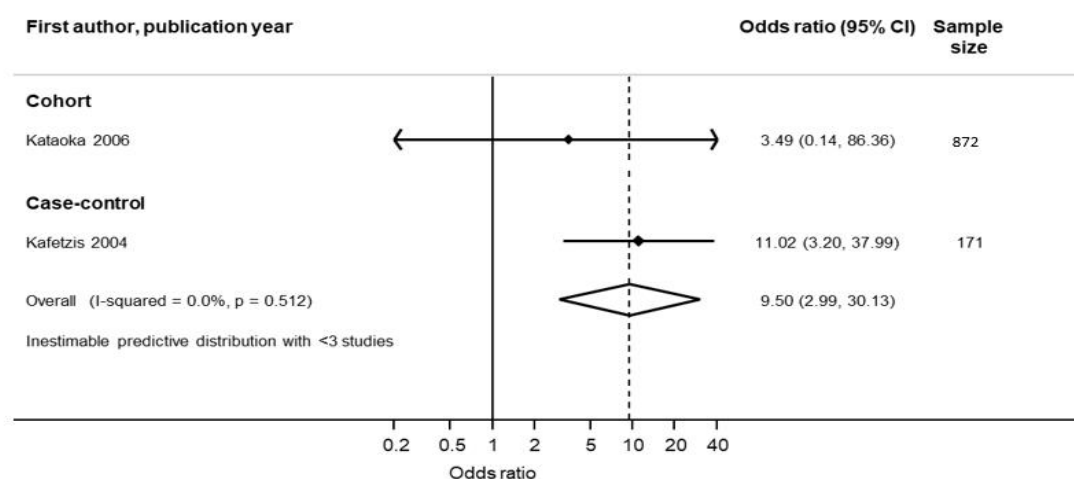

21  
22  
23  
24  
25  
26  
27  
28  
29  
30  
31  
32  
33  
34  
35  
36  
37  
38  
39  
40  
41  
42  
43  
44  
45  
46  
47  
48  
49  
50  
51  
52  
53  
54  
55  
56  
57  
58  
59  
60

**Figure S4.4** Forest plot of association between *U. urealyticum* and perinatal death, random effects model. Solid diamond shows the point estimate and study weight. Solid line shows 95% confidence intervals (CI) for each study. The open diamond shows the point estimate and 95% CI of the summary estimate. Solid lines extending from the diamond show the prediction interval.





**Figure S5.1** Forest plot of association between *U. parvum* and premature rupture of membrane, random effects model.

Solid diamond shows the point estimate and study weight. Solid line shows 95% confidence intervals (CI) for each study. The open diamond shows the point estimate and 95% CI of the summary estimate. Solid lines extending from the diamond show the prediction interval.

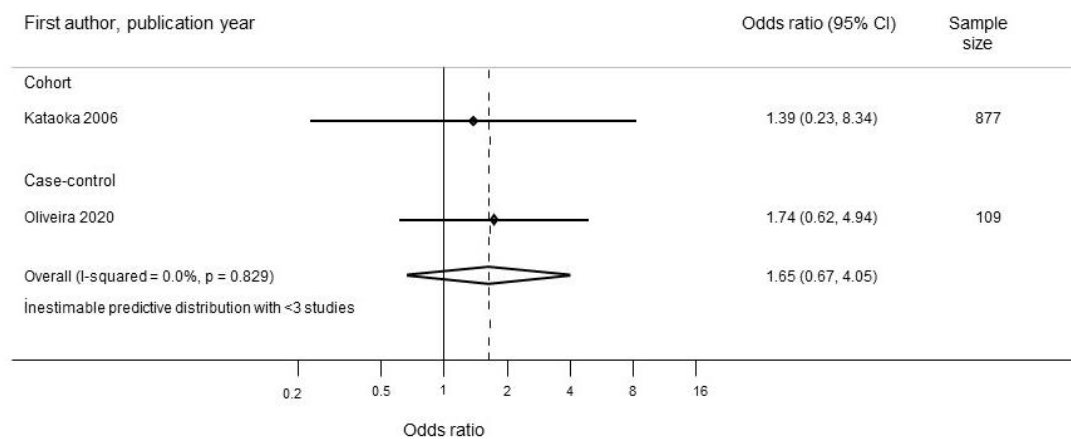

**Figure S5.2** Forest plot of association between *U. parvum* and spontaneous abortion random effects model

Solid diamond shows the point estimate and study weight. Solid line shows 95% confidence intervals (CI) for each study. The open diamond shows the point estimate and 95% CI of the summary estimate. Solid lines extending from the diamond show the prediction interval.

**Table S2.1** Descriptive tables: Cohort studies (n=26)

| First author,<br>publication<br>year | Organism<br>reported | Outcomes | Definition<br>Provided | OR/ RR (95% CI) reported in by study authors |                      |                                                                                                                                                                                 |
|--------------------------------------|----------------------|----------|------------------------|----------------------------------------------|----------------------|---------------------------------------------------------------------------------------------------------------------------------------------------------------------------------|
|                                      |                      |          |                        | Organism_<br>outcome                         | Unadjusted, OR       | Adjusted, aOR                                                                                                                                                                   |
| Agger, 2014                          | MH, UU, UP           | PTB      | Born < 37 weeks        | MH_PTB                                       | OR 1.72 (0.91, 3.28) | 'Final model... factors... from preliminary models with p>0.15.' No organism in final multivariable model for PTB <37 weeks. MH in final model PTB< 35 weeks, aOR 3.6 (1.4-9.7) |
|                                      |                      |          |                        | UU_PTB                                       | OR 1.64 (0.67, 4.05) |                                                                                                                                                                                 |
|                                      |                      |          |                        | UP_PTB                                       | OR 1.23 (0.7, 2.15)  |                                                                                                                                                                                 |
| Berman, 1987                         | MH                   | LBW      | <2.5kg                 | MH_LBW                                       | RR 1.8 (1.0-3.1)     | Birth weight as continuous variable, p=0.01, adjusted for parity, maternal height, weight, marital status, age, enrolment, gestation, <i>C. trachomatis</i>                     |
| Braun, 1971                          | MH                   | LBW      | <2.5kg                 |                                              |                      | No multivariable analysis                                                                                                                                                       |
|                                      |                      | SA       | Not defined            | NR                                           |                      |                                                                                                                                                                                 |
|                                      |                      | PND      | Not defined            |                                              |                      |                                                                                                                                                                                 |
| Donders, 2009                        | MH                   | PTB      | Born < 37 weeks        | MH_PTB                                       | OR 8.5 (2.8, 25.5)   | No multivariable analysis                                                                                                                                                       |
|                                      |                      | SA       | **                     |                                              |                      |                                                                                                                                                                                 |

**Supporting information**For peer review only - <http://bmjopen.bmj.com/site/about/guidelines.xhtml>

1  
2  
3  
4  
5  
6  
7  
8  
9  
10  
11  
12  
13  
14  
15  
16  
17  
18  
19  
20  
21  
22  
23  
24  
25  
26  
27  
28  
29  
30  
31  
32  
33  
34  
35  
36  
37  
38  
39  
40  
41  
42  
43  
44  
45  
46

| First author, publication year | Organism reported | Outcomes                    | Definition Provided                       | OR/ RR (95% CI) reported in by study authors |                                                                                                              |
|--------------------------------|-------------------|-----------------------------|-------------------------------------------|----------------------------------------------|--------------------------------------------------------------------------------------------------------------|
|                                |                   |                             |                                           | Organism_ Unadjusted, OR outcome             | Adjusted, aOR                                                                                                |
| Gerber, 2003                   | UU                | PTB<br>PROM                 | Born < 37 weeks<br>†                      | NR                                           | No multivariable analysis                                                                                    |
| Govender, 2009                 | MH, UU, UP        | PTB                         | Born < 37 weeks                           | NR                                           | No multivariable analysis                                                                                    |
| Harrison, 1983                 | MH                | SA                          | **                                        | NR                                           | No multivariable analysis                                                                                    |
| Hillier, 1995                  | MH                | PTB                         | Born < 37 weeks                           | MH_PTB                                       | No multivariable analysis                                                                                    |
| Kataoka, 2006                  | MH, UU, UP        | PTB,<br>PROM,<br>SA,<br>PND | Born < 37 weeks<br>Not defined<br>**<br>∞ | NR                                           | No multivariable analysis                                                                                    |
| Koucky, 2016                   | UU                | PTB                         | Born < 37 weeks                           | NR                                           | aOR 3.4 (1.3, 5.5)<br><br>Adjusted for progesterone treatment, other factors not reported 5.46 (1.80, 16.62) |

Supporting information

| First author,<br>publication<br>year | Organism<br>reported | Outcomes | Definition<br>Provided | OR/ RR (95% CI) reported in by study authors |                                                    |
|--------------------------------------|----------------------|----------|------------------------|----------------------------------------------|----------------------------------------------------|
|                                      |                      |          |                        | Organism_<br>outcome                         | Unadjusted, OR<br>Adjusted, aOR                    |
| Kwak, 2014                           | MH, UU               | PTB      | Born < 37 weeks        | NR                                           | No multivariable analysis                          |
| Lee, 2016                            | MH, UU               | PTB      | Born < 37 weeks        | NR                                           | No multivariable analysis                          |
|                                      |                      | PROM     | Not defined            |                                              |                                                    |
|                                      |                      | SA       | **                     |                                              |                                                    |
| Luton, 1994                          | MH                   | PTB      | Born < 37 weeks        | NR                                           | No multivariable analysis                          |
|                                      |                      | LBW      | <2.5kg                 |                                              |                                                    |
|                                      |                      | PND      | ∞                      |                                              |                                                    |
| McDonald,<br>1994                    | MH                   | PTB      | Born < 37 weeks        | NR                                           | No multivariable analysis                          |
| Menard, 2010                         | MH                   | PTB      | Born < 37 weeks        | NR                                           | No multivariable analysis                          |
| Minkoff, 1984                        | MH                   | PTB      | Born < 37 weeks        | NR                                           | Stepwise multiple logistic regression. Results for |
|                                      |                      | PROM     | †                      |                                              | MH not reported for either outcome                 |

## Supporting information

For peer review only - <http://bmjopen.bmj.com/site/about/guidelines.xhtml>

| First author, publication year | Organism reported | Outcomes | Definition Provided | OR/ RR (95% CI) reported in by study authors |                    |                           |
|--------------------------------|-------------------|----------|---------------------|----------------------------------------------|--------------------|---------------------------|
|                                |                   |          |                     | Organism_ outcome                            | Unadjusted, OR     | Adjusted, aOR             |
| Nguyen, 2004                   | MH                | PTB      | Born < 37 weeks     | MH_PTB                                       | RR 4.6 (1.7, 12.8) | No multivariable analysis |
|                                |                   | PROM     | †                   |                                              |                    |                           |
|                                |                   | PND      | Not defined         |                                              |                    |                           |
| Odendaal, 2002                 | MH                | PTB      | Born < 37 weeks     | NR                                           |                    | No multivariable analysis |
|                                |                   | SA,      | **                  |                                              |                    |                           |
|                                |                   | PND      | Not defined         |                                              |                    |                           |
| Payne, 2016                    | MH, UU, UP        | PTB      | Born < 37 weeks     | NR                                           |                    | No multivariable analysis |
| Payne, 2020                    | MH, UU, UP        | PTB      | Born < 37 weeks     | NR                                           |                    | No multivariable analysis |
| Peretz, 2020                   | UU, UP            | PTB,     | Born < 37 weeks     | NR                                           |                    | No multivariable analysis |
|                                |                   | LBW      | <2.5kg              |                                              |                    |                           |
| Perni, 2004                    | MH, UU            | PTB,     | Born < 37 weeks     | NR                                           |                    | No multivariable analysis |
|                                |                   | PROM     | †                   |                                              |                    |                           |

## Supporting information

For peer review only - <http://bmjopen.bmj.com/site/about/guidelines.xhtml>

| First author,<br>publication<br>year | Organism<br>reported | Outcomes | Definition<br>Provided | OR/ RR (95% CI) reported in by study authors |                                     |                                                                                                                             |
|--------------------------------------|----------------------|----------|------------------------|----------------------------------------------|-------------------------------------|-----------------------------------------------------------------------------------------------------------------------------|
|                                      |                      |          |                        | Organism_<br>outcome                         | Unadjusted, OR                      | Adjusted, aOR                                                                                                               |
| Rittenschober-<br>Bohm, 2018         | UU,<br>UP            | PTB      | Born < 37 weeks        | UU_PTB                                       | OR 1.4 (0.9, 2.3)                   | aOR 1.4 (0.8, 2.2)                                                                                                          |
|                                      |                      |          |                        | UP_PTB                                       | OR 1.7 (1.3, 2.2)                   | aOR 1.6 (1.2, 2.1)                                                                                                          |
|                                      |                      |          |                        |                                              |                                     | Adjusted for age, smoking, history of PTB, BV,<br>smoking UU or UP                                                          |
| Schwab, 2015                         | MH, UU               | PTB      | Born < 37 weeks        | MH_PTB                                       | OR 0.26 (0.03, 1.13)                | No multivariable analysis                                                                                                   |
|                                      |                      |          |                        | UU_PTB                                       | OR 0.52 (0.15, 1.57)                |                                                                                                                             |
| Sperling, 1988                       | MH,                  | LBW      | <2.5kg                 | NR                                           |                                     | No multivariable analysis                                                                                                   |
| Usui, 2002                           | MH, UU               | PTB      | Born < 37 weeks        | NR                                           | OR not reported by study<br>authors | aOR 1.5 (0.8, 2.7)<br>Adjusted for <i>Lactobacillus</i> spp., <i>E. coli</i> , glucose<br>non-fermenting Gram negative rods |

**Abbreviations** LBW: low birth weight, defined as birth weight <2.5kg; NAAT, nucleic acid amplification tests; NR, not reported; MH, *M. hominis*; PND, perinatal mortality; PROM, premature rupture of membrane; PTB, preterm birth; SA: spontaneous abortion; UP, *U. parvum*; UU, *U. urealyticum*;

### Supporting information

For peer review only - <http://bmjopen.bmj.com/site/about/guidelines.xhtml>

1  
2  
3 \*\*SA defined as pregnancy loss at <20 weeks gestation or as defined by author; †PROM defined as rupture of membrane before 37 completed weeks or as  
4  
5 defined by author; ∞ Perinatal death, defined as birth after 20 weeks gestation (stillbirth) or death within 28 days after birth (neonatal death) unless otherwise  
6  
7 defined by the study authors.  
8  
9  
10  
11  
12  
13  
14  
15  
16  
17  
18  
19  
20  
21  
22  
23  
24  
25  
26  
27  
28  
29  
30  
31  
32  
33  
34  
35  
36  
37  
38  
39  
40  
41  
42

For peer review only



**Table S2.2** Descriptive tables: Case control studies (n=25)

| First author,<br>publication<br>year | Organism<br>reported | Outcome | Definition<br>Provided | OR/ RR (95% CI) reported by study<br>authors |                      |                           |
|--------------------------------------|----------------------|---------|------------------------|----------------------------------------------|----------------------|---------------------------|
|                                      |                      |         |                        | Organism<br>outcome                          | Unadjusted, OR       | Adjusted, aOR             |
| Ahmadi, 2014                         | UU                   | SA      | **                     | NR                                           |                      | No multivariable analysis |
| Bosquet, 2006                        | MH                   | PTB     | Born < 37 weeks        | NR                                           |                      | No multivariable analysis |
| Cassell, 1983                        | MH                   | PTB     | Born < 37 weeks        | NR                                           |                      | No multivariable analysis |
|                                      |                      | PND     | ∞                      |                                              |                      |                           |
| Chua, 1999                           | MH                   | PTB     | Born < 37 weeks        | NR                                           |                      | No multivariable analysis |
| Daskalakis,<br>2009,                 | MH, UU               | PTB     | Born < 37 weeks        | NR                                           |                      | No multivariable analysis |
| Embree, 1980                         | MH                   | SA      | Not defined            | NR                                           |                      | No multivariable analysis |
|                                      |                      | PND     | Partially defined      |                                              |                      |                           |
| arhadifar, 2017                      | MH                   | SA      | **                     | MH_SA                                        | OR 0.49 (0.08, 2.73) | No multivariable analysis |
| Freitas, 2018                        | UU, UP               | PTB     | Born < 37 weeks        | NR                                           |                      | No multivariable analysis |

**Supporting information**For peer review only - <http://bmjopen.bmj.com/site/about/guidelines.xhtml>

| First author,<br>publication<br>year | Organism<br>reported | Outcome            | Definition<br>Provided              | OR/ RR (95% CI) reported by study<br>authors |                     |                           |
|--------------------------------------|----------------------|--------------------|-------------------------------------|----------------------------------------------|---------------------|---------------------------|
|                                      |                      |                    |                                     | Organism<br>outcome                          | Unadjusted, OR      | Adjusted, aOR             |
|                                      |                      |                    |                                     |                                              |                     | No multivariable analysis |
| Harada, 2008                         | UU                   | PTB                | Not defined                         | NR                                           |                     | No multivariable analysis |
| Hillier, 1988                        | MH                   | PTB                | Born < 37 weeks                     | NR                                           |                     | No multivariable analysis |
| Holst, 1994                          | MH                   | PTB                | Born < 37 weeks                     | NR                                           |                     | No multivariable analysis |
| Jalava, 2002                         | UU                   | PTB                | Born < 37 weeks                     | UU_PTB                                       | RR 3.34 (1.27, 8.8) | No multivariable analysis |
| Jones, 2009                          | MH, UU,<br>UP        | PTB<br>PROM        | Born < 37 weeks<br>†                | NR                                           |                     | No multivariable analysis |
| Kacerovsky,<br>2009                  | MH, UU               | PROM               | †                                   | NR                                           |                     | No multivariable analysis |
| Kafetzis, 2004                       | UU                   | PTB<br>PROM<br>PND | Born < 37 weeks<br>†<br>Not defined | NR                                           |                     | No multivariable analysis |

| First author,<br>publication<br>year | Organism<br>reported | Outcome | Definition<br>Provided | OR/ RR (95% CI) reported by study<br>authors |                   |                                                                |
|--------------------------------------|----------------------|---------|------------------------|----------------------------------------------|-------------------|----------------------------------------------------------------|
|                                      |                      |         |                        | Organism<br>outcome                          | Unadjusted, OR    | Adjusted, aOR                                                  |
| Kumar, 2006                          | MH                   | PTB     | Born < 37 weeks        |                                              |                   | No multivariable analysis                                      |
| McDonald,<br>1992                    | MH                   | PTB     | Born < 37 weeks        | MH_PTB                                       | OR 1.7 (0.9, 3.5) | aOR 1.1 (0.5, 2.5)                                             |
|                                      |                      | PROM    | Not defined            | MH_PROM                                      | OR 1.5 (0.5, 4.3) | aOR 1.1 (0.3, 3.7)                                             |
|                                      |                      |         |                        |                                              |                   | Adjusted for 'confounding demographic and obstetric variables' |
| Mitsunari,<br>2005                   | UU                   | PTB     | Not defined            | NR                                           |                   | No multivariable analysis                                      |
|                                      |                      | PROM    | Not defined            |                                              |                   |                                                                |
| Montenegro,<br>2019                  | MH, UU               | PTB     | Born < 37 weeks        | NR                                           |                   | No multivariable analysis                                      |
|                                      |                      | PROM    | Not defined            |                                              |                   |                                                                |
| Munday, 1984                         | MH                   | SA      | Not defined            | NR                                           |                   | No multivariable analysis                                      |

## Supporting information

For peer review only - <http://bmjopen.bmj.com/site/about/guidelines.xhtml>

| First author, publication year | Organism reported | Outcome | Definition Provided | OR/ RR (95% CI) reported by study authors |                      |                           |
|--------------------------------|-------------------|---------|---------------------|-------------------------------------------|----------------------|---------------------------|
|                                |                   |         |                     | Organism outcome                          | Unadjusted, OR       | Adjusted, aOR             |
| Oliveira, 2020                 | MH, UU, UP        | SA      | **                  | MH_SA                                     | OR 0.08 (0.2, 3.17)  | No multivariable analysis |
|                                |                   |         |                     | UU_SA                                     | OR 2.21 (0.6, 8.22)  |                           |
|                                |                   |         |                     | UP_SA                                     | OR 1.74 (0.61, 4.93) |                           |
| Payne, 2014                    | UU, UP            | PTB     | Born < 37 weeks     |                                           |                      | NR                        |
| Povlsen, 2001                  | UU                | PTB     | Born < 37 weeks     | UU_PTB                                    | OR 1.0 (0.6, 1.7)    | aOR 0.7 (0.4, 1.2)        |
|                                |                   | LBW     | <2.5kg              |                                           |                      | Adjusted for LBW          |
| Toth, 1992                     | MH                | PTB     | Born < 37 weeks     | NR                                        |                      | No multivariable analysis |
| Yoon, 2001                     | UU                | PTB     | Born < 37 weeks     | NR                                        |                      | No multivariable analysis |
|                                |                   | PROM    | Not defined         |                                           |                      |                           |

**Abbreviations** LBW: low birth weight defined as birth weight <2.5kg; NAAT, nucleic acid amplification tests; NR, not reported; MH, *M. hominis*; PND, perinatal mortality; PROM, premature rupture of membrane; PTB, preterm birth; SA: spontaneous abortion; UP, *U. parvum*; UU, *U. urealyticum*

Supporting information

\*\*SA defined as pregnancy loss at <20 weeks gestation or as defined by author; †PROM defined as rupture of membrane before 37 completed weeks or as defined by author.

**Table S2.3** Descriptive tables: Cross sectional studies (n=6)

| First author, publication year | Organism reported | Total enrolled | Definition Provided |                                | OR/ RR (95% CI) reported by study authors |                                                                                                                                                                                      |
|--------------------------------|-------------------|----------------|---------------------|--------------------------------|-------------------------------------------|--------------------------------------------------------------------------------------------------------------------------------------------------------------------------------------|
|                                |                   |                | Outcome             |                                | Organism outcome                          | Unadjusted, OR                                                                                                                                                                       |
| <b>Abele-Horn, 2000</b>        | UU                | 295            | PTB, PROM           | Born < 37 weeks<br>†           | NR                                        | Multivariable analysis reported in text: UU >10 <sup>5</sup> cfu/ml associated with PTB, adjusted for PROM, prolonged rupture of membranes, chorioamnionitis, obstetric risk factors |
| <b>Grattard, 1995</b>          | MH                | 208            | PTB, PROM, LBW      | Born < 37 weeks<br>†<br><2.5kg | NR                                        | No multivariable analysis                                                                                                                                                            |
| <b>Kundsinn, 1984</b>          | MH                | 801            | PND                 | ∞                              | NR                                        | No multivariable analysis                                                                                                                                                            |

| First author, publication year | Organism reported | Total enrolled | Outcome | Definition Provided | OR/ RR (95% CI) reported by study authors |                           |
|--------------------------------|-------------------|----------------|---------|---------------------|-------------------------------------------|---------------------------|
|                                |                   |                |         |                     | Organism outcome                          | Unadjusted, OR            |
| McCormack, 1975                | MH                | 327            | LBW     | <2.5kg              | NR                                        | No multivariable analysis |
|                                |                   |                | PND     | Not defined         |                                           |                           |
| Nasution, 2007                 | MH, UU            | 120            | PROM    | Not defined         | NR                                        | No multivariable analysis |
| Sweeney, 2016                  | UU, UP            | 535            | PTB     | Born < 37 weeks     | NR                                        | No multivariable analysis |

**Abbreviations** LBW: low birth weight defined as birth weight <2.5kg; NAAT, nucleic acid amplification tests; NR, not reported; MH, *M. hominis*; PND, perinatal mortality; PROM, premature rupture of membrane; PTB, preterm birth; SA: spontaneous abortion; UP, *U. parvum*; UU, *U. urealyticum*

†PROM defined as rupture of membrane before 37 completed weeks or as defined by author; ∞ Perinatal death, defined as birth after 20 weeks gestation (stillbirth) or death within 28 days after birth (neonatal death) unless otherwise defined by the study authors.

**Supporting information**

**Table S3.1** Summary description of studies reporting *M. hominis* (n=42), by income status

| First author,<br>Pub year,<br>country | Gestational age<br>assessment | Sample size for outcome of interest;<br>Number of adverse outcomes in women with <i>M. hominis</i> / total number of women<br>with adverse outcome (%) |            |      |           |           | NICE checklist<br>criteria fulfilled* |
|---------------------------------------|-------------------------------|--------------------------------------------------------------------------------------------------------------------------------------------------------|------------|------|-----------|-----------|---------------------------------------|
|                                       |                               | PTB                                                                                                                                                    | LBW        | PROM | SA        | PND       |                                       |
|                                       |                               | <b>High-income country<sup>‡</sup></b>                                                                                                                 |            |      |           |           |                                       |
| Agger, 2014, USA                      | NR                            | 676                                                                                                                                                    |            |      |           |           | +/+                                   |
|                                       |                               | 14/54 (26)                                                                                                                                             |            |      |           |           |                                       |
| Braun, 1971, USA                      | LMP                           |                                                                                                                                                        | 485        |      | 491       | 491       | +/-                                   |
|                                       |                               |                                                                                                                                                        | 24/42 (57) |      | 3/6 (50)  | 7/10 (70) |                                       |
| Cassell, 1983, USA                    | US                            | 61                                                                                                                                                     |            |      |           | 61        | +/-                                   |
|                                       |                               | 1/10 (10)                                                                                                                                              |            |      |           | 0/3 (0)   |                                       |
| Donders, 2009, Belgium                | US                            | 744                                                                                                                                                    |            |      | 759       |           | +/+                                   |
|                                       |                               | 5/50 (10)                                                                                                                                              |            |      | 1/15 (7)  |           |                                       |
| Embree, 1980, Canada                  | LMP, NN<br>assessment         |                                                                                                                                                        |            |      | 157       | 157       | -/-                                   |
|                                       |                               |                                                                                                                                                        |            |      | 3/10 (30) | 0/39 (0)  |                                       |

**Supporting information**For peer review only - <http://bmjopen.bmj.com/site/about/guidelines.xhtml>

| First author,<br>Pub year,<br>country | Gestational age<br>assessment | Sample size for outcome of interest;<br>Number of adverse outcomes in women with <i>M. hominis</i> / total number of women<br>with adverse outcome (%) |                 |                  |                  |     | NICE checklist<br>criteria fulfilled* |
|---------------------------------------|-------------------------------|--------------------------------------------------------------------------------------------------------------------------------------------------------|-----------------|------------------|------------------|-----|---------------------------------------|
|                                       |                               | PTB                                                                                                                                                    | LBW             | PROM             | SA               | PND |                                       |
| Grattard, 1995, France                | NR                            | 193<br>3/8 (38)                                                                                                                                        | 202<br>2/8 (25) | 208<br>4/36 (11) |                  |     | -/+                                   |
| Harrison, 1983, USA                   | NR                            |                                                                                                                                                        |                 |                  | 348<br>4/22 (18) |     | -/-                                   |
| Hillier, 1988, USA                    | US, FH, LMP                   | 112<br>3/38 (8)                                                                                                                                        |                 |                  |                  |     | +/+                                   |
| Hillier, 1995, USA                    | LMP                           | 9105<br>161/423 (38)                                                                                                                                   |                 |                  |                  |     |                                       |
| Holst, 1994, Sweden                   | US, LMP                       | 87<br>10/22 (45)                                                                                                                                       |                 |                  |                  |     | ++/+                                  |
| Jones, 2009,<br>United Kingdom        | NR                            | 74<br>2/53 (4)                                                                                                                                         |                 | 74<br>2/26 (8)   |                  |     | -/-                                   |

## Supporting information

For peer review only - <http://bmjopen.bmj.com/site/about/guidelines.xhtml>



| First author,<br>Pub year,<br>country | Gestational age<br>assessment | Sample size for outcome of interest;<br>Number of adverse outcomes in women with <i>M. hominis</i> / total number of women<br>with adverse outcome (%) |          |           |          |           | NICE checklist<br>criteria fulfilled* |
|---------------------------------------|-------------------------------|--------------------------------------------------------------------------------------------------------------------------------------------------------|----------|-----------|----------|-----------|---------------------------------------|
|                                       |                               | PTB                                                                                                                                                    | LBW      | PROM      | SA       | PND       |                                       |
| Kataoka, 2006, Japan                  | US, LMP                       | 872                                                                                                                                                    |          | 872       | 877      | 872       | +/+                                   |
|                                       |                               | 4/16 (25)                                                                                                                                              |          | 1/7 (14)  | 0/5 (0)  | 0/1 (0)   |                                       |
| Kundsin, 1984, USA                    | NR                            |                                                                                                                                                        |          |           |          | 801       | -/+                                   |
|                                       |                               |                                                                                                                                                        |          |           |          | 5/29 (17) |                                       |
| Kwak, 2014, South Korea               | NR                            | 112                                                                                                                                                    |          |           |          |           | +/+                                   |
|                                       |                               | 13/86 (15)                                                                                                                                             |          |           |          |           |                                       |
| Lee, 2016,<br>South Korea             | NR                            | 466                                                                                                                                                    |          | 466       | 466      |           | -/-                                   |
|                                       |                               | 1/141 (<1)                                                                                                                                             |          | 0/187 (0) | 0/11 (0) |           |                                       |
| McCormack, 1975, USA                  | NR                            |                                                                                                                                                        | 326      |           |          | 326       | +/-                                   |
|                                       |                               |                                                                                                                                                        | 3/42 (7) |           |          | 2/6 (33)  |                                       |
| McDonald, 1992,<br>Australia          | LMP, US                       | 786                                                                                                                                                    |          | 708       |          |           | -/-                                   |
|                                       |                               | 11/135 (8)                                                                                                                                             |          | 4/57 (8)  |          |           |                                       |

## Supporting information

For peer review only - <http://bmjopen.bmj.com/site/about/guidelines.xhtml>

| First author,<br>Pub year,<br>country | Gestational age<br>assessment | Sample size for outcome of interest;<br>Number of adverse outcomes in women with <i>M. hominis</i> / total number of women<br>with adverse outcome (%) |     |                   |                  |                 | NICE checklist<br>criteria fulfilled* |
|---------------------------------------|-------------------------------|--------------------------------------------------------------------------------------------------------------------------------------------------------|-----|-------------------|------------------|-----------------|---------------------------------------|
|                                       |                               | PTB                                                                                                                                                    | LBW | PROM              | SA               | PND             |                                       |
| McDonald, 1994,<br>Australia          | US, LMP                       | 337<br>7/45 (16)                                                                                                                                       |     |                   |                  |                 | -/-                                   |
| Menard, 2010,<br>France               | US, LMP                       | 90<br>6/36 (17)                                                                                                                                        |     |                   |                  |                 | -/-                                   |
| Minkoff, 1984, USA                    | NR                            | 201<br>10/18 (56)                                                                                                                                      |     | 188<br>21/40 (53) |                  |                 | -/-                                   |
| Munday, 1984, United<br>Kingdom       | NR                            |                                                                                                                                                        |     |                   | 241<br>9/76 (12) |                 | +/-                                   |
| Nguyen, 2004, Switzerland             | NR                            | 395<br>3/10 (30)                                                                                                                                       |     | 365<br>0/7 (0%)   |                  | 395<br>1/6 (17) | +/+                                   |
| Payne, 2016, Australia                | NR                            | 187<br>2/13 (15)                                                                                                                                       |     |                   |                  |                 | +/+                                   |

## Supporting information

For peer review only - <http://bmjopen.bmj.com/site/about/guidelines.xhtml>

| First author,<br>Pub year,<br>country  | Gestational age<br>assessment | Sample size for outcome of interest;<br>Number of adverse outcomes in women with <i>M. hominis</i> / total number of women<br>with adverse outcome (%) |            |      |    |     | NICE checklist<br>criteria fulfilled* |
|----------------------------------------|-------------------------------|--------------------------------------------------------------------------------------------------------------------------------------------------------|------------|------|----|-----|---------------------------------------|
|                                        |                               | PTB                                                                                                                                                    | LBW        | PROM | SA | PND |                                       |
| Payne, 2020, Australia                 | NR                            | 1000                                                                                                                                                   |            |      |    |     | +/+                                   |
|                                        |                               | 9/118 (8)                                                                                                                                              |            |      |    |     |                                       |
| Sperling, 1988, USA                    | NR                            |                                                                                                                                                        | 404        |      |    |     | -/-                                   |
|                                        |                               |                                                                                                                                                        | 14/37 (38) |      |    |     |                                       |
| Toth, 1992, United<br>Kingdom          | NR                            | 80                                                                                                                                                     |            |      |    |     | -/-                                   |
|                                        |                               | 3/39 (8)                                                                                                                                               |            |      |    |     |                                       |
| Usui, 2002, Japan                      | LMP                           | 1958                                                                                                                                                   |            |      |    |     | +/-                                   |
|                                        |                               | 15/342 (4)                                                                                                                                             |            |      |    |     |                                       |
| <b>Upper-middle income<sup>‡</sup></b> |                               |                                                                                                                                                        |            |      |    |     |                                       |
| Berman, 1987, Mexico                   | NR                            |                                                                                                                                                        | 796        |      |    |     | -/+                                   |
|                                        |                               |                                                                                                                                                        | 28/48 (58) |      |    |     |                                       |

| First author,<br>Pub year,<br>country | Gestational age<br>assessment | Sample size for outcome of interest;<br>Number of adverse outcomes in women with <i>M. hominis</i> / total number of women<br>with adverse outcome (%) |                  |                |                  |                  | NICE checklist<br>criteria fulfilled* |
|---------------------------------------|-------------------------------|--------------------------------------------------------------------------------------------------------------------------------------------------------|------------------|----------------|------------------|------------------|---------------------------------------|
|                                       |                               | PTB                                                                                                                                                    | LBW              | PROM           | SA               | PND              |                                       |
| Chua, 1999, Malaysia                  | LMP, NN<br>assessment         | 120<br>9/60 (15)                                                                                                                                       |                  |                |                  |                  | +/+                                   |
| Farhadifar, 2016, Iran                | US/LMP                        |                                                                                                                                                        |                  |                | 218<br>2/109 (2) |                  | +/+                                   |
| Govender, 2009, South<br>Africa       | NR                            | 199<br>11/20 (55)                                                                                                                                      |                  |                |                  |                  | -/-                                   |
| Luton, 1994, Gabon                    | US, LMP                       | 181<br>11/20 (55)                                                                                                                                      | 181<br>8/13 (62) |                |                  | 198<br>5/10 (50) | -/-                                   |
| Montenegro, 2019,<br>Colombia         | NR                            | 211<br>1/84 (1)                                                                                                                                        |                  | 211<br>0/3 (0) |                  |                  | +/+                                   |
| Odendaal,<br>2002, South Africa       | US                            | 395<br>33/119 (28)                                                                                                                                     |                  |                | 395<br>1/7 (14)  | 395<br>2/4 (50)  | +/-                                   |

## Supporting information

For peer review only - <http://bmjopen.bmj.com/site/about/guidelines.xhtml>

| First author,<br>Pub year,<br>country  | Gestational age<br>assessment | Sample size for outcome of interest;<br>Number of adverse outcomes in women with <i>M. hominis</i> / total number of women<br>with adverse outcome (%) |     |      |            |     | NICE checklist<br>criteria fulfilled* |
|----------------------------------------|-------------------------------|--------------------------------------------------------------------------------------------------------------------------------------------------------|-----|------|------------|-----|---------------------------------------|
|                                        |                               | PTB                                                                                                                                                    | LBW | PROM | SA         | PND |                                       |
| Oliveria, 2020, Brazil                 | NR                            |                                                                                                                                                        |     |      | 109        |     | +/+                                   |
|                                        |                               |                                                                                                                                                        |     |      | 11/89 (12) |     |                                       |
| <b><u>Lower-middle/low income‡</u></b> |                               |                                                                                                                                                        |     |      |            |     |                                       |
| Schwab, 2015, Indonesia                | LMP                           | 62                                                                                                                                                     |     |      |            |     | -/-                                   |
|                                        |                               | 2/23 (9)                                                                                                                                               |     |      |            |     |                                       |
| Kumar, 2006, India                     | NR                            | 120                                                                                                                                                    |     |      |            |     | +/+                                   |
|                                        |                               | 4/60 (7)                                                                                                                                               |     |      |            |     |                                       |
| <b><u>Country not reported</u></b>     |                               |                                                                                                                                                        |     |      |            |     |                                       |
| González Bosquet, 2006                 | US                            | 120                                                                                                                                                    |     |      |            |     | +/+                                   |
|                                        |                               | 0/70 (0)                                                                                                                                               |     |      |            |     |                                       |
| Daskalakis, 2009                       | US, LMP                       | 37                                                                                                                                                     |     |      |            |     | +/+                                   |
|                                        |                               | 8/25 (32)                                                                                                                                              |     |      |            |     |                                       |

| First author,<br>Pub year,<br>country | Gestational age<br>assessment | Sample size for outcome of interest;<br>Number of adverse outcomes in women with <i>M. hominis</i> / total number of women<br>with adverse outcome (%) |     |                    |    |     | NICE checklist<br>criteria fulfilled* |
|---------------------------------------|-------------------------------|--------------------------------------------------------------------------------------------------------------------------------------------------------|-----|--------------------|----|-----|---------------------------------------|
|                                       |                               | PTB                                                                                                                                                    | LBW | PROM               | SA | PND |                                       |
| Kacerovsky, 2009                      | NR                            |                                                                                                                                                        |     | 450<br>63/225 (28) |    |     | -/-                                   |
| Nasution, 2007                        | NR                            |                                                                                                                                                        |     | 80<br>4/40 (10)    |    |     | -/-                                   |
| Perni, 2004                           | NR                            | 179<br>0/10 (0)                                                                                                                                        |     | 179<br>2/5 (40)    |    |     | +/+                                   |

**Abbreviations:** MH, *Mycoplasma hominis*; UU, *Ureaplasma urealyticum*; UP, *Ureaplasma parvum*; NR, not reported.

LBW: low birth weight, defined as birth weight <2.5kg ; PTB: preterm birth, defined as delivery before 37weeks gestation; PROM: premature rupture of membranes, - defined as clinically confirmed rupture of membrane before 37weeks gestation; PND, perinatal mortality, defined as stillbirth (death after 20/40 gestation) or neonatal death (death <28 day since birth), unless otherwise defined by the study authors; SA: spontaneous abortion- defined as pregnancy loss at <20/40 or as defined by author.

**Supporting information**

1  
2  
3 \* UK National Institute of Health and Care Excellence (NICE) checklist, summary of criteria for internal/external validity: +/+ Some checklist criteria  
4 fulfilled; -/-Few or no checklist criteria fulfilled  
5  
6

7  
8 ‡ high-income (\$12,376 or more); upper-middle income (\$3,996 to \$1,2375); lower-middle-income (\$1,025 to \$3,995); low-income (\$1,025 or less) [Source:  
9 World Bank, Gross national income per capita, 2019-2020 <https://datatopics.worldbank.org/world-development-indicators/the-world-by-income-and-region.html>]  
10  
11  
12  
13  
14  
15  
16  
17  
18  
19  
20  
21  
22  
23  
24  
25  
26  
27  
28  
29  
30  
31  
32  
33  
34  
35  
36  
37  
38  
39  
40  
41  
42

**Table S3.2** Summary description of studies reporting *U. urealyticum* (n=31), by income status

| First author, pub. year, country       | Gestational age assessment | Sample size for outcome of interest;                                                                            |     |            |    |     | NICE checklist criteria fulfilled |
|----------------------------------------|----------------------------|-----------------------------------------------------------------------------------------------------------------|-----|------------|----|-----|-----------------------------------|
|                                        |                            | Number of adverse outcomes in women with <i>U. urealyticum</i> / total number of women with adverse outcome (%) |     |            |    |     |                                   |
|                                        |                            | PTB                                                                                                             | LBW | PROM       | SA | PND |                                   |
| <b>High-income country<sup>‡</sup></b> |                            |                                                                                                                 |     |            |    |     |                                   |
| Abele-Horn, 2000, Germany              | US, LMP                    | 295                                                                                                             |     | 295        |    |     | -/++                              |
|                                        |                            | 57/ 73 (78)                                                                                                     |     | 58/76 (76) |    |     |                                   |
| Agger, 2014, USA                       | NR                         | 676                                                                                                             |     |            |    |     | +/+                               |
|                                        |                            | 4/54 (11)                                                                                                       |     |            |    |     |                                   |
| Freitas, 2018, Canada                  | NR                         | 216                                                                                                             |     |            |    |     | +/+                               |
|                                        |                            | 0/46 (0)                                                                                                        |     |            |    |     |                                   |
| Harada, 2008, Japan                    | NR                         | 145                                                                                                             |     |            |    |     | +/+                               |
|                                        |                            | 23/45 (51)                                                                                                      |     |            |    |     |                                   |



| First author, pub. year,<br>country | Gestational<br>age assessment | Sample size for outcome of interest;<br>Number of adverse outcomes in women with <i>U. urealyticum</i> / total number of<br>women with adverse outcome (%) |     |                     |                   |                  | NICE checklist<br>criteria fulfilled |
|-------------------------------------|-------------------------------|------------------------------------------------------------------------------------------------------------------------------------------------------------|-----|---------------------|-------------------|------------------|--------------------------------------|
|                                     |                               | PTB                                                                                                                                                        | LBW | PROM                | SA                | PND              |                                      |
| Jones, 2009, UK                     | NR                            | 74<br>2/53 (4)                                                                                                                                             |     | 74<br>2/26 (8)      |                   |                  | -/-                                  |
| Kafetzis, 2004, Greece              | NR                            | 251<br>46/126 (37)                                                                                                                                         |     | 250<br>9/20 (45)    |                   | 171<br>6/16 (38) | +/+                                  |
| Kataoka, 2006, Japan                | US, LMP                       | 872<br>0/16 (0)                                                                                                                                            |     | 8772<br>0/7 (0)     | 877<br>1/5 (20)   | 872<br>0/1 (0)   | +/+                                  |
| Koucky, 2016, Czech<br>Republic     | US, LMP                       | 63<br>17/29 (59)                                                                                                                                           |     |                     |                   |                  | +/+                                  |
| Kwak, 2014, South Korea             | NR                            | 179<br>84/129 (65)                                                                                                                                         |     |                     |                   |                  | +/+                                  |
| Lee, 2016, South Korea              | NR                            | 936<br>72/141 (51)                                                                                                                                         |     | 936<br>100/187 (53) | 936<br>12/23 (52) |                  | -/-                                  |

## Supporting information

For peer review only - <http://bmjopen.bmj.com/site/about/guidelines.xhtml>

| First author, pub. year, country | Gestational age assessment | Sample size for outcome of interest; Number of adverse outcomes in women with <i>U. urealyticum</i> / total number of women with adverse outcome (%) |                   |                  |    |     | NICE checklist criteria fulfilled |
|----------------------------------|----------------------------|------------------------------------------------------------------------------------------------------------------------------------------------------|-------------------|------------------|----|-----|-----------------------------------|
|                                  |                            | PTB                                                                                                                                                  | LBW               | PROM             | SA | PND |                                   |
| Mitsunari, 2005, Japan           | NR                         | 82<br>17/21 (81)                                                                                                                                     |                   | 82<br>10/11 (91) |    |     | +/+                               |
| Payne, 2014, China & Australia   | US                         | 972<br>2/13 (15)                                                                                                                                     |                   |                  |    |     | +/+                               |
| Payne, 2016, Australia           | NR                         | 187<br>0/115 (0)                                                                                                                                     |                   |                  |    |     | +/+                               |
| Payne, 2020, Australia           | NR                         | 1000<br>14/118 (12)                                                                                                                                  |                   |                  |    |     | +/+                               |
| Povlsen, 2001, Denmark           | NR                         | 484<br>49/84 (58)                                                                                                                                    | 484<br>36/48 (75) |                  |    |     | +/+                               |
| Peretz, 2020, Israel             | NR                         | 214<br>3/5 (60)                                                                                                                                      | 214<br>1/3 (33)   |                  |    |     | -/-                               |

## Supporting information

For peer review only - <http://bmjopen.bmj.com/site/about/guidelines.xhtml>

| First author, pub. year,<br>country    | Gestational<br>age assessment | Sample size for outcome of interest;<br>Number of adverse outcomes in women with <i>U. urealyticum</i> / total number of<br>women with adverse outcome (%) |     |                            |                    |     | NICE checklist<br>criteria fulfilled |
|----------------------------------------|-------------------------------|------------------------------------------------------------------------------------------------------------------------------------------------------------|-----|----------------------------|--------------------|-----|--------------------------------------|
|                                        |                               | PTB                                                                                                                                                        | LBW | PROM                       | SA                 | PND |                                      |
| Rittenschober-Böhm, 2018,<br>Austria   | US                            | 2183<br>19/146 (13)                                                                                                                                        |     |                            |                    |     | +/+                                  |
| Sweeney, 2016, USA                     | NR                            | 535<br>6/443 (1)                                                                                                                                           |     |                            |                    |     | +/-                                  |
| Usui, 2002, Japan                      | NR                            | 1958<br>189/342 (55)                                                                                                                                       |     |                            |                    |     | +/-                                  |
| Yoon, 2001,<br>South Korea             | NR                            | 114<br>3/19 (16)                                                                                                                                           |     | Missing data<br>2/9 (22)** |                    |     | +/+                                  |
| <b>Upper-middle income<sup>‡</sup></b> |                               |                                                                                                                                                            |     |                            |                    |     |                                      |
| Ahmadi, 2014, Iran                     | US, LMP                       |                                                                                                                                                            |     |                            | 218<br>18/109 (17) |     | +/+                                  |

| First author, pub. year,<br>country | Gestational<br>age assessment | Sample size for outcome of interest;<br>Number of adverse outcomes in women with <i>U. urealyticum</i> / total number of<br>women with adverse outcome (%) |     |                |                   |     | NICE checklist<br>criteria fulfilled |
|-------------------------------------|-------------------------------|------------------------------------------------------------------------------------------------------------------------------------------------------------|-----|----------------|-------------------|-----|--------------------------------------|
|                                     |                               | PTB                                                                                                                                                        | LBW | PROM           | SA                | PND |                                      |
| Govender, 2009, South<br>Africa     | NR                            | 199<br>5/20 (25)                                                                                                                                           |     |                |                   |     | -/-                                  |
| Oliveira, 2020, Brazil              | NR                            |                                                                                                                                                            |     |                | 109<br>25/89 (28) |     | +/+                                  |
| Montenegro, 2019,<br>Colombia       | NR                            | 211<br>0/84 (0)                                                                                                                                            |     | 211<br>0/3 (0) |                   |     | +/+                                  |
| <b><u>Lower-middle income</u></b>   |                               |                                                                                                                                                            |     |                |                   |     |                                      |
| Schwab, 2015, Indonesia             | LMP                           | 62<br>2/23 (9)                                                                                                                                             |     |                |                   |     | -/-                                  |
| <b><u>Country not reported</u></b>  |                               |                                                                                                                                                            |     |                |                   |     |                                      |
| Daskalakis, 2009                    | US, LMP                       | 37<br>17/25 (68)                                                                                                                                           |     |                |                   |     | +/+                                  |

**Supporting information**For peer review only - <http://bmjopen.bmj.com/site/about/guidelines.xhtml>

| First author, pub. year,<br>country | Gestational<br>age assessment | Sample size for outcome of interest;<br>Number of adverse outcomes in women with <i>U. urealyticum</i> / total number of<br>women with adverse outcome (%) |          |              |          |     | NICE checklist<br>criteria fulfilled |
|-------------------------------------|-------------------------------|------------------------------------------------------------------------------------------------------------------------------------------------------------|----------|--------------|----------|-----|--------------------------------------|
|                                     |                               | PTB                                                                                                                                                        | LBW      | PROM         | SA       | PND |                                      |
| Gerber, 2003,                       | NR                            | 254                                                                                                                                                        |          | 254          |          |     | +/-                                  |
|                                     |                               | 9/10 (90)                                                                                                                                                  |          | 6/7 (86)     |          |     |                                      |
| Jalava, 2002                        | NR                            | 122                                                                                                                                                        |          |              |          |     | +/+                                  |
|                                     |                               | 12/17 (71)                                                                                                                                                 |          |              |          |     |                                      |
| Kacerovsky, 2009                    | NR                            |                                                                                                                                                            |          | 450          |          |     | -/-                                  |
|                                     |                               |                                                                                                                                                            |          | 152/225 (68) |          |     |                                      |
| Nasution, 2007                      | NR                            |                                                                                                                                                            |          | 80           |          |     | -/-                                  |
|                                     |                               |                                                                                                                                                            |          | 9/40 (23)    |          |     |                                      |
| Perni, 2004                         | Cohort                        | NR                                                                                                                                                         | 172      |              | 172      |     | +/+                                  |
|                                     |                               |                                                                                                                                                            | 0/10 (0) |              | 3/5 (60) |     |                                      |

**Abbreviations:** MH, *Mycoplasma hominis*; UU, *Ureaplasma urealyticum*; UP, *Ureaplasma parvum*; NR, not reported.

### Supporting information

For peer review only - <http://bmjopen.bmj.com/site/about/guidelines.xhtml>

1  
2  
3 LBW: low birth weight, defined as birth weight <2.5kg ; PTB: preterm birth, defined as delivery before 37weeks gestation; PROM: premature rupture of  
4 membranes, - defined as clinically confirmed rupture of membrane before 37weeks gestation; PND, perinatal mortality, defined as stillbirth (death after 20/40  
5 gestation) or neonatal death (death <28 day since birth), unless otherwise defined by the study authors; SA: spontaneous abortion- defined as pregnancy loss at  
6 <20/40 or as defined by author.  
7  
8  
9  
10  
11

12  
13 \* UK National Institute of Health and Care Excellence (NICE) checklist, summary of criteria for internal/external validity: +/+ Some checklist criteria fulfilled; -  
14 /-Few or no checklist criteria fulfilled  
15  
16  
17

18 ‡high-income (\$12,376 or more); upper-middle income (\$3,996 to \$1,2375); lower-middle-income (\$1,025 to \$3,995); low-income (\$1,025 or less) [Source:  
19 World Bank, Gross national income per capita, 2019-2020 <https://datatopics.worldbank.org/world-development-indicators/the-world-by-income-and-region.html>]  
20  
21  
22  
23  
24  
25  
26  
27  
28  
29  
30  
31  
32  
33  
34  
35  
36  
37  
38  
39  
40  
41  
42

**Table S3.3** Summary description of studies reporting *U. parvum* (n=12), by income status

| First author,<br>Pub. year, country                     | Study<br>design | Gestational age<br>assessment | Sample size for outcome of interest.                                                                          |     |            |          |           | NICE checklist<br>criteria fulfilled |
|---------------------------------------------------------|-----------------|-------------------------------|---------------------------------------------------------------------------------------------------------------|-----|------------|----------|-----------|--------------------------------------|
|                                                         |                 |                               | Number of adverse outcomes in women with <i>U. parvum</i> / total<br>number of women with adverse outcome (%) |     |            |          |           |                                      |
|                                                         |                 |                               | PTB                                                                                                           | LBW | PROM       | SA       | PND       |                                      |
| <b>Upper-middle and high-income country<sup>‡</sup></b> |                 |                               |                                                                                                               |     |            |          |           |                                      |
| <b>Agger, 2014, USA</b>                                 | Cohort          | NR                            | 676                                                                                                           |     |            |          |           | ++                                   |
|                                                         |                 |                               | 29/54 (54)                                                                                                    |     |            |          |           |                                      |
| <b>Freitas, 2018, Canada</b>                            | Case-control    | NR                            | 216                                                                                                           |     |            |          |           | ++                                   |
|                                                         |                 |                               | 14/46 (30)                                                                                                    |     |            |          |           |                                      |
| <b>Govender, 2009,<br/>South Africa</b>                 | Cohort          | NR                            | 199                                                                                                           |     |            |          |           | -/-                                  |
|                                                         |                 |                               | 10/20 (50)                                                                                                    |     |            |          |           |                                      |
| <b>Jones, 2009, United<br/>Kingdom</b>                  | Case-control    | NR                            | 74                                                                                                            |     | 74         |          |           | -/-                                  |
|                                                         |                 |                               | 19/53 (36)                                                                                                    |     | 11/26 (42) |          |           |                                      |
| <b>Kataoka, 2006, Japan</b>                             | Cohort          | US, LMP                       | 872                                                                                                           |     | 872        | 877      | 872       | ++                                   |
|                                                         |                 |                               | 4/16 (25)                                                                                                     |     | 6/7 (86)   | 3/5 (60) | 1/1 (100) |                                      |

|    |                                           |                 |    |              |            |     |
|----|-------------------------------------------|-----------------|----|--------------|------------|-----|
| 1  |                                           |                 |    |              |            |     |
| 2  |                                           |                 |    |              |            |     |
| 3  | <b>Oliveira, 2020, Brazil</b>             | Case-control    | NR |              | 109        | ++  |
| 4  |                                           |                 |    |              |            |     |
| 5  |                                           |                 |    |              | 68/89 (76) |     |
| 6  |                                           |                 |    |              |            |     |
| 7  |                                           |                 |    |              |            |     |
| 8  | <b>Payne, 2014, China &amp; Australia</b> | Case-control    | NR | 972          |            | ++  |
| 9  |                                           |                 |    | 2/115 (2)    |            |     |
| 10 |                                           |                 |    |              |            |     |
| 11 |                                           |                 |    |              |            |     |
| 12 | <b>Payne, 2016, Australia</b>             | Cohort          | NR | 187          |            | ++  |
| 13 |                                           |                 |    |              |            |     |
| 14 |                                           |                 |    | 10/13 (77)   |            |     |
| 15 |                                           |                 |    |              |            |     |
| 16 |                                           |                 |    |              |            |     |
| 17 | <b>Payne, 2020, Australia</b>             | Cohort          | NR | 1000         |            | ++  |
| 18 |                                           |                 |    |              |            |     |
| 19 |                                           |                 |    | 56/118 (48)  |            |     |
| 20 |                                           |                 |    |              |            |     |
| 21 |                                           |                 |    |              |            |     |
| 22 | <b>Peretz, 2020, Israel</b>               | Cohort          | NR | 214          | 214        | -/- |
| 23 |                                           |                 |    |              |            |     |
| 24 |                                           |                 |    | 1/5 (20)     | 1/3 (33)   |     |
| 25 |                                           |                 |    |              |            |     |
| 26 | <b>Rittenschober-Böhm, 2018, Austria</b>  | Cohort          | US | 3316         |            | ++  |
| 27 |                                           |                 |    |              |            |     |
| 28 |                                           |                 |    | 140/267 (52) |            |     |
| 29 |                                           |                 |    |              |            |     |
| 30 |                                           |                 |    |              |            |     |
| 31 | <b>Sweeney, 2016, USA</b>                 | Cross-sectional | NR | 535          |            | +/- |
| 32 |                                           |                 |    |              |            |     |
| 33 |                                           |                 |    | 27/443 (4)   |            |     |
| 34 |                                           |                 |    |              |            |     |

35 **Abbreviations:** MH, *Mycoplasma hominis*; UU, *Ureaplasma urealyticum*; UP, *Ureaplasma parvum*; NR, not reported.



1  
2  
3 LBW: low birth weight, defined as birth weight <2.5kg ; PTB: preterm birth, defined as delivery before 37weeks gestation; PROM: premature rupture of  
4 membranes, - defined as clinically confirmed rupture of membrane before 37weeks gestation; PND, perinatal mortality, defined as stillbirth (death after 20/40  
5 gestation) or neonatal death (death <28 day since birth), unless otherwise defined by the study authors; SA: spontaneous abortion- defined as pregnancy loss at  
6 <20/40 or as defined by author.  
7  
8  
9  
10  
11

12 \* UK National Institute of Health and Care Excellence (NICE) checklist, summary of criteria for internal/external validity: ++ Some checklist criteria fulfilled; -  
13 /-Few or no checklist criteria fulfilled  
14  
15

16 ‡ high-income (\$12,376 or more); upper-middle income (\$3,996 to \$1,2375) [Source: World Bank, Gross national income per capita, 2019-2020  
17  
18

19 <https://datatopics.worldbank.org/world-development-indicators/the-world-by-income-and-region.html>  
20  
21  
22  
23  
24  
25  
26  
27  
28  
29  
30  
31  
32  
33  
34  
35  
36  
37  
38  
39  
40  
41  
42

**Table S4.1** Study setting and socio-demographics, cohort studies (n=26)

| <b>First author,<br/>year of<br/>publication</b> | <b>Location of<br/>study</b> | <b>Study setting</b> | <b>Urban/ rural<br/>location</b> | <b>Mean<sup>†</sup>/<br/>median age<br/>years (range)</b> | <b>Ethnicity</b> | <b>Other infections<br/>included/<br/>(excluded)</b> | <b>Smokers<br/>included (%)</b> | <b>Multiple<br/>pregnancies</b> |
|--------------------------------------------------|------------------------------|----------------------|----------------------------------|-----------------------------------------------------------|------------------|------------------------------------------------------|---------------------------------|---------------------------------|
| <b>Agger, 2014</b>                               | USA                          | NR/unclear;          | Mixed                            | NR                                                        | Mixed            | CT, NG, HPV, herpes,<br>syphilis <sup>‡</sup>        | NR                              | Yes                             |
| <b>Berman, 1987</b>                              | Mexico                       | Health facility      | NR/unclear                       | NR                                                        | NR               | CT                                                   | NR                              | No                              |
| <b>Braun, 1971</b>                               | USA                          | Health facility      | Urban                            | NR                                                        | Mixed            | NR                                                   | NR                              | NR                              |
| <b>Donders, 2009</b>                             | Belgium                      | Health facility      | Urban                            | 29 <sup>†</sup>                                           | Mixed            | BV;<br>(CT, TV, NG, syphilis)                        | 120/761<br>(15.8%)              | No                              |
| <b>Gerber, 2003</b>                              | NR                           | Health facility      | NR/unclear                       | 19-42                                                     | White            | NR                                                   | NR                              | Yes                             |
| <b>Govender, 2009</b>                            | South Africa                 | Health facility      | Urban                            | NA                                                        | NR               | HIV, CT <sup>‡</sup>                                 | NR                              | NR                              |
| <b>Harrison, 1983</b>                            | USA                          | Health facility      | Urban                            | NR                                                        | Mixed            | CT                                                   | NR                              | Yes                             |
| <b>Hillier, 1995</b>                             | USA                          | Health facility      | Urban                            | NR                                                        | Mixed            | BV, NG, CT, TV                                       | Yes but<br>#/%NR                | No                              |
| <b>Kataoka, 2006</b>                             | Japan                        | Health facility      | Urban                            | 28.9 <sup>†</sup>                                         | NR               | CT, NG <sup>‡</sup>                                  | NR                              | No                              |

**Supporting information**For peer review only - <http://bmjopen.bmj.com/site/about/guidelines.xhtml>

| <b>First author,<br/>year of<br/>publication</b> | <b>Location of<br/>study</b> | <b>Study setting</b> | <b>Urban/ rural<br/>location</b> | <b>Mean<sup>†</sup>/<br/>median age<br/>years (range)</b> | <b>Ethnicity</b> | <b>Other infections<br/>included/<br/>(excluded)</b> | <b>Smokers<br/>included (%)</b> | <b>Multiple<br/>pregnancies</b> |
|--------------------------------------------------|------------------------------|----------------------|----------------------------------|-----------------------------------------------------------|------------------|------------------------------------------------------|---------------------------------|---------------------------------|
| <b>Koucky, 2016</b>                              | Czech<br>Republic            | Health facility      | Urban                            | 31                                                        | NR               | NR                                                   | NR                              | No                              |
| <b>Kwak, 2014</b>                                | South Korea                  | Health facility      | Urban                            | 30.7                                                      | NR               | NR                                                   | NR                              | No                              |
| <b>Lee, 2016</b>                                 | South Korea                  | Health facility      | Urban                            | 31 (15-47)                                                | NR               | NR                                                   | NR                              | NR                              |
| <b>Luton, 1994</b>                               | Gabon                        | Health facility      | NR/unclear                       | NR                                                        | NR               | HIV, CT, TV,<br>NG, Syphilis                         | NR                              | No                              |
| <b>Minkoff, 1984</b>                             | USA                          | Health facility      | NR                               | 27 <sup>†</sup> (17-39)                                   | Mixed            | CT, TV                                               | NR                              | Yes                             |
| <b>McDonald,<br/>1994</b>                        | Australia                    | Health facility      | NR                               | NR                                                        | NR               | NR                                                   | NR                              | NR                              |
| <b>Menard, 2010</b>                              | France                       | Health facility      | Urban                            | NR                                                        | NR               | BV                                                   | NR                              | No                              |
| <b>Nguyen, 2004</b>                              | Switzerland                  | Health facility      | Urban                            | 19-42                                                     | NR               | NR                                                   | NR                              | No                              |
| <b>Odendaal, 2002</b>                            | South Africa                 | Health facility      | Urban                            | NR                                                        | NR               | CT, BV, NG                                           | 161/395<br>(40.8%)              | No                              |

**Supporting information**For peer review only - <http://bmjopen.bmj.com/site/about/guidelines.xhtml>

| First author, year of publication | Location of study | Study setting   | Urban/ rural location | Mean <sup>†</sup> / median age years (range) | Ethnicity | Other infections included/ (excluded) | Smokers included (%) | Multiple pregnancies |
|-----------------------------------|-------------------|-----------------|-----------------------|----------------------------------------------|-----------|---------------------------------------|----------------------|----------------------|
| Payne, 2016                       | Australia         | Health facility | Urban                 | 30 (18-43)                                   | Mixed     | NR                                    | 21/191 (11%)         | No                   |
| Payne, 2020                       | Australia         | Health facility | Urban                 | NR                                           | Mixed     | (HIV) ‡                               | 135/ 1000 (13.5%)    | No                   |
| Peretz, 2020                      | Israel            | Health facility | Urban                 | 29.8 <sup>†</sup>                            | Mixed     | NR ‡                                  | NR                   | Yes                  |
| Perni, 2004                       | NR                | Health facility | NR/unclear            | 18-44                                        | Mixed     | NR                                    | NR                   | No                   |
| Rittenschober-Böhm, 2018          | Austria           | Health facility | Urban                 | 30.3 <sup>†</sup>                            | NR        | BV                                    | 670/3643 (18.4%)     | No                   |
| Schwab, 2015                      | Indonesia         | Health facility | Urban                 | 26.6 <sup>†</sup> (17-42)                    | NR        | CT, BV, NG                            | NR                   | NR                   |
| Sperling, 1988                    | USA               | Health facility | Urban                 | NR                                           | Mixed     | NR                                    | NR                   | NR                   |
| Usui, 2002                        | Japan             | Health facility | Urban                 | NR                                           | Asian     | CT                                    | NR                   | No                   |

**Abbreviations:** BV, bacterial vaginosis; CT, *Chlamydia trachomatis*; HIV, human immunodeficiency virus; NG, *Neisseria gonorrhoeae*; NR, not reported;

infections; TV, *Trichomonas vaginalis*; USA, United States of America;

<sup>†</sup>reported mean age; <sup>‡</sup>Detected *Mycoplasma genitalium*

**Supporting information**

**Table S4.2** Study setting and socio-demographics, case-control studies (n=25)

| <b>First author,<br/>year of<br/>publication</b> | <b>Location of<br/>study</b> | <b>Study setting</b> | <b>Urban<br/>/rural<br/>location</b> | <b>Mean<sup>†</sup>/ median<br/>age years<br/>(range)</b> | <b>Ethnicity</b> | <b>Other infections<br/>included (or excluded)</b>          | <b>Smokers<br/>included/ (%)</b> | <b>Multiple<br/>pregnancies</b> |
|--------------------------------------------------|------------------------------|----------------------|--------------------------------------|-----------------------------------------------------------|------------------|-------------------------------------------------------------|----------------------------------|---------------------------------|
| <b>Ahmadi, 2014</b>                              | Iran                         | Health facility      | Urban                                | 19-43                                                     | NR               | NR                                                          | 3/218 (1.4)                      | NR                              |
| <b>González<br/>Bosquet, 2006</b>                | NR                           | Health facility      | NR/ unclear                          | NR                                                        | NR               | CA, BV-associated<br>bacteria, <i>E. coli</i> , GBS,<br>TV, | NR                               | No                              |
| <b>Cassell, 1983</b>                             | USA                          | Health facility      | Urban                                | NR                                                        | White,<br>Black  | NR                                                          | NR                               | NR                              |
| <b>Chua, 1999</b>                                | Malaysia                     | Health facility      | Urban                                | NR                                                        | NR               | NR                                                          | NR                               | No                              |
| <b>Daskalakis, 2009</b>                          | NR                           | Health facility      | Urban                                | NR                                                        | NR               | NR                                                          | 36/144 (25)                      | No                              |
| <b>Embree,</b>                                   | Canada                       | Health facility      | Urban                                | 14-45                                                     | NR               | NR                                                          | NR                               | Yes                             |
| <b>Farhadifar, 2016</b>                          | Iran                         | Health facility      | Urban                                | 25 (19-43)                                                | NR               | NR                                                          | NR                               | NR                              |
| <b>Freitas, 2018</b>                             | Canada                       | Health facility      | Urban                                | 33 <sup>†</sup> (21-45)                                   | Mixed            | NR                                                          | 4/216 (2.3%)                     | NR                              |
| <b>Harada, 2008</b>                              | Japan                        | Health facility      | Urban                                | NR                                                        | NR               | NR                                                          | NR                               | No                              |

|    |                               |           |                 |             |            |       |            |              |    |
|----|-------------------------------|-----------|-----------------|-------------|------------|-------|------------|--------------|----|
| 1  |                               |           |                 |             |            |       |            |              |    |
| 2  |                               |           |                 |             |            |       |            |              |    |
| 3  | <b>Hillier, 1988</b>          | USA       | Health facility | Urban       | NR         | NR    | CT, TV, BV | NR           | No |
| 4  |                               |           |                 |             |            |       |            |              |    |
| 5  | <b>Holst, 1994</b>            | Sweden    | Health facility | Urban       | NR         | NR    | CT, BV, NG | 20/49 (40.8) | No |
| 6  |                               |           |                 |             |            |       |            |              |    |
| 7  | <b>Jalava, 2002</b>           | NR        | Health facility | NR/ unclear | NR         | NR    | (CT)       | NR           | NR |
| 8  |                               |           |                 |             |            |       |            |              |    |
| 9  | <b>Jones, 2009</b>            | United    | Health facility | Urban       | NR         | NR    | NR         | NR           | No |
| 10 |                               |           |                 |             |            |       |            |              |    |
| 11 |                               | Kingdom   |                 |             |            |       |            |              |    |
| 12 |                               |           |                 |             |            |       |            |              |    |
| 13 | <b>Kacerovsky,</b>            | NR        | Health facility | NR/ unclear | 26 (19-38) | NR    | NR         | NR           | No |
| 14 |                               |           |                 |             |            |       |            |              |    |
| 15 | <b>2009</b>                   |           |                 |             |            |       |            |              |    |
| 16 |                               |           |                 |             |            |       |            |              |    |
| 17 | <b>Kafetzis, 2004</b>         | Greece    | Health facility | Urban       | NR         | NR    | NR         | NR           | NR |
| 18 |                               |           |                 |             |            |       |            |              |    |
| 19 | <b>Kumar, 2006</b>            | India     | Health facility | Urban       | NR         | NR    | BV         | NR           | NR |
| 20 |                               |           |                 |             |            |       |            |              |    |
| 21 | <b>McDonald, 1992</b>         | Australia | Health facility | Urban       | NR         | NR    | NR         | 839/ 2190    | NR |
| 22 |                               |           |                 |             |            |       |            |              |    |
| 23 |                               |           |                 |             |            |       |            | (39.8%)      |    |
| 24 |                               |           |                 |             |            |       |            |              |    |
| 25 | <b>Mitsunari, 2005</b>        | Japan     | Health facility | Urban       | NR         | Asian | (CT)       | NR           | No |
| 26 |                               |           |                 |             |            |       |            |              |    |
| 27 | <b>Montenegro,</b>            | Colombia  | Health facility | Urban       | NR         | NR    | NR         | NR           | NR |
| 28 |                               |           |                 |             |            |       |            |              |    |
| 29 | <b>2019</b>                   |           |                 |             |            |       |            |              |    |
| 30 |                               |           |                 |             |            |       |            |              |    |
| 31 | <b>Munday, 1984</b>           | United    | Health facility | Urban       | NR         | Mixed | CT         | NR           | NR |
| 32 |                               |           |                 |             |            |       |            |              |    |
| 33 |                               | Kingdom   |                 |             |            |       |            |              |    |
| 34 |                               |           |                 |             |            |       |            |              |    |
| 35 |                               |           |                 |             |            |       |            |              |    |
| 36 |                               |           |                 |             |            |       |            |              |    |
| 37 |                               |           |                 |             |            |       |            |              |    |
| 38 |                               |           |                 |             |            |       |            |              |    |
| 39 |                               |           |                 |             |            |       |            |              |    |
| 40 |                               |           |                 |             |            |       |            |              |    |
| 41 |                               |           |                 |             |            |       |            |              |    |
| 42 |                               |           |                 |             |            |       |            |              |    |
| 43 | <b>Supporting information</b> |           |                 |             |            |       |            |              |    |
| 44 |                               |           |                 |             |            |       |            |              |    |
| 45 |                               |           |                 |             |            |       |            |              |    |
| 46 |                               |           |                 |             |            |       |            |              |    |

|                       |                     |                 |            |       |       |        |               |    |
|-----------------------|---------------------|-----------------|------------|-------|-------|--------|---------------|----|
| <b>Oliveira, 2020</b> | Brazil              | Health facility | Urban      | 27.3  | Mixed | NG ‡   | 5/109 (4.6)   | NR |
| <b>Payne, 2014</b>    | China,<br>Australia | Health facility | NR/unclear | 17-49 | Mixed | NR     | 69/972 (7.1%) | No |
| <b>Povlsen, 2001</b>  | Denmark             | Health facility | Urban      | NR    | NR    | BV     | NR            | No |
| <b>Toth, 1992</b>     | United<br>Kingdom   | Health facility | Urban      | NR    | NR    | CT, TV | NR            | NR |
| <b>Yoon, 2001*</b>    | South Korea         | Health facility | Urban      | NR    | NR    | NR     | NR            | No |

**Abbreviations:** BV, bacterial vaginosis; CA, *Candida albicans*; CT, *Chlamydia trachomatis*; HIV, human immunodeficiency virus; NG, *Neisseria gonorrhoeae*;

NR, not reported; TV, *Trichomonas vaginalis*; USA, United States of America

† Reported mean age; ‡ detected *Mycoplasma genitalium*

**Table S4.3** Study setting and socio-demographics, cross-sectional studies (n=6)

| <b>First author,<br/>year of<br/>publication</b> | <b>Location<br/>of study</b> | <b>Study setting</b> | <b>Urban<br/>/rural<br/>location</b> | <b>Mean<sup>†</sup>/<br/>median age<br/>years (range)</b> | <b>Ethnicity</b> | <b>Other infections<br/>included (or excluded)</b> | <b>Smokers<br/>included/<br/>(%)</b> | <b>Multiple<br/>pregnancies</b> |
|--------------------------------------------------|------------------------------|----------------------|--------------------------------------|-----------------------------------------------------------|------------------|----------------------------------------------------|--------------------------------------|---------------------------------|
| <b>Abele-Horn, 2000</b>                          | Germany                      | Health facility      | Urban                                | NR                                                        | Mixed            | (BV, CT, NG, TV, yeast)                            | NR                                   | NR                              |
| <b>Grattard, 1995</b>                            | France                       | Health facility      | Urban                                | NR                                                        | NR               | NR                                                 | NR                                   | NR                              |
| <b>Kundsinn, 1984</b>                            | USA                          | Health facility      | Urban                                | NR                                                        | Mixed            | NR                                                 | 105/801<br>(31.4%)                   | Yes                             |
| <b>McCormack,<br/>1975</b>                       | USA                          | Health facility      | Urban                                | 23.6 <sup>†</sup>                                         | Mixed            | NR                                                 | NR                                   | Yes                             |
| <b>Nasution, 2007</b>                            | NR                           | Health facility      | NR/ unclear                          | 24-38                                                     | Asian            | CT, NG                                             | NR                                   | NR                              |
| <b>Sweeney, 2016</b>                             | USA                          | Health facility      | Urban                                | NR                                                        | Mixed            | NR                                                 | NR                                   | Yes                             |

**Abbreviations:** BV, bacterial vaginosis; CT, *Chlamydia trachomatis*; HIV, human immunodeficiency virus; NG, *Neisseria gonorrhoeae*; NR, not reported; TV, *Trichomonas vaginalis*; UK, United Kingdom; USA, United States of America

<sup>†</sup> Reported mean age



**Table S5** Studies that reported on bacterial vaginosis or sexually transmitted infections and reported associations with adverse birth outcomes

| First author,<br>publication year,<br>reference<br>number* | Study population                                                   | Organism/<br>outcome | OR (95% CI)       | Reported associations with genital mycoplasmas                                                                                                                                                                                                                                                                                                                                                                                                                                                                   |
|------------------------------------------------------------|--------------------------------------------------------------------|----------------------|-------------------|------------------------------------------------------------------------------------------------------------------------------------------------------------------------------------------------------------------------------------------------------------------------------------------------------------------------------------------------------------------------------------------------------------------------------------------------------------------------------------------------------------------|
| <b>Donders, 2009</b> <sup>34</sup>                         | Cohort study: 759<br>women; 55 PTB; 64<br>BV; 14 <i>M. hominis</i> | BV/PTB               | 2.43 (1.1, 4.7)   | Association between lactobacilli and PTB, and between BV and PTB reported as primary analysis. Proportion of women with <i>M. hominis</i> but no BV reported (0.5% of 759), but association between <i>M. hominis</i> and PTB in absence of BV could not be calculated from data presented. Discussion includes, "In the literature, the presence of <i>M. hominis</i> has generally been related to an increased risk of miscarriage, and premature delivery if found in combination with bacterial vaginosis." |
| <b>Hillier, 1988</b> <sup>57</sup>                         | Case-control study: 94<br>women; 38 PTB; 28                        | BV/PTB               | 3.31 (1.20, 9.24) | Association between organisms in chorioamnion and PTB reported as primary analysis. BV measured in vaginal                                                                                                                                                                                                                                                                                                                                                                                                       |

**Supporting information**

1  
2  
3  
4  
5  
6  
7  
8  
9  
10  
11  
12  
13  
14  
15  
16  
17  
18  
19  
20  
21  
22  
23  
24  
25  
26  
27  
28  
29  
30  
31  
32  
33  
34  
35  
36  
37  
38  
39  
40  
41  
42  
43  
44  
45  
46

| First author, publication year, reference number* | Study population                                                   | Organism/ outcome                        | OR (95% CI)                                                 | Reported associations with genital mycoplasmas                                                                                                                                                                                                                                                                                                                                                               |
|---------------------------------------------------|--------------------------------------------------------------------|------------------------------------------|-------------------------------------------------------------|--------------------------------------------------------------------------------------------------------------------------------------------------------------------------------------------------------------------------------------------------------------------------------------------------------------------------------------------------------------------------------------------------------------|
|                                                   | BV; 29<br><i>U. urealyticum</i> ; 5 <i>M. hominis</i>              |                                          |                                                             | smears. Association between genital mycoplasmas and PTB in absence of BV could not be calculated from data presented.                                                                                                                                                                                                                                                                                        |
| Hillier, 1995 <sup>31</sup>                       | Cohort study: 9105 women; 423 PTB; 1392 BV; 2805 <i>M. hominis</i> | BV/ PTB<br>MH+, BV+/ PTB<br>MH+, BV-/PTB | 1.60 (1.25, 2.03)<br>1.58 (0.94, 2.77)<br>1.18 (0.91, 1.52) | Association between BV and PTB of low birthweight infants reported as primary analysis. Raw data not available for association between <i>M. hominis</i> and PTB, but reported in text and can be extracted from bar chart of ORs for PTB, stratified by <i>M. hominis</i> , bacteroides and BV. OR for BV and BV with <i>M. hominis</i> similar, and stronger than association for <i>M. hominis</i> alone. |

| First author,<br>publication year,<br>reference<br>number* | Study population                                                        | Organism/<br>outcome | OR (95% CI)         | Reported associations with genital mycoplasmas                                                                                                                                                                                          |
|------------------------------------------------------------|-------------------------------------------------------------------------|----------------------|---------------------|-----------------------------------------------------------------------------------------------------------------------------------------------------------------------------------------------------------------------------------------|
| <b>Kumar, 2006</b> <sup>71</sup>                           | Case-control study:<br>120 women; 60 PTB;<br>31 BV; 6 <i>M. hominis</i> | BV/PTB               | 5.05 (1.97, 12.95)  | Association between BV and PTB reported as primary analysis. Association between <i>M. hominis</i> and PTB in absence of BV could not be calculated from data presented. Discussion does not mention <i>M. hominis</i> .                |
| <b>Menard, 2010</b> <sup>41</sup>                          | Cohort study: 90<br>women; 36 PTB; 2<br>BV; 10 <i>M. hominis</i>        |                      |                     | Association between quantities of BV-associated bacteria and PTB reported as primary analysis. Association between <i>M. hominis</i> and PTB in absence of BV could not be calculated from data presented.                              |
| <b>Odendaal, 2002</b> <sup>50</sup>                        | Cohort study as sub-<br>study of a randomised<br>controlled trial: 395  | MH/BV                | 10.21 (5.63, 18.65) | Association between <i>M. hominis</i> and PTB reported as primary analysis. Association between <i>M. hominis</i> and BV reported, but not association between BV and PTB. Discussion includes, "It is also possible that the BV is not |

1  
2  
3  
4  
5  
6  
7  
8  
9  
10  
11  
12  
13  
14  
15  
16  
17  
18  
19  
20  
21  
22  
23  
24  
25  
26  
27  
28  
29  
30  
31  
32  
33  
34  
35  
36  
37  
38  
39  
40  
41  
42  
43  
44  
45  
46

| First author, publication year, reference number* | Study population                                                               | Organism/ outcome                     | OR (95% CI)                                                | Reported associations with genital mycoplasmas                                                                                                                                                                                                                                                                                                                  |
|---------------------------------------------------|--------------------------------------------------------------------------------|---------------------------------------|------------------------------------------------------------|-----------------------------------------------------------------------------------------------------------------------------------------------------------------------------------------------------------------------------------------------------------------------------------------------------------------------------------------------------------------|
|                                                   | women; 119 PTB; 132 BV; 83 <i>M. hominis</i>                                   |                                       |                                                            | directly involved in the causation of premature labour but that it is only a marker of a more important underlying condition such as <i>M. hominis</i> infection,”                                                                                                                                                                                              |
| <b>Povlsen, 2001</b> <sup>64</sup>                | Nested case-control study: 484 women; 84 PTB; 70 BV; 280 <i>U. urealyticum</i> | BV/PTB<br>UU+, BV+/PTB<br>UU+/PV-/PTB | 0.77 (0.33, 1.6)<br>0.47 (0.09, 3.31)<br>1.15 (0.67, 1.98) | Associations between <i>U. urealyticum</i> biovars and PTB reported as primary analysis. Numbers, stratified by BV status and low birth weight reported. Discussion mentions that <i>U. urealyticum</i> and BV were associated with each other overall, but that this association was only seen in women who delivered at term and was not associated with PTB. |
| <b>Rittenschober-Bohm, 2018</b> <sup>46</sup>     | Cohort study: 3,643 women; 292 PTB; 279                                        | BV/PTB<br>UP-,BV-/PTB                 | Crude 1.7 (1.3, 2.2)<br>Adjusted 1.6 (1.1, 2.4)            | Associations between <i>Ureaplasma</i> spp. and PTB reported as primary analysis. Associations with <i>U. parvum</i> , stratified by BV status and adjusted for maternal age, diagnosis of vaginal                                                                                                                                                              |

Supporting information

| 1<br>2<br>3<br>4<br>5<br>6<br>7<br>8<br>9<br>10<br>11 | 12                               | 13                         | 14                      | 15                                                                      | 16 | 17 | 18 | 19 | 20 | 21 | 22 | 23 | 24 | 25 |
|-------------------------------------------------------|----------------------------------|----------------------------|-------------------------|-------------------------------------------------------------------------|----|----|----|----|----|----|----|----|----|----|
| 12                                                    | 13                               | 14                         | 15                      | 16                                                                      | 17 | 18 | 19 | 20 | 21 | 22 | 23 | 24 | 25 | 26 |
| 26                                                    | 27                               | 28                         | 29                      | 30                                                                      | 31 | 32 | 33 | 34 | 35 | 36 | 37 | 38 | 39 | 40 |
| 41                                                    | 42                               | 43                         | 44                      | 45                                                                      | 46 | 47 | 48 | 49 | 50 | 51 | 52 | 53 | 54 | 55 |
| 12                                                    | BV; 1,347 <i>U. parvum</i> ;     | UP+,BV-/PTB                | Adjusted 1.6 (1.2, 2.1) | candida, smoking and history of previous PTB. Stratified                |    |    |    |    |    |    |    |    |    |    |
| 13                                                    | 214 <i>U. urealyticum</i>        | UP-,BV+/PTB                | Adjusted 1.6 (1.1, 2.3) | associations with <i>U. urealyticum</i> not reported on basis of        |    |    |    |    |    |    |    |    |    |    |
| 14                                                    |                                  | UP+,BV+/PTB                | Adjusted 2.6 (1.7, 4.0) | univariable analysis (OR 1.4, 95% CI 0.8, 2.2). Discussion              |    |    |    |    |    |    |    |    |    |    |
| 15                                                    |                                  |                            |                         | does not mention potential associations between both BV                 |    |    |    |    |    |    |    |    |    |    |
| 16                                                    |                                  |                            |                         | and <i>Ureaplasma</i> spp.                                              |    |    |    |    |    |    |    |    |    |    |
| 17                                                    |                                  |                            |                         |                                                                         |    |    |    |    |    |    |    |    |    |    |
| 18                                                    |                                  |                            |                         |                                                                         |    |    |    |    |    |    |    |    |    |    |
| 19                                                    |                                  |                            |                         |                                                                         |    |    |    |    |    |    |    |    |    |    |
| 20                                                    |                                  |                            |                         |                                                                         |    |    |    |    |    |    |    |    |    |    |
| 21                                                    |                                  |                            |                         |                                                                         |    |    |    |    |    |    |    |    |    |    |
| 22                                                    |                                  |                            |                         |                                                                         |    |    |    |    |    |    |    |    |    |    |
| 23                                                    |                                  |                            |                         |                                                                         |    |    |    |    |    |    |    |    |    |    |
| 24                                                    |                                  |                            |                         |                                                                         |    |    |    |    |    |    |    |    |    |    |
| 25                                                    |                                  |                            |                         |                                                                         |    |    |    |    |    |    |    |    |    |    |
| 26                                                    | <b>Schwab, 2015<sup>52</sup></b> | Cohort study: 62           | None reported           | Descriptive study of infections in pregnancy. Association               |    |    |    |    |    |    |    |    |    |    |
| 27                                                    |                                  | women; 23 PTB; 13          |                         | between <i>M. hominis</i> , <i>U. urealyticum</i> and PTB reported, but |    |    |    |    |    |    |    |    |    |    |
| 28                                                    |                                  | BV; 13 <i>M. hominis</i> ; |                         | not association between BV and PTB.                                     |    |    |    |    |    |    |    |    |    |    |
| 29                                                    |                                  | 22 <i>U. urealyticum</i>   |                         |                                                                         |    |    |    |    |    |    |    |    |    |    |
| 30                                                    |                                  |                            |                         |                                                                         |    |    |    |    |    |    |    |    |    |    |
| 31                                                    |                                  |                            |                         |                                                                         |    |    |    |    |    |    |    |    |    |    |
| 32                                                    |                                  |                            |                         |                                                                         |    |    |    |    |    |    |    |    |    |    |
| 33                                                    |                                  |                            |                         |                                                                         |    |    |    |    |    |    |    |    |    |    |
| 34                                                    |                                  |                            |                         |                                                                         |    |    |    |    |    |    |    |    |    |    |
| 35                                                    |                                  |                            |                         |                                                                         |    |    |    |    |    |    |    |    |    |    |

35  
36 **Abbreviations:** BV, bacterial vaginosis; CI, confidence interval; *M. hominis*, *Mycoplasma hominis*; PTB, premature birth; *U. parvum*, *Ureaplasma parvum*;  
37 *U. urealyticum*, *Ureaplasma urealyticum*.

38 \* Study reference is the reference number cited in the main manuscript  
39  
40  
41  
42

**Table S6.1** Risk of bias assessment, cohort studies (n=26)

| Questions                                                                                       | Agger,<br>2014 | Berman,<br>1987 | Braun,<br>1971 | Donders,<br>2009 | Gerber,<br>2003 |
|-------------------------------------------------------------------------------------------------|----------------|-----------------|----------------|------------------|-----------------|
| 1) The method of allocation to exposure groups was unrelated to potential confounding factors   | NA             | NA              | NA             | NA               | NA              |
| 2) Attempts made within design or analysis to balance both groups for potential confounders.    | Yes            | Unclear         | Unclear        | Unclear          | Unclear         |
| 3) The groups were comparable at baseline, including all major confounding factors.             | No             | Yes             | Unclear        | Yes              | Unclear         |
| 4) Based on above answers, was selection bias present?                                          | No             | Low             | Unclear        | Unclear          | Unclear         |
| 5) If so, what is the likely direction of its effect?                                           | Unclear        | Unclear         | Unclear        | Unclear          | Unclear         |
| 6) The comparison groups received the same care and support apart from the exposure(s) studied. | Yes            | Unclear         | Unclear        | Yes              | Unclear         |
| 7) Participants receiving care and support were kept 'blind' to intervention allocation.        | NA             | NA              | NA             | NA               | NA              |

**Supporting information**

| Questions                                                                                | Agger,<br>2014      | Berman,<br>1987    | Braun,<br>1971   | Donders,<br>2009 | Gerber,<br>2003   |
|------------------------------------------------------------------------------------------|---------------------|--------------------|------------------|------------------|-------------------|
| 8) Individuals administering care, support were kept 'blind' to intervention allocation. | NA                  | NA                 | NA               | NA               | NA                |
| 9) Based on above answers, was performance bias present?                                 | Unclear             | Unclear            | Unclear          | Unclear          | Unclear           |
| 10) If so, what is the likely direction of its effect?                                   | Unclear             | Unclear            | Unclear          | Unclear          | Unclear           |
| 11) All groups followed up for an equal length of time?                                  | Low                 | Low                | Low              | Low              | Low               |
| 12) Number of participants did not complete the intervention in each group?              | NA                  | NA                 | NA               | NA               | NA                |
| 13) The groups were comparable for intervention completion.                              | NA                  | NA                 | Unclear          | NA               | NA                |
| 14) For how many participants were no outcome data available? <sup>‡</sup>               | 107/783,<br>(13.7%) | 104/1204<br>(8.6%) | 203/688<br>(30%) | 42/801<br>(5.2%) | 63/317<br>(19.9%) |
| 15) Were groups comparable for outcome data?                                             | Unclear             | Unclear            | Unclear          | Yes              | Unclear           |
| 16) Based on above answers, was attrition bias present?                                  | Unclear             | Unclear            | Unclear          | Unclear          | Unclear           |
| 17) If so, what is the likely direction of its effect?                                   | Unclear             | Unclear            | Unclear          | Unclear          | Unclear           |
| 18) The study had an appropriate length of follow-up.                                    | Yes                 | Yes                | Yes              | Yes              | Yes               |
| 19) The study used a precise definition of outcome.                                      | Yes                 | Unclear            | No               | Yes              | Yes               |

### Supporting information

For peer review only - <http://bmjopen.bmj.com/site/about/guidelines.xhtml>

| Questions                                                                          | Agger,<br>2014 | Berman,<br>1987 | Braun,<br>1971 | Donders,<br>2009 | Gerber,<br>2003 |
|------------------------------------------------------------------------------------|----------------|-----------------|----------------|------------------|-----------------|
| 20) A valid, reliable method used to determine the outcome?                        | Unclear        | Unclear         | No             | Yes              | Yes             |
| 21) Investigators were kept 'blind' to participants' exposure to the intervention. | NA             | NA              | NA             | NA               | NA              |
| 22) Investigators were kept 'blind' to other important confounding factors.        | Unclear        | Unclear         | Unclear        | Unclear          | Unclear         |
| 23) Based on above answers, was detection bias present?                            | Unclear        | Unclear         | Unclear        | No               | Unclear         |
| 24) If so, what is the likely direction of its effect?                             | Unclear        | Unclear         | Unclear        | NA               | Unclear         |
| <b>25) Overall assessment of internal validity<sup>a</sup></b>                     | +              | -               | +              | +                | +               |
| <b>26) Overall assessment of external validity<sup>a</sup></b>                     | +              | +               | -              | +                | -               |

**Abbreviations:** High, high risk of bias; Low, low risk of bias; NA, not applicable; Unclear, unclear of risk of bias; ‡, both groups combined unless stated; <sup>a</sup>++, all or most of checklist criteria fulfilled; + some of checklist criteria fulfilled; - few or no checklist criteria fulfilled.



**Table S6.1** Risk of bias assessment, cohort studies (n=26) (continued)

| Questions                                                                                       | Govender,<br>2009 | Harrison,<br>1983 | Hillier,<br>1995 | Kataoka,<br>2006 | Koucky,<br>2016 |
|-------------------------------------------------------------------------------------------------|-------------------|-------------------|------------------|------------------|-----------------|
| 1) The method of allocation to exposure groups was unrelated to potential confounding factors   | NA                | NA                | NA               | NA               | NA              |
| 2) Attempts made within design or analysis to balance both groups for potential confounders.    | Unclear           | Unclear           | Unclear          | Yes              | Unclear         |
| 3) The groups were comparable at baseline, including all major confounding factors.             | Unclear           | Unclear           | Unclear          | No               | Unclear         |
| 4) Based on above answers, was selection bias present?                                          | Unclear           | Unclear           | Unclear          | Unclear          | Unclear         |
| 5) If so, what is the likely direction of its effect?                                           | Unclear           | Unclear           |                  | Unclear          | Unclear         |
| 6) The comparison groups received the same care and support apart from the exposure(s) studied. | Unclear           | Yes               | Yes              | Yes              | Yes             |
| 7) Participants receiving care and support were kept 'blind' to intervention allocation.        | NA                | NA                | NA               | NA               | NA              |

**Supporting information**

| Questions                                                                                   | Govender,<br>2009 | Harrison,<br>1983                        | Hillier,<br>1995       | Kataoka,<br>2006    | Koucky,<br>2016 |
|---------------------------------------------------------------------------------------------|-------------------|------------------------------------------|------------------------|---------------------|-----------------|
| 8) Individuals administering care and support were kept 'blind' to intervention allocation. | NA                | NA                                       | NA                     | NA                  | NA              |
| 9) Based on above answers, was performance bias present?                                    | Unclear           | Unclear                                  | Unclear                | Unclear             | Unclear         |
| 10) If so, what is the likely direction of its effect?                                      | Unclear           | Unclear                                  | Unclear                | Unclear             | Unclear         |
| 11) All groups followed up for an equal length of time?                                     | Low               | Low                                      | Low                    | Low                 | Low             |
| 12) Number of participants did not complete the intervention in each group?                 | NA                | NA                                       | Na                     | NA                  | NA              |
| 13) The groups were comparable for intervention completion.                                 | NA                | NA                                       | NA                     | NA                  | NA              |
| 14) For how many participants were no outcome data available? <sup>‡</sup>                  | 0/199 (0%)        | SA (13/361),<br>3.6%; PND<br>(0/467, 0%) | 1292/1039<br>7 (12.4%) | 163/1040<br>(15.7%) | 0/36 (0%)       |
| 15) Were groups comparable for outcome data?                                                | Unclear           | Unclear                                  | No                     | Unclear             | Yes             |
| 16) Based on above answers, was attrition bias present?                                     | Unclear           | Unclear                                  | Unclear                | Unclear             | Unclear         |
| 17) If so, what is the likely direction of its effect?                                      | Unclear           | Unclear                                  | Unclear                | Unclear             | Unclear         |
| 18) The study had an appropriate length of follow-up.                                       | Yes               | Yes                                      | Yes                    | Yes                 | Yes             |

### Supporting information

For peer review only - <http://bmjopen.bmj.com/site/about/guidelines.xhtml>

| Questions                                                                          | Govender,<br>2009 | Harrison,<br>1983 | Hillier,<br>1995 | Kataoka,<br>2006 | Koucky,<br>2016 |
|------------------------------------------------------------------------------------|-------------------|-------------------|------------------|------------------|-----------------|
| 19) The study used a precise definition of outcome.                                | Yes               | No                | Yes              | Yes              | Yes             |
| 20) A valid, reliable method used to determine the outcome?                        | Unclear           | Unclear           | No               | Yes              | Yes             |
| 21) Investigators were kept 'blind' to participants' exposure to the intervention. | NA                | NA                | NA               | NA               | NA              |
| 22) Investigators were kept 'blind' to other important confounding factors.        | Unclear           | Unclear           | Unclear          | Unclear          | Unclear         |
| 23) Based on above answers, was detection bias present?                            | Unclear           | Unclear           | Unclear          | No               | Unclear         |
| 24) If so, what is the likely direction of its effect?                             | Unclear           | Unclear           | Unclear          | NA               | Unclear         |
| <b>25) Overall assessment of internal validity<sup>a</sup></b>                     | -                 | -                 | -                | +                | +               |
| <b>26) Overall assessment of external validity<sup>a</sup></b>                     | -                 | -                 | -                | +                | +               |

**Abbreviations:** High, high risk of bias; Low, low risk of bias; NA, not applicable; Unclear, unclear of risk of bias;

‡, both groups combined unless stated; <sup>a</sup>++, all or most of checklist criteria fulfilled; + some of checklist criteria fulfilled; - few or no checklist criteria fulfilled.

**Table S6.1** Risk of bias assessment, cohort studies (n=26) (continued)

| Questions                                                                                       | Kwak,<br>2014 | Lee,<br>2016 | Luton,<br>1994 | McDonald,<br>1994 | Menard,<br>2010 |
|-------------------------------------------------------------------------------------------------|---------------|--------------|----------------|-------------------|-----------------|
| 1) The method of allocation to exposure groups was unrelated to potential confounding factors   | NA            | NA           | NA             | NA                | NA              |
| 2) Attempts made within design or analysis to balance both groups for potential confounders.    | Unclear       | Unclear      | Yes            | Yes               | Unclear         |
| 3) The groups were comparable at baseline, including all major confounding factors.             | Unclear       | Unclear      | Yes            | Unclear           | Unclear         |
| 4) Based on above answers, was selection bias present?                                          | Unclear       | Unclear      | Low            | Unclear           | Unclear         |
| 5) If so, what is the likely direction of its effect?                                           | Unclear       | Unclear      | Unclear        | Unclear           | Unclear         |
| 6) The comparison groups received the same care and support apart from the exposure(s) studied. | Unclear       | Unclear      | Yes            | Unclear           | Yes             |
| 7) Participants receiving care and support were kept ‘blind’ to intervention allocation.        | NA            | NA           | NA             | NA                | NA              |
| 8) Individuals administering care and support were kept ‘blind’ to intervention allocation.     | NA            | NA           | NA             | NA                | NA              |
| 9) Based on above answers, was performance bias present?                                        | Unclear       | Unclear      | Unclear        | Unclear           | Unclear         |

**Supporting information**

| Questions                                                                   | Kwak,<br>2014 | Lee,<br>2016   | Luton,<br>1994  | McDonald,<br>1994                                   | Menard,<br>2010 |
|-----------------------------------------------------------------------------|---------------|----------------|-----------------|-----------------------------------------------------|-----------------|
| 10) If so, what is the likely direction of its effect?                      | Unclear       | Unclear        | Unclear         | Unclear                                             | Unclear         |
| 11) All groups followed up for an equal length of time?                     | Low           | Low            | Low             | Low                                                 | Low             |
| 12) Number of participants did not complete the intervention in each group? | NA            | NA             | NA              | NA                                                  | NA              |
| 13) The groups were comparable for intervention completion.                 | NA            | NA             | NA              | NA                                                  | NA              |
| 14) For how many participants were no outcome data available? <sup>‡</sup>  | 0 (0%)        | 0/1035<br>(0%) | 37/218<br>(17%) | Control<br>182/649, (28%);<br>Cases 42/135<br>(31%) | 0 (0%)          |
| 15) Were groups comparable for outcome data?                                | Yes           | Yes            | No              | Unclear                                             | Yes             |
| 16) Based on above answers, was attrition bias present?                     | Low           | Low            | Unclear         | Unclear                                             | Unclear         |
| 17) If so, what is the likely direction of its effect?                      | Unclear       | Unclear        | Unclear         | Unclear                                             | Unclear         |
| 18) The study had an appropriate length of follow-up.                       | Yes           | Yes            | Yes             | Yes                                                 | Yes             |
| 19) The study used a precise definition of outcome.                         | Yes           | No             | Yes             | Yes                                                 | Yes             |
| 20) A valid, reliable method used to determine the outcome?                 | Yes           | No             | Yes             | No                                                  | Yes             |

### Supporting information

For peer review only - <http://bmjopen.bmj.com/site/about/guidelines.xhtml>

1  
2  
3  
4  
5  
6  
7  
8  
9  
10  
11  
12  
13  
14  
15  
16  
17  
18  
19  
20  
21  
22  
23  
24  
25  
26  
27  
28  
29  
30  
31  
32  
33  
34  
35  
36  
37  
38  
39  
40  
41  
42  
43  
44  
45  
46

| Questions                                                                          | Kwak,<br>2014 | Lee,<br>2016 | Luton,<br>1994 | McDonald,<br>1994 | Menard,<br>2010 |
|------------------------------------------------------------------------------------|---------------|--------------|----------------|-------------------|-----------------|
| 21) Investigators were kept 'blind' to participants' exposure to the intervention. | NA            | NA           | NA             | Unclear           | NA              |
| 22) Investigators were kept 'blind' to other important confounding factors.        | Unclear       | Unclear      | Unclear        | Unclear           | NA              |
| 23) Based on above answers, was detection bias present?                            | No            | Yes          | Unclear        | Unclear           | No              |
| 24) If so, what is the likely direction of its effect?                             | NA            | Unclear      | Unclear        | Unclear           | NA              |
| <b>25) Overall assessment of internal validity<sup>a</sup></b>                     | +             | -            | -              | -                 | -               |
| <b>26) Overall assessment of external validity<sup>a</sup></b>                     | +             | -            | -              | -                 | -               |

**Abbreviations:** High, high risk of bias; Low, low risk of bias; NA, not applicable;Unclear, unclear of risk of bias.

‡, both groups combined unless stated; <sup>a</sup>++, all or most of checklist criteria fulfilled; + some of checklist criteria fulfilled; - few or no checklist criteria fulfilled.

**Table S6.1** Risk of bias assessment, cohort studies (n=26) (continued)

| Questions                                                                                       | Minkoff,<br>1984 | Nguyen,<br>2004 | Odendaal,<br>2002 | Payne,<br>2016 | Payne,<br>2020 |
|-------------------------------------------------------------------------------------------------|------------------|-----------------|-------------------|----------------|----------------|
| 1) The method of allocation to exposure groups was unrelated to potential confounding factors   | NA               | NA              | NA                | NA             | NA             |
| 2) Attempts made within design or analysis to balance both groups for potential confounders.    | Unclear          | Unclear         | Unclear           | Unclear        | No             |
| 3) The groups were comparable at baseline, including all major confounding factors.             | Unclear          | Unclear         | Unclear           | Unclear        | Unclear        |
| 4) Based on above answers, was selection bias present?                                          | Unclear          | Unclear         | Unclear           | Unclear        | Low            |
| 5) If so, what is the likely direction of its effect?                                           | Unclear          | Unclear         | Unclear           | Unclear        | Unclear        |
| 6) The comparison groups received the same care and support apart from the exposure(s) studied. | Unclear          | Unclear         | Yes               | Unclear        | Yes            |
| 7) Participants receiving care and support were kept 'blind' to intervention allocation.        | NA               | NA              | NA                | NA             | NA             |

| Questions                                                                                   | Minkoff,<br>1984                          | Nguyen,<br>2004   | Odendaal,<br>2002 | Payne,<br>2016   | Payne,<br>2020    |
|---------------------------------------------------------------------------------------------|-------------------------------------------|-------------------|-------------------|------------------|-------------------|
| 8) Individuals administering care and support were kept 'blind' to intervention allocation. | NA                                        | NA                | NA                | NA               | NA                |
| 9) Based on above answers, was performance bias present?                                    | Unclear                                   | Unclear           | Unclear           | Unclear          | Unclear           |
| 10) If so, what is the likely direction of its effect?                                      | Unclear                                   | Unclear           | Unclear           | Unclear          | Unclear           |
| 11) All groups followed up for an equal length of time?                                     | Low                                       | Low               | Low               | Low              | Low               |
| 12) Number of participants did not complete the intervention in each group?                 | NA                                        | NA                | NA                | NA               | NA                |
| 13) The groups were comparable for intervention completion.                                 | NA                                        | NA                | NA                | NA               | NA                |
| 14) For how many participants were no outcome data available? <sup>‡</sup>                  | PROM 45/233 (19.3%);<br>PTB 15/233 (6.4%) | 61/456<br>(13.4%) | 31/426<br>(7.3%)  | 15/206<br>(7.3%) | 6.4%<br>(64/1000) |
| 15) Were groups comparable for outcome data?                                                | Unclear                                   | Yes               | Yes               | Yes              | Unclear           |
| 16) Based on above answers, was attrition bias present?                                     | Unclear                                   | Low               | Unclear           | Unclear          | Low               |
| 17) If so, what is the likely direction of its effect?                                      | Unclear                                   | Unclear           | Unclear           | Unclear          | Unclear           |

### Supporting information



| Questions                                                                          | Minkoff,<br>1984 | Nguyen,<br>2004 | Odendaal,<br>2002 | Payne,<br>2016 | Payne,<br>2020 |
|------------------------------------------------------------------------------------|------------------|-----------------|-------------------|----------------|----------------|
| 18) The study had an appropriate length of follow-up.                              | Yes              | Yes             | Yes               | Yes            | Yes            |
| 19) The study used a precise definition of outcome.                                | Yes              | Yes             | Yes               | Yes            | Yes            |
| 20) A valid, reliable method used to determine the outcome?                        | Yes              | Unclear         | Yes               | Unclear        | Unclear        |
| 21) Investigators were kept 'blind' to participants' exposure to the intervention. | NA               | NA              | NA                | NA             | NA             |
| 22) Investigators were kept 'blind' to other important confounding factors.        | Unclear          | Unclear         | Unclear           | Unclear        | Unclear        |
| 23) Based on above answers, was detection bias present?                            | No               | Unclear         | Unclear           | Unclear        | No             |
| 24) If so, what is the likely direction of its effect?                             | NA               | Unclear         | Unclear           | Unclear        | NA             |
| <b>25) Overall assessment of internal validity<sup>a</sup></b>                     | -                | +               | +                 | +              | +              |
| <b>26) Overall assessment of external validity<sup>a</sup></b>                     | -                | +               | -                 | +              | +              |

**Abbreviations:** AO, adverse outcomes; High, high risk of bias; Low, low risk of bias; NA, not applicable; NK, not known; STI, sexually transmitted infections;

Unclear, unclear of risk of bias;

‡, both groups combined unless stated; <sup>a</sup>++, all or most of checklist criteria fulfilled; + some of checklist criteria fulfilled; - few or no checklist criteria fulfilled.

### Supporting information

For peer review only - <http://bmjopen.bmj.com/site/about/guidelines.xhtml>

**Table S6.1** Risk of bias assessment, cohort studies (n=26) (continued)

| Questions                                                                                       | Peretz, 2020 | Perni, 2004 | Rittenschober, 2018 | Schwab, 2015 | Sperling, 1988 | Usui, 2002 |
|-------------------------------------------------------------------------------------------------|--------------|-------------|---------------------|--------------|----------------|------------|
| 1) The method of allocation to exposure groups was unrelated to potential confounding factors   | NA           | NA          | NA                  | NA           | NA             | NA         |
| 2) Attempts made within design or analysis to balance both groups for potential confounders.    | Yes          | Unclear     | Yes                 | No           | Unclear        | Unclear    |
| 3) The groups were comparable at baseline, including all major confounding factors.             | Unclear      | Unclear     | Unclear             | Unclear      | Unclear        | Unclear    |
| 4) Based on above answers, was selection bias present?                                          | Unclear      | Unclear     | Low                 | High         | Unclear        | Unclear    |
| 5) If so, what is the likely direction of its effect?                                           | Unclear      | Unclear     | Unclear             | Unclear      | Unclear        | Unclear    |
| 6) The comparison groups received the same care and support apart from the exposure(s) studied. | Yes          | Unclear     | Unclear             | Unclear      | Yes            | Yes        |
| 7) Participants receiving care and support were kept 'blind' to intervention allocation.        | NA           | NA          | NA                  | NA           | NA             | NA         |

**Supporting information**

| Questions                                                                                   | Peretz, 2020                            | Perni, 2004      | Rittenschober, 2018  | Schwab, 2015      | Sperling, 1988  | Usui, 2002 |
|---------------------------------------------------------------------------------------------|-----------------------------------------|------------------|----------------------|-------------------|-----------------|------------|
| 8) Individuals administering care and support were kept 'blind' to intervention allocation. | NA                                      | NA               | NA                   | NA                | NA              | NA         |
| 9) Based on above answers, was performance bias present?                                    | Unclear                                 | Unclear          | Unclear              | Unclear           | Unclear         | Low        |
| 10) If so, what is the likely direction of its effect?                                      | Unclear                                 | Unclear          | Unclear              | Unclear           | Unclear         | NA         |
| 11) All groups followed up for an equal length of time?                                     | Low                                     | Low              | Low                  | Low               | Low             | Low        |
| 12) Number of participants did not complete the intervention in each group?                 | NA                                      | NA               | NA                   | NA                | NA              | NA         |
| 13) The groups were comparable for intervention completion.                                 | NA                                      | NA               | NA                   | NA                | NA              | NA         |
| 14) For how many participants were no outcome data available? <sup>‡</sup>                  | PTB 91% (195/214);<br>LBW 90% (192/214) | 14/193<br>(7.3%) | 687/4330;<br>(15.9%) | 97/159<br>(61.0%) | 1.2%<br>(5/409) | 0,0%       |
| 15) Were groups comparable for outcome data?                                                | No                                      | Unclear          | Unclear              | Unclear           | Yes             | Yes        |
| 16) Based on above answers, was attrition bias present?                                     | High                                    | Unclear          | Unclear              | High              | Low             | Low        |
| 17) If so, what is the likely direction of its effect?                                      | Unclear                                 | Unclear          | Unclear              | Unclear           | NA              | NA         |
| 18) The study had an appropriate length of follow-up.                                       | Yes                                     | Yes              | Yes                  | Yes               | Yes             | Yes        |

### Supporting information

| Questions                                                                          | Peretz, 2020 | Perni, 2004 | Rittenschober, 2018 | Schwab, 2015 | Sperling, 1988 | Usui, 2002 |
|------------------------------------------------------------------------------------|--------------|-------------|---------------------|--------------|----------------|------------|
| 19) The study used a precise definition of outcome.                                | Yes          | Yes         | Yes                 | Yes          | Yes            | Yes        |
| 20) A valid, reliable method used to determine the outcome?                        | Yes          | Unclear     | Yes                 | No           | No             | Yes        |
| 21) Investigators were kept 'blind' to participants' exposure to the intervention. | NA           | NA          | NA                  | NA           | NA             | NA         |
| 22) Investigators were kept 'blind' to other important confounding factors.        | NA           | Unclear     | Unclear             | Unclear      | Unclear        | Unclear    |
| 23) Based on above answers, was detection bias present?                            | No           | Unclear     | No                  | Yes          | Unclear        | Unclear    |
| 24) If so, what is the likely direction of its effect?                             | NA           | Unclear     | NA                  | Unclear      | Unclear        | Unclear    |
| <b>25) Overall assessment of internal validity<sup>a</sup></b>                     | -            | +           | +                   | -            | -              | +          |
| <b>26) Overall assessment of external validity<sup>a</sup></b>                     | -            | +           | +                   | -            | -              | -          |

**Abbreviations:** AO, adverse outcomes; High, high risk of bias; Low, low risk of bias; NA, not applicable; NK, not known; STI, sexually transmitted infections; Unclear, unclear of risk of bias.

‡, both groups combined unless stated; <sup>a</sup>++, all or most of checklist criteria fulfilled; + some of checklist criteria fulfilled; - few or no checklist criteria fulfilled.

**Supporting information**

**Table S6.2** Risk of bias assessment, case-control studies (n=25)

| Questions                                                               | Ahmadi,<br>2014 | Cassell,<br>1993 | Chua,<br>1999 | Daskalakis,<br>2009 | Embree,<br>1980 | Farhadifar,<br>2016 | Freitas,<br>2018 |
|-------------------------------------------------------------------------|-----------------|------------------|---------------|---------------------|-----------------|---------------------|------------------|
| 1) Appropriate and clearly focused question.                            | WC              | WC               | WC            | WC                  | AA              | WC                  | AA               |
| 2) The cases and controls are taken from comparable populations.        | AA              | WC               | WC            | AA                  | PA              | AA                  | PA               |
| 3) The same exclusion criteria are used for both cases and controls.    | WC              | NA               | PA            | WC                  | NAd             | AA                  | NAd              |
| 4) What was the participation rate (%) for each group (cases)?          | Unclear         | 87.9 (29/33)     | Unclear       | Unclear             | 100%<br>(n=446) | Unclear             | 100% (n=46)      |
| 5) What was the participation rate (%) for each group (controls)?       | Unclear         | 100 (28/28)      | Unclear       | Unclear             | 100%<br>(n=108) | Unclear             | 100%<br>(n=170)  |
| 6) Both groups compared to establish their similarities or differences. | NAd             | NAd              | NAd           | NAd                 | NAd             | NAd                 | AA               |
| 7) Cases are clearly defined and differentiated from controls.          | WC              | AA               | AA            | WC                  | AA              | WC                  | AA               |

**Supporting information**For peer review only - <http://bmjopen.bmj.com/site/about/guidelines.xhtml>

| Questions                                                                                       | Ahmadi,<br>2014 | Cassell,<br>1993 | Chua,<br>1999 | Daskalakis,<br>2009 | Embree,<br>1980 | Farhadifar,<br>2016 | Freitas,<br>2018 |
|-------------------------------------------------------------------------------------------------|-----------------|------------------|---------------|---------------------|-----------------|---------------------|------------------|
| 8) It is clearly established that controls are not cases.                                       | WC              | AA               | AA            | WC                  | AA              | WC                  | AA               |
| 9) Measures taken to prevent knowledge of primary exposure from influencing case ascertainment. | NA              | NA               | NA            | NA                  | NA              | NA                  | NA               |
| 10) Exposure status is measured in a standard, valid and reliable way.                          | WC              | AA               | AA            | WC                  | AA              | AA                  | WC               |
| 11) Main potential confounders are accounted for in design/analysis                             | AA              | PA               | NR            | AA                  | PA              | AA                  | PA               |
| 12) Confidence intervals provided?                                                              | No              | No               | No            | No                  | No              | Yes                 | No               |
| <b>13) Study results internally valid<sup>a</sup></b>                                           | +               | +                | +             | +                   | -               | +                   | +                |
| <b>14) Study results externally valid<sup>a</sup></b>                                           | +               | -                | +             | +                   | -               | +                   | -                |

**Abbreviations:** AA, adequately addressed; NAd, not addressed; NA, not applicable; PA, poorly addressed; WC, well covered; Unclear, does not have data on how many were excluded or declined to participate but only present numbers

<sup>a</sup>++, all or most of checklist criteria fulfilled; + some of checklist criteria fulfilled; - few or no checklist criteria fulfilled.

**Supporting information**

**Table S6.2** Risk of bias assessment, case-control studies (n=25) (continued)

| Questions                                                                                       | González<br>Bosquet,<br>2006 | Harada,<br>2008 | Hillier,<br>1988  | Holst,<br>1994   | Jalava,<br>2002 | Jones,<br>2009 |
|-------------------------------------------------------------------------------------------------|------------------------------|-----------------|-------------------|------------------|-----------------|----------------|
| 1) Appropriate and clearly focused question.                                                    | WC                           | WC              | WC                | WC               | NR              | WC             |
| 2) The cases and controls are taken from comparable populations.                                | AA                           | AA              | AA                | PA               | AA              | PA             |
| 3) The same exclusion criteria are used for both cases and controls.                            | AA                           | AA              | PA                | AA               | PA              | NAd            |
| 4) What was the participation rate for each group (cases)? %                                    | Unclear                      | Unclear         | 99/107 (92.5%)    | 40.8<br>(49/120) | 100<br>(n=50)   | Unclear        |
| 5) What was the participation rate for each group (controls)? %                                 | Unclear                      | Unclear         | 68/140<br>(48.6%) | 100 (38/38)      | 72 (72/100)     | Unclear        |
| 6) Both groups compared to establish their similarities or differences.                         | NAd                          | NAd             | NAd               | NAd              | NAd             | NAd            |
| 7) Cases are clearly defined and differentiated from controls.                                  | WC                           | AA              | WC                | WC               | WC              | AA             |
| 8) It is clearly established that controls are not cases.                                       | WC                           | AA              | WC                | WC               | AA              | AA             |
| 9) Measures taken to prevent knowledge of primary exposure from influencing case ascertainment. | NA                           | NA              | NA                | NA               | NA              | NA             |

**Supporting information**

1  
2  
3  
4  
5  
6  
7  
8  
9  
10  
11  
12  
13  
14  
15  
16  
17  
18  
19  
20  
21  
22  
23  
24  
25  
26  
27  
28  
29  
30  
31  
32  
33  
34  
35  
36  
37  
38  
39  
40  
41  
42  
43  
44  
45  
46

| Questions                                                               | González<br>Bosquet,<br>2006 | Harada,<br>2008 | Hillier,<br>1988 | Holst,<br>1994 | Jalava,<br>2002 | Jones,<br>2009 |
|-------------------------------------------------------------------------|------------------------------|-----------------|------------------|----------------|-----------------|----------------|
| 10) Exposure status is measured in a standard, valid, and reliable way. | AA                           | WC              | AA               | AA             | WC              | WC             |
| 11) Main potential confounders are accounted for in design/analysis     | PA                           | PA              | WC               | AA             | NAd             | NAd            |
| 12) Confidence intervals provided?                                      | No                           | Yes             | Yes              | No             | No              | No             |
| <b>13) Study results internally valid<sup>a</sup></b>                   | +                            | +               | +                | ++             | +               | -              |
| <b>14) Study results externally valid<sup>a</sup></b>                   | +                            | +               | +                | +              | +               | -              |

**Abbreviations:** AA, adequately addressed; NAd, not addressed; NA, not applicable; PA, poorly addressed; WC, well covered; Unclear, does not have data on how many were excluded or declined to participate but only present numbers.

<sup>a</sup> ++, all or most of checklist criteria fulfilled; + some of checklist criteria fulfilled; - few or no checklist criteria fulfilled.



**Table S6.2** Risk of bias assessment, case-control studies (n=25) (continued)

| Questions                                                                                       | Kacarovsky,<br>2009 | Kafetzis,<br>2004 | Kumar,<br>2006 | McDonald,<br>1992 | Matsunari,<br>2005 | Montenegro,<br>2019 |
|-------------------------------------------------------------------------------------------------|---------------------|-------------------|----------------|-------------------|--------------------|---------------------|
| 1) Appropriate and clearly focused question.                                                    | WC                  | WC                | AA             | AA                | WC                 | WC                  |
| 2) The cases and controls are taken from comparable populations.                                | PA                  | WC                | PA             | AA                | WC                 | AA                  |
| 3) The same exclusion criteria are used for both cases and controls.                            | PA                  | NR                | NAd            | PA                | WC                 | AA                  |
| 4) What was the participation rate for each group (cases)?                                      | Unclear             | Unclear           | 100% (n=60)    | Unclear           | 57.5 (23/40)       | 84 (100%)           |
| 5) What was the participation rate for each group (controls)?                                   | Unclear             | Unclear           | 100% (n=60)    | Unclear           | 60.8 (59/97)       | 127<br>(1000%)      |
| 6) Both groups compared to establish their similarities or differences.                         | NAd                 | NAd               | NAd            | AA                | NA                 | NA                  |
| 7) Cases are clearly defined and differentiated from controls.                                  | WC                  | WC                | NAd            | AA                | AA                 | AA                  |
| 8) It is clearly established that controls are not cases.                                       | PA                  | WC                | AA             | AA                | AA                 | AA                  |
| 9) Measures taken to prevent knowledge of primary exposure from influencing case ascertainment. | NA                  | NA                | NA             | NA                | NA                 | NA                  |

**Supporting information**

| Questions                                                               | Kacerovsky,<br>2009 | Kafetzis,<br>2004 | Kumar,<br>2006 | McDonald,<br>1992 | Matsunari,<br>2005 | Montenegro,<br>2019 |
|-------------------------------------------------------------------------|---------------------|-------------------|----------------|-------------------|--------------------|---------------------|
| 10) Exposure status is measured in a standard, valid, and reliable way. | AA                  | WC                | PA             | PA                | WC                 | WC                  |
| 11) Main potential confounders are accounted for in design/analysis     | PA                  | NAd               | NAd            | AA                | PA                 | PA                  |
| 12) Confidence intervals provided?                                      | No                  | No                | No             | Yes               | No                 | No                  |
| <b>13) Study results internally valid<sup>a</sup></b>                   | -                   | +                 | -              | +                 | +                  | +                   |
| <b>14) Study results externally valid<sup>a</sup></b>                   | -                   | +                 | -              | +                 | +                  | +                   |

**Abbreviations:** AA, adequately addressed; NAd, not addressed; NA, not applicable; PA, poorly addressed; WC, well covered; Unclear, does not have data on how many were excluded or declined to participate but only present numbers

<sup>a</sup>++, all or most of checklist criteria fulfilled; + some of checklist criteria fulfilled; - few or no checklist criteria fulfilled.

**Table S6.2** Risk of bias assessment, case-control studies (n=25) (continued)

| Questions                                                                                       | Munday,<br>1984 | Oliveira,<br>2020 | Payne,<br>2014 | Povlsen,<br>2001 | Toth,<br>1992 | Yoon,<br>2001 |
|-------------------------------------------------------------------------------------------------|-----------------|-------------------|----------------|------------------|---------------|---------------|
| 1) Appropriate and clearly focused question.                                                    | WC              | AA                | WC             | WC               | WC            | WC            |
| 2) The cases and controls are taken from comparable populations.                                | AA              | PA                | WC             | WC               | AA            | AA            |
| 3) The same exclusion criteria are used for both cases and controls.                            | NAd             | PA                | AA             | NAd              | PA            | PA            |
| 4) What was the participation rate for each group (cases)?                                      | Unclear         | 100%              | 100%           | Unclear          | Unclear       | Unclear       |
| 5) What was the participation rate for each group (controls)?                                   | Unclear         | 100%              | 100%           | Unclear          | Unclear       | Unclear       |
| 6) Both groups compared to establish their similarities or differences.                         | NA              | AA                | NAd            | NA               | NA            | NA            |
| 7) Cases are clearly defined and differentiated from controls.                                  | PA              | WC                | AA             | AA               | PA            | WC            |
| 8) It is clearly established that controls are not cases.                                       | PA              | WC                | PA             | PA               | PA            | WC            |
| 9) Measures taken to prevent knowledge of primary exposure from influencing case ascertainment. | NA              | NA                | NAd            | NA               | NA            | NA            |
| 10) Exposure status is measured in a standard, valid, and reliable way.                         | AA              | AA                | AA             | AA               | PA            | WC            |
| 11) Main potential confounders are accounted for in design/analysis                             | PA              | AA                | NAd            | NAd              | PA            | AA            |
| 12) Confidence intervals provided?                                                              | No              | Yes               | Yes            | Yes              | No            | No            |

**Supporting information**

1  
2  
3  
4  
5  
6  
7  
8  
9  
10  
11  
12  
13  
14  
15  
16  
17  
18  
19  
20  
21  
22  
23  
24  
25  
26  
27  
28  
29  
30  
31  
32  
33  
34  
35  
36  
37  
38  
39  
40  
41  
42  
43  
44  
45  
46

| Questions                                       | Munday,<br>1984 | Oliveira,<br>2020 | Payne,<br>2014 | Povlsen,<br>2001 | Toth,<br>1992 | Yoon,<br>2001 |
|-------------------------------------------------|-----------------|-------------------|----------------|------------------|---------------|---------------|
| 13) Study results internally valid <sup>a</sup> | +               | +                 | +              | +                | -             | +             |
| 14) Study results externally valid <sup>a</sup> | -               | +                 | +              | +                | -             | +             |

**Abbreviations:** AA, adequately addressed; NAd, not addressed; NA, not applicable; PA, poorly addressed; Unclear, does not have data on how many were excluded or declined to participate but only present numbers; WC, well covered.

<sup>a</sup>++, all or most of checklist criteria fulfilled; + some of checklist criteria fulfilled; - few or no checklist criteria fulfilled.

**Table S6.3** Risk of bias assessment, cross-sectional studies (n=6)

| Questions                                                                           | Abele-Horn,<br>2000 | Grattard,<br>1995 | Kundsin,<br>1984 | McCormack,<br>1975 | Nasution,<br>2007 | Sweeney,<br>2016 |
|-------------------------------------------------------------------------------------|---------------------|-------------------|------------------|--------------------|-------------------|------------------|
| 1) Is the source population, source area well described?                            | +                   | +                 | NR               | -                  | NR                | +                |
| 2) Is the eligible population or area representative of the source population?      | -                   | +                 | NR               | -                  | NR                | -                |
| 3) Do the selected participants or areas represent the eligible population or area? | -                   | NR                | -                | -                  | NR                | -                |
| 4) Selection of exposure (and comparison) group. How was selection bias minimised?  | NR                  | NR                | NR               | NR                 | NR                | NR               |
| 5) Was the selection of explanatory variables based on a sound theoretical basis?   | +                   | -                 | +                | -                  | +                 | +                |
| 6) Was the contamination acceptably low?                                            | NA                  | NA                | NA               | NA                 | NR                | NA               |
| 7) How well were likely confounding factors identified and controlled?              | +                   | NR                | NR               | NR                 | NR                | -                |
| 8) Outcome measures and procedures reliable?                                        | +                   | -                 | +                | -                  | +                 | -                |
| 9) Were the outcome measurements complete?                                          | +                   | +                 | +                | +                  | ++                | +                |

**Supporting information**For peer review only - <http://bmjopen.bmj.com/site/about/guidelines.xhtml>

1  
2  
3  
4  
5  
6  
7  
8  
9  
10  
11  
12  
13  
14  
15  
16  
17  
18  
19  
20  
21  
22  
23  
24  
25  
26  
27  
28  
29  
30  
31  
32  
33  
34  
35  
36  
37  
38  
39  
40  
41  
42  
43  
44  
45  
46

|                                                                                     |    |    |    |    |    |    |
|-------------------------------------------------------------------------------------|----|----|----|----|----|----|
| 10) Were all the important outcomes assessed?                                       | -  | +  | +  | +  | +  | ++ |
| 11) Was there a similar follow-up time in exposure and comparison groups?           | +  | -  | ++ | +  | ++ | +  |
| 12) Was follow-up time meaningful?                                                  | +  | +  | ++ | +  | ++ | +  |
| 13) Was the study sufficiently powered to detect an exposure effect (if one exists) | NA | NA | NA | NA | NR | NA |
| 14) Were multiple explanatory variables considered in analyses?                     | NR | NR | NR | NR | NR | NR |
| 15) Were the analytical methods appropriate?                                        | +  | -  | -  | +  | -  | +  |
| 16) Was the precision of association given or calculable?                           | +  | +  | +  | +  | +  | +  |
| <b>17) Overall assessment of internal validity<sup>a</sup></b>                      | -  | -  | -  | +  | -  | +  |
| <b>18) Overall assessment of external validity<sup>a</sup></b>                      | -  | +  | +  | -  | -  | -  |

**Abbreviations:** ++, yes; +, mostly; -, no; NR, not reported; NA, not applicable.

<sup>a</sup> ++, all or most of checklist criteria fulfilled; + some of checklist criteria fulfilled; - few or no checklist criteria fulfilled.

**Table S7** Summary of assessment of funnel plot asymmetry, for outcomes reported in 10 or more studies

| Organism              | Outcome | Egger test (95% CI)* | P value |
|-----------------------|---------|----------------------|---------|
| <i>M. hominis</i>     | PTB     | 0.56 (-0.08, 1.2)    | 0.09    |
|                       | PROM    | 0.05 (-1.07, 1.17)   | 0.92    |
|                       | SA      | -0.28 (-3.20, 2.64)  | 0.83    |
| <i>U. urealyticum</i> | PTB     | 0.89 (-0.15, 1.93)   | 0.09    |
|                       | PROM    | 1.2 (-1.7, 4.09)     | 0.37    |
| <i>U. parvum</i>      | PTB     | 0.53 (-1.27, 2.34)   | 0.52    |

**Abbreviations:** CI, confidence interval; PND: perinatal death; PTB: preterm birth; PROM: premature rupture of membrane; S: spontaneous abortion

\* Egger test for small-study effects

## Research checklists

## A. 1 Preferred reporting items for systematic review and meta-analysis (PRISMA)

| Section and Topic    | Item # | Checklist item                                                                                                                                                                                            | Location where item is reported |
|----------------------|--------|-----------------------------------------------------------------------------------------------------------------------------------------------------------------------------------------------------------|---------------------------------|
| TITLE                |        |                                                                                                                                                                                                           |                                 |
| Title                | 1      | Identify the report as a systematic review.                                                                                                                                                               | 1                               |
| ABSTRACT             |        |                                                                                                                                                                                                           |                                 |
| Abstract             | 2      | See the PRISMA 2020 for Abstracts checklist.                                                                                                                                                              | 4-5                             |
| INTRODUCTION         |        |                                                                                                                                                                                                           |                                 |
| Rationale            | 3      | Describe the rationale for the review in the context of existing knowledge.                                                                                                                               | 6                               |
| Objectives           | 4      | Provide an explicit statement of the objective(s) or question(s) the review addresses.                                                                                                                    | 7                               |
| METHODS              |        |                                                                                                                                                                                                           |                                 |
| Eligibility criteria | 5      | Specify the inclusion and exclusion criteria for the review and how studies were grouped for the syntheses.                                                                                               | 7                               |
| Information sources  | 6      | Specify all databases, registers, websites, organisations, reference lists and other sources searched or consulted to identify studies. Specify the date when each source was last searched or consulted. | 8                               |
| Search strategy      | 7      | Present the full search strategies for all databases, registers and websites, including any filters and limits used.                                                                                      | Appendix S1                     |
| Selection process    | 8      | Specify the methods used to decide whether a study met the inclusion criteria of the review, including how many reviewers screened each record and each report                                            | 8                               |



## Research checklists

| Section and Topic             | Item # | Checklist item                                                                                                                                                                                                                                                                                       | Location where item is reported |
|-------------------------------|--------|------------------------------------------------------------------------------------------------------------------------------------------------------------------------------------------------------------------------------------------------------------------------------------------------------|---------------------------------|
|                               |        | retrieved, whether they worked independently, and if applicable, details of automation tools used in the process.                                                                                                                                                                                    |                                 |
| Data collection process       | 9      | Specify the methods used to collect data from reports, including how many reviewers collected data from each report, whether they worked independently, any processes for obtaining or confirming data from study investigators, and if applicable, details of automation tools used in the process. | 8-9                             |
| Data items                    | 10a    | List and define all outcomes for which data were sought. Specify whether all results that were compatible with each outcome domain in each study were sought (e.g. for all measures, time points, analyses), and if not, the methods used to decide which results to collect.                        | 6                               |
|                               | 10b    | List and define all other variables for which data were sought (e.g. participant and intervention characteristics, funding sources). Describe any assumptions made about any missing or unclear information.                                                                                         | 8-9                             |
| Study risk of bias assessment | 11     | Specify the methods used to assess risk of bias in the included studies, including details of the tool(s) used, how many reviewers assessed each study and whether they worked independently, and if applicable, details of automation tools used in the process.                                    | 9                               |
| Effect measures               | 12     | Specify for each outcome the effect measure(s) (e.g. risk ratio, mean difference) used in the synthesis or presentation of results.                                                                                                                                                                  | 9                               |
| Synthesis methods             | 13a    | Describe the processes used to decide which studies were eligible for each synthesis (e.g. tabulating the study intervention characteristics and comparing against the planned groups for each synthesis (item #5)).                                                                                 | 9                               |

Research checklists

| Section and Topic         | Item # | Checklist item                                                                                                                                                                                                                                              | Location where item is reported |
|---------------------------|--------|-------------------------------------------------------------------------------------------------------------------------------------------------------------------------------------------------------------------------------------------------------------|---------------------------------|
|                           | 13b    | Describe any methods required to prepare the data for presentation or synthesis, such as handling of missing summary statistics, or data conversions.                                                                                                       | 9                               |
|                           | 13c    | Describe any methods used to tabulate or visually display results of individual studies and syntheses.                                                                                                                                                      | 9                               |
|                           | 13d    | Describe any methods used to synthesize results and provide a rationale for the choice(s). If meta-analysis was performed, describe the model(s), method(s) to identify the presence and extent of statistical heterogeneity, and software package(s) used. | 9                               |
|                           | 13e    | Describe any methods used to explore possible causes of heterogeneity among study results (e.g. subgroup analysis, meta-regression).                                                                                                                        | 9                               |
|                           | 13f    | Describe any sensitivity analyses conducted to assess robustness of the synthesized results.                                                                                                                                                                | None                            |
| Reporting bias assessment | 14     | Describe any methods used to assess risk of bias due to missing results in a synthesis (arising from reporting biases).                                                                                                                                     | 9                               |
| Certainty assessment      | 15     | Describe any methods used to assess certainty (or confidence) in the body of evidence for an outcome.                                                                                                                                                       | 9                               |
| <b>RESULTS</b>            |        |                                                                                                                                                                                                                                                             |                                 |
| Study selection           | 16a    | Describe the results of the search and selection process, from the number of records identified in the search to the number of studies included in the review, ideally using a flow diagram.                                                                | Figure S1                       |

## Research checklists

| Section and Topic             | Item # | Checklist item                                                                                                                                                                                                                                                                       | Location where item is reported                      |
|-------------------------------|--------|--------------------------------------------------------------------------------------------------------------------------------------------------------------------------------------------------------------------------------------------------------------------------------------|------------------------------------------------------|
|                               | 16b    | Cite studies that might appear to meet the inclusion criteria, but which were excluded, and explain why they were excluded.                                                                                                                                                          | Figure S1                                            |
| Study characteristics         | 17     | Cite each included study and present its characteristics.                                                                                                                                                                                                                            | Table S1, reference list                             |
| Risk of bias in studies       | 18     | Present assessments of risk of bias for each included study.                                                                                                                                                                                                                         | 11, supporting information                           |
| Results of individual studies | 19     | For all outcomes, present, for each study: (a) summary statistics for each group (where appropriate) and (b) an effect estimate and its precision (e.g. confidence/credible interval), ideally using structured tables or plots.                                                     | Table 1, Fig 1, Fig 2, Fig 3, supporting information |
| Results of syntheses          | 20a    | For each synthesis, briefly summarise the characteristics and risk of bias among contributing studies.                                                                                                                                                                               | 11, supporting information                           |
|                               | 20b    | Present results of all statistical syntheses conducted. If meta-analysis was done, present for each the summary estimate and its precision (e.g. confidence/credible interval) and measures of statistical heterogeneity. If comparing groups, describe the direction of the effect. | 11-14                                                |
|                               | 20c    | Present results of all investigations of possible causes of heterogeneity among study results.                                                                                                                                                                                       | Supporting information                               |
|                               | 20d    | Present results of all sensitivity analyses conducted to assess the robustness of the synthesized results.                                                                                                                                                                           | None                                                 |
| Reporting biases              | 21     | Present assessments of risk of bias due to missing results (arising from reporting biases) for each synthesis assessed.                                                                                                                                                              | None                                                 |

## Research checklists

| Section and Topic         | Item # | Checklist item                                                                                                                                 | Location where item is reported             |
|---------------------------|--------|------------------------------------------------------------------------------------------------------------------------------------------------|---------------------------------------------|
| Certainty of evidence     | 22     | Present assessments of certainty (or confidence) in the body of evidence for each outcome assessed.                                            | Fig 1, Fig 2, Fig 3, supporting information |
| <b>DISCUSSION</b>         |        |                                                                                                                                                |                                             |
| Discussion                | 23a    | Provide a general interpretation of the results in the context of other evidence.                                                              | 15                                          |
|                           | 23b    | Discuss any limitations of the evidence included in the review.                                                                                | 16                                          |
|                           | 23c    | Discuss any limitations of the review processes used.                                                                                          | 15                                          |
|                           | 23d    | Discuss implications of the results for practice, policy, and future research.                                                                 | 17-18                                       |
| <b>OTHER INFORMATION</b>  |        |                                                                                                                                                |                                             |
| Registration and protocol | 24a    | Provide registration information for the review, including register name and registration number, or state that the review was not registered. | 1                                           |
|                           | 24b    | Indicate where the review protocol can be accessed, or state that a protocol was not prepared.                                                 | 1                                           |
|                           | 24c    | Describe and explain any amendments to information provided at registration or in the protocol.                                                | None                                        |
| Support                   | 25     | Describe sources of financial or non-financial support for the review, and the role of the funders or sponsors in the review.                  | 18                                          |
| Competing interests       | 26     | Declare any competing interests of review authors.                                                                                             | 19                                          |

## Research checklists

| Section and Topic                              | Item # | Checklist item                                                                                                                                                                                                                             | Location where item is reported |
|------------------------------------------------|--------|--------------------------------------------------------------------------------------------------------------------------------------------------------------------------------------------------------------------------------------------|---------------------------------|
| Availability of data, code and other materials | 27     | Report which of the following are publicly available and where they can be found: template data collection forms; data extracted from included studies; data used for all analyses; analytic code; any other materials used in the review. | Supporting information          |

For peer review only

Research checklists

1  
2  
3  
4  
5  
6  
7  
8  
9  
10  
11  
12  
13  
14  
15  
16  
17  
18  
19  
20  
21  
22  
23  
24  
25  
26  
27  
28  
29  
30  
31  
32  
33  
34  
35  
36  
37  
38  
39  
40  
41  
42  
43  
44  
45  
46

A.2 Preferred reporting checklist of Meta-analysis (MOOSE)<sup>1</sup>

| Checklist item                                                                          | Page #                                          |
|-----------------------------------------------------------------------------------------|-------------------------------------------------|
| <b>Reporting of background should include</b>                                           |                                                 |
| Problem definition                                                                      | 6                                               |
| Hypothesis statement                                                                    | No                                              |
| Description of study outcome(s)                                                         | 6                                               |
| Type of exposure or intervention used                                                   | 6-7                                             |
| Type of study designs used                                                              | 7                                               |
| Study population                                                                        | 7                                               |
| <b>Reporting of search strategy should include</b>                                      |                                                 |
| Qualifications of searchers (eg. Librarians and investigators)                          | 1                                               |
| Search strategy, including time period included in the synthesis and keywords           | 7-8, Appendix S1                                |
| Effort to include all available studies, including contact with authors                 | No                                              |
| Databases and registries searched                                                       | 8                                               |
| Search software used, name and version, including special features used (eg, explosion) | No                                              |
| Use of hand searching (eg, reference lists of obtained articles)                        | 8                                               |
| List of citations located and those excluded, including justification                   | Fig 1,<br>Table S1, excluded studies not listed |

## Research checklists

|                                                                                                                                                                                                                                                                           |                                                      |
|---------------------------------------------------------------------------------------------------------------------------------------------------------------------------------------------------------------------------------------------------------------------------|------------------------------------------------------|
| Method of addressing articles published in languages other than English                                                                                                                                                                                                   | 8                                                    |
| Method of handling abstracts and unpublished studies                                                                                                                                                                                                                      | Excluded                                             |
| Description of any contact with authors                                                                                                                                                                                                                                   | We did not contact authors                           |
| <b>Reporting of methods should include</b>                                                                                                                                                                                                                                |                                                      |
| Description of relevance or appropriateness of studies assembled for assessing the hypothesis to be tested                                                                                                                                                                | 7-8                                                  |
| Rationale for the selection and coding of data (eg, multiple raters, blinding and interrater reliability)                                                                                                                                                                 | 7-8                                                  |
| Assessment of confounding (eg, comparability of cases and controls in studies where appropriate)                                                                                                                                                                          | 7                                                    |
| Assessment of study quality, including blinding of quality assessors; stratification or regression on possible predictors of study results                                                                                                                                | 9                                                    |
| Assessment of heterogeneity                                                                                                                                                                                                                                               | 9                                                    |
| Description of statistical methods (eg, complete description of fixed or random effects models, justification of whether the chosen models account for predictors of study results, dose-response models, cumulative meta-analysis) in sufficient detail to be replicated | 9                                                    |
| Provision of appropriate tables and graphs                                                                                                                                                                                                                                | Main text and supporting information                 |
| <b>Reporting of results should include</b>                                                                                                                                                                                                                                |                                                      |
| Graphic summarizing individual study estimates and overall estimate                                                                                                                                                                                                       | Main text and forest plots in supporting information |

Research checklists

1  
2  
3  
4  
5  
6  
7  
8  
9  
10  
11  
12  
13  
14  
15  
16  
17  
18  
19  
20  
21  
22  
23  
24  
25  
26  
27  
28  
29  
30  
31  
32  
33  
34  
35  
36  
37  
38  
39  
40  
41  
42  
43  
44  
45  
46

|                                                                                                                       |                                                      |
|-----------------------------------------------------------------------------------------------------------------------|------------------------------------------------------|
| Table giving descriptive information for each study included                                                          | Table S1                                             |
| Results of sensitivity testing (eg, subgroup analysis)                                                                | None                                                 |
| Indication of statistical uncertainty of findings                                                                     | Main text and forest plots in supporting information |
| <b>Reporting of discussion should include</b>                                                                         |                                                      |
| Quantitative assessment of bias (eg, publication bias)                                                                | 15-16                                                |
| Justification of exclusion (eg. Exclusion of non-English-language citations)                                          | No (provided pg 8 on methods)                        |
| Assessment of Quality of included studies                                                                             | 15-17                                                |
| <b>Reporting of conclusions should include</b>                                                                        |                                                      |
| Consideration of alternative explanations of observations                                                             | 17-18                                                |
| Generalization of conclusions (ie, appropriate for the data presented and within the domain of the literature review) | 17-18                                                |
| Guidelines for future research                                                                                        | 17-18                                                |
| Disclosure of funding source                                                                                          | 18                                                   |

<sup>1</sup> Stroup DF, Berlin JA, Morton SC, Olkin I, Williamson GD, Rennie D, et al. Meta-analysis of observational studies in epidemiology: a proposal for reporting. **Jama**. 2000 Apr 19;283(15):2008-12.
