# Supplementary material for: Adverse pregnancy and birth outcomes associated with Mycoplasma hominis, Ureaplasma urealyticum and Ureaplasma parvum: a systematic review and meta-analysis
Source: PubMed Central journal article supplement (PMC9422885; doi:10.1136/bmjopen-2022-062990), 2022-08-26
Supplement: bmjopen-2022-062990supp001.pdf [file bmjopen-2022-062990supp001.pdf]

**ONLINE SUPPLEMENTAL FILE****Adverse pregnancy and birth outcomes associated with *M. hominis*, *U. urealyticum* and *U. parvum*: A systematic review and meta-analysis.**

Marinjo Emely Jonduo,<sup>1</sup> Lisa Michelle Vallely,<sup>1,2</sup> Handan Wand,<sup>3</sup> Emma Louise Sweeney,<sup>4</sup> Dianne Egli-Gany,<sup>5</sup> John Martin Kaldor,<sup>1</sup> Andrew John Vallely<sup>1,2</sup> and Nicola Low,<sup>5</sup>

<sup>1</sup> Public Health Interventions Research Program, The Kirby Institute, University of New South Wales, Sydney, NSW 2052, Australia.

<sup>2</sup> Sexual and Reproductive Health Unit, Papua New Guinea Institute of Medical Research, Goroka, Eastern Highlands Province 441, Papua New Guinea.

<sup>3</sup> Biostatistics and Databases program, The Kirby Institute, University of New South Wales, Sydney, New South Wales, Australia.

<sup>4</sup> The University of Queensland Center for Clinical Research, Brisbane, Queensland 4029, Australia.

<sup>5</sup> Institute of Social and Preventive Medicine, University of Bern, CH-3012 Bern, Switzerland.

## ONLINE SUPPLEMENTAL FILE

## Table of contents

|                                                                                                                                             |    |
|---------------------------------------------------------------------------------------------------------------------------------------------|----|
| A.1 Preferred reporting items for systematic review and meta-analysis (PRISMA).....                                                         | 3  |
| A.2 Search strategy.....                                                                                                                    | 6  |
| Figure S1 Flow chart of identified and selected studies for inclusion.....                                                                  | 7  |
| Table S1 Summary of characteristics of included studies, alphabetical order.....                                                            | 8  |
| Figure S3.1 Forest plot of association between <i>M. hominis</i> and premature rupture of membrane, random effects model.....               | 17 |
| Figure S3.2 Forest plot of association between <i>M. hominis</i> and low birthweight, random effects model.....                             | 18 |
| Figure S3.3 Forest plot of association between <i>M. hominis</i> and perinatal death random effects model. ....                             | 19 |
| Figure S3.4 Forest plot of association between <i>M. hominis</i> and spontaneous abortion random effects model... 20                        |    |
| Figure S3.5 Forest plot of association between <i>U. urealyticum</i> and premature rupture of membrane, random effects model.....           | 21 |
| Figure S3.6 Forest plot of association between <i>U. urealyticum</i> and spontaneous abortion, random effects model.....                    | 21 |
| Figure S3.7 Forest plot of association between <i>U. parvum</i> and premature rupture of membrane, random effects model.....                | 22 |
| Figure S3.8 Forest plot of association between <i>U. parvum</i> and spontaneous abortion random effects model. ...                          | 22 |
| Table S2.1 Descriptive tables: cohort studies (n=26), in alphabetical order.....                                                            | 23 |
| Table S2.2 Descriptive tables: case-control studies (n=22), in alphabetical order.....                                                      | 26 |
| Table S2.3 Descriptive tables: cross-sectional studies (n=5), in alphabetical order.....                                                    | 28 |
| Table S3.1 Summary description of studies reporting <i>M. hominis</i> (n=42) in alphabetical order, by country-level income status.....     | 29 |
| Table S3.2 Summary description of studies reporting <i>U. urealyticum</i> (n=18) in alphabetical order, by country-level income status..... | 33 |
| Table S3.3 Summary description of studies reporting <i>U. parvum</i> (n=14) in alphabetical order.....                                      | 36 |
| Table S4.1 Study setting and socio-demographics, cohort studies (n=26), in alphabetical order.....                                          | 38 |
| Table S4.2 Study setting and socio-demographics, case-control studies (n=22), in alphabetical order.....                                    | 41 |
| Table S4.3 Study setting and socio-demographics, cross-sectional studies (n=5), in alphabetical order.....                                  | 43 |
| Table S5 Studies that reported on bacterial vaginosis and associations with adverse birth outcomes (n=10), in alphabetical order.....       | 44 |
| Table S6.1 Risk of bias assessment, cohort studies (n=26).....                                                                              | 47 |
| Table S6.2 Risk of bias assessment, case-control studies (n=22).....                                                                        | 53 |
| Table S6.3 Risk of bias assessment, cross-sectional studies (n=5).....                                                                      | 56 |
| Table S7 Summary of assessment of regression analysis for small study effects, for outcomes reported in 10 or more studies.....             | 57 |

**ONLINE SUPPLEMENTAL FILE****A.1 Preferred reporting items for systematic review and meta-analysis (PRISMA)**

| Section and Topic             | Item # | Checklist item                                                                                                                                                                                                                                                                                       | Location where item is reported in published pdf |
|-------------------------------|--------|------------------------------------------------------------------------------------------------------------------------------------------------------------------------------------------------------------------------------------------------------------------------------------------------------|--------------------------------------------------|
| <b>TITLE</b>                  |        |                                                                                                                                                                                                                                                                                                      |                                                  |
| Title                         | 1      | Identify the report as a systematic review.                                                                                                                                                                                                                                                          | Page 1                                           |
| <b>ABSTRACT</b>               |        |                                                                                                                                                                                                                                                                                                      |                                                  |
| Abstract                      | 2      | See the PRISMA 2020 for Abstracts checklist.                                                                                                                                                                                                                                                         | Page 1                                           |
| <b>INTRODUCTION</b>           |        |                                                                                                                                                                                                                                                                                                      |                                                  |
| Rationale                     | 3      | Describe the rationale for the review in the context of existing knowledge.                                                                                                                                                                                                                          | Page 1                                           |
| Objectives                    | 4      | Provide an explicit statement of the objective(s) or question(s) the review addresses.                                                                                                                                                                                                               | Page 2                                           |
| <b>METHODS</b>                |        |                                                                                                                                                                                                                                                                                                      |                                                  |
| Eligibility criteria          | 5      | Specify the inclusion and exclusion criteria for the review and how studies were grouped for the syntheses.                                                                                                                                                                                          | Page 2                                           |
| Information sources           | 6      | Specify all databases, registers, websites, organisations, reference lists and other sources searched or consulted to identify studies. Specify the date when each source was last searched or consulted.                                                                                            | Page 2                                           |
| Search strategy               | 7      | Present the full search strategies for all databases, registers, and websites, including any filters and limits used.                                                                                                                                                                                | Appendix A.2                                     |
| Selection process             | 8      | Specify the methods used to decide whether a study met the inclusion criteria of the review, including how many reviewers screened each record and each report retrieved, whether they worked independently, and if applicable, details of automation tools used in the process.                     | Page 2                                           |
| Data collection process       | 9      | Specify the methods used to collect data from reports, including how many reviewers collected data from each report, whether they worked independently, any processes for obtaining or confirming data from study investigators, and if applicable, details of automation tools used in the process. | Page 2                                           |
| Data items                    | 10a    | List and define all outcomes for which data were sought. Specify whether all results that were compatible with each outcome domain in each study were sought (e.g., for all measures, time points, analyses), and if not, the methods used to decide which results to collect.                       | Page 2                                           |
|                               | 10b    | List and define all other variables for which data were sought (e.g., participant and intervention characteristics, funding sources). Describe any assumptions made about any missing or unclear information.                                                                                        | Page 2                                           |
| Study risk of bias assessment | 11     | Specify the methods used to assess risk of bias in the included studies, including details of the tool(s) used, how many reviewers assessed each study and whether they worked independently, and if applicable, details of automation tools used in the process.                                    | Page 2                                           |
| Effect measures               | 12     | Specify for each outcome the effect measure(s) (e.g., risk ratio, mean difference) used in the synthesis or presentation of results.                                                                                                                                                                 | Page 2-3                                         |

## ONLINE SUPPLEMENTAL FILE

| Section and Topic             | Item # | Checklist item                                                                                                                                                                                                                                                                        | Location where item is reported in published pdf   |
|-------------------------------|--------|---------------------------------------------------------------------------------------------------------------------------------------------------------------------------------------------------------------------------------------------------------------------------------------|----------------------------------------------------|
| Synthesis methods             | 13a    | Describe the processes used to decide which studies were eligible for each synthesis (e.g., tabulating the study intervention characteristics and comparing against the planned groups for each synthesis (item #5)).                                                                 | c                                                  |
|                               | 13b    | Describe any methods required to prepare the data for presentation or synthesis, such as handling of missing summary statistics, or data conversions.                                                                                                                                 | Page 3                                             |
|                               | 13c    | Describe any methods used to tabulate or visually display results of individual studies and syntheses.                                                                                                                                                                                | Page 3                                             |
|                               | 13d    | Describe any methods used to synthesize results and provide a rationale for the choice(s). If meta-analysis was performed, describe the model(s), method(s) to identify the presence and extent of statistical heterogeneity, and software package(s) used.                           | Page 3                                             |
|                               | 13e    | Describe any methods used to explore possible causes of heterogeneity among study results (e.g., subgroup analysis, meta-regression).                                                                                                                                                 | Page 3                                             |
|                               | 13f    | Describe any sensitivity analyses conducted to assess robustness of the synthesized results.                                                                                                                                                                                          | None                                               |
| Reporting bias assessment     | 14     | Describe any methods used to assess risk of bias due to missing results in a synthesis (arising from reporting biases).                                                                                                                                                               | Page 2                                             |
| Certainty assessment          | 15     | Describe any methods used to assess certainty (or confidence) in the body of evidence for an outcome.                                                                                                                                                                                 | None                                               |
| <b>RESULTS</b>                |        |                                                                                                                                                                                                                                                                                       |                                                    |
| Study selection               | 16a    | Describe the results of the search and selection process, from the number of records identified in the search to the number of studies included in the review, ideally using a flow diagram.                                                                                          | Page 3, figure S1                                  |
|                               | 16b    | Cite studies that might appear to meet the inclusion criteria, but which were excluded, and explain why they were excluded.                                                                                                                                                           | Figure S1                                          |
| Study characteristics         | 17     | Cite each included study and present its characteristics.                                                                                                                                                                                                                             | Page 3, table S1, tables 2.1-2.3, 3.1-3.3, 4.1-4.3 |
| Risk of bias in studies       | 18     | Present assessments of risk of bias for each included study.                                                                                                                                                                                                                          | Page 3, tables 3.1-3.3, 6.1-6.3                    |
| Results of individual studies | 19     | For all outcomes, present, for each study: (a) summary statistics for each group (where appropriate) and (b) an effect estimates and its precision (e.g., confidence/credible interval), ideally using structured tables or plots.                                                    | Page 3-7, table 2, fig 1-3, figure S3.1-3.8        |
| Results of syntheses          | 20a    | For each synthesis, briefly summarise the characteristics and risk of bias among contributing studies.                                                                                                                                                                                | Page 3                                             |
|                               | 20b    | Present results of all statistical syntheses conducted. If meta-analysis was done, present for each the summary estimate and its precision (e.g., confidence/credible interval) and measures of statistical heterogeneity. If comparing groups, describe the direction of the effect. | Page 3-7, table 2, figure 1-3, figure S3.1-3.8     |
|                               | 20c    | Present results of all investigations of possible causes of heterogeneity among study results.                                                                                                                                                                                        | None                                               |

**ONLINE SUPPLEMENTAL FILE**

| Section and Topic                              | Item # | Checklist item                                                                                                                                                                                                                             | Location where item is reported in published pdf |
|------------------------------------------------|--------|--------------------------------------------------------------------------------------------------------------------------------------------------------------------------------------------------------------------------------------------|--------------------------------------------------|
|                                                | 20d    | Present results of all sensitivity analyses conducted to assess the robustness of the synthesized results.                                                                                                                                 | None                                             |
| Reporting biases                               | 21     | Present assessments of risk of bias due to missing results (arising from reporting biases) for each synthesis assessed.                                                                                                                    | Page 3, table S7                                 |
| Certainty of evidence                          | 22     | Present assessments of certainty (or confidence) in the body of evidence for each outcome assessed.                                                                                                                                        | None                                             |
| <b>DISCUSSION</b>                              |        |                                                                                                                                                                                                                                            |                                                  |
| Discussion                                     | 23a    | Provide a general interpretation of the results in the context of other evidence.                                                                                                                                                          | Page 8-10                                        |
|                                                | 23b    | Discuss any limitations of the evidence included in the review.                                                                                                                                                                            | Page 8                                           |
|                                                | 23c    | Discuss any limitations of the review processes used.                                                                                                                                                                                      | Page 8                                           |
|                                                | 23d    | Discuss implications of the results for practice, policy, and future research.                                                                                                                                                             | Page 9-10                                        |
| <b>OTHER INFORMATION</b>                       |        |                                                                                                                                                                                                                                            |                                                  |
| Registration and protocol                      | 24a    | Provide registration information for the review, including register name and registration number, or state that the review was not registered.                                                                                             | Page 1                                           |
|                                                | 24b    | Indicate where the review protocol can be accessed, or state that a protocol was not prepared.                                                                                                                                             | Page 2, reference 22                             |
|                                                | 24c    | Describe and explain any amendments to information provided at registration or in the protocol.                                                                                                                                            | None                                             |
| Support                                        | 25     | Describe sources of financial or non-financial support for the review, and the role of the funders or sponsors in the review.                                                                                                              | Page 10                                          |
| Competing interests                            | 26     | Declare any competing interests of review authors.                                                                                                                                                                                         | Page 10                                          |
| Availability of data, code and other materials | 27     | Report which of the following are publicly available and where they can be found; template data collection forms; data extracted from included studies; data used for all analyses; analytic code; any other materials used in the review. | Online supplemental file                         |

## ONLINE SUPPLEMENTAL FILE

### A.2 Search strategy

---

|                            |                                                                                                                                                                                                                                                                                                                                                                                                                                                                                                                                                                                                                                                                                                                                                                                                                                                                       |
|----------------------------|-----------------------------------------------------------------------------------------------------------------------------------------------------------------------------------------------------------------------------------------------------------------------------------------------------------------------------------------------------------------------------------------------------------------------------------------------------------------------------------------------------------------------------------------------------------------------------------------------------------------------------------------------------------------------------------------------------------------------------------------------------------------------------------------------------------------------------------------------------------------------|
| 1. Terms for population    | “pregnancy” or “prenatal” or “antenatal”                                                                                                                                                                                                                                                                                                                                                                                                                                                                                                                                                                                                                                                                                                                                                                                                                              |
| 2. Terms for exposure      | “Mycoplasma hominis” or “M. hominis”; “Ureaplasma urealyticum” or “U. urealyticum”; “Ureaplasma parvum” or “U. parvum”                                                                                                                                                                                                                                                                                                                                                                                                                                                                                                                                                                                                                                                                                                                                                |
| 3. Terms for outcomes      | “birth outcome” or “adverse birth outcome” or “adverse pregnancy outcome” or “perinatal morbidity” or “perinatal mortality” or “perinatal outcome” or “premature birth” or “premature delivery” or “very preterm birth” or “preterm birth” or “preterm delivery” or “premature labour” or “preterm labour” or “premature labor” or “preterm labor” or “premature rupture of membranes” or “preterm rupture of membranes” or “preterm premature rupture of membranes” or “low birth weight” or “intrauterine growth retardation” or “intrauterine growth restriction” or “small for gestational age” or “gestational age” or “stillbirth” or “perinatal mortality” or “perinatal morbidity” or “perinatal death” or “neonatal mortality” or “neonatal morbidity” or “neonatal death” or “fetal death” or “miscarriage” or “spontaneous abortion” or “chorioamnionitis” |
| 4. Search = #1 + # 2 + # 3 |                                                                                                                                                                                                                                                                                                                                                                                                                                                                                                                                                                                                                                                                                                                                                                                                                                                                       |

---

Free text terms in the search strategy will use truncated and wildcard forms e.g., pregn\*

Explode function used for MeSH headings

Reference lists of retrieved articles searched

## ONLINE SUPPLEMENTAL FILE

Figure S1 Flow chart of identified and selected studies for inclusion

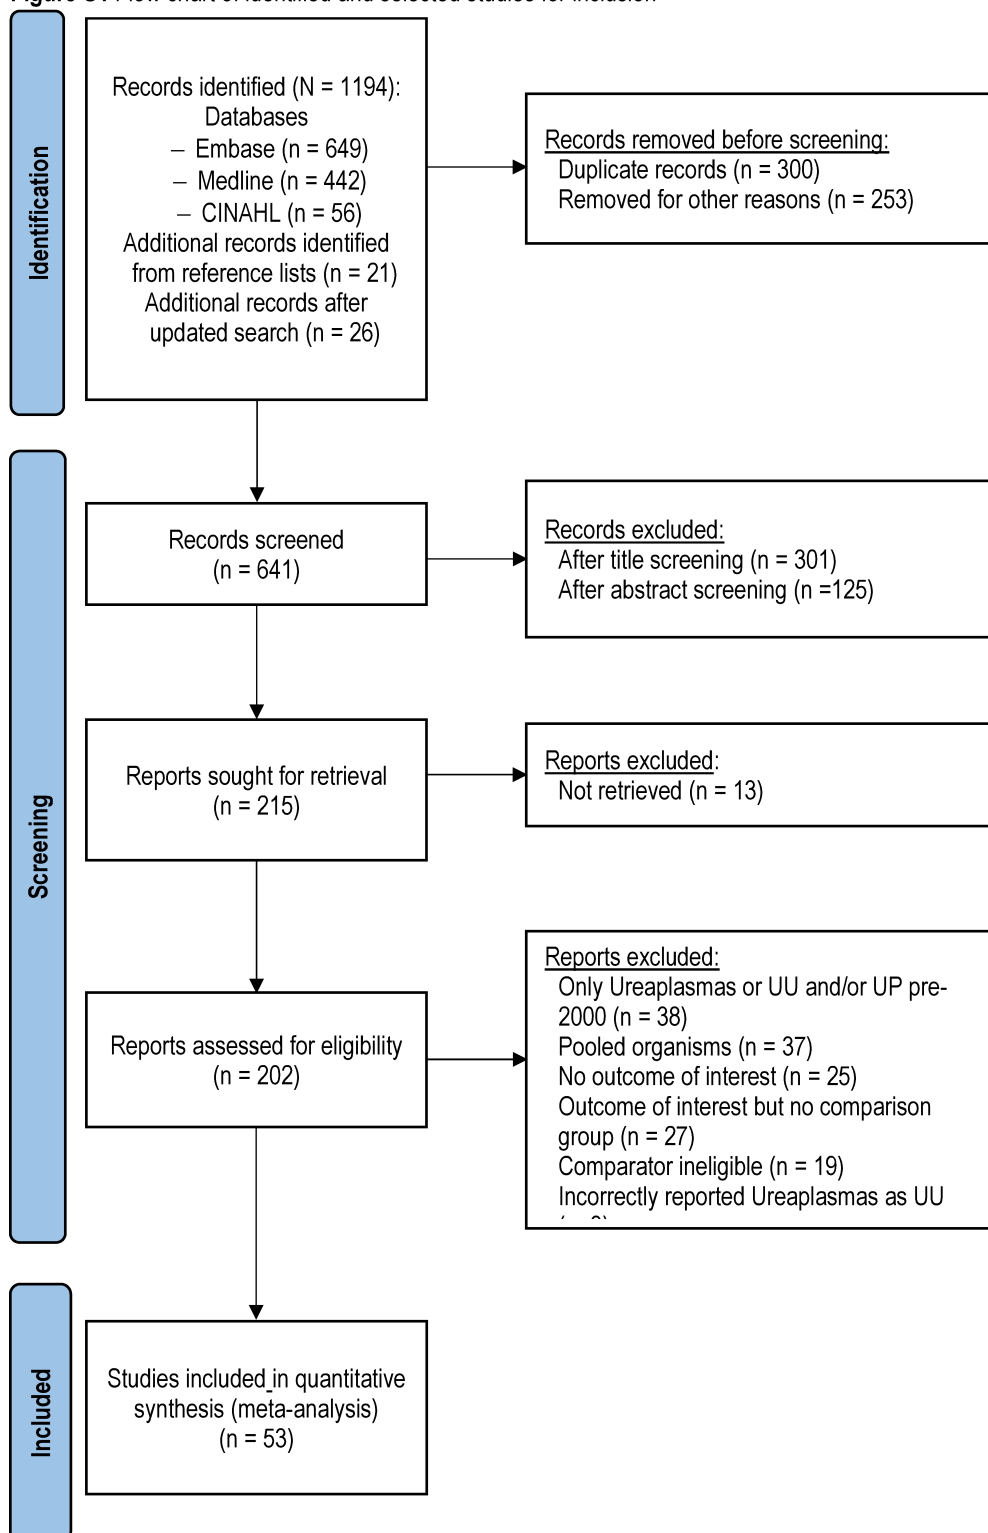

UP, *Ureaplasma parvum*; UU, *Ureaplasma urealyticum*

## ONLINE SUPPLEMENTAL FILE

Table S1 Summary of characteristics of included studies, alphabetical order

| First author, publication year, study reference*† | Country  | Study design | Study population                                                                                 | Total no. of women | Outcomes measured | Specimen type; collection time                                                   | Diagnostic method | BV assessed |
|---------------------------------------------------|----------|--------------|--------------------------------------------------------------------------------------------------|--------------------|-------------------|----------------------------------------------------------------------------------|-------------------|-------------|
| Agger, 2014 <sup>1</sup>                          | USA      | Cohort       | Between 10-14 weeks gestation, initial prenatal visit, currently uncomplicated pregnancy         | 783                | PTB               | Endocervical swab; 1 <sup>st</sup> , 2 <sup>nd</sup> trimester                   | NAAT              | NR          |
| Ahmadi, 2014 <sup>9</sup>                         | Iran     | Case-control | 10-20 weeks (cases), normal pregnancy 20-30 weeks (control)                                      | 218                | SA                | Endocervical swab; 1 <sup>st</sup> , 2 <sup>nd</sup> , 3 <sup>rd</sup> trimester | NAAT              | NR          |
| Berman, 1987 <sup>34</sup>                        | Mexico   | Cohort       | Women at their prenatal care visit, Oct 1980 - Oct 1983; single centre study                     | 1204               | LBW               | Endocervical swab; 1 <sup>st</sup> , 2 <sup>nd</sup> , 3 <sup>rd</sup> trimester | Culture           | NR          |
| Braun, 1971 <sup>35</sup>                         | USA      | Cohort       | Entering antenatal clinic, Feb - Jul 1969; single centre study                                   | 688                | LBW               | Endocervical swab, urine; 1 <sup>st</sup> , 3 <sup>rd</sup> trimester            | Culture           | NR          |
| Cassell, 1983 <sup>32</sup>                       | USA      | Case-control | Attending the amniocentesis for prenatal diagnosis; single centre study                          | 61                 | PTB, PND          | Amniotic fluid; 2 <sup>nd</sup> trimester                                        | Culture           | NR          |
| Chua, 1999 <sup>67</sup>                          | Malaysia | Case-control | 60 sequential mother who delivered and premature babies, Jan 1996-June 1997; single centre study | 120                | PTB               | Endocervical swab; 2 <sup>nd</sup> , 3 <sup>rd</sup> trimester                   | Culture           | NR          |
| Daskalakis, 2009 <sup>65</sup>                    | NR       | Case-control | Singleton, normal pregnancy, >18 years old, mid-trimester amniocentesis, Feb 2006 - Sept 2007    | 613                | PTB               | Amniotic fluid; 2 <sup>nd</sup> trimester                                        | Culture           | NR          |



## ONLINE SUPPLEMENTAL FILE

| First author, publication year, study reference*† | Country      | Study design | Study population                                                                                                                                    | Total no. of women | Outcomes measured | Specimen type; collection time                                                   | Diagnostic method | BV assessed |
|---------------------------------------------------|--------------|--------------|-----------------------------------------------------------------------------------------------------------------------------------------------------|--------------------|-------------------|----------------------------------------------------------------------------------|-------------------|-------------|
| Donders, 2009 <sup>36</sup>                       | Belgium      | Cohort       | Singleton, first antenatal visit between 9 -16 weeks with complete data available on <i>M. hominis</i> cultures, June 2000 - Dec 2001               | 759                | PTB, SA           | Vaginal swab; 1 <sup>st</sup> , 2 <sup>nd</sup> trimester                        | Culture           | Yes         |
| Embree, 1980 <sup>54</sup>                        | Canada       | Case-control | Single centre, deliveries between May 1977 - Jan 1978                                                                                               | 554                | SA, PND           | Placenta; post-partum                                                            | Culture           | NR          |
| Farhadifar, 2016 <sup>11</sup>                    | Iran         | Case-control | Admitted into obstetrics and gynaecology wards, no antibiotics two weeks before sampling, no chronic disease, vaginal infection, Aug 2012- Jan 2013 | 218                | SA                | Endocervical swab; 1 <sup>st</sup> , 2 <sup>nd</sup> , 3 <sup>rd</sup> trimester | NAAT              | NR          |
| Freitas, 2018 <sup>55</sup>                       | Canada       | Case-control | Spontaneous preterm birth and term deliveries, multicentre study                                                                                    | 216                | PTB               | Vaginal swab; 2 <sup>nd</sup> trimester                                          | NAAT              | NR          |
| Gerber, 2003 <sup>37</sup>                        | NR           | Cohort       | Transabdominal amniocentesis at 15-17 weeks gestation, singleton without complicated pregnancy                                                      | 254                | PTB, PROM         | Amniotic fluid; 2 <sup>nd</sup> trimester                                        | NAAT              | NR          |
| González Bosquet, 2006 <sup>66</sup>              | NR           | Case-control | Case: 24-34 weeks PTL, intact membranes; control: no history of preterm birth at same stage of delivery                                             | 250                | PTB               | Endocervical swab; NR                                                            | Culture           | NR          |
| Govender, 2009 <sup>38</sup>                      | South Africa | Cohort       | Low risk obstetric patients at first prenatal visit (16-23 weeks gestation)                                                                         | 199                | PTB               | Endocervical swab; 2 <sup>nd</sup> trimester                                     | NAAT              | NR          |

## ONLINE SUPPLEMENTAL FILE

| First author, publication year, study reference*† | Country        | Study design    | Study population                                                                                       | Total no. of women | Outcomes measured | Specimen type; collection time                                                   | Diagnostic method | BV assessed |
|---------------------------------------------------|----------------|-----------------|--------------------------------------------------------------------------------------------------------|--------------------|-------------------|----------------------------------------------------------------------------------|-------------------|-------------|
| Grattard, 1995 <sup>71</sup>                      | France         | Cross-sectional | Women who delivered between Feb - May 1993 in obstetrical ward and their neonates; single centre study | 208                | PTB, LBW PROM,    | Endocervical swab; post-partum                                                   | Culture           | NR          |
| Harada, 2008 <sup>56</sup>                        | Japan          | Case-control    | Premature and term deliveries, Jan 2006 - July 2007                                                    | 145                | PTB               | Endocervical swab; 2 <sup>nd</sup> , 3 <sup>rd</sup> trimester                   | NAAT, Culture     | NR          |
| Harrison, 1983 <sup>39</sup>                      | USA            | Cohort          | Enrolled at their first prenatal visit; single centre study                                            | 860                | SA                | Endocervical swab; 1 <sup>st</sup> , 2 <sup>nd</sup> , 3 <sup>rd</sup> trimester | Culture, ELISA    | NR          |
| Hillier, 1988 <sup>57</sup>                       | USA            | Case-control    | Age >16 years, no antibiotics in previous 2 weeks, no known fetal anomaly, June 1984 - June 1985       | 112                | PTB               | Placenta; post-partum                                                            | Culture           | Yes         |
| Hillier, 1995 <sup>33</sup>                       | USA            | Cohort          | > 16 years, singleton pregnancies at routine prenatal visits (23 to 26 weeks), between 1984 -1989      | 10 397             | PTB               | Endocervical swab; 2 <sup>nd</sup> trimester                                     | Culture           | Yes         |
| Holst, 1994 <sup>58</sup>                         | Sweden         | Case-control    | Women presenting in PTL; controls were women with no pregnancy history                                 | 87                 | PTB               | Endocervical swab; 3 <sup>rd</sup> trimester                                     | Culture           | Yes         |
| Jones, 2009 <sup>10</sup>                         | United Kingdom | Case-control    | Cases: <32 weeks gestation; control: >37 weeks gestation; single centre study                          | 74                 | PTB, PROM         | Placenta; post-partum                                                            | NAAT              | NR          |
| Kacerovsky, 2009 <sup>68</sup>                    | NR             | Case-control    | Pregnancy with PPROM, Jan 2004 - Feb 2007; single centre study                                         | 450                | PROM              | Endocervical swab; 2 <sup>nd</sup> , 3 <sup>rd</sup> trimester                   | Culture           | NR          |

## ONLINE SUPPLEMENTAL FILE

| First author, publication year, study reference*† | Country        | Study design    | Study population                                                                                     | Total no. of women | Outcomes measured  | Specimen type; collection time                                 | Diagnostic method | BV assessed |
|---------------------------------------------------|----------------|-----------------|------------------------------------------------------------------------------------------------------|--------------------|--------------------|----------------------------------------------------------------|-------------------|-------------|
| Kataoka, 2006 <sup>40</sup>                       | Japan          | Cohort          | Singleton pregnancies at <11 weeks of gestation, Jan - Dec 2002; single centre study                 | 1040               | PTB, PROM, SA, PND | Vaginal swab; 1 <sup>st</sup> trimester                        | NAAT              | NR          |
| Koucky, 2016 <sup>41</sup>                        | Czech Republic | Cohort          | Threatened premature deliveries, between Aug 2012 - Feb 2013                                         | 63                 | PTB                | Vaginal swab; 2 <sup>nd</sup> , 3 <sup>rd</sup> trimester      | NAAT              | NR          |
| Kumar, 2006 <sup>69</sup>                         | India          | Case-control    | Women in spontaneous premature/ term labour with or without rupture of membrane; single centre study | 120                | PTB                | Vaginal swab; 3 <sup>rd</sup> trimester                        | Culture           | Yes         |
| Kundsin, 1984 <sup>72</sup>                       | USA            | Cross-sectional | Deliveries between Nov 1978 - Jun 1981; single centre study                                          | 801                | PND                | Placenta; post-partum                                          | Culture           | NR          |
| Kwak, 2014 <sup>50</sup>                          | South Korea    | Cohort          | Women with spontaneous premature labour or preterm PROM, Dec 2005 - Apr 2007; single centre study    | 179                | PTB                | Vaginal swab; 3 <sup>rd</sup> trimester                        | Culture           | NR          |
| Lee, 2016 <sup>6</sup>                            | South Korea    | Cohort          | Aged 15 - 47, delivered babies between Jun 2009 - May 2014; single centre study                      | 1,035              | PTB, PROM, SA      | Vaginal swab; NR                                               | Culture           | NR          |
| Luton, 1994 <sup>8</sup>                          | Gabon          | Cohort          | Singleton pregnancy at <20 weeks gestation, Sept 1990 - Nov 1991                                     | 218                | PTB, LBW, PND      | Endocervical swab; 1 <sup>st</sup> , 2 <sup>nd</sup> trimester | Culture           | NR          |
| McCormack, 1975 <sup>73</sup>                     | USA            | Cross-sectional | Vaginal deliveries; single centre study                                                              | 327                | LBW, PND           | Blood; post-partum                                             | Culture           | NR          |

## ONLINE SUPPLEMENTAL FILE

| First author, publication year, study reference*† | Country        | Study design | Study population                                                                                                         | Total no. of women | Outcomes measured | Specimen type; collection time                                 | Diagnostic method | BV assessed |
|---------------------------------------------------|----------------|--------------|--------------------------------------------------------------------------------------------------------------------------|--------------------|-------------------|----------------------------------------------------------------|-------------------|-------------|
| McDonald, 1992 <sup>59</sup>                      | Australia      | Case-control | Women who booked at one of 4 study centres, Oct 1986 - Dec 1988; multicentre study                                       | 2190               | PTB, PROM         | Endocervical swab; 2 <sup>nd</sup> trimester                   | Culture           | NR          |
| McDonald, 1994 <sup>42</sup>                      | Australia      | Cohort       | Patients attending the antenatal clinic, Oct 1986 - May 1990                                                             | 560                | PTB               | Endocervical swab; 2 <sup>nd</sup> , 3 <sup>rd</sup> trimester | Culture           | NR          |
| Menard, 2010 <sup>43</sup>                        | France         | Cohort       | Admitted preterm labour with no pregnancy related complications between July 2007 - July 2008                            | 90                 | PTB               | Vaginal swab; 2 <sup>nd</sup> , 3 <sup>rd</sup> trimester      | NAAT              | Yes         |
| Minkoff, 1984 <sup>44</sup>                       | USA            | Cohort       | Delivery between Mar - Sept 1982; single centre study                                                                    | 250                | PTB, PROM         | Vaginal swab; 1 <sup>st</sup> , 2 <sup>nd</sup> trimester      | Culture           | Yes         |
| Mitsunari, 2005 <sup>60</sup>                     | Japan          | Case-control | Singleton pregnancy delivery, between Jan 2002 - Sept 2003                                                               | 82                 | PTB, PROM         | Endocervical swab; 2 <sup>nd</sup> , 3 <sup>rd</sup> trimester | NAAT              | NR          |
| Montenegro, 2019 <sup>70</sup>                    | Colombia       | Case-control | Pregnant women >18 years, no pregnancy related problems, non-smokers, no alcohol, no antibiotic                          | 211                | PTB, PROM         | Placenta; post-partum                                          | NAAT              | NR          |
| Munday, 1984 <sup>61</sup>                        | United Kingdom | Case-control | Women admitted with vaginal bleeding before 28 weeks gestation and women attending one antenatal clinic at same hospital | 241                | SA                | Endocervical swab; 2 <sup>nd</sup> , 3 <sup>rd</sup> trimester | Culture           | NR          |

## ONLINE SUPPLEMENTAL FILE

| First author, publication year, study reference*† | Country             | Study design    | Study population                                                                                                 | Total no. of women | Outcomes measured | Specimen type; collection time                                                   | Diagnostic method | BV assessed |
|---------------------------------------------------|---------------------|-----------------|------------------------------------------------------------------------------------------------------------------|--------------------|-------------------|----------------------------------------------------------------------------------|-------------------|-------------|
| Nasution, 2007 <sup>75</sup>                      | NR                  | Cross-sectional | Women admitted with preterm PROM (<37weeks), normal vaginal deliveries at term, and women with post-partum fever | 120                | PROM              | Placenta; post-partum                                                            | NAAT              | NR          |
| Nguyen, 2004 <sup>45</sup>                        | Switzerland         | Cohort          | Women with transabdominal amniocentesis at 15 - 17 weeks gestation; single centre study                          | 456                | PTB, PROM, PND    | Amniotic fluid; 2 <sup>nd</sup> trimester                                        | NAAT              | NR          |
| Odendaal, 2002 <sup>51</sup>                      | South Africa        | Cohort          | Primigravid, first visit, 16 - 26 weeks with previous preterm labour or miscarriage, May - Dec 1996              | 395                | PTB, SA, PND      | Endocervical swab; 2 <sup>nd</sup> trimester                                     | Culture           | Yes         |
| Oliveira, 2020 <sup>7</sup>                       | Brazil              | Case-control    | > 18 years old, cases: 8 - 20 weeks gestation; Control vaginal delivery at 38 - 40 weeks, Jul 2017 - Aug 2018    | 109                | SA                | Endocervical swab; 1 <sup>st</sup> , 2 <sup>nd</sup> , 3 <sup>rd</sup> trimester | NAAT              | NR          |
| Payne, 2014 <sup>62</sup>                         | China and Australia | Case-control    | Singleton pregnancy referred for genetic amniocentesis                                                           | 972                | PTB               | Amniotic fluid; 2 <sup>nd</sup> trimester                                        | NAAT              | NR          |
| Payne, 2016 <sup>46</sup>                         | Australia           | Cohort          | Low risk singleton pregnancy, 18 -40 years old, at 1 <sup>st</sup> or 2 <sup>nd</sup> trimester when enrolled    | 191                | PTB               | Vaginal swab; 1 <sup>st</sup> , 2 <sup>nd</sup> , 3 <sup>rd</sup> trimester      | NAAT, Culture     | NR          |
| Payne, 2021 <sup>15</sup>                         | Australia           | Cohort          | Nulliparous and multiparous, singleton pregnancy, ≥16 years between 12 - 23 weeks gestation                      | 1000               | PTB               | Vaginal swab; 1 <sup>st</sup> , 2 <sup>nd</sup> trimester                        | NAAT              | NR          |

## ONLINE SUPPLEMENTAL FILE

| First author, publication year, study reference*† | Country        | Study design    | Study population                                                                                     | Total no. of women | Outcomes measured | Specimen type; collection time                                 | Diagnostic method | BV assessed |
|---------------------------------------------------|----------------|-----------------|------------------------------------------------------------------------------------------------------|--------------------|-------------------|----------------------------------------------------------------|-------------------|-------------|
| Peretz, 2020 <sup>12</sup>                        | Israel         | Cohort          | Women, 18 - 45 years, at any stage of labour and any mode of delivery, between Jun 2014 - Jan 2016   | 214                | PTB, LBW          | Vaginal swab; post-partum                                      | NAAT              | NR          |
| Perni, 2004 <sup>52</sup>                         | NR             | Cohort          | Singleton pregnancy: underwent transabdominal amniocentesis at 15-19 weeks with clear amniotic fluid | 193                | PTB, PROM         | Amniotic fluid; 2 <sup>nd</sup> trimester                      | NAAT              | NR          |
| Rittenschober-Böhm, 2018 <sup>47</sup>            | Austria        | Cohort          | Attending routine nuchal translucency screening between 12 - 14 weeks gestation; multicentre study   | 4330               | PTB               | Endocervical swab; 1 <sup>st</sup> , 2 <sup>nd</sup> trimester | NAAT              | Yes         |
| Schwab, 2015 <sup>53</sup>                        | Indonesia      | Cohort          | 2 <sup>nd</sup> trimester, from Feb - Jun 2005; multicentre study                                    | 159                | PTB               | Vaginal swab; 2 <sup>nd</sup> trimester                        | NAAT              | Yes         |
| Sperling, 1988 <sup>49</sup>                      | USA            | Cohort          | Clinical diagnosis of intraamniotic infection, July 1979 - Dec 1986                                  | 409                | LBW               | Amniotic fluid; NR                                             | Culture           | NR          |
| Sweeney, 2016 <sup>74</sup>                       | USA            | Cross-sectional | Term deliveries, no HIV infection, congenital infection, or fetal malformation, Jul 2010 - Apr 2013  | 535                | PTB               | Placenta; post-partum                                          | NAAT, Culture     | NR          |
| Toth, 1992 <sup>63</sup>                          | United Kingdom | Case-control    | Admitted for delivery between Jan 1985 - Dec 1986                                                    | 100                | PTB               | Endocervical swab; NR                                          | Culture           | NR          |
| Usui, 2002 <sup>48</sup>                          | Japan          | Cohort          | Singleton pregnancy attending first antenatal visit, Jan 1995 - Mar 1998                             | 1958               | PTB               | Endocervical swab; 1 <sup>st</sup> , 3 <sup>rd</sup> trimester | Culture           | NR          |

## ONLINE SUPPLEMENTAL FILE

| First author, publication year, study reference*† | Country     | Study design | Study population                                | Total no. of women | Outcomes measured | Specimen type; collection time            | Diagnostic method | BV assessed |
|---------------------------------------------------|-------------|--------------|-------------------------------------------------|--------------------|-------------------|-------------------------------------------|-------------------|-------------|
| Yoon, 2001 <sup>64</sup>                          | South Korea | Case-control | Women who underwent mid-trimester amniocentesis | 114                | PTB, PROM         | Amniotic fluid; 2 <sup>nd</sup> trimester | NAAT              | NR          |

LBW, infant low birth weight, defined as birth weight <2.5kg; NAAT, nucleic acid amplification tests; NR, not reported; PTB, preterm birth - defined as birth before 37 weeks gestation; PPRM, preterm premature rupture of membranes; PROM: premature rupture of membrane - defined as clinically confirmed rupture of membrane before 37weeks of gestation; PND, perinatal or neonatal death- defined as stillbirth (death after 20/40 gestation) or neonatal death (death <28 days since birth), unless otherwise defined by the study authors; SA: spontaneous abortion - defined as pregnancy loss at <20 weeks gestation or as defined by author; USA, United States of America.

\* Study reference is the reference number cited in the main manuscript.

† Additional summary information about the characteristics of included studies in Tables S2.1-S2.3, S3.1-S3.3, S4.1-S4.3, S5

## ONLINE SUPPLEMENTAL FILE

Total number of studies = 53

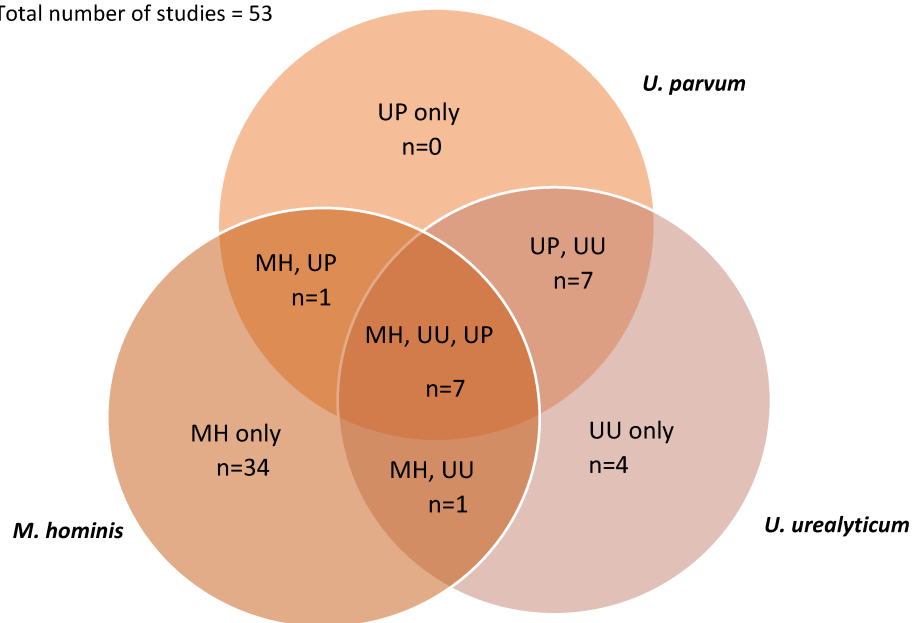

**Figure S2** Venn diagram showing organisms reported in in the 53 articles included in the systematic review.

MH, *M. hominis*; UP, *U. parvum*; UU, *U. urealyticum*



## ONLINE SUPPLEMENTAL FILE

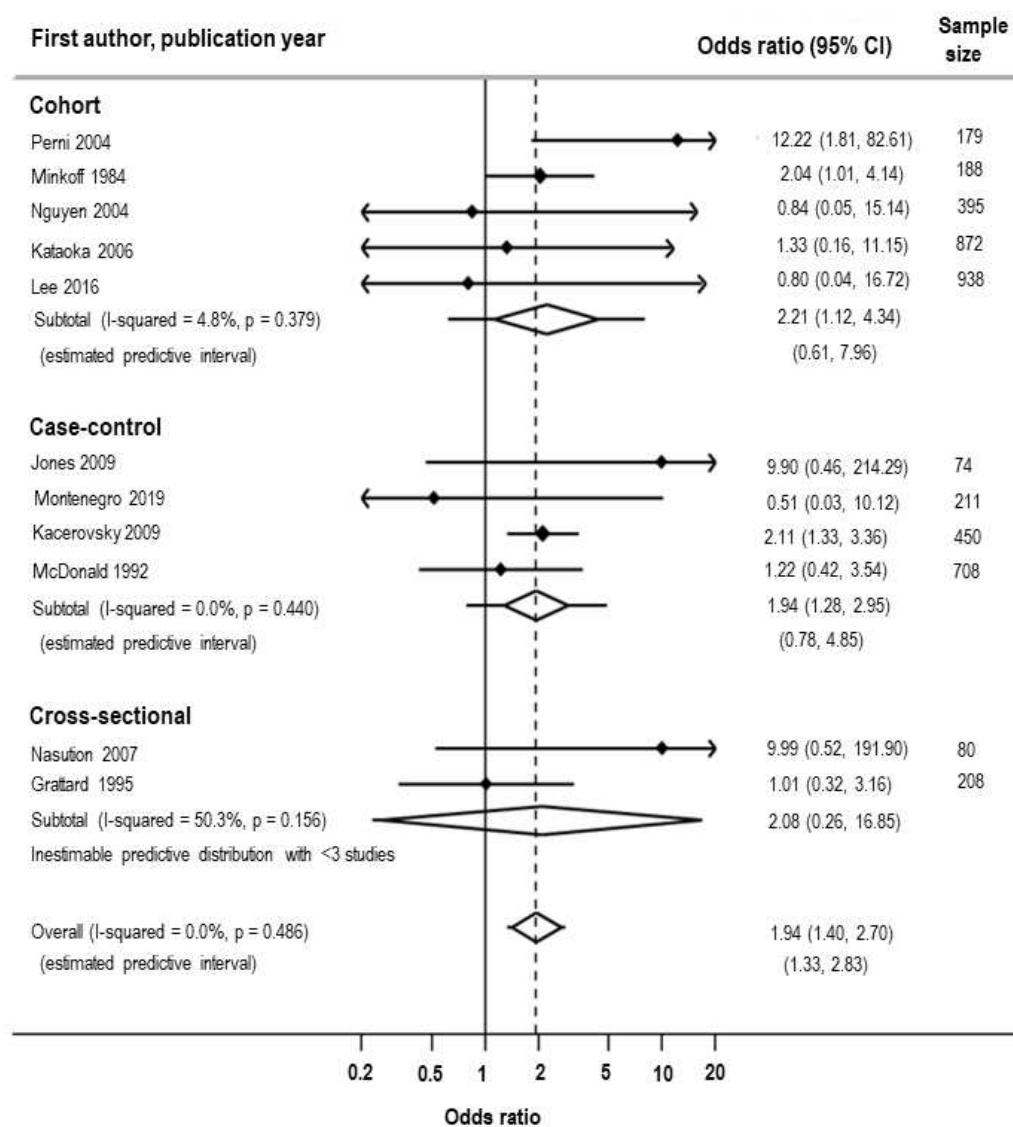

**Figure S3.1** Forest plot of association between *M. hominis* and premature rupture of membrane, random effects model.

Solid diamond shows the point estimate and study weight. Solid line shows 95% confidence intervals (CI) for each study. The open diamond shows the point estimate and 95% CI of the summary estimate. Solid lines extending from the diamond show the prediction interval.

## ONLINE SUPPLEMENTAL FILE

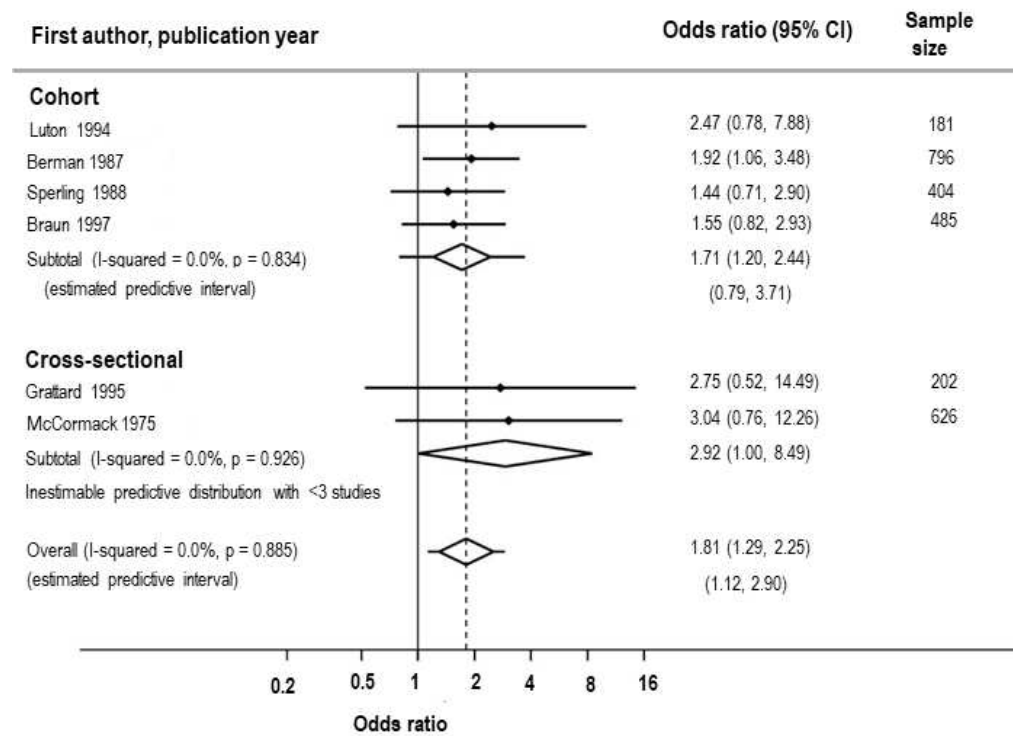

**Figure S3.2** Forest plot of association between *M. hominis* and low birthweight, random effects model. Solid diamond shows the point estimate and study weight. Solid line shows 95% confidence intervals (CI) for each study. The open diamond shows the point estimate and 95% CI of the summary estimate. Solid lines extending from the diamond show the prediction interval.

## ONLINE SUPPLEMENTAL FILE

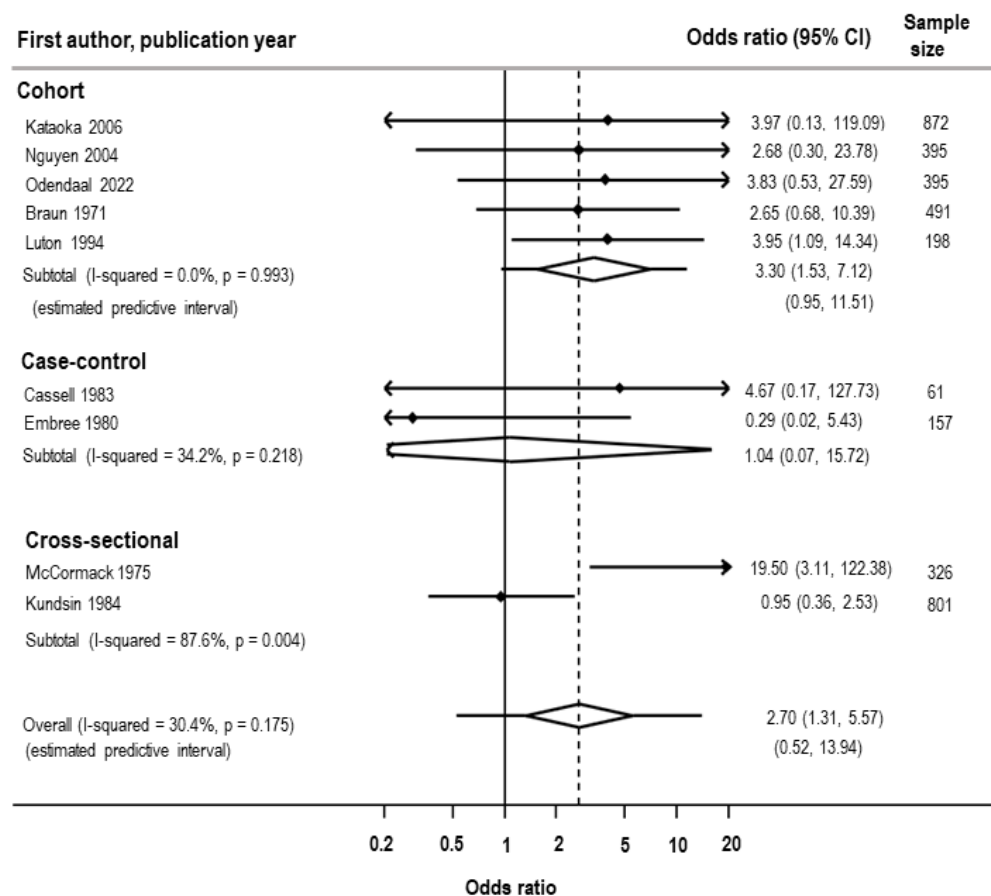

**Figure S3.3** Forest plot of association between *M. hominis* and perinatal death random effects model. Solid diamond shows the point estimate and study weight. Solid line shows 95% confidence intervals (CI) for each study. The open diamond shows the point estimate and 95% CI of the summary estimate. Solid lines extending from the diamond show the prediction interval.

## ONLINE SUPPLEMENTAL FILE

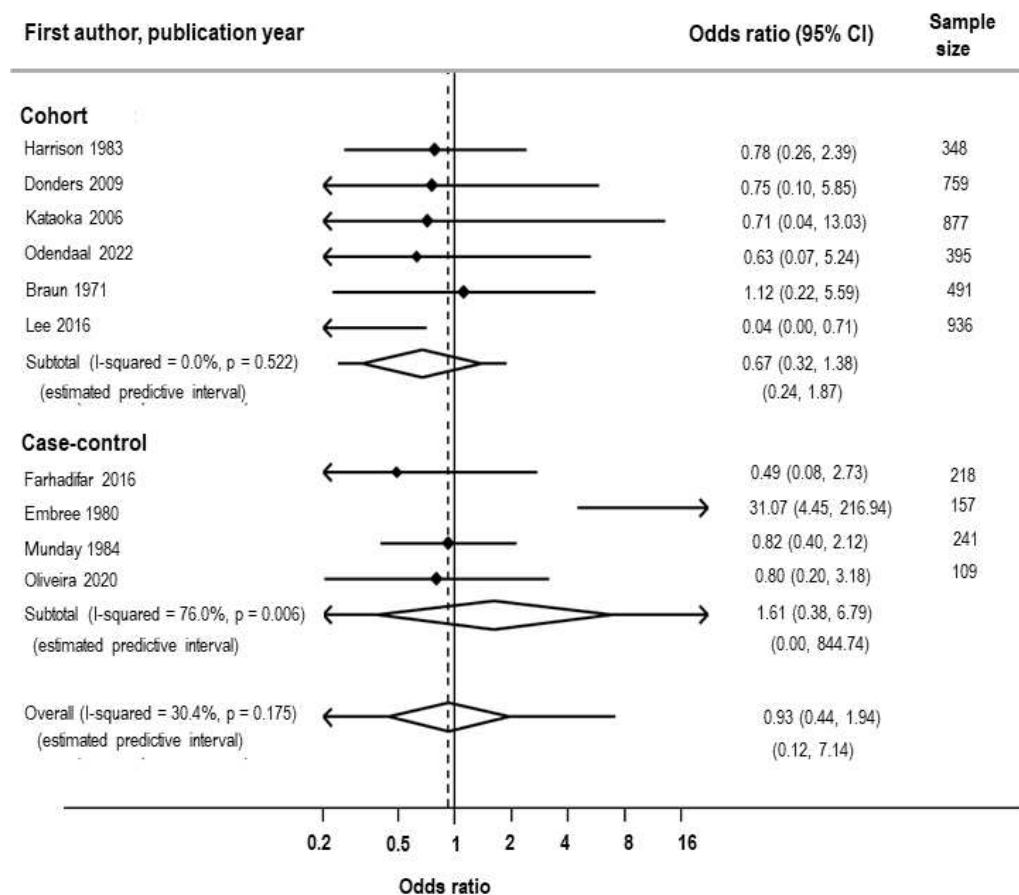

**Figure S3.4** Forest plot of association between *M. hominis* and spontaneous abortion random effects model. Solid diamond shows the point estimate and study weight. Solid line shows 95% confidence intervals (CI) for each study. The open diamond shows the point estimate and 95% CI of the summary estimate. Solid lines extending from the diamond show the prediction interval.

## ONLINE SUPPLEMENTAL FILE

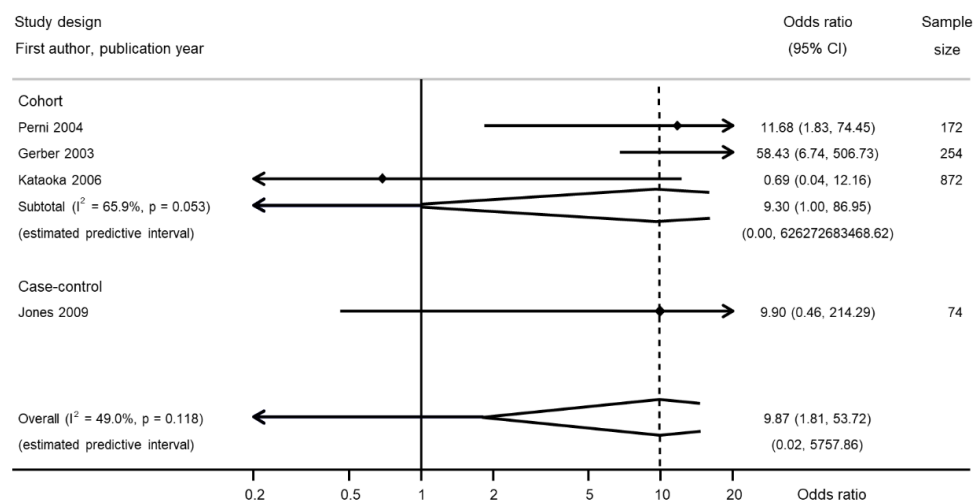

**Figure S3.5** Forest plot of association between *U. urealyticum* and premature rupture of membrane, random effects model.

Solid diamond shows the point estimate and study weight. Solid line shows 95% confidence intervals (CI) for each study. The open diamond shows the point estimate and 95% CI of the summary estimate. Solid lines extending from the diamond show the prediction interval.

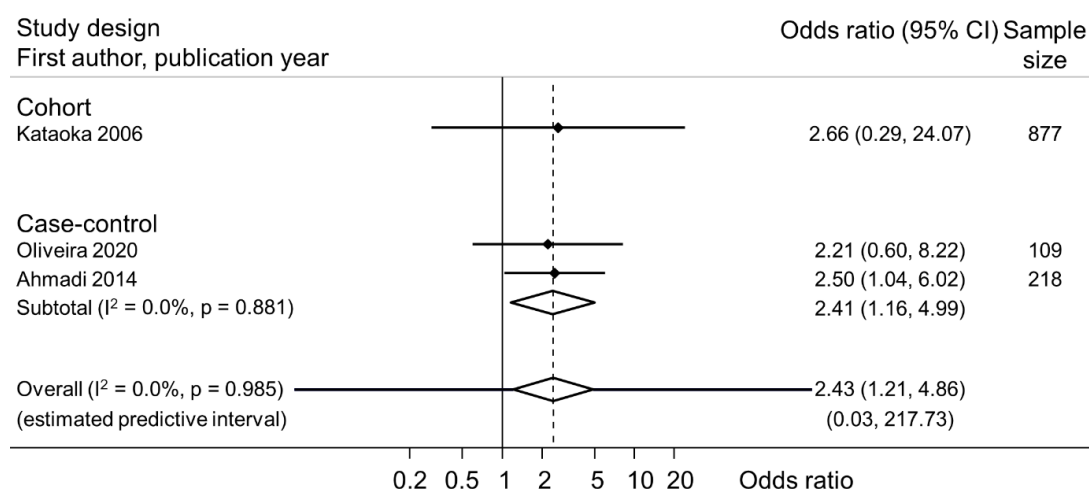

**Figure S3.6** Forest plot of association between *U. urealyticum* and spontaneous abortion, random effects model.

Solid diamond shows the point estimate and study weight. Solid line shows 95% confidence intervals (CI) for each study. The open diamond shows the point estimate and 95% CI of the summary estimate. Solid lines extending from the diamond show the prediction interval.

## ONLINE SUPPLEMENTAL FILE

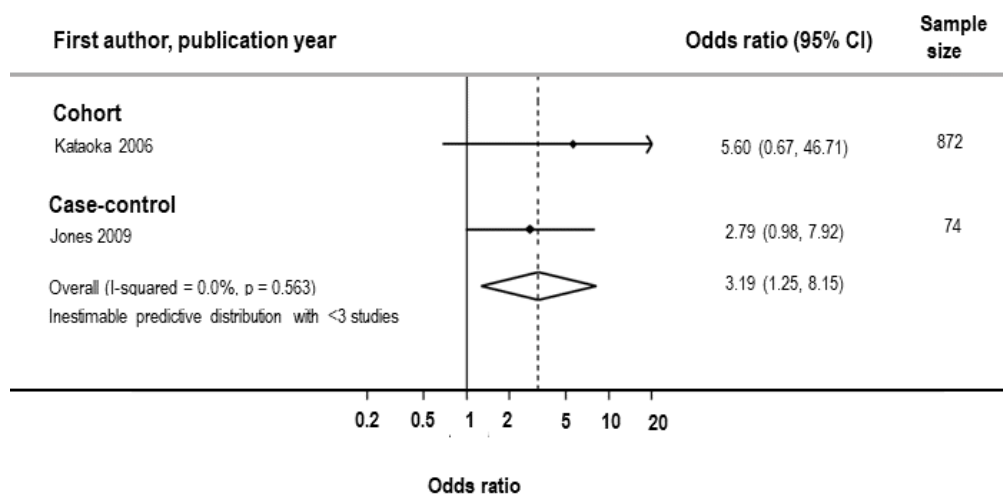

**Figure S3.7** Forest plot of association between *U. parvum* and premature rupture of membrane, random effects model.

Solid diamond shows the point estimate and study weight. Solid line shows 95% confidence intervals (CI) for each study. The open diamond shows the point estimate and 95% CI of the summary estimate. Solid lines extending from the diamond show the prediction interval.

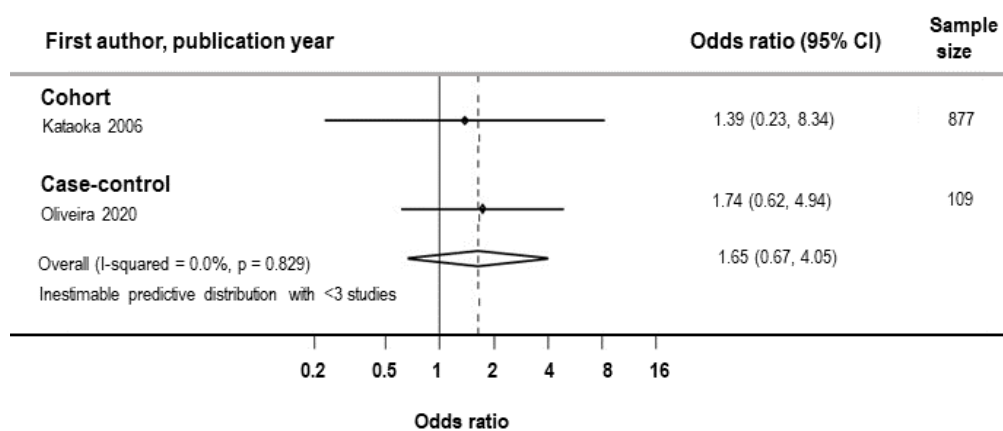

**Figure S3.8** Forest plot of association between *U. parvum* and spontaneous abortion random effects model.

Solid diamond shows the point estimate and study weight. Solid line shows 95% confidence intervals (CI) for each study. The open diamond shows the point estimate and 95% CI of the summary estimate. Solid lines extending from the diamond show the prediction interval.

## ONLINE SUPPLEMENTAL FILE

Table S2.1 Descriptive tables: cohort studies (n=26), in alphabetical order

| First author, publication year, study reference | Organism reported | Outcomes                 | Definition provided                      | Effect size reported by study authors, OR or RR (95% CI) |                                                                     |                                                                                                                                                                                         |
|-------------------------------------------------|-------------------|--------------------------|------------------------------------------|----------------------------------------------------------|---------------------------------------------------------------------|-----------------------------------------------------------------------------------------------------------------------------------------------------------------------------------------|
|                                                 |                   |                          |                                          | Organism_outcome                                         | Unadjusted OR/RR                                                    | Adjusted OR, aOR                                                                                                                                                                        |
| Agger, 2014 <sup>1</sup>                        | MH<br>UU<br>UP    | PTB                      | Born < 37 weeks                          | MH_PT<br>UU_PT<br>UP_PT                                  | OR 1.72 (0.91, 3.28)<br>OR 1.64 (0.67, 4.05)<br>OR 1.23 (0.7, 2.15) | 'Final model... factors... from preliminary models with p>0.15.'<br>No organism in final multivariable model for PTB <37 weeks.<br>MH in final model PTB< 35 weeks, aOR 3.6 (1.4 - 9.7) |
| Berman, 1987 <sup>34</sup>                      | MH                | LBW                      | < 2.5kg                                  | MH_LBW                                                   | RR 1.8 (1.0, 3.1)                                                   | Birth weight as continuous variable, p=0.01; adjusted for parity, maternal height, weight, marital status, age, enrolment, gestation, <i>C. trachomatis</i>                             |
| Braun, 1971 <sup>35</sup>                       | MH                | LBW<br>SA<br>PND         | < 2.5kg<br>Not defined<br>Not defined    | NR                                                       |                                                                     | No multivariable analysis                                                                                                                                                               |
| Donders, 2009 <sup>36</sup>                     | MH                | PTB<br>SA                | Born < 37 weeks<br>*                     | MH_PT                                                    | OR 8.5 (2.8, 25.5)                                                  | No multivariable analysis                                                                                                                                                               |
| Gerber, 2003 <sup>37</sup>                      | UU                | PTB<br>PROM              | Born < 37 weeks<br>†                     | NR                                                       |                                                                     | No multivariable analysis                                                                                                                                                               |
| Govender, 2009 <sup>38</sup>                    | MH, UU, UP        | PTB                      | Born < 37 weeks                          | NR                                                       |                                                                     | No multivariable analysis                                                                                                                                                               |
| Harrison, 1983 <sup>39</sup>                    | MH                | SA                       | *                                        | NR                                                       |                                                                     | No multivariable analysis                                                                                                                                                               |
| Hillier, 1995 <sup>33</sup>                     | MH                | PTB                      | Born < 37 weeks                          | MH_PT                                                    |                                                                     | No multivariable analysis                                                                                                                                                               |
| Kataoka, 2006 <sup>40</sup>                     | MH, UU, UP        | PTB<br>PROM<br>SA<br>PND | Born < 37 weeks<br>Not defined<br>*<br>‡ | NR                                                       |                                                                     | No multivariable analysis                                                                                                                                                               |
| Koucky, 2016 <sup>41</sup>                      | UU                | PTB                      | Born < 37 weeks                          | NR                                                       |                                                                     | aOR 3.4 (1.3, 5.5); adjusted for progesterone treatment, other factors not reported 5.46 (1.80, 16.62)                                                                                  |
| Kwak, 2014 <sup>50</sup>                        | MH                | PTB                      | Born < 37 weeks                          | NR                                                       |                                                                     | No multivariable analysis                                                                                                                                                               |

## ONLINE SUPPLEMENTAL FILE

| First author, publication year, study reference | Organism reported | Outcomes           | Definition provided                 | Effect size reported by study authors, OR or RR (95% CI) |                    |                                                                                       |
|-------------------------------------------------|-------------------|--------------------|-------------------------------------|----------------------------------------------------------|--------------------|---------------------------------------------------------------------------------------|
|                                                 |                   |                    |                                     | Organism_outcome                                         | Unadjusted OR/RR   | Adjusted OR, aOR                                                                      |
| Lee, 2016 <sup>6</sup>                          | MH                | PTB<br>PROM<br>SA  | Born < 37 weeks<br>Not defined<br>* | NR                                                       |                    | No multivariable analysis                                                             |
| Luton, 1994 <sup>8</sup>                        | MH                | PTB<br>LBW<br>PND  | Born < 37 weeks<br>< 2.5kg<br>‡     | NR                                                       |                    | No multivariable analysis                                                             |
| McDonald, 1994 <sup>42</sup>                    | MH                | PTB                | Born < 37 weeks                     | NR                                                       |                    | No multivariable analysis                                                             |
| Menard, 2010 <sup>43</sup>                      | MH                | PTB                | Born < 37 weeks                     | NR                                                       |                    | No multivariable analysis                                                             |
| Minkoff, 1984 <sup>44</sup>                     | MH                | PTB<br>PROM        | Born < 37 weeks<br>†                | NR                                                       |                    | Stepwise multiple logistic regression. Results for MH not reported for either outcome |
| Nguyen, 2004 <sup>45</sup>                      | MH                | PTB<br>PROM<br>PND | Born < 37 weeks<br>†<br>Not defined | MH_PT                                                    | RR 4.6 (1.7, 12.8) | No multivariable analysis                                                             |
| Odendaal, 2002 <sup>51</sup>                    | MH                | PTB<br>SA<br>PND   | Born < 37 weeks<br>*<br>Not defined | NR                                                       |                    | No multivariable analysis                                                             |
| Payne, 2016 <sup>46</sup>                       | MH, UU, UP        | PTB                | Born < 37 weeks                     | NR                                                       |                    | No multivariable analysis                                                             |
| Payne, 2021 <sup>15</sup>                       | MH, UU, UP        | PTB                | Born < 37 weeks                     | NR                                                       |                    | No multivariable analysis                                                             |
| Peretz, 2020 <sup>12</sup>                      | UU, UP            | PTB<br>LBW         | Born < 37 weeks<br>< 2.5kg          | NR                                                       |                    | No multivariable analysis                                                             |
| Perni, 2004 <sup>52</sup>                       | MH, UU            | PTB<br>PROM        | Born < 37 weeks<br>†                | NR                                                       |                    | No multivariable analysis                                                             |



## ONLINE SUPPLEMENTAL FILE

| First author, publication year, study reference | Organism reported | Outcomes | Definition provided | Effect size reported by study authors, OR or RR (95% CI) |                                  |                                                                                                                          |
|-------------------------------------------------|-------------------|----------|---------------------|----------------------------------------------------------|----------------------------------|--------------------------------------------------------------------------------------------------------------------------|
|                                                 |                   |          |                     | Organism_outcome                                         | Unadjusted OR/RR                 | Adjusted OR, aOR                                                                                                         |
| Rittenschöber-Böhm, 2018 <sup>47</sup>          | UU                | PTB      | Born < 37 weeks     | UU_PTB                                                   | OR 1.4 (0.9, 2.3)                | aOR 1.4 (0.8, 2.2)                                                                                                       |
|                                                 | UP                |          |                     | UP_PTB                                                   | OR 1.7 (1.3, 2.2)                | aOR 1.6 (1.2, 2.1)<br>Adjusted for age, smoking, history of PTB, BV, smoking UU or UP                                    |
| Schwab, 2015 <sup>53</sup>                      | MH                | PTB      | Born < 37 weeks     | MH_PTB                                                   | OR 0.26 (0.03, 1.13)             | No multivariable analysis                                                                                                |
| Sperling, 1988 <sup>49</sup>                    | MH                | LBW      | < 2.5kg             | NR                                                       |                                  | No multivariable analysis                                                                                                |
| Usui, 2002 <sup>48</sup>                        | MH                | PTB      | Born < 37 weeks     | NR                                                       | OR not reported by study authors | aOR 1.5 (0.8, 2.7)<br>Adjusted for <i>Lactobacillus</i> spp., <i>E. coli</i> , glucose non-fermenting Gram-negative rods |

LBW: low birth weight, defined as birth weight <2.5kg; NAAT, nucleic acid amplification tests; NR, not reported; MH, *M. hominis*; PND, perinatal death; PROM, premature rupture of membrane; PTB, preterm birth; SA: spontaneous abortion; UP, *U. parvum*; UU, *U. urealyticum*.

Study reference is the reference number cited in the main manuscript.

\*SA defined as pregnancy loss at <20 weeks gestation or as defined by author;

†PROM defined as rupture of membrane before 37 completed weeks or as defined by author;

‡ Perinatal death, defined as birth after 20 weeks gestation (stillbirth) or death within 28 days after birth (neonatal death) unless otherwise defined by the study authors.

## ONLINE SUPPLEMENTAL FILE

Table S2.2 Descriptive tables: case-control studies (n=22), in alphabetical order

| First author, publication year, study reference | Organism reported | Outcome | Definition Provided | OR/ RR (95% CI) reported by study authors |                      |                           |
|-------------------------------------------------|-------------------|---------|---------------------|-------------------------------------------|----------------------|---------------------------|
|                                                 |                   |         |                     | Organism_outcome                          | Unadjusted, OR       | Adjusted, aOR             |
| Ahmadi, 2014 <sup>9</sup>                       | UU                | SA      | *                   | NR                                        |                      | No multivariable analysis |
| Cassell, 1983 <sup>32</sup>                     | MH                | PTB     | Born < 37 weeks     | NR                                        |                      | No multivariable analysis |
|                                                 |                   | PND     | ‡                   |                                           |                      |                           |
| Chua, 1999 <sup>67</sup>                        | MH                | PTB     | Born < 37 weeks     | NR                                        |                      | No multivariable analysis |
| Daskalakis, 2009, <sup>65</sup>                 | MH                | PTB     | Born < 37 weeks     | NR                                        |                      | No multivariable analysis |
| Embree, 1980 <sup>54</sup>                      | MH                | SA      | Not defined         | NR                                        |                      | No multivariable analysis |
|                                                 |                   | PND     | Partially defined   |                                           |                      |                           |
| Farhadifar, 2017 <sup>11</sup>                  | MH                | SA      | *                   | MH_SA                                     | OR 0.49 (0.08, 2.73) | No multivariable analysis |
| Freitas, 2018 <sup>55</sup>                     | UU, UP            | PTB     | Born < 37 weeks     | NR                                        |                      | No multivariable analysis |
| González-Bosquet, 2006 <sup>66</sup>            | MH                | PTB     | Born < 37 weeks     | NR                                        |                      | No multivariable analysis |
| Harada, 2008 <sup>56</sup>                      | UU, UP            | PTB     | Not defined         | UU_PT<br>UP_PT                            |                      | No multivariable analysis |
| Hillier, 1988 <sup>57</sup>                     | MH                | PTB     | Born < 37 weeks     | NR                                        |                      | No multivariable analysis |
| Holst, 1994 <sup>58</sup>                       | MH                | PTB     | Born < 37 weeks     | NR                                        |                      | No multivariable analysis |
| Jones, 2009 <sup>10</sup>                       | MH, UU, UP        | PTB     | Born < 37 weeks     | NR                                        |                      | No multivariable analysis |
|                                                 |                   | PROM    | †                   |                                           |                      |                           |
| Kacerovsky, 2009 <sup>68</sup>                  | MH                | PROM    | †                   | NR                                        |                      | No multivariable analysis |
| Kumar, 2006 <sup>69</sup>                       | MH                | PTB     | Born < 37 weeks     |                                           |                      | No multivariable analysis |

## ONLINE SUPPLEMENTAL FILE

| First author, publication year, study reference | Organism reported | Outcome     | Definition Provided            | OR/ RR (95% CI) reported by study authors |                      |                                                                                      |
|-------------------------------------------------|-------------------|-------------|--------------------------------|-------------------------------------------|----------------------|--------------------------------------------------------------------------------------|
|                                                 |                   |             |                                | Organism_outcome                          | Unadjusted, OR       | Adjusted, aOR                                                                        |
| McDonald, 1992 <sup>59</sup>                    | MH                | PTB         | Born < 37 weeks                | MH_PTB                                    | OR 1.7 (0.9, 3.5)    | aOR 1.1 (0.5, 2.5)                                                                   |
|                                                 |                   | PROM        | Not defined                    | MH_PROM                                   | OR 1.5 (0.5, 4.3)    | aOR 1.1 (0.3, 3.7)<br>Adjusted for 'confounding demographic and obstetric variables' |
| Mitsunari, 2005 <sup>60</sup>                   | UU, UP            | PTB         | Not defined                    | UU_PTB<br>UP_PTB                          |                      | No multivariable analysis                                                            |
| Montenegro, 2019 <sup>70</sup>                  | MH                | PTB<br>PROM | Born < 37 weeks<br>Not defined | NR                                        |                      | No multivariable analysis                                                            |
| Munday, 1984 <sup>61</sup>                      | MH                | SA          | Not defined                    | NR                                        |                      | No multivariable analysis                                                            |
| Oliveira, 2020 <sup>7</sup>                     | MH<br>UU<br>UP    | SA          | *                              | MH_SA                                     | OR 0.08 (0.2, 3.17)  | No multivariable analysis                                                            |
|                                                 |                   |             |                                | UU_SA                                     | OR 2.21 (0.6, 8.22)  |                                                                                      |
|                                                 |                   |             |                                | UP_SA                                     | OR 1.74 (0.61, 4.93) |                                                                                      |
| Payne, 2014 <sup>62</sup>                       | UP                | PTB         | Born < 37 weeks                |                                           |                      | NR                                                                                   |
| Toth, 1992 <sup>63</sup>                        | MH                | PTB         | Born < 37 weeks                | NR                                        |                      | No multivariable analysis                                                            |
| Yoon, 2001 <sup>64</sup>                        | UU                | PTB         | Born < 37 weeks                | NR                                        |                      | No multivariable analysis                                                            |
|                                                 |                   | PROM        | Not defined                    |                                           |                      |                                                                                      |

LBW: low birth weight defined as birth weight <2.5kg; NAAT, nucleic acid amplification tests; NR, not reported; MH, *M. hominis*; PND, perinatal death; PROM, premature rupture of membrane; PTB, preterm birth; SA: spontaneous abortion; UP, *U. parvum*; UU, *U. urealyticum*.

Study reference is the reference number cited in the main manuscript.

\*SA defined as pregnancy loss at <20 weeks gestation or as defined by author;

†PROM defined as rupture of membrane before 37 completed weeks or as defined by author;

‡ Perinatal death, defined as birth after 20 weeks gestation (stillbirth) or death within 28 days after birth (neonatal death) unless otherwise defined by the study authors.

## ONLINE SUPPLEMENTAL FILE

Table S2.3 Descriptive tables: cross-sectional studies (n=5), in alphabetical order

| First author, publication year, study reference* | Organism reported | Total enrolled | Outcome        | Definition Provided             | OR/ RR (95% CI) reported by study authors |                |                           |
|--------------------------------------------------|-------------------|----------------|----------------|---------------------------------|-------------------------------------------|----------------|---------------------------|
|                                                  |                   |                |                |                                 | Organism_ outcome                         | Unadjusted, OR | Adjusted, aOR             |
| Grattard, 1995 <sup>71</sup>                     | MH                | 208            | PTB, PROM, LBW | Born < 37 weeks<br>†<br>< 2.5kg | NR                                        |                | No multivariable analysis |
| Kundsinn, 1984 <sup>72</sup>                     | MH                | 801            | PND            | ‡                               | NR                                        |                | No multivariable analysis |
| McCormack, 1975 <sup>73</sup>                    | MH                | 327            | LBW, PND       | < 2.5kg<br>Not defined          | NR                                        |                | No multivariable analysis |
| Nasution, 2007 <sup>75</sup>                     | MH                | 120            | PROM           | Not defined                     | NR                                        |                | No multivariable analysis |
| Sweeney, 2016 <sup>74</sup>                      | UU, UP            | 535            | PTB            | Born < 37 weeks                 | NR                                        |                | No multivariable analysis |

LBW: low birth weight defined as birth weight <2.5kg; NAAT, nucleic acid amplification tests; NR, not reported; MH, *M. hominis*; PND, perinatal death; PROM, premature rupture of membrane; PTB, preterm birth; SA: spontaneous abortion; UP, *U. parvum*; UU, *U. urealyticum*.

\* Study reference is the reference number cited in the main manuscript;

†PROM defined as rupture of membrane before 37 completed weeks or as defined by author;

‡ Perinatal death, defined as birth after 20 weeks gestation (stillbirth) or death within 28 days after birth (neonatal death) unless otherwise defined by the study authors.

## ONLINE SUPPLEMENTAL FILE

Table S3.1 Summary description of studies reporting *M. hominis* (n=42) in alphabetical order, by country-level income status

| First author, publication year, country, study reference | Study design    | Gestational age at assessment | Sample size for outcome of interest                                                                         |                   |                  |                  |                  | NICE checklist criteria fulfilled* |
|----------------------------------------------------------|-----------------|-------------------------------|-------------------------------------------------------------------------------------------------------------|-------------------|------------------|------------------|------------------|------------------------------------|
|                                                          |                 |                               | Number of adverse outcomes in women with <i>M. hominis</i> / total number of women with adverse outcome (%) |                   |                  |                  |                  |                                    |
|                                                          |                 |                               | PTB                                                                                                         | LBW               | PROM             | SA               | PND              |                                    |
| <b>High-income country†</b>                              |                 |                               |                                                                                                             |                   |                  |                  |                  |                                    |
| Agger, 2014, <sup>1</sup> USA                            | Cohort          | NR                            | 676<br>14/54 (26)                                                                                           |                   |                  |                  |                  | +/+                                |
| Braun, 1971, <sup>35</sup> USA                           | Cohort          | LMP                           |                                                                                                             | 485<br>24/42 (57) |                  | 491<br>3/6 (50)  | 491<br>7/10 (70) | +/-                                |
| Cassell, 1983, <sup>32</sup> USA                         | Case-control    | US                            | 61<br>1/10 (10)                                                                                             |                   |                  |                  | 61<br>0/3 (0)    | +/-                                |
| Donders, 2009, <sup>36</sup> Belgium                     | Cohort          | US                            | 744<br>5/50 (10)                                                                                            |                   |                  | 759<br>1/15 (7)  |                  | +/+                                |
| Embree, 1980, <sup>54</sup> Canada                       | Case-control    | LMP, NN assessment            |                                                                                                             |                   |                  | 157<br>3/10 (30) | 157<br>0/39 (0)  | -/-                                |
| Grattard, 1995, <sup>71</sup> France                     | Cross-sectional | NR                            | 193<br>3/8 (38)                                                                                             | 202<br>2/8 (25)   | 208<br>4/36 (11) |                  |                  | -/+                                |
| Harrison, 1983, <sup>39</sup> USA                        | Cohort          | NR                            |                                                                                                             |                   |                  | 348<br>4/22 (18) |                  | -/-                                |
| Hillier, 1988, <sup>57</sup> USA                         | Case-control    | US, FH, LMP                   | 112<br>3/38 (8)                                                                                             |                   |                  |                  |                  | +/+                                |
| Hillier, 1995, <sup>33</sup> USA                         | Cohort          | LMP                           | 9105<br>161/423 (38)                                                                                        |                   |                  |                  |                  |                                    |
| Holst, 1994, <sup>58</sup> Sweden                        | Case-control    | US, LMP                       | 87<br>10/22 (45)                                                                                            |                   |                  |                  |                  | ++/+                               |
| Jones, 2009, <sup>10</sup> United Kingdom                | Case-control    | NR                            | 74<br>2/53 (4)                                                                                              |                   | 74<br>2/26 (8)   |                  |                  | -/-                                |
| Kataoka, 2006, <sup>40</sup> Japan                       | Cohort          | US, LMP                       | 872<br>4/16 (25)                                                                                            |                   | 872<br>1/7 (14)  | 877<br>0/5 (0)   | 872<br>0/1 (0)   | +/+                                |

## ONLINE SUPPLEMENTAL FILE

| First author,<br>publication year,<br>country, study reference | Study design    | Gestational age<br>at assessment | Sample size for outcome of interest                                                                            |                   |                   |                  |                  | NICE checklist<br>criteria fulfilled* |
|----------------------------------------------------------------|-----------------|----------------------------------|----------------------------------------------------------------------------------------------------------------|-------------------|-------------------|------------------|------------------|---------------------------------------|
|                                                                |                 |                                  | Number of adverse outcomes in women with <i>M. hominis</i> / total number of women<br>with adverse outcome (%) |                   |                   |                  |                  |                                       |
|                                                                |                 |                                  | PTB                                                                                                            | LBW               | PROM              | SA               | PND              |                                       |
| Kundsinn, 1984, <sup>72</sup> USA                              | Cross-sectional | NR                               |                                                                                                                |                   |                   |                  | 801<br>5/29 (17) | +/-                                   |
| Kwak, 2014, <sup>50</sup> South Korea                          | Cohort          | NR                               | 112<br>13/86 (15)                                                                                              |                   |                   |                  |                  | +/+                                   |
| Lee, 2016, <sup>6</sup> South Korea                            | Cohort          | NR                               | 466<br>1/141 (<1)                                                                                              |                   | 466<br>0/187 (0)  | 466<br>0/11 (0)  |                  | -/-                                   |
| McCormack, 1975, <sup>73</sup> USA                             | Cross-sectional | NR                               |                                                                                                                | 326<br>3/42 (7)   |                   |                  | 326<br>2/6 (33)  | +/-                                   |
| McDonald, 1992, <sup>59</sup><br>Australia                     | Case-control    | LMP, US                          | 786<br>11/135 (8)                                                                                              |                   | 708<br>4/57 (8)   |                  |                  | -/-                                   |
| McDonald, 1994, <sup>42</sup><br>Australia                     | Cohort          | US, LMP                          | 337<br>7/45 (16)                                                                                               |                   |                   |                  |                  | -/-                                   |
| Menard, 2010, <sup>43</sup> France                             | Cohort          | US, LMP                          | 90<br>6/36 (17)                                                                                                |                   |                   |                  |                  | -/-                                   |
| Minkoff, 1984, <sup>44</sup> USA                               | Cohort          | NR                               | 201<br>10/18 (56)                                                                                              |                   | 188<br>21/40 (53) |                  |                  | -/-                                   |
| Munday, 1984, <sup>61</sup> United<br>Kingdom                  | Case-control    | NR                               |                                                                                                                |                   |                   | 241<br>9/76 (12) |                  | +/-                                   |
| Nguyen, 2004, <sup>45</sup><br>Switzerland                     | Cohort          | NR                               | 395<br>3/10 (30)                                                                                               |                   | 365<br>0/7 (0%)   |                  | 395<br>1/6 (17)  | +/+                                   |
| Payne, 2016, <sup>46</sup> Australia                           | Cohort          | NR                               | 187<br>2/13 (15)                                                                                               |                   |                   |                  |                  | +/+                                   |
| Payne, 2021, <sup>15</sup> Australia                           | Cohort          | NR                               | 1000<br>9/118 (8)                                                                                              |                   |                   |                  |                  | +/+                                   |
| Sperling, 1988, <sup>49</sup> USA                              | Cohort          | NR                               |                                                                                                                | 404<br>14/37 (38) |                   |                  |                  | -/-                                   |
| Toth, 1992, <sup>63</sup> United<br>Kingdom                    | Case-control    | NR                               | 80<br>3/39 (8)                                                                                                 |                   |                   |                  |                  | -/-                                   |

## ONLINE SUPPLEMENTAL FILE

| First author,<br>publication year,<br>country, study reference | Study design | Gestational age<br>at assessment | Sample size for outcome of interest<br>Number of adverse outcomes in women with <i>M. hominis</i> / total number of women<br>with adverse outcome (%) |                   |                |                   |                  | NICE checklist<br>criteria fulfilled* |
|----------------------------------------------------------------|--------------|----------------------------------|-------------------------------------------------------------------------------------------------------------------------------------------------------|-------------------|----------------|-------------------|------------------|---------------------------------------|
|                                                                |              |                                  | PTB                                                                                                                                                   | LBW               | PROM           | SA                | PND              |                                       |
| Usui, 2002, <sup>48</sup> Japan                                | Cohort       | LMP                              | 1958<br>15/342 (4)                                                                                                                                    |                   |                |                   |                  | +/-                                   |
| <b>Upper-middle income†</b>                                    |              |                                  |                                                                                                                                                       |                   |                |                   |                  |                                       |
| Berman, 1987, <sup>34</sup> Mexico                             | Cohort       | NR                               |                                                                                                                                                       | 796<br>28/48 (58) |                |                   |                  | -/+                                   |
| Chua, 1999, <sup>67</sup> Malaysia                             | Case-control | LMP, NN<br>assessment            | 120<br>9/60 (15)                                                                                                                                      |                   |                |                   |                  | +/+                                   |
| Farhadifar, 2016, <sup>11</sup> Iran                           | Case-control | US/LMP                           |                                                                                                                                                       |                   |                | 218<br>2/109 (2)  |                  | +/+                                   |
| Govender, 2009, <sup>38</sup> South<br>Africa                  | Cohort       | NR                               | 199<br>11/20 (55)                                                                                                                                     |                   |                |                   |                  | -/-                                   |
| Luton, 1994, <sup>8</sup> Gabon                                | Cohort       | US, LMP                          | 181<br>11/20 (55)                                                                                                                                     | 181<br>8/13 (62)  |                |                   | 198<br>5/10 (50) | -/-                                   |
| Montenegro, <sup>70</sup> 2019,<br>Colombia                    | Case-control | NR                               | 211<br>1/84 (1)                                                                                                                                       |                   | 211<br>0/3 (0) |                   |                  | +/+                                   |
| Odendaal, 2002, <sup>51</sup> South<br>Africa                  | Cohort       | US                               | 395<br>33/119 (28)                                                                                                                                    |                   |                | 395<br>1/7 (14)   | 395<br>2/4 (50)  | +/-                                   |
| Oliveria, 2020, <sup>7</sup> Brazil                            | Case-control | NR                               |                                                                                                                                                       |                   |                | 109<br>11/89 (12) |                  | +/+                                   |
| <b>Lower-middle/low income†</b>                                |              |                                  |                                                                                                                                                       |                   |                |                   |                  |                                       |
| Schwab, 2015, <sup>53</sup> Indonesia                          | Cohort       | LMP                              | 62<br>2/23 (9)                                                                                                                                        |                   |                |                   |                  | -/-                                   |
| Kumar, 2006, <sup>69</sup> India                               | Case-control | NR                               | 120<br>4/60 (7)                                                                                                                                       |                   |                |                   |                  | +/+                                   |
| <b>Country not reported</b>                                    |              |                                  |                                                                                                                                                       |                   |                |                   |                  |                                       |
| González Bosquet, 2006 <sup>66</sup>                           | Case-control | US                               | 120                                                                                                                                                   |                   |                |                   |                  | +/+                                   |

## ONLINE SUPPLEMENTAL FILE

| First author, publication year, country, study reference | Study design    | Gestational age at assessment | Sample size for outcome of interest                                                                         |     |             |    |     | NICE checklist criteria fulfilled* |
|----------------------------------------------------------|-----------------|-------------------------------|-------------------------------------------------------------------------------------------------------------|-----|-------------|----|-----|------------------------------------|
|                                                          |                 |                               | Number of adverse outcomes in women with <i>M. hominis</i> / total number of women with adverse outcome (%) |     |             |    |     |                                    |
|                                                          |                 |                               | PTB                                                                                                         | LBW | PROM        | SA | PND |                                    |
|                                                          |                 |                               | 0/70 (0)                                                                                                    |     |             |    |     |                                    |
| Daskalakis, 2009 <sup>65</sup>                           | Case-control    | US, LMP                       | 37                                                                                                          |     |             |    |     | +/+                                |
|                                                          |                 |                               | 8/25 (32)                                                                                                   |     |             |    |     |                                    |
| Kacerovsky, 2009 <sup>68</sup>                           | Case-control    | NR                            |                                                                                                             |     | 450         |    |     | -/-                                |
|                                                          |                 |                               |                                                                                                             |     | 63/225 (28) |    |     |                                    |
| Nasution, 2007 <sup>75</sup>                             | Cross-sectional | NR                            |                                                                                                             |     | 80          |    |     | -/-                                |
|                                                          |                 |                               |                                                                                                             |     | 4/40 (10)   |    |     |                                    |
| Perni, 2004 <sup>52</sup>                                | Cohort          | NR                            | 179                                                                                                         |     | 179         |    |     | +/+                                |
|                                                          |                 |                               | 0/10 (0)                                                                                                    |     | 2/5 (40)    |    |     |                                    |

MH, *Mycoplasma hominis*; UU, *Ureaplasma urealyticum*; UP, *Ureaplasma parvum*; NR, not reported; USA, United States of America.

LBW: low birth weight, defined as birth weight <2.5kg ; PTB: preterm birth, defined as delivery before 37weeks gestation; PROM: premature rupture of membranes, - defined as clinically confirmed rupture of membrane before 37weeks gestation; PND, perinatal death, defined as stillbirth (death after 20/40 gestation) or neonatal death (death <28 day since birth), unless otherwise defined by the study authors; SA: spontaneous abortion- defined as pregnancy loss at <20/40 or as defined by author.

Study reference is the reference number cited in the main manuscript.

\* UK National Institute of Health and Care Excellence (NICE) checklist, summary of criteria for internal/external validity: +/+ Some checklist criteria fulfilled; -/-Few or no checklist criteria fulfilled. Detailed assessment reported by study design in Tables S6.1-S6.3.

† High-income (\$12,376 or more); Upper-middle income (\$3,996 to \$1,2375); Lower-middle-income (\$1,025 to \$3,995); Low-income (\$1,025 or less) (Source: World Bank, Gross national income per capita, 2019-2020 <https://datatopics.worldbank.org/world-development-indicators/the-world-by-income-and-region.html>).



## ONLINE SUPPLEMENTAL FILE

Table S3.2 Summary description of studies reporting *U. urealyticum* (n=18) in alphabetical order, by country-level income status

| First author,<br>publication year,<br>country, study<br>reference | Study design | Gestational age<br>at assessment | Sample size for outcome of interest                                                                                |                 |                |                 |                | NICE checklist<br>criteria fulfilled* |
|-------------------------------------------------------------------|--------------|----------------------------------|--------------------------------------------------------------------------------------------------------------------|-----------------|----------------|-----------------|----------------|---------------------------------------|
|                                                                   |              |                                  | Number of adverse outcomes in women with <i>U. urealyticum</i> / total number of women with<br>adverse outcome (%) |                 |                |                 |                |                                       |
|                                                                   |              |                                  | PTB                                                                                                                | LBW             | PROM           | SA              | PND            |                                       |
| <b>High-income country†</b>                                       |              |                                  |                                                                                                                    |                 |                |                 |                |                                       |
| Agger, 2014, <sup>1</sup> USA                                     | Cohort       | NR                               | 676<br>4/54 (11)                                                                                                   |                 |                |                 |                | +/+                                   |
| Freitas, 2018, <sup>55</sup><br>Canada                            | Case-control | NR                               | 216<br>0/46 (0)                                                                                                    |                 |                |                 |                | +/+                                   |
| Harada, 2008, <sup>56</sup><br>Japan                              | Case-control | NR                               | 145<br>0/45 (0)                                                                                                    |                 |                |                 |                | +/+                                   |
| Jones, 2009, <sup>10</sup><br>United Kingdom                      | Case-control | NR                               | 74<br>2/53 (4)                                                                                                     |                 | 74<br>2/26 (8) |                 |                | -/-                                   |
| Kataoka, 2006, <sup>40</sup><br>Japan                             | Cohort       | US, LMP                          | 872<br>0/16 (0)                                                                                                    |                 | 872<br>0/7 (0) | 877<br>1/5 (20) | 872<br>0/1 (0) | +/+                                   |
| Koucky, 2016, <sup>41</sup><br>Czech Republic                     | Cohort       | US, LMP                          | 63<br>17/29 (59)                                                                                                   |                 |                |                 |                | +/+                                   |
| Mitsunari, 2005, <sup>60</sup><br>Japan                           | Case-control | NR                               | 82<br>2/21 (10)                                                                                                    |                 |                |                 |                | +/+                                   |
| Payne, 2016, <sup>46</sup><br>Australia                           | Cohort       | NR                               | 187<br>2/13 (15)                                                                                                   |                 |                |                 |                | +/+                                   |
| Payne, 2021, <sup>15</sup><br>Australia                           | Cohort       | NR                               | 1000<br>14/118 (12)                                                                                                |                 |                |                 |                | +/+                                   |
| Peretz, 2020, <sup>12</sup><br>Israel                             | Cohort       | NR                               | 214<br>3/5 (60)                                                                                                    | 214<br>1/3 (33) |                |                 |                | -/-                                   |

## ONLINE SUPPLEMENTAL FILE

| First author,<br>publication year,<br>country, study<br>reference | Study design        | Gestational age<br>at assessment | Sample size for outcome of interest                                                                                |     |                            |                    |     | NICE checklist<br>criteria fulfilled* |
|-------------------------------------------------------------------|---------------------|----------------------------------|--------------------------------------------------------------------------------------------------------------------|-----|----------------------------|--------------------|-----|---------------------------------------|
|                                                                   |                     |                                  | Number of adverse outcomes in women with <i>U. urealyticum</i> / total number of women with<br>adverse outcome (%) |     |                            |                    |     |                                       |
|                                                                   |                     |                                  | PTB                                                                                                                | LBW | PROM                       | SA                 | PND |                                       |
| Rittenschöber-<br>Böhm, 2018, <sup>47</sup><br>Austria            | Cohort              | US                               | 2183<br>19/146 (13)                                                                                                |     |                            |                    |     | +/+                                   |
| Sweeney, 2016, <sup>74</sup><br>USA                               | Cross-<br>sectional | NR                               | 535<br>6/443 (1)                                                                                                   |     |                            |                    |     | +/-                                   |
| Yoon, 2001, <sup>64</sup> South<br>Korea                          | Case-control        | NR                               | 114<br>3/19 (16)                                                                                                   |     | Missing data<br>2/9 (22)** |                    |     | +/+                                   |
| <b>Upper-middle income†</b>                                       |                     |                                  |                                                                                                                    |     |                            |                    |     |                                       |
| Ahmadi, 2014, <sup>9</sup><br>Iran                                | Cohort              | US, LMP                          |                                                                                                                    |     |                            | 218<br>18/109 (17) |     | +/+                                   |
| Govender, 2009, <sup>38</sup><br>South Africa                     | Cohort              | NR                               | 199<br>5/20 (25)                                                                                                   |     |                            |                    |     | -/-                                   |
| Oliveira, 2020, <sup>7</sup><br>Brazil                            | Case-control        | NR                               |                                                                                                                    |     |                            | 109<br>25/89 (28)  |     | +/+                                   |
| <b>Country not reported</b>                                       |                     |                                  |                                                                                                                    |     |                            |                    |     |                                       |
| Gerber, 2003, <sup>37</sup>                                       | Cohort              | NR                               | 254<br>9/10 (90)                                                                                                   |     | 254<br>6/7 (86)            |                    |     | +/-                                   |
| Perni, 2004 <sup>52</sup>                                         | Cohort              | Cohort                           | 172<br>0/10 (0)                                                                                                    |     | 172<br>3/5 (60)            |                    |     | +/+                                   |

MH, *Mycoplasma hominis*; UU, *Ureaplasma urealyticum*; UP, *Ureaplasma parvum*; NR, not reported; USA, United States of America.

LBW: low birth weight, defined as birth weight <2.5kg; PTB: preterm birth, defined as delivery before 37weeks gestation; PROM: premature rupture of membranes, - defined as clinically confirmed rupture of membrane before 37weeks gestation; PND, perinatal death, defined as stillbirth (death after 20/40 gestation) or neonatal death (death <28 day since birth), unless otherwise defined by the study authors; SA: spontaneous abortion- defined as pregnancy loss at <20/40 or as defined by author.

Study reference is the reference number cited in the main manuscript.

**ONLINE SUPPLEMENTAL FILE**

\* UK National Institute of Health and Care Excellence (NICE) checklist, summary of criteria for internal/external validity: +/- Some checklist criteria fulfilled; -/-Few or no checklist criteria fulfilled. Detailed assessment reported by study design in Tables S6.1-S6.3.

† High-income (\$12,376 or more); Upper-middle income (\$3,996 to \$1,2375); Lower-middle-income (\$1,025 to \$3,995); Low-income (\$1,025 or less) (Source: World Bank, Gross national income per capita, 2019-2020 <https://datatopics.worldbank.org/world-development-indicators/the-world-by-income-and-region.html>).

## ONLINE SUPPLEMENTAL FILE

Table S3.3 Summary description of studies reporting *U. parvum* (n=14) in alphabetical order

| First author, publication year, country, study reference | Study design | Gestational age at assessment | Sample size for outcome of interest                                                                        |     |                  |                   |                  | NICE checklist criteria fulfilled* |
|----------------------------------------------------------|--------------|-------------------------------|------------------------------------------------------------------------------------------------------------|-----|------------------|-------------------|------------------|------------------------------------|
|                                                          |              |                               | Number of adverse outcomes in women with <i>U. parvum</i> / total number of women with adverse outcome (%) |     |                  |                   |                  |                                    |
|                                                          |              |                               | PTB                                                                                                        | LBW | PROM             | SA                | PND              |                                    |
| <b>Upper-middle and high-income country†</b>             |              |                               |                                                                                                            |     |                  |                   |                  |                                    |
| Agger, 2014, <sup>1</sup><br>USA                         | Cohort       | NR                            | 676<br>29/54 (54)                                                                                          |     |                  |                   |                  | +/+                                |
| Freitas, 2018, <sup>55</sup><br>Canada                   | Case-control | NR                            | 216<br>14/46 (30)                                                                                          |     |                  |                   |                  | +/-                                |
| Govender, 2009, <sup>38</sup><br>South Africa            | Cohort       | NR                            | 199<br>10/20 (50)                                                                                          |     |                  |                   |                  | -/-                                |
| Harada, 2008, <sup>56</sup><br>Japan                     | Case-control | NR                            | 145<br>23/45 (51)                                                                                          |     |                  |                   |                  | +/+                                |
| Jones, 2009, <sup>10</sup><br>United Kingdom             | Case-control | NR                            | 74<br>19/53 (36)                                                                                           |     | 74<br>11/26 (42) |                   |                  | -/-                                |
| Kataoka, 2006, <sup>40</sup><br>Japan                    | Cohort       | US, LMP                       | 872<br>4/16 (25)                                                                                           |     | 872<br>6/7 (86)  | 877<br>3/5 (60)   | 872<br>1/1 (100) | +/+                                |
| Mitsunari, 2005, <sup>60</sup><br>Japan                  | Case-control | NR                            | 82<br>16/21 (76)                                                                                           |     |                  |                   |                  | +/+                                |
| Oliveira, 2020, <sup>7</sup><br>Brazil                   | Case-control | NR                            |                                                                                                            |     |                  | 109<br>68/89 (76) |                  | +/+                                |
| Payne, 2014, <sup>62</sup><br>China & Australia          | Case-control | NR                            | 972<br>2/115 (2)                                                                                           |     |                  |                   |                  | +/+                                |
| Payne, 2016, <sup>46</sup><br>Australia                  | Cohort       | NR                            | 187<br>10/13 (77)                                                                                          |     |                  |                   |                  | +/+                                |

**ONLINE SUPPLEMENTAL FILE**

|                                                    |                 |    |                      |                 |     |
|----------------------------------------------------|-----------------|----|----------------------|-----------------|-----|
| Payne, 2021, <sup>15</sup> Australia               | Cohort          | NR | 1000<br>56/118 (48)  |                 | +/+ |
| Peretz, 2020, <sup>12</sup><br>Israel              | Cohort          | NR | 214<br>1/5 (20)      | 214<br>1/3 (33) | -/- |
| Rittenschober-Böhm,<br>2018, <sup>47</sup> Austria | Cohort          | US | 3316<br>140/267 (52) |                 | +/+ |
| Sweeney, 2016, <sup>74</sup><br>USA                | Cross-sectional | NR | 535<br>27/443 (4)    |                 | +/- |

MH, *Mycoplasma hominis*; UU, *Ureaplasma urealyticum*; UP, *Ureaplasma parvum*; NR, not reported; UK, United Kingdom; USA, United States of America.

LBW: low birth weight, defined as birth weight <2.5kg ; PTB: preterm birth, defined as delivery before 37weeks gestation; PROM: premature rupture of membranes, - defined as clinically confirmed rupture of membrane before 37weeks gestation; PND, perinatal death, defined as stillbirth (death after 20/40 gestation) or neonatal death (death <28 day since birth), unless otherwise defined by the study authors; SA: spontaneous abortion- defined as pregnancy loss at <20/40 or as defined by author.

Study reference is the reference number cited in the main manuscript.

\* UK National Institute of Health and Care Excellence (NICE) checklist, summary of criteria for internal/external validity: +/+ Some checklist criteria fulfilled; -/-Few or no checklist criteria fulfilled. Detailed assessment reported by study design in Tables S6.1-S6.3.

† High-income (\$12,376 or more); Upper-middle income (\$3,996 to \$1,2375) (Source: World Bank, Gross national income per capita, 2019-2020 <https://datatopics.worldbank.org/world-development-indicators/the-world-by-income-and-region.html>).

**ONLINE SUPPLEMENTAL FILE****Table S4.1** Study setting and socio-demographics, cohort studies (n=26), in alphabetical order

| First author, publication year, study reference* | Study location | Study setting   | Urban/ rural location | Mean†/ median age years (range) | Ethnicity | Other infections included/(excluded) | Smokers included (%) | Multiple pregnancies |
|--------------------------------------------------|----------------|-----------------|-----------------------|---------------------------------|-----------|--------------------------------------|----------------------|----------------------|
| Agger, 2014 <sup>1</sup>                         | USA            | NR/unclear;     | Mixed                 | NR                              | Mixed     | CT, NG, MG, syphilis, HPV, herpes,   | NR                   | Yes                  |
| Berman, 1987 <sup>34</sup>                       | Mexico         | Health facility | NR/ unclear           | NR                              | NR        | CT                                   | NR                   | No                   |
| Braun, 1971 <sup>35</sup>                        | USA            | Health facility | Urban                 | NR                              | Mixed     | NR                                   | NR                   | NR                   |
| Donders, 2009 <sup>36</sup>                      | Belgium        | Health facility | Urban                 | 29†                             | Mixed     | BV (CT, NG, TV, syphilis)            | 120/761 (15.8%)      | No                   |
| Gerber, 2003 <sup>37</sup>                       | NR             | Health facility | NR/ unclear           | (19 – 42)                       | White     | NR                                   | NR                   | Yes                  |
| Govender, 2009 <sup>38</sup>                     | South Africa   | Health facility | Urban                 | NA                              | NR        | CT, MG, HIV                          | NR                   | NR                   |
| Harrison, 1983 <sup>39</sup>                     | USA            | Health facility | Urban                 | NR                              | Mixed     | CT                                   | NR                   | Yes                  |
| Hillier, 1995 <sup>33</sup>                      | USA            | Health facility | Urban                 | NR                              | Mixed     | CT, NG, TV, BV                       | Yes but number/% NR  | No                   |
| Kataoka, 2006 <sup>40</sup>                      | Japan          | Health facility | Urban                 | 28.9†                           | NR        | CT, NG, MG                           | NR                   | No                   |
| Koucky, 2016 <sup>41</sup>                       | Czech Republic | Health facility | Urban                 | 31                              | NR        | NR                                   | NR                   | No                   |
| Kwak, 2014 <sup>50</sup>                         | South Korea    | Health facility | Urban                 | 30.7                            | NR        | NR                                   | NR                   | No                   |
| Lee, 2016 <sup>6</sup>                           | South Korea    | Health facility | Urban                 | 31 (15 - 47)                    | NR        | NR                                   | NR                   | NR                   |

## ONLINE SUPPLEMENTAL FILE

| First author, publication year, study reference* | Study location | Study setting   | Urban/ rural location | Mean†/ median age years (range) | Ethnicity | Other infections included/(excluded)  | Smokers included (%) | Multiple pregnancies |
|--------------------------------------------------|----------------|-----------------|-----------------------|---------------------------------|-----------|---------------------------------------|----------------------|----------------------|
| Luton, 1994 <sup>8</sup>                         | Gabon          | Health facility | NR/ unclear           | NR                              | NR        | CT, NG, TV, syphilis, HIV             | NR                   | No                   |
| McDonald, 1994 <sup>42</sup>                     | Australia      | Health facility | NR                    | NR                              | NR        | CT, TV                                | NR                   | NR                   |
| Menard, 2010 <sup>43</sup>                       | France         | Health facility | Urban                 | NR                              | NR        | BV                                    | NR                   | No                   |
| Minkoff, 1984 <sup>44</sup>                      | USA            | Health facility | NR                    | 27† (17 - 39)                   | Mixed     | CT, TV, HSV, nonspecific vaginitis/BV | NR                   | Yes                  |
| Nguyen, 2004 <sup>45</sup>                       | Switzerland    | Health facility | Urban                 | 19 - 42                         | NR        | NR                                    | NR                   | No                   |
| Odendaal, 2002 <sup>51</sup>                     | South Africa   | Health facility | Urban                 | NR                              | NR        | CT, NG, BV                            | 161/395 (40.8%)      | No                   |
| Payne, 2016 <sup>46</sup>                        | Australia      | Health facility | Urban                 | 30 (18 - 43)                    | Mixed     | NR                                    | 21/191 (11%)         | No                   |
| Payne, 2021 <sup>15</sup>                        | Australia      | Health facility | Urban                 | NR                              | Mixed     | MG, (HIV)                             | 135/1000 (13.5%)     | No                   |
| Peretz, 2020 <sup>12</sup>                       | Israel         | Health facility | Urban                 | 29.8†                           | Mixed     | MG                                    | NR                   | Yes                  |
| Perni, 2004 <sup>52</sup>                        | NR             | Health facility | NR/ unclear           | 18 - 44                         | Mixed     | NR                                    | NR                   | No                   |
| Rittenschober-Böhm, 2018 <sup>47</sup>           | Austria        | Health facility | Urban                 | 30.3†                           | NR        | BV                                    | 670/3643 (18.4%)     | No                   |

## ONLINE SUPPLEMENTAL FILE

| First author, publication year, study reference* | Study location | Study setting   | Urban/ rural location | Mean†/ median age years (range) | Ethnicity | Other infections included/(excluded) | Smokers included (%) | Multiple pregnancies |
|--------------------------------------------------|----------------|-----------------|-----------------------|---------------------------------|-----------|--------------------------------------|----------------------|----------------------|
| Schwab, 2015 <sup>53</sup>                       | Indonesia      | Health facility | Urban                 | 26.6† (17- 42)                  | NR        | CT, NG, BV                           | NR                   | NR                   |
| Sperling, 1988 <sup>49</sup>                     | USA            | Health facility | Urban                 | NR                              | Mixed     | NR                                   | NR                   | NR                   |
| Usui, 2002 <sup>48</sup>                         | Japan          | Health facility | Urban                 | NR                              | Asian     | CT                                   | NR                   | No                   |

BV, bacterial vaginosis; CT, *Chlamydia trachomatis*; HIV, human immunodeficiency virus; HPV, human papilloma virus; HSV, herpes simplex virus; MG, *Mycoplasma genitalium*; NG, *Neisseria gonorrhoeae*; NR, not reported; No, did not include multiple pregnancy; Yes, included multiple pregnancies; TV, *Trichomonas vaginalis*; USA, United States of America.

NR/ unclear, it was not clearly reported where the study setting was located.

\* Study reference is the reference number cited in the main manuscript

†Reported mean age.



## ONLINE SUPPLEMENTAL FILE

Table S4.2 Study setting and socio-demographics, case-control studies (n=22), in alphabetical order

| First author, Publication year, study reference* | Study location | Study setting   | Urban /rural location | Mean†/ median age years (range) | Ethnicity    | Other infections included/(excluded)                  | Smokers included (%) | Multiple pregnancies |
|--------------------------------------------------|----------------|-----------------|-----------------------|---------------------------------|--------------|-------------------------------------------------------|----------------------|----------------------|
| Ahmadi, 2014 <sup>9</sup>                        | Iran           | Health facility | Urban                 | 19 - 43                         | NR           | NR                                                    | 3/218 (1.4)          | NR                   |
| Cassell, 1983 <sup>32</sup>                      | USA            | Health facility | Urban                 | NR                              | White, Black | NR                                                    | NR                   | NR                   |
| Chua, 1999 <sup>67</sup>                         | Malaysia       | Health facility | Urban                 | NR                              | NR           | NR                                                    | NR                   | No                   |
| Daskalakis, 2009, <sup>65</sup>                  | NR             | Health facility | Urban                 | NR                              | NR           | NR                                                    | 36/144 (25)          | No                   |
| Embree, 1980 <sup>54</sup>                       | Canada         | Health facility | Urban                 | 14-45                           | NR           | NR                                                    | NR                   | Yes                  |
| Farhadifar, 2017 <sup>11</sup>                   | Iran           | Health facility | Urban                 | 25 (19 - 43)                    | NR           | NR                                                    | NR                   | NR                   |
| Freitas, 2018 <sup>55</sup>                      | Canada         | Health facility | Urban                 | 33 <sup>†</sup> (21 - 45)       | Mixed        | NR                                                    | 4/216 (2.3%)         | NR                   |
| González- Bosquet, 2006 <sup>66</sup>            | NR             | Health facility | NR/ unclear           | NR                              | NR           | TV, BV-associated bacteria, CA, <i>E. coli</i> , GBS, | NR                   | No                   |
| Harada, 2008 <sup>56</sup>                       | Japan          | Health facility | Urban                 | NR                              | NR           | NR                                                    | NR                   | No                   |
| Hillier, 1988 <sup>57</sup>                      | USA            | Health facility | Urban                 | NR                              | NR           | CT, TV, BV                                            | NR                   | No                   |
| Holst, 1994 <sup>58</sup>                        | Sweden         | Health facility | Urban                 | NR                              | NR           | CT, NG, BV                                            | 20/49 (40.8)         | No                   |
| Jones, 2009 <sup>10</sup>                        | UK             | Health facility | Urban                 | NR                              | NR           | NR                                                    | NR                   | No                   |
| Kacerovsky, 2009 <sup>68</sup>                   | NR             | Health facility | NR/ unclear           | 26 (19-38)                      | NR           | NR                                                    | NR                   | No                   |
| Kumar, 2006 <sup>69</sup>                        | India          | Health facility | Urban                 | NR                              | NR           | BV                                                    | NR                   | NR                   |

## ONLINE SUPPLEMENTAL FILE

| First author, Publication year, study reference* | Study location   | Study setting   | Urban /rural location | Mean†/ median age years (range) | Ethnicity | Other infections included/(excluded) | Smokers included (%) | Multiple pregnancies |
|--------------------------------------------------|------------------|-----------------|-----------------------|---------------------------------|-----------|--------------------------------------|----------------------|----------------------|
| McDonald, 1992 <sup>59</sup>                     | Australia        | Health facility | Urban                 | NR                              | NR        | NR                                   | 839/ 2190 (39.8%)    | NR                   |
| Mitsunari, 2005 <sup>60</sup>                    | Japan            | Health facility | Urban                 | NR                              | Asian     | (CT)                                 | NR                   | No                   |
| Montenegro, 2019 <sup>70</sup>                   | Colombia         | Health facility | Urban                 | NR                              | NR        | NR                                   | NR                   | NR                   |
| Munday, 1984 <sup>61</sup>                       | UK               | Health facility | Urban                 | NR                              | Mixed     | CT                                   | NR                   | NR                   |
| Oliveira, 2020 <sup>7</sup>                      | Brazil           | Health facility | Urban                 | 27.3                            | Mixed     | NG, MG                               | 5/109 (4.6)          | NR                   |
| Payne, 2014 <sup>62</sup>                        | China, Australia | Health facility | NR/unclear            | 17- 49                          | Mixed     | NR                                   | 69/972 (7.1%)        | No                   |
| Toth, 1992 <sup>63</sup>                         | UK               | Health facility | Urban                 | NR                              | NR        | CT, TV                               | NR                   | NR                   |
| Yoon, 2001 <sup>64</sup>                         | South Korea      | Health facility | Urban                 | NR                              | NR        | NR                                   | NR                   | No                   |

BV, bacterial vaginosis; CA, *Candida albicans*; CT, *Chlamydia trachomatis*; HIV, human immunodeficiency virus; NG, *Neisseria gonorrhoeae*; NR, not reported; No, did not include multiple pregnancy; Yes, included multiple pregnancies; TV, *Trichomonas vaginalis*; UK, United Kingdom; USA, United States of America.

\* Study reference is the reference number cited in the main manuscript;

† Reported mean age.

## ONLINE SUPPLEMENTAL FILE

Table S4.3 Study setting and socio-demographics, cross-sectional studies (n=5), in alphabetical order

| First author, Publication year, study reference* | Study location | Study setting   | Urban /rural location | Mean†/ median age years (range) | Ethnicity | Other infections included/(excluded) | Smokers included (%) | Multiple pregnancies |
|--------------------------------------------------|----------------|-----------------|-----------------------|---------------------------------|-----------|--------------------------------------|----------------------|----------------------|
| Grattard, 1995 <sup>71</sup>                     | France         | Health facility | Urban                 | NR                              | NR        | NR                                   | NR                   | NR                   |
| Kundsin, 1984 <sup>72</sup>                      | USA            | Health facility | Urban                 | NR                              | Mixed     | NR                                   | 105/801 (31.4%)      | Yes                  |
| McCormack, 1975 <sup>73</sup>                    | USA            | Health facility | Urban                 | 23.6 <sup>†</sup>               | Mixed     | NR                                   | NR                   | Yes                  |
| Nasution, 2007 <sup>75</sup>                     | NR             | Health facility | NR/ unclear           | 24 - 38                         | Asian     | CT, NG                               | NR                   | NR                   |
| Sweeney, 2016 <sup>74</sup>                      | USA            | Health facility | Urban                 | NR                              | Mixed     | NR                                   | NR                   | Yes                  |

BV, bacterial vaginosis; CT, *Chlamydia trachomatis*; HIV, human immunodeficiency virus; NG, *Neisseria gonorrhoeae*; No, did not include multiple pregnancy; Yes, included multiple pregnancies; NR, not reported; TV, *Trichomonas vaginalis*; UK, United Kingdom; USA, United States of America

\* Study reference is the reference number cited in the main manuscript

† Reported mean age

## ONLINE SUPPLEMENTAL FILE

Table S5 Studies that reported on bacterial vaginosis and associations with adverse birth outcomes (n=10), in alphabetical order

| First author, publication year, study reference* | Study population                                                                            | Organism/ outcome                        | OR (95% CI)                                                   | Reported associations with genital mycoplasmas                                                                                                                                                                                                                                                                                                                                                                                                                                                                   |
|--------------------------------------------------|---------------------------------------------------------------------------------------------|------------------------------------------|---------------------------------------------------------------|------------------------------------------------------------------------------------------------------------------------------------------------------------------------------------------------------------------------------------------------------------------------------------------------------------------------------------------------------------------------------------------------------------------------------------------------------------------------------------------------------------------|
| Donders, 2009 <sup>36</sup>                      | Cohort study: 759 women; 55 PTB; 64 BV; 14 <i>M. hominis</i>                                | BV/PTB                                   | 2.43 (1.1, 4.7)                                               | Association between lactobacilli and PTB, and between BV and PTB reported as primary analysis. Proportion of women with <i>M. hominis</i> but no BV reported (0.5% of 759), but association between <i>M. hominis</i> and PTB in absence of BV could not be calculated from data presented. Discussion includes, "In the literature, the presence of <i>M. hominis</i> has generally been related to an increased risk of miscarriage, and premature delivery if found in combination with bacterial vaginosis." |
| Hillier, 1988 <sup>57</sup>                      | Case-control study: 94 women; 38 PTB; 28 BV; 29 <i>U. urealyticum</i> ; 5 <i>M. hominis</i> | BV/PTB                                   | 3.31 (1.20, 9.24)                                             | Association between organisms in chorioamnion and PTB reported as primary analysis. BV measured in vaginal smears. Association between genital mycoplasmas and PTB in absence of BV could not be calculated from data presented.                                                                                                                                                                                                                                                                                 |
| Hillier, 1995 <sup>33</sup>                      | Cohort study: 9105 women; 423 PTB; 1392 BV; 2805 <i>M. hominis</i>                          | BV/ PTB<br>MH+, BV+/ PTB<br>MH+, BV-/PTB | 1.60 (1.25, 2.03)<br>1.58 (0.94, 2.77)<br>1.18 (0.91, 1.52)   | Association between BV and PTB of low birthweight infants reported as primary analysis. Raw data not available for association between <i>M. hominis</i> and PTB but reported in text and can be extracted from bar chart of ORs for PTB, stratified by <i>M. hominis</i> , bacteroides and BV. OR for BV and BV with <i>M. hominis</i> similar, and stronger than association for <i>M. hominis</i> alone.                                                                                                      |
| Holst, 1994 <sup>58</sup>                        | Case-control: 87 women; 22 PTB; 16 BV, 20 <i>M. hominis</i> ;                               | BV/PTB<br>MH+, BV+/ PTB<br>MH+, BV-/PTB  | 5.73 (1.54, 21.45)<br>2.62 (0.19, 42.24)<br>2.6 (0.36, 14.63) | Association between BV and PTB reported Relative risk (< 36 weeks, n=22: RR 2.10, 95% CI 1.2, 3.7 and <34 weeks, n=15: RR 2.05; 95% CI 0.9,4.6) as primary analysis. Associations with <i>M. hominis</i> stratified by BV status was calculated from data presented in tables 3 and 5 of the study.                                                                                                                                                                                                              |

## ONLINE SUPPLEMENTAL FILE

| First author, publication year, study reference* | Study population                                                                                                                                                                                       | Organism/outcome    | OR (95% CI)                            | Reported associations with genital mycoplasmas                                                                                                                                                                                                                                                                                                                                                                                                                                                                                                                                                                                                                |
|--------------------------------------------------|--------------------------------------------------------------------------------------------------------------------------------------------------------------------------------------------------------|---------------------|----------------------------------------|---------------------------------------------------------------------------------------------------------------------------------------------------------------------------------------------------------------------------------------------------------------------------------------------------------------------------------------------------------------------------------------------------------------------------------------------------------------------------------------------------------------------------------------------------------------------------------------------------------------------------------------------------------------|
| Kumar, 2006 <sup>69</sup>                        | Case-control study: 120 women; 60 PTB; 31 BV; 6 <i>M. hominis</i>                                                                                                                                      | BV/PTB              | 5.05 (1.97, 12.95)                     | Association between BV and PTB reported as primary analysis. Association between <i>M. hominis</i> and PTB in absence of BV could not be calculated from data presented. Discussion does not mention <i>M. hominis</i> .                                                                                                                                                                                                                                                                                                                                                                                                                                      |
| Menard, 2010 <sup>43</sup>                       | Cohort study: 90 women; 36 PTB; 2 BV; 10 <i>M. hominis</i>                                                                                                                                             |                     |                                        | Association between quantities of BV-associated bacteria and PTB reported as primary analysis. Association between <i>M. hominis</i> and PTB in absence of BV could not be calculated from data presented.                                                                                                                                                                                                                                                                                                                                                                                                                                                    |
| Minkoff, 1984 <sup>44</sup>                      | Cohort study; 188 women with PROM; 74 BV†; <i>T. vaginalis</i> 30; 40 PROM (21 <i>M. hominis</i> ; 16 BV; <i>T. vaginalis</i> 11), 148 not PROM (52 <i>M. hominis</i> ; 42 BV; <i>T. vaginalis</i> 19) | BV/PROM<br>TV/ PROM | 1.68 (0.75, 3.68)<br>2.57 (0.99, 6.41) | Association between quantities of BV-associated bacteria and PROM, and <i>T. vaginalis</i> and PROM were reported as primary analysis, where TV/BV was significant (P-value=0.03). Association between PROM and BV, and PROM and <i>T. vaginalis</i> could be calculated from data presented. Association between <i>M. hominis</i> and PROM in absence of BV and/ or <i>T. vaginalis</i> could not be calculated from data presented. Discussion regarding PROM includes “in stepwise logistic regression, <i>M. hominis</i> was no longer statistically significant when effects of <i>T. vaginalis</i> and <i>S. epidermidis</i> were taken into account.” |
| Odendaal, 2002 <sup>51</sup>                     | Cohort study as sub-study of a randomised controlled trial: 395 women; 119 PTB; 132 BV; 83 <i>M. hominis</i>                                                                                           | MH/BV               | 10.21 (5.63, 18.65)                    | Association between <i>M. hominis</i> and PTB reported as primary analysis. Association between <i>M. hominis</i> and BV reported, but not association between BV and PTB. Discussion includes, “It is also possible that the BV is not directly involved in the causation of premature labour but that it is only a marker of a more important underlying condition such as <i>M. hominis</i> infection,”                                                                                                                                                                                                                                                    |

## ONLINE SUPPLEMENTAL FILE

| First author, publication year, study reference* | Study population                                                                             | Organism/outcome                                                   | OR (95% CI)                                                                                                                      | Reported associations with genital mycoplasmas                                                                                                                                                                                                                                                                                                                                                                                                                             |
|--------------------------------------------------|----------------------------------------------------------------------------------------------|--------------------------------------------------------------------|----------------------------------------------------------------------------------------------------------------------------------|----------------------------------------------------------------------------------------------------------------------------------------------------------------------------------------------------------------------------------------------------------------------------------------------------------------------------------------------------------------------------------------------------------------------------------------------------------------------------|
| Rittenschober-Böhm, 2018 <sup>47</sup>           | Cohort study: 3643 women; 292 PTB; 279 BV; 1347 <i>U. parvum</i> ; 214 <i>U. urealyticum</i> | BV/PTB<br>UP-,BV-/PTB<br>UP+,BV-/PTB<br>UP-,BV+/PTB<br>UP+,BV+/PTB | Crude 1.7 (1.3, 2.2)<br>Adjusted 1.6 (1.1, 2.4)<br>Adjusted 1.6 (1.2, 2.1)<br>Adjusted 1.6 (1.1, 2.3)<br>Adjusted 2.6 (1.7, 4.0) | Associations between <i>Ureaplasma</i> spp. and PTB reported as primary analysis. Associations with <i>U. parvum</i> , stratified by BV status and adjusted for maternal age, diagnosis of vaginal candida, smoking and history of previous PTB. Stratified associations with <i>U. urealyticum</i> not reported on basis of univariable analysis (OR 1.4, 95% CI 0.8, 2.2). Discussion does not mention potential associations between both BV and <i>Ureaplasma</i> spp. |
| Schwab, 2015 <sup>53</sup>                       | Cohort study: 62 women; 23 PTB; 13 BV; 13 <i>M. hominis</i> ;                                | None reported                                                      |                                                                                                                                  | Descriptive study of infections in pregnancy. Association between <i>M. hominis</i> and PTB reported, but not association between BV and PTB.                                                                                                                                                                                                                                                                                                                              |

BV, bacterial vaginosis; CI, confidence interval; MH, *Mycoplasma hominis*; OR, odds ratio; PTB, premature birth; UP, *Ureaplasma parvum*; UU, *Ureaplasma urealyticum*.

\* Study reference is the reference number cited in the main manuscript;

† reported by authors as non-specific vaginitis

## ONLINE SUPPLEMENTAL FILE

Table S6.1 Risk of bias assessment, cohort studies (n=26)

| Questions                                                                                       | Agger, 2014 <sup>1</sup> | Berman, 1987 <sup>34</sup> | Braun, 1971 <sup>35</sup> | Donders, 2009 <sup>36</sup> | Gerber, 2003 <sup>37</sup> |
|-------------------------------------------------------------------------------------------------|--------------------------|----------------------------|---------------------------|-----------------------------|----------------------------|
| 1) The method of allocation to exposure groups was unrelated to potential confounding factors   | NA                       | NA                         | NA                        | NA                          | NA                         |
| 2) Attempts made within design or analysis to balance both groups for potential confounders.    | Yes                      | Unclear                    | Unclear                   | Unclear                     | Unclear                    |
| 3) The groups were comparable at baseline, including all major confounding factors.             | No                       | Yes                        | Unclear                   | Yes                         | Unclear                    |
| 4) Based on above answers, was selection bias present?                                          | No                       | Low                        | Unclear                   | Unclear                     | Unclear                    |
| 5) If so, what is the likely direction of its effect?                                           | Unclear                  | Unclear                    | Unclear                   | Unclear                     | Unclear                    |
| 6) The comparison groups received the same care and support apart from the exposure(s) studied. | Yes                      | Unclear                    | Unclear                   | Yes                         | Unclear                    |
| 7) Participants receiving care and support were kept 'blind' to intervention allocation.        | NA                       | NA                         | NA                        | NA                          | NA                         |
| 8) Individuals administering care, support were kept 'blind' to intervention allocation.        | NA                       | NA                         | NA                        | NA                          | NA                         |
| 9) Based on above answers, was performance bias present?                                        | Unclear                  | Unclear                    | Unclear                   | Unclear                     | Unclear                    |
| 10) If so, what is the likely direction of its effect?                                          | Unclear                  | Unclear                    | Unclear                   | Unclear                     | Unclear                    |
| 11) All groups followed up for an equal length of time?                                         | Low                      | Low                        | Low                       | Low                         | Low                        |
| 12) Number of participants did not complete the intervention in each group?                     | NA                       | NA                         | NA                        | NA                          | NA                         |
| 13) The groups were comparable for intervention completion.                                     | NA                       | NA                         | Unclear                   | NA                          | NA                         |
| 14) For how many participants were no outcome data available?†                                  | 107/783,<br>(13.7%)      | 104/1204<br>(8.6%)         | 203/688<br>(30%)          | 42/801<br>(5.2%)            | 63/317<br>(19.9%)          |
| 15) Were groups comparable for outcome data?                                                    | Unclear                  | Unclear                    | Unclear                   | Yes                         | Unclear                    |
| 16) Based on above answers, was attrition bias present?                                         | Unclear                  | Unclear                    | Unclear                   | Unclear                     | Unclear                    |
| 17) If so, what is the likely direction of its effect?                                          | Unclear                  | Unclear                    | Unclear                   | Unclear                     | Unclear                    |
| 18) The study had an appropriate length of follow-up.                                           | Yes                      | Yes                        | Yes                       | Yes                         | Yes                        |
| 19) The study used a precise definition of outcome.                                             | Yes                      | Unclear                    | No                        | Yes                         | Yes                        |
| 20) A valid, reliable method used to determine the outcome?                                     | Unclear                  | Unclear                    | No                        | Yes                         | Yes                        |
| 21) Investigators were kept 'blind' to participants' exposure to the intervention.              | NA                       | NA                         | NA                        | NA                          | NA                         |
| 22) Investigators were kept 'blind' to other important confounding factors.                     | Unclear                  | Unclear                    | Unclear                   | Unclear                     | Unclear                    |
| 23) Based on above answers, was detection bias present?                                         | Unclear                  | Unclear                    | Unclear                   | No                          | Unclear                    |
| 24) If so, what is the likely direction of its effect?                                          | Unclear                  | Unclear                    | Unclear                   | NA                          | Unclear                    |
| <b>25) Overall assessment of internal validity<sup>a</sup></b>                                  | <b>+</b>                 | <b>-</b>                   | <b>+</b>                  | <b>+</b>                    | <b>+</b>                   |
| <b>26) Overall assessment of external validity<sup>a</sup></b>                                  | <b>+</b>                 | <b>+</b>                   | <b>-</b>                  | <b>+</b>                    | <b>-</b>                   |

## ONLINE SUPPLEMENTAL FILE

| Questions                                                                                       | Govender, 2009 <sup>38</sup> | Harrison, 1983 <sup>39</sup>          | Hillier, 1995 <sup>33</sup> | Kataoka, 2006 <sup>40</sup> | Koucky, 2016 <sup>41</sup> |
|-------------------------------------------------------------------------------------------------|------------------------------|---------------------------------------|-----------------------------|-----------------------------|----------------------------|
| 1) The method of allocation to exposure groups was unrelated to potential confounding factors   | NA                           | NA                                    | NA                          | NA                          | NA                         |
| 2) Attempts made within design or analysis to balance both groups for potential confounders.    | Unclear                      | Unclear                               | Unclear                     | Yes                         | Unclear                    |
| 3) The groups were comparable at baseline, including all major confounding factors.             | Unclear                      | Unclear                               | Unclear                     | No                          | Unclear                    |
| 4) Based on above answers, was selection bias present?                                          | Unclear                      | Unclear                               | Unclear                     | Unclear                     | Unclear                    |
| 5) If so, what is the likely direction of its effect?                                           | Unclear                      | Unclear                               | Unclear                     | Unclear                     | Unclear                    |
| 6) The comparison groups received the same care and support apart from the exposure(s) studied. | Unclear                      | Yes                                   | Yes                         | Yes                         | Yes                        |
| 7) Participants receiving care and support were kept 'blind' to intervention allocation.        | NA                           | NA                                    | NA                          | NA                          | NA                         |
| 8) Individuals administering care and support were kept 'blind' to intervention allocation.     | NA                           | NA                                    | NA                          | NA                          | NA                         |
| 9) Based on above answers, was performance bias present?                                        | Unclear                      | Unclear                               | Unclear                     | Unclear                     | Unclear                    |
| 10) If so, what is the likely direction of its effect?                                          | Unclear                      | Unclear                               | Unclear                     | Unclear                     | Unclear                    |
| 11) All groups followed up for an equal length of time?                                         | Low                          | Low                                   | Low                         | Low                         | Low                        |
| 12) Number of participants did not complete the intervention in each group?                     | NA                           | NA                                    | Na                          | NA                          | NA                         |
| 13) The groups were comparable for intervention completion.                                     | NA                           | NA                                    | NA                          | NA                          | NA                         |
| 14) For how many participants were no outcome data available?‡                                  | 0/199 (0%)                   | SA, 13/361 (3.6%);<br>PND, 0/467 (0%) | 1292/10397<br>(12.4%)       | 163/1040<br>(15.7%)         | 0/36 (0%)                  |
| 15) Were groups comparable for outcome data?                                                    | Unclear                      | Unclear                               | No                          | Unclear                     | Yes                        |
| 16) Based on above answers, was attrition bias present?                                         | Unclear                      | Unclear                               | Unclear                     | Unclear                     | Unclear                    |
| 17) If so, what is the likely direction of its effect?                                          | Unclear                      | Unclear                               | Unclear                     | Unclear                     | Unclear                    |
| 18) The study had an appropriate length of follow-up.                                           | Yes                          | Yes                                   | Yes                         | Yes                         | Yes                        |
| 19) The study used a precise definition of outcome.                                             | Yes                          | No                                    | Yes                         | Yes                         | Yes                        |
| 20) A valid, reliable method used to determine the outcome?                                     | Unclear                      | Unclear                               | No                          | Yes                         | Yes                        |
| 21) Investigators were kept 'blind' to participants' exposure to the intervention.              | NA                           | NA                                    | NA                          | NA                          | NA                         |
| 22) Investigators were kept 'blind' to other important confounding factors.                     | Unclear                      | Unclear                               | Unclear                     | Unclear                     | Unclear                    |
| 23) Based on above answers, was detection bias present?                                         | Unclear                      | Unclear                               | Unclear                     | No                          | Unclear                    |
| 24) If so, what is the likely direction of its effect?                                          | Unclear                      | Unclear                               | Unclear                     | NA                          | Unclear                    |
| <b>25) Overall assessment of internal validity<sup>a</sup></b>                                  | -                            | -                                     | -                           | +                           | +                          |
| <b>26) Overall assessment of external validity<sup>a</sup></b>                                  | -                            | -                                     | -                           | +                           | +                          |



## ONLINE SUPPLEMENTAL FILE

| Questions                                                                                       | Kwak, 2014 <sup>50</sup> | Lee, 2016 <sup>6</sup> | Luton, 1994 <sup>8</sup> | McDonald, 1994 <sup>42</sup>                 | Menard, 2010 <sup>43</sup> |
|-------------------------------------------------------------------------------------------------|--------------------------|------------------------|--------------------------|----------------------------------------------|----------------------------|
| 1) The method of allocation to exposure groups was unrelated to potential confounding factors   | NA                       | NA                     | NA                       | NA                                           | NA                         |
| 2) Attempts made within design or analysis to balance both groups for potential confounders.    | Unclear                  | Unclear                | Yes                      | Yes                                          | Unclear                    |
| 3) The groups were comparable at baseline, including all major confounding factors.             | Unclear                  | Unclear                | Yes                      | Unclear                                      | Unclear                    |
| 4) Based on above answers, was selection bias present?                                          | Unclear                  | Unclear                | Low                      | Unclear                                      | Unclear                    |
| 5) If so, what is the likely direction of its effect?                                           | Unclear                  | Unclear                | Unclear                  | Unclear                                      | Unclear                    |
| 6) The comparison groups received the same care and support apart from the exposure(s) studied. | Unclear                  | Unclear                | Yes                      | Unclear                                      | Yes                        |
| 7) Participants receiving care and support were kept 'blind' to intervention allocation.        | NA                       | NA                     | NA                       | NA                                           | NA                         |
| 8) Individuals administering care and support were kept 'blind' to intervention allocation.     | NA                       | NA                     | NA                       | NA                                           | NA                         |
| 9) Based on above answers, was performance bias present?                                        | Unclear                  | Unclear                | Unclear                  | Unclear                                      | Unclear                    |
| 10) If so, what is the likely direction of its effect?                                          | Unclear                  | Unclear                | Unclear                  | Unclear                                      | Unclear                    |
| 11) All groups followed up for an equal length of time?                                         | Low                      | Low                    | Low                      | Low                                          | Low                        |
| 12) Number of participants did not complete the intervention in each group?                     | NA                       | NA                     | NA                       | NA                                           | NA                         |
| 13) The groups were comparable for intervention completion.                                     | NA                       | NA                     | NA                       | NA                                           | NA                         |
| 14) For how many participants were no outcome data available?‡                                  | 0/179 (0%)               | 0/1035 (0%)            | 37/218 (17%)             | Control, 182/649, (28%); Cases, 42/135 (31%) | 0/90 (0%)                  |
| 15) Were groups comparable for outcome data?                                                    | Yes                      | Yes                    | No                       | Unclear                                      | Yes                        |
| 16) Based on above answers, was attrition bias present?                                         | Low                      | Low                    | Unclear                  | Unclear                                      | Unclear                    |
| 17) If so, what is the likely direction of its effect?                                          | Unclear                  | Unclear                | Unclear                  | Unclear                                      | Unclear                    |
| 18) The study had an appropriate length of follow-up.                                           | Yes                      | Yes                    | Yes                      | Yes                                          | Yes                        |
| 19) The study used a precise definition of outcome.                                             | Yes                      | No                     | Yes                      | Yes                                          | Yes                        |
| 20) A valid, reliable method used to determine the outcome?                                     | Yes                      | No                     | Yes                      | No                                           | Yes                        |
| 21) Investigators were kept 'blind' to participants' exposure to the intervention.              | NA                       | NA                     | NA                       | Unclear                                      | NA                         |
| 22) Investigators were kept 'blind' to other important confounding factors.                     | Unclear                  | Unclear                | Unclear                  | Unclear                                      | NA                         |
| 23) Based on above answers, was detection bias present?                                         | No                       | Yes                    | Unclear                  | Unclear                                      | No                         |
| 24) If so, what is the likely direction of its effect?                                          | NA                       | Unclear                | Unclear                  | Unclear                                      | NA                         |
| <b>25) Overall assessment of internal validity<sup>a</sup></b>                                  | <b>+</b>                 | <b>-</b>               | <b>-</b>                 | <b>-</b>                                     | <b>-</b>                   |
| <b>26) Overall assessment of external validity<sup>a</sup></b>                                  | <b>+</b>                 | <b>-</b>               | <b>-</b>                 | <b>-</b>                                     | <b>-</b>                   |

## ONLINE SUPPLEMENTAL FILE

| Questions                                                                                       | Minkoff, 1984 <sup>44</sup>            | Nguyen, 2004 <sup>45</sup> | Odendaal, 2002 <sup>51</sup> | Payne, 2016 <sup>46</sup> | Payne, 2021 <sup>15</sup> |
|-------------------------------------------------------------------------------------------------|----------------------------------------|----------------------------|------------------------------|---------------------------|---------------------------|
| 1) The method of allocation to exposure groups was unrelated to potential confounding factors   | NA                                     | NA                         | NA                           | NA                        | NA                        |
| 2) Attempts made within design or analysis to balance both groups for potential confounders.    | Unclear                                | Unclear                    | Unclear                      | Unclear                   | No                        |
| 3) The groups were comparable at baseline, including all major confounding factors.             | Unclear                                | Unclear                    | Unclear                      | Unclear                   | Unclear                   |
| 4) Based on above answers, was selection bias present?                                          | Unclear                                | Unclear                    | Unclear                      | Unclear                   | Low                       |
| 5) If so, what is the likely direction of its effect?                                           | Unclear                                | Unclear                    | Unclear                      | Unclear                   | Unclear                   |
| 6) The comparison groups received the same care and support apart from the exposure(s) studied. | Unclear                                | Unclear                    | Yes                          | Unclear                   | Yes                       |
| 7) Participants receiving care and support were kept 'blind' to intervention allocation.        | NA                                     | NA                         | NA                           | NA                        | NA                        |
| 8) Individuals administering care and support were kept 'blind' to intervention allocation.     | NA                                     | NA                         | NA                           | NA                        | NA                        |
| 9) Based on above answers, was performance bias present?                                        | Unclear                                | Unclear                    | Unclear                      | Unclear                   | Unclear                   |
| 10) If so, what is the likely direction of its effect?                                          | Unclear                                | Unclear                    | Unclear                      | Unclear                   | Unclear                   |
| 11) All groups followed up for an equal length of time?                                         | Low                                    | Low                        | Low                          | Low                       | Low                       |
| 12) Number of participants did not complete the intervention in each group?                     | NA                                     | NA                         | NA                           | NA                        | NA                        |
| 13) The groups were comparable for intervention completion.                                     | NA                                     | NA                         | NA                           | NA                        | NA                        |
| 14) For how many participants were no outcome data available?‡                                  | PROM 45/233 (19.3%); PTB 15/233 (6.4%) | 61/456 (13.4%)             | 31/426 (7.3%)                | 15/206 (7.3%)             | 6.4% (64/1000)            |
| 15) Were groups comparable for outcome data?                                                    | Unclear                                | Yes                        | Yes                          | Yes                       | Unclear                   |
| 16) Based on above answers, was attrition bias present?                                         | Unclear                                | Low                        | Unclear                      | Unclear                   | Low                       |
| 17) If so, what is the likely direction of its effect?                                          | Unclear                                | Unclear                    | Unclear                      | Unclear                   | Unclear                   |
| 18) The study had an appropriate length of follow-up.                                           | Yes                                    | Yes                        | Yes                          | Yes                       | Yes                       |
| 19) The study used a precise definition of outcome.                                             | Yes                                    | Yes                        | Yes                          | Yes                       | Yes                       |
| 20) A valid, reliable method used to determine the outcome?                                     | Yes                                    | Unclear                    | Yes                          | Unclear                   | Unclear                   |
| 21) Investigators were kept 'blind' to participants' exposure to the intervention.              | NA                                     | NA                         | NA                           | NA                        | NA                        |
| 22) Investigators were kept 'blind' to other important confounding factors.                     | Unclear                                | Unclear                    | Unclear                      | Unclear                   | Unclear                   |
| 23) Based on above answers, was detection bias present?                                         | No                                     | Unclear                    | Unclear                      | Unclear                   | No                        |
| 24) If so, what is the likely direction of its effect?                                          | NA                                     | Unclear                    | Unclear                      | Unclear                   | NA                        |
| <b>25) Overall assessment of internal validity<sup>a</sup></b>                                  | -                                      | +                          | +                            | +                         | +                         |
| <b>26) Overall assessment of external validity<sup>a</sup></b>                                  | -                                      | +                          | -                            | +                         | +                         |

## ONLINE SUPPLEMENTAL FILE

| Questions                                                                                       | Peretz, 2020 <sup>12</sup>             | Perni, 2004 <sup>52</sup> | Rittenschober-Böhm, 2018 <sup>47</sup> | Schwab, 2015 <sup>53</sup> | Sperling, 1988 <sup>49</sup> | Usui, 2002 <sup>48</sup> |
|-------------------------------------------------------------------------------------------------|----------------------------------------|---------------------------|----------------------------------------|----------------------------|------------------------------|--------------------------|
| 1) The method of allocation to exposure groups was unrelated to potential confounding factors   | NA                                     | NA                        | NA                                     | NA                         | NA                           | NA                       |
| 2) Attempts made within design or analysis to balance both groups for potential confounders.    | Yes                                    | Unclear                   | Yes                                    | No                         | Unclear                      | Unclear                  |
| 3) The groups were comparable at baseline, including all major confounding factors.             | Unclear                                | Unclear                   | Unclear                                | Unclear                    | Unclear                      | Unclear                  |
| 4) Based on above answers, was selection bias present?                                          | Unclear                                | Unclear                   | Low                                    | High                       | Unclear                      | Unclear                  |
| 5) If so, what is the likely direction of its effect?                                           | Unclear                                | Unclear                   | Unclear                                | Unclear                    | Unclear                      | Unclear                  |
| 6) The comparison groups received the same care and support apart from the exposure(s) studied. | Yes                                    | Unclear                   | Unclear                                | Unclear                    | Yes                          | Yes                      |
| 7) Participants receiving care and support were kept 'blind' to intervention allocation.        | NA                                     | NA                        | NA                                     | NA                         | NA                           | NA                       |
| 8) Individuals administering care and support were kept 'blind' to intervention allocation.     | NA                                     | NA                        | NA                                     | NA                         | NA                           | NA                       |
| 9) Based on above answers, was performance bias present?                                        | Unclear                                | Unclear                   | Unclear                                | Unclear                    | Unclear                      | Low                      |
| 10) If so, what is the likely direction of its effect?                                          | Unclear                                | Unclear                   | Unclear                                | Unclear                    | Unclear                      | NA                       |
| 11) All groups followed up for an equal length of time?                                         | Low                                    | Low                       | Low                                    | Low                        | Low                          | Low                      |
| 12) Number of participants did not complete the intervention in each group?                     | NA                                     | NA                        | NA                                     | NA                         | NA                           | NA                       |
| 13) The groups were comparable for intervention completion.                                     | NA                                     | NA                        | NA                                     | NA                         | NA                           | NA                       |
| 14) For how many participants were no outcome data available?†                                  | PTB, 195/214 (91%); LBW, 192/214 (90%) | 14/193 (7.3%)             | 687/4330 (15.9%)                       | 97/159 (61.0%)             | 5/409 (1.2%)                 | 0/1958 (0%)              |
| 15) Were groups comparable for outcome data?                                                    | No                                     | Unclear                   | Unclear                                | Unclear                    | Yes                          | Yes                      |
| 16) Based on above answers, was attrition bias present?                                         | High                                   | Unclear                   | Unclear                                | High                       | Low                          | Low                      |
| 17) If so, what is the likely direction of its effect?                                          | Unclear                                | Unclear                   | Unclear                                | Unclear                    | NA                           | NA                       |
| 18) The study had an appropriate length of follow-up.                                           | Yes                                    | Yes                       | Yes                                    | Yes                        | Yes                          | Yes                      |
| 19) The study used a precise definition of outcome.                                             | Yes                                    | Yes                       | Yes                                    | Yes                        | Yes                          | Yes                      |
| 20) A valid, reliable method used to determine the outcome?                                     | Yes                                    | Unclear                   | Yes                                    | No                         | No                           | Yes                      |
| 21) Investigators were kept 'blind' to participants' exposure to the intervention.              | NA                                     | NA                        | NA                                     | NA                         | NA                           | NA                       |
| 22) Investigators were kept 'blind' to other important confounding factors.                     | NA                                     | Unclear                   | Unclear                                | Unclear                    | Unclear                      | Unclear                  |
| 23) Based on above answers, was detection bias present?                                         | No                                     | Unclear                   | No                                     | Yes                        | Unclear                      | Unclear                  |

## ONLINE SUPPLEMENTAL FILE

| Questions                                                      | Peretz, 2020 <sup>12</sup> | Perni, 2004 <sup>52</sup> | Rittenschober-Böhm, 2018 <sup>47</sup> | Schwab, 2015 <sup>53</sup> | Sperling, 1988 <sup>49</sup> | Usui, 2002 <sup>48</sup> |
|----------------------------------------------------------------|----------------------------|---------------------------|----------------------------------------|----------------------------|------------------------------|--------------------------|
| 24) If so, what is the likely direction of its effect?         | NA                         | Unclear                   | NA                                     | Unclear                    | Unclear                      | Unclear                  |
| <b>25) Overall assessment of internal validity<sup>a</sup></b> | -                          | +                         | +                                      | -                          | -                            | +                        |
| <b>26) Overall assessment of external validity<sup>a</sup></b> | -                          | +                         | +                                      | -                          | -                            | -                        |

High, high risk of bias; Low, low risk of bias; LBW, low birth weight; NA, not applicable; NK, not known; PTB, preterm birth; Unclear, unclear of risk of bias. ‡Both groups combined unless stated.

Validity <sup>a</sup>: ++ all or most of checklist criteria fulfilled; + some of checklist criteria fulfilled; – few or no checklist criteria fulfilled.

Study reference number is the reference number cited in the main manuscript

## ONLINE SUPPLEMENTAL FILE

Table S6.2 Risk of bias assessment, case-control studies (n=22)

| Questions                                                                                       | Ahmadi, 2014 <sup>9</sup> | Cassell, 1993 <sup>32</sup> | Chua, 1999 <sup>67</sup> | Daskalakis, 2009 <sup>65</sup> | Embree, 1980 <sup>54</sup> | Farhadifar, 2016 <sup>11</sup> |
|-------------------------------------------------------------------------------------------------|---------------------------|-----------------------------|--------------------------|--------------------------------|----------------------------|--------------------------------|
| 1) Appropriate and clearly focused question.                                                    | WC                        | WC                          | WC                       | WC                             | AA                         | WC                             |
| 2) The cases and controls are taken from comparable populations.                                | AA                        | WC                          | WC                       | AA                             | PA                         | AA                             |
| 3) The same exclusion criteria are used for both cases and controls.                            | WC                        | NA                          | PA                       | WC                             | NAd                        | AA                             |
| 4) What was the participation rate (%) for each group (cases)?                                  | Unclear                   | 29/33 (87.9%)               | Unclear                  | Unclear                        | 100% (n=446)               | Unclear                        |
| 5) What was the participation rate (%) for each group (controls)?                               | Unclear                   | 100% (n=28)                 | Unclear                  | Unclear                        | 100% (n=108)               | Unclear                        |
| 6) Both groups compared to establish their similarities or differences.                         | NAd                       | NAd                         | NAd                      | NAd                            | NAd                        | NAd                            |
| 7) Cases are clearly defined and differentiated from controls.                                  | WC                        | AA                          | AA                       | WC                             | AA                         | WC                             |
| 8) It is clearly established that controls are not cases.                                       | WC                        | AA                          | AA                       | WC                             | AA                         | WC                             |
| 9) Measures taken to prevent knowledge of primary exposure from influencing case ascertainment. | NA                        | NA                          | NA                       | NA                             | NA                         | NA                             |
| 10) Exposure status is measured in a standard, valid and reliable way.                          | WC                        | AA                          | AA                       | WC                             | AA                         | AA                             |
| 11) Main potential confounders are accounted for in design/analysis                             | AA                        | PA                          | NR                       | AA                             | PA                         | AA                             |
| 12) Confidence intervals provided?                                                              | No                        | No                          | No                       | No                             | No                         | Yes                            |
| <b>13) Study results internally valid<sup>a</sup></b>                                           | <b>+</b>                  | <b>+</b>                    | <b>+</b>                 | <b>+</b>                       | <b>-</b>                   | <b>+</b>                       |
| <b>14) Study results externally valid<sup>a</sup></b>                                           | <b>+</b>                  | <b>-</b>                    | <b>+</b>                 | <b>+</b>                       | <b>-</b>                   | <b>+</b>                       |

| Questions                                                               | Freitas, 2018 <sup>55</sup> | González Bosquet, 2006 <sup>66</sup> | Harada, 2008 <sup>56</sup> | Hillier, 1988 <sup>57</sup> | Holst, 1994 <sup>58</sup> | Jones, 2009 <sup>10</sup> |
|-------------------------------------------------------------------------|-----------------------------|--------------------------------------|----------------------------|-----------------------------|---------------------------|---------------------------|
| 1) Appropriate and clearly focused question.                            | AA                          | WC                                   | WC                         | WC                          | WC                        | WC                        |
| 2) The cases and controls are taken from comparable populations.        | PA                          | AA                                   | AA                         | AA                          | PA                        | PA                        |
| 3) The same exclusion criteria are used for both cases and controls.    | NAd                         | AA                                   | AA                         | PA                          | AA                        | NAd                       |
| 4) What was the participation rate for each group (cases)? %            | 100% (n=46)                 | Unclear                              | Unclear                    | 99/107 (92.5%)              | 49/120 (40.8%)            | Unclear                   |
| 5) What was the participation rate for each group (controls)? %         | 100% (n=170)                | Unclear                              | Unclear                    | 68/140 (48.6%)              | 38/38 (100%)              | Unclear                   |
| 6) Both groups compared to establish their similarities or differences. | AA                          | NAd                                  | NAd                        | NAd                         | NAd                       | NAd                       |
| 7) Cases are clearly defined and differentiated from controls.          | AA                          | WC                                   | AA                         | WC                          | WC                        | AA                        |
| 8) It is clearly established that controls are not cases.               | AA                          | WC                                   | AA                         | WC                          | WC                        | AA                        |

## ONLINE SUPPLEMENTAL FILE

| Questions                                                                                       | Freitas,<br>2018 <sup>55</sup> | González<br>Bosquet,<br>2006 <sup>66</sup> | Harada,<br>2008 <sup>56</sup> | Hillier,<br>1988 <sup>57</sup> | Holst,<br>1994 <sup>58</sup> | Jones,<br>2009 <sup>10</sup> |
|-------------------------------------------------------------------------------------------------|--------------------------------|--------------------------------------------|-------------------------------|--------------------------------|------------------------------|------------------------------|
| 9) Measures taken to prevent knowledge of primary exposure from influencing case ascertainment. | NA                             | NA                                         | NA                            | NA                             | NA                           | NA                           |
| 10) Exposure status is measured in a standard, valid, and reliable way.                         | WC                             | AA                                         | WC                            | AA                             | AA                           | WC                           |
| 11) Main potential confounders are accounted for in design/analysis                             | PA                             | PA                                         | PA                            | WC                             | AA                           | NAd                          |
| 12) Confidence intervals provided?                                                              | No                             | No                                         | Yes                           | Yes                            | No                           | No                           |
| <b>13) Study results internally valid<sup>a</sup></b>                                           | +                              | +                                          | +                             | +                              | ++                           | -                            |
| <b>14) Study results externally valid<sup>a</sup></b>                                           | -                              | +                                          | +                             | +                              | +                            | -                            |

| Questions                                                                                       | Kaceroovsky,<br>2009 <sup>68</sup> | Kumar,<br>2006 <sup>69</sup> | McDonald,<br>1992 <sup>59</sup> | Mitsunari,<br>2005 <sup>60</sup> | Montenegro,<br>2019 <sup>70</sup> |
|-------------------------------------------------------------------------------------------------|------------------------------------|------------------------------|---------------------------------|----------------------------------|-----------------------------------|
| 1) Appropriate and clearly focused question.                                                    | WC                                 | AA                           | AA                              | WC                               | WC                                |
| 2) The cases and controls are taken from comparable populations.                                | PA                                 | PA                           | AA                              | WC                               | AA                                |
| 3) The same exclusion criteria are used for both cases and controls.                            | PA                                 | NAd                          | PA                              | WC                               | AA                                |
| 4) What was the participation rate for each group (cases)?                                      | Unclear                            | 100% (n=60)                  | Unclear                         | 23/40 (57.5%)                    | 84 (100%)                         |
| 5) What was the participation rate for each group (controls)?                                   | Unclear                            | 100% (n=60)                  | Unclear                         | 59/97 (60.8%)                    | 127 (1000%)                       |
| 6) Both groups compared to establish their similarities or differences.                         | NAd                                | NAd                          | AA                              | NA                               | NA                                |
| 7) Cases are clearly defined and differentiated from controls.                                  | WC                                 | NAd                          | AA                              | AA                               | AA                                |
| 8) It is clearly established that controls are not cases.                                       | PA                                 | AA                           | AA                              | AA                               | AA                                |
| 9) Measures taken to prevent knowledge of primary exposure from influencing case ascertainment. | NA                                 | NA                           | NA                              | NA                               | NA                                |
| 10) Exposure status is measured in a standard, valid, and reliable way.                         | AA                                 | PA                           | PA                              | WC                               | WC                                |
| 11) Main potential confounders are accounted for in design/analysis                             | PA                                 | NAd                          | AA                              | PA                               | PA                                |
| 12) Confidence intervals provided?                                                              | No                                 | No                           | Yes                             | No                               | No                                |
| <b>13) Study results internally valid<sup>a</sup></b>                                           | -                                  | -                            | +                               | +                                | +                                 |
| <b>14) Study results externally valid<sup>a</sup></b>                                           | -                                  | -                            | +                               | +                                | +                                 |

## ONLINE SUPPLEMENTAL FILE

| Questions                                                                                       | Munday,<br>1984 <sup>61</sup> | Oliveira,<br>2020 <sup>7</sup> | Payne,<br>2014 <sup>62</sup> | Toth,<br>1992 <sup>63</sup> | Yoon,<br>2001 <sup>64</sup> |
|-------------------------------------------------------------------------------------------------|-------------------------------|--------------------------------|------------------------------|-----------------------------|-----------------------------|
| 1) Appropriate and clearly focused question.                                                    | WC                            | AA                             | WC                           | WC                          | WC                          |
| 2) The cases and controls are taken from comparable populations.                                | AA                            | PA                             | WC                           | AA                          | AA                          |
| 3) The same exclusion criteria are used for both cases and controls.                            | NAd                           | PA                             | AA                           | PA                          | PA                          |
| 4) What was the participation rate for each group (cases)?                                      | Unclear                       | 100% (n=unclear)               | 100% (n=unclear)             | Unclear                     | Unclear                     |
| 5) What was the participation rate for each group (controls)?                                   | Unclear                       | 100% (n=unclear)               | 100% (n=unclear)             | Unclear                     | Unclear                     |
| 6) Both groups compared to establish their similarities or differences.                         | NA                            | AA                             | NAd                          | NA                          | NA                          |
| 7) Cases are clearly defined and differentiated from controls.                                  | PA                            | WC                             | AA                           | PA                          | WC                          |
| 8) It is clearly established that controls are not cases.                                       | PA                            | WC                             | PA                           | PA                          | WC                          |
| 9) Measures taken to prevent knowledge of primary exposure from influencing case ascertainment. | NA                            | NA                             | NAd                          | NA                          | NA                          |
| 10) Exposure status is measured in a standard, valid, and reliable way.                         | AA                            | AA                             | AA                           | PA                          | WC                          |
| 11) Main potential confounders are accounted for in design/analysis                             | PA                            | AA                             | NAd                          | PA                          | AA                          |
| 12) Confidence intervals provided?                                                              | No                            | Yes                            | Yes                          | No                          | No                          |
| <b>13) Study results internally valid<sup>a</sup></b>                                           | <b>+</b>                      | <b>+</b>                       | <b>+</b>                     | <b>-</b>                    | <b>+</b>                    |
| <b>14) Study results externally valid<sup>a</sup></b>                                           | <b>-</b>                      | <b>+</b>                       | <b>+</b>                     | <b>-</b>                    | <b>+</b>                    |

AA, adequately addressed; NAd, not addressed; NA, not applicable; PA, poorly addressed; Unclear, does not have data on how many were excluded or declined to participate but only present numbers; WC, well covered.

Validity <sup>a</sup>: ++, all or most of checklist criteria fulfilled; + some of checklist criteria fulfilled; – few or no checklist criteria fulfilled.

Study reference number is the reference number cited in the main manuscript.

## ONLINE SUPPLEMENTAL FILE

Table S6.3 Risk of bias assessment, cross-sectional studies (n=5)

| Questions                                                                           | Grattard,<br>1995 <sup>71</sup> | Kundsin,<br>1984 <sup>72</sup> | McCormack,<br>1975 <sup>73</sup> | Nasution,<br>2007 <sup>75</sup> | Sweeney,<br>2016 <sup>74</sup> |
|-------------------------------------------------------------------------------------|---------------------------------|--------------------------------|----------------------------------|---------------------------------|--------------------------------|
| 1) Is the source population, source area well described?                            | +                               | NR                             | -                                | NR                              | +                              |
| 2) Is the eligible population or area representative of the source population?      | +                               | NR                             | -                                | NR                              | -                              |
| 3) Do the selected participants or areas represent the eligible population or area? | NR                              | -                              | -                                | NR                              | -                              |
| 4) Selection of exposure (and comparison) group. How was selection bias minimised?  | NR                              | NR                             | NR                               | NR                              | NR                             |
| 5) Was the selection of explanatory variables based on a sound theoretical basis?   | -                               | +                              | -                                | +                               | +                              |
| 6) Was the contamination acceptably low?                                            | NA                              | NA                             | NA                               | NR                              | NA                             |
| 7) How well were likely confounding factors identified and controlled?              | NR                              | NR                             | NR                               | NR                              | -                              |
| 8) Outcome measures and procedures reliable?                                        | -                               | +                              | -                                | +                               | -                              |
| 9) Were the outcome measurements complete?                                          | +                               | +                              | +                                | ++                              | +                              |
| 10) Were all the important outcomes assessed?                                       | +                               | +                              | +                                | +                               | ++                             |
| 11) Was there a similar follow-up time in exposure and comparison groups?           | -                               | ++                             | +                                | ++                              | +                              |
| 12) Was follow-up time meaningful?                                                  | +                               | ++                             | +                                | ++                              | +                              |
| 13) Was the study sufficiently powered to detect an exposure effect (if one exists) | NA                              | NA                             | NA                               | NR                              | NA                             |
| 14) Were multiple explanatory variables considered in analyses?                     | NR                              | NR                             | NR                               | NR                              | NR                             |
| 15) Were the analytical methods appropriate?                                        | -                               | -                              | +                                | -                               | +                              |
| 16) Was the precision of association given or calculable?                           | +                               | +                              | +                                | +                               | +                              |
| <b>17) Overall assessment of internal validity<sup>a</sup></b>                      | -                               | -                              | +                                | -                               | +                              |
| <b>18) Overall assessment of external validity<sup>a</sup></b>                      | +                               | +                              | -                                | -                               | -                              |

++, yes; +, mostly; -, no; NR, not reported; NA, not applicable. Validity <sup>a</sup>: ++, all or most of checklist criteria fulfilled; + some of checklist criteria fulfilled; - few or no checklist criteria fulfilled.

Study reference number is the reference number cited in the main manuscript.



**ONLINE SUPPLEMENTAL FILE****Table S7** Summary of assessment of regression analysis for small study effects, for outcomes reported in 10 or more studies

| Organism              | Outcome              | Number of studies | Egger test coefficient (95% CI) | P value |
|-----------------------|----------------------|-------------------|---------------------------------|---------|
| <i>M. hominis</i>     | Preterm birth        | 30                | 0.56 (-0.08, 1.2)               | 0.09    |
|                       | PROM                 | 11                | 0.05 (-1.07, 1.17)              | 0.92    |
|                       | Spontaneous abortion | 10                | -0.28 (-3.20, 2.64)             | 0.83    |
| <i>U. urealyticum</i> | Preterm birth        | 16                | 0.24 (-0.57, 1.06)              | 0.42    |
| <i>U. parvum</i>      | Preterm birth        | 13                | 0.25 (-0.24, 0.75)              | 0.25    |

CI, confidence interval; PROM: premature rupture of membrane.
